# Supplementary material for: Combination of a Novel Gene Expression Signature with a Clinical Nomogram Improves the Prediction of Survival in High-Risk Bladder Cancer
Source: Oxford University Press journal article supplement (doi:10.1158/1078-0432.ccr-11-2271), 2012-01-06
Supplement: 10780432ccr112271-sup-t1_xls_52k.xls [file 10780432ccr112271-sup-t1_xls_52k.xls]

## Sheet: Sheet1
ID	Gender	PreOpClinStage	Age at RC	Survival Months	RC_Stage	RC_Histology	PLND Result	RC Grade	Nomogram Score	Distant Mets	Local Recurrence	Urothelial Recurrence	Metastasis	Last known status	PreRC_Chemo	Post RC_Chemo	PostChemo type	Smoking	SmokingPack-Years	Recurrence Free Survival Months (Distant and Local)	Recurrence/DOD	Cluster
1_pT2	male	T3	64.06	104	pT2	TCC	Negative	High	81.44	0	0	1	0	DOC	No	No		Former	20	104	No	2
2_pT2	male	T2	62.14	13	pT2	TCC	Negative	High	81.712	1	0	0	1	DOD	No	Yes	salvage	Never		7	Yes	2
3_pT2	female	T2	65.96	20	pT2	TCC	Negative	High	79.9574	0	0	1	0	DOD	No	No		Current	80	10	Yes	1
4_pT4	male	T2	56.1	16	pT4	TCC	Positive	High	11.0851	1	0	0	1	DOD	No	No		Former	35	16	Yes	2
5_pT4	female	T3	68	13	pT4	TCC/CIS	Negative	High	49.0636	0	0	0	0	DOC	No	No		Former	20	13	No	1
6_pT3	male	T2	69.93	4	pT3	TCC	Nx	High	41.3996	1	0	0	1	DOD	No	No		Former	50	3	Yes	1
7_pT1	male	T2	65	88	pT1	TCC	Positive	High	50.1282	0	0	0	0	DOC	No	No		Current	50	88	No	2
8_pT3	male	T1	69.44	174	pT3	TCC/CIS	Negative	High	64.4873	0	0	0	0	NED	No	No		Never		174	No	2
9_pT2	male	T2	47.47	109	pT2	TCC	Negative	High	76.4958	1	0	0	1	DOD	No	Yes	salvage	Former	30	96	Yes	1
10_pT3	female	T2	77.9	176	pT3	TCC	Nx	High	52.6107	0	0	0	0	DOC	No	No		Former	20	176	No	2
11_pT1	male	T1	66.56	168	pT1	TCC	Negative	Low	90.1988	0	0	0	0	NED	No	No		Never		168	No	1
12_pT2	male	T1	65.11	103	pT2	TCC	Negative	High	40.6292	1	0	1	1	DOD	No	No		Never		100	Yes	2
13_pT3	male	T2	76.93	0	pT3	TCC/Squamous	Negative	High	61.8048	0	0	0	0	DOC	No	No		Former	45	0	No	2
14_pT4	male	T2	68.04	11	pT4	TCC	Positive	High	1	1	1	0	1	DOD	No	Yes	adjuvant	Former	80	7	Yes	2
15_pT4	female	T1	68.03	3	pT4	TCC/Squamous	Negative	High	47.7962	0	0	0	0	DOC	No	No		Current	40	3	No	2
16_pT3	male	T2	72.77	3	pT3	TCC	Positive	High	21.5225	1	1	0	1	DOD	No	No		Current	120	2	Yes	2
17_pT3	female	T1	59.65	1	pT3	TCC	Positive	High	28.6132	0	0	0	0	NED	No	No		Former	20	1	No	1
18_pT3	male	T2	51.33	12	pT3	TCC	Negative	High	69.7544	1	1	0	1	DOD	No	Yes	adjuvant	Former	10	8	Yes	2
19_pT2	male	T2	73.32	31	pT2	TCC	Nx	High	25.4017	0	0	0	0	NED	No	No		Current	10	31	No	2
20_pT4	male	T3	56.61	8	pT4	TCC	Positive	High	8.27007	1	0	0	1	DOD	Yes	Yes	salvage	Former	35	3	Yes	1
21_pT4	male	T2	78.08	25	pT4	TCC	Positive	High	4.92522	0	0	0	0	DOC	No	No		Former	120	25	No	2
22_pT3	male	T2	68.75	13	pT3	TCC	Positive	High	1	1	1	0	1	DOD	No	Yes	salvage	Former	5	8	Yes	2
23_pT4	male	T2	69.49	1	pT4	TCC	Nx	High	36.0937	0	0	0	0	DOC	No	No		Former	unk	1	No	2
24_pT4	male	T3	62.08	7	pT4	TCC	Positive	High	9.67248	1	0	0	1	DOD	No	Yes	adjuvant	Former	10	4	Yes	2
25_pT3	female	T2	72.72	3	pT3	TCC	Negative	High	60.7897	0	0	0	0	DOC	No	No		Never		3	No	1
26_pT4	female	T2	72.4	14	pT4	TCC	Nx	High	34.3758	1	1	0	1	DOD	No	Yes	salvage	Former	60	8	Yes	1
27_pT1	male	T1	59.39	57	pT1	TCC	Negative	High	81.9696	0	0	0	0	NED	No	No		Never		57	No	1
28_pT3	male	T3	74.61	58	pT3	TCC	Positive	High	21.9639	1	1	1	1	DOD	No	Yes	salvage	Current	60	8	Yes	2
29_pT3	male	T2	58.15	5	pT3	TCC	Positive	High	17.3088	1	1	0	1	DOD	No	No		Former	70	3	Yes	2
30_pT4	female	T2	52.99	9	pT4	TCC/Squamous	Negative	High	46.6726	1	1	0	1	DOD	No	Yes	salvage	Former	unk	2	Yes	2
31_pT4	male	T2	64.53	13	pT4	TCC	Positive	High	9.39539	1	0	0	1	DOD	No	Yes	adjuvant	Former	5	11	Yes	NA
32_pT3	male	T2	56.47	73	pT3	TCC/Squamous	Negative	High	67.5943	0	0	0	0	NED	No	Yes	adjuvant	Current	60	73	No	2
33_pTa	male	T2	73.42	90	pTa	TCC	Negative	Low	89.8821	0	0	1	0	DOD	No	No		Former	10	90	Yes	1
34_pT3	male	T1	68.35	20	pT3	TCC	Negative	High	64.3377	1	1	0	1	DOD	No	Yes	adjuvant	Former	60	13	Yes	2
35_pT4	female	Ta	68.72	5	pT4	TCC	Positive	High	1	0	0	0	0	DOC	No	No		Current	90	5	No	2
36_pT3	male	T2	84.48	3	pT3	TCC	Nx	High	38.2454	0	0	0	0	NED	No	No		Former	40	3	No	2
37_pTa	female	T1	75.32	91	pTa	TCC	Negative	High	76.0289	0	0	0	0	DOC	No	No		Current	60	91	No	1
38_pT3	female	T2	91.08	3	pT3	TCC	Nx	High	31.8102	0	0	0	0	DOC	No	No		Former	50	3	No	2
39_pT3	male	T1	57.33	28	pT3	TCC	Positive	High	22.165	1	0	0	1	DOD	No	Yes	adjuvant	Never		22	Yes	1
40_pT3	female	T2	77	10	pT3	TCC	NX	High	46.4477	1	1	0	1	DOD	No	Yes	salvage	Former	40	7	Yes	2
41_pT3	male	T2	80.66	103	pT3	TCC	Negative	High	43.1078	0	0	0	0	DOC	No	No		Former	60	103	No	1
42_pT3	female	T2	74.92	3	pT3	TCC	Positive	High	23.8132	1	1	0	1	DOD	No	Yes	salvage	Former	58	2	Yes	2
43_pT3	male	T2	75.2	110	pT3	TCC	Negative	High	59.5907	0	1	1	1	DOD	No	Yes	salvage	Former	30	7	Yes	1
44_pT1	male	T1	88.5	106	pT1	TCC	Nx	High	69.0645	0	0	0	0	NED	No	No		Never		106	No	1
45_pT3	male	T2	69.75	6	pT3	TCC	Positive	High	20.6526	0	0	0	0	DOC	No	No		Former	40	6	No	1
46_pT4	male	T3	89.46	8	pT4	TCC	Nx	High	15.3875	1	1	0	1	DOD	No	No		Former	10	6	Yes	2
47_pT2	female	T2	53	17	pT2	TCC	Negative	High	82.5154	1	0	0	1	DOD	No	No		Former	unk	16	Yes	2
48_pT2	male	T1	80.4	64	pT2	TCC	Negative	High	68.9714	0	0	0	0	DOC	No	No		Never		64	No	2
49_pTa	female	T2	66.03	121	pTa	TCC	Negative	High	54.1425	0	0	0	0	NED	No	No		Current	25	121	No	1
50_pT4	male	T3	55.56	45	pT4	TCC	Positive	High	12.3871	0	0	0	0	NED	No	Yes	adjuvant	Current	30	45	No	1
51_pTa	male	Ta	78.05	92	pTa	TCC	Negative	High	82.5237	0	0	0	0	DOC	No	No		Former	10	92	No	1
52_pT4	female	T2	68.7	4	pT4	TCC	Positive	High	6.79776	1	0	0	1	DOD	No	Yes	salvage	Never		4	Yes	1
53_pT3	male	T2	61.14	79	pT3	TCC/Squamous	Negative	High	68.6072	0	0	0	0	DOC	No	No		Never		79	No	2
54_pT3	female	T2	79.39	14	pT3	TCC	Positive	High	20.6374	1	1	0	1	DOD	No	Yes	salvage	Former	5	3	Yes	1
55_pT3	female	T2	84.11	65	pT3	TCC	Nx	High	4.81448	0	0	0	0	DOC	No	No		Former	50	65	No	1
56_pT4	male	T2	83.63	1	pT4	TCC	Nx	High	23.1737	0	0	0	0	DOD	No	No		Former	30	1	Yes	1
57_pT3	male	T2	71.91	13	pT3	TCC	Positive	High	22.5511	1	0	0	1	DOD	No	Yes	salvage	Former	40	1	Yes	1
58_pT2	male	T1	74.68	109	pT2	TCC	Negative	High	76.8974	0	0	0	0	DOC	No	No		Former	100	109	No	1
59_pT3	male	T2	60.47	112	pT3	TCC	Negative	High	67.2895	1	1	0	1	NED	No	Yes	salvage	Never		15	Yes	1
60_pT3	male	T2	81.49	10	pT3	TCC	Negative	High	57.468	1	0	0	1	DOD	No	No		Former	60	9	Yes	NA
61_pT3	female	T2	67.33	103	pT3	TCC	Negative	High	66.0529	0	0	0	0	NED	No	Yes	adjuvant	Never		103	No	2
62_pT3	male	T2	84.02	8	pT3	TCC	Negative	High	46.6008	0	0	0	0	DOC	No	No		Former	40	8	No	1
63_pT4	male	T2	69.17	102	pT4	TCC	Positive	High	1	0	0	1	0	NED	No	Yes	adjuvant	Former	55	102	No	2
64_pT3	male	T2	72.87	33	pT3	TCC	Negative	High	14.5222	0	0	0	0	DOC	No	No		Current	120	33	No	1
65_pT1	male	T1	62.44	3	pT1	TCC	Negative	Low	90.7068	0	0	0	0	DOC	No	No		Former	30	3	No	1
66_pTa	male	Ta	57.37	80	pTa	TCC	Negative	Low	92.1545	0	0	0	0	NED	No	No		Former	unk	80	No	1
67_pT3	male	T2	81.5	104	pT3	TCC	Negative	High	10.629	0	0	0	0	DOC	No	No		Current	25	104	No	2
68_pT1	female	Ta	72.61	101	pT1	TCC	NX	Low	54.0253	0	0	0	0	NED	No	No		Former	15	101	No	1
69_pT1	female	Ta	85.09	92	pT1	TCC	Negative	High	79.1793	0	0	0	0	NED	No	No		Former	5	92	No	1
70_pT3	male	T2	74.09	98	pT3	TCC	Negative	High	62.5582	0	0	0	0	NED	No	Yes	adjuvant	Former	20	98	No	2
71_pT4	male	T3	78.82	15	pT4	TCC	Negative	high	27.1968	0	0	0	0	DOC	No	No		Former	30	15	No	2
72_pT2	male	T2	67.15	7	pT2	TCC	Negative	High	39.5606	0	0	0	0	DOC	No	No		Former	10	7	No	2
73_pT3	male	T2	74.75	13	pT3	TCC	Negative	High	60.5648	1	1	0	1	DOD	No	Yes	salvage	Never		7	Yes	1
74_pT3	male	T2	66.19	67	pT3	TCC	Negative	High	17.6265	0	0	0	0	DOC	No	No		Former	40	67	No	1
75_pT1	male	Ta	57.72	43	pT1	TCC	Negative	Low	67.0897	0	0	0	0	NED	No	No		Current	30	43	No	1
76_pT2	male	T1	78.51	52	pT2	TCC	Nx	High	61.3827	0	0	0	0	DOC	No	No		Former	80	52	No	2
77_pT2	male	T1	61.87	15	pT2	TCC	Negative	High	42.1091	1	1	1	1	DOD	no	Yes	salvage	Never		5	Yes	1
78_pT3	male	T3	69.63	85	pT3	TCC	Positive	High	21.1116	0	0	0	0	NED	No	No		Current	30	85	No	1
79_pT3	female	T1	72.75	85	pT3	TCC	Positive	High	10.6122	0	0	0	0	NED	No	Yes	adjuvant	Current	80	85	No	2
80_pT3	male	T2	80.46	18	pT3	TCC	Nx	High	38.7291	0	1	0	1	DOD	No	No		Former	90	16	Yes	1
81_pT3	female	T2	41.73	86	pT3	TCC	Negative	High	71.5987	0	0	0	0	NED	No	Yes	adjuvant	Current	30	86	No	1
82_pT1	male	Ta	74.82	89	pT1	TCC	Negative	High	81.6631	0	0	0	0	NED	No	No		Former	55	89	No	1
83_pT2	male	Ta	58.21	81	pT2	TCC	Negative	High	43.4288	0	0	0	0	NED	No	No		Former	60	81	No	1
84_pT2	male	T1	51.33	43	pT2	TCC	Negative	High	82.3851	0	0	0	0	NED	No	No		Never		43	No	1
85_pT4	male	T1	50.67	34	pT4	TCC	Positive	High	11.9171	0	0	0	0	NED	No	Yes	adjuvant	Former	40	34	No	2
86_pT3	male	T2	47.85	12	pT3	TCC	Negative	High	61.6198	1	1	0	1	DOD	Yes	Yes	salvage	Current	80	6	Yes	1
87_pT3	female	T3	68.14	33	pT3	TCC	Negative	High	65.9217	1	0	0	1	DOD	No	Yes	salvage	Never		12	Yes	2
88_pT3	male	T1	82.72	12	pT3	TCC	Positive	High	9.75735	1	1	0	1	DOD	No	Yes	salvage	Current	40	3	Yes	1
89_pT1	male	T2	69.1	52	pT1	TCC	Positive	High	55.4987	1	0	0	1	DOD	No	Yes	adjuvant	Former	10	51	Yes	1
90_pT2	male	T2	73.75	46	pT2	TCC	Positive	High	3.652	0	0	0	0	NED	No	Yes	adjuvant	Former	60	46	No	NA
91_pT2	female	T4	67.38	72	pT2	TCC	Negative	High	78.0426	0	0	0	0	NED	Yes	No		Never		72	No	1
92_pT3	male	T2	64.83	6	pT3	TCC	Positive	High	25.7632	1	0	0	1	DOD	No	No		Former	75	2	Yes	2
93_pT2	male	T2	78.3	65	pT2	TCC	Nx	High	64.1973	0	0	1	0	NED	No	No		Former	30	65	No	1
