# Supplementary material for: Combination of a Novel Gene Expression Signature with a Clinical Nomogram Improves the Prediction of Survival in High-Risk Bladder Cancer
Source: Oxford University Press journal article supplement (doi:10.1158/1078-0432.ccr-11-2271), 2012-01-06
Supplement: 10780432ccr112271-sup-t4_xls_2757k.xls [file 10780432ccr112271-sup-t4_xls_2757k.xls]

## Sheet: Method Notes
This file contains all significantly differentially expressed genes (using the limma method) indentified among stage, grade and molecular subtype in external datasets.
Stransky and Dyrskjot datasets were normalized from raw data with the gcrma Bioconductor package, The Sanchez-Carbayo dataset was obtained from the supplementary material.
Affymetrix control probe sets and probe sets with overall low expression (all samples < log2(100)) and low variance (IQR < median(IQR)) were excluded prior to the analysis.
To ensure that this non-specific filtering removed only uninformative probe sets, we examined the differential expression p-value distributions of the filtered and unfiltered probe sets.

## Sheet: Kim Invasive Up
ID	Symbol	Gene Title	Chromosome	logFC	AveExpr	adj.P.Val
ILMN_1775708	SLC2A3	Homo sapiens solute carrier family 2 (facilitated glucose transporter), member 3 (SLC2A3), mRNA.	12	-1.56554	10.2818	3.36738e-10
ILMN_1805200	DNM1	Homo sapiens dynamin 1 (DNM1), transcript variant 2, mRNA.	9	-0.769079	7.83442	3.37341e-10
ILMN_1690957	MT2A	Homo sapiens metallothionein 2A (MT2A), mRNA.	16	-1.76447	11.0466	3.5012e-10
ILMN_1651942	CDC25B	Homo sapiens cell division cycle 25 homolog B (S. pombe) (CDC25B), transcript variant 3, mRNA.	20	-0.949137	9.86412	4.06753e-10
ILMN_1697132	TUBB6	Homo sapiens tubulin, beta 6 (TUBB6), mRNA.	18	-1.28304	8.67988	5.6884e-10
ILMN_1725090	CTHRC1	Homo sapiens collagen triple helix repeat containing 1 (CTHRC1), mRNA.	8	-1.40946	9.02564	8.19508e-10
ILMN_1762319	SLC43A3	Homo sapiens solute carrier family 43, member 3 (SLC43A3), mRNA.	11	-0.61285	7.64679	1.53714e-09
ILMN_1682225	ADAM19	Homo sapiens ADAM metallopeptidase domain 19 (meltrin beta) (ADAM19), transcript variant 1, mRNA.	5	-1.01305	8.15406	1.53714e-09
ILMN_1769013	ASGR1	Homo sapiens asialoglycoprotein receptor 1 (ASGR1), mRNA.	17	-0.744702	8.34206	2.402e-09
ILMN_1741468	FAP	Homo sapiens fibroblast activation protein, alpha (FAP), mRNA.	2	-0.983091	7.75115	2.40425e-09
ILMN_1661197	CLCF1	Homo sapiens cardiotrophin-like cytokine factor 1 (CLCF1), mRNA.	11	-0.830537	8.29558	2.57116e-09
ILMN_1733937	MMD	Homo sapiens monocyte to macrophage differentiation-associated (MMD), mRNA.	17	-1.13204	9.18382	2.90449e-09
ILMN_1674706	MTHFD2	Homo sapiens methylenetetrahydrofolate dehydrogenase (NADP+ dependent) 2, methenyltetrahydrofolate cyclohydrolase (MTHFD2), nuclear gene encoding mitochondrial protein, transcript variant 1, mRNA.	2	-1.23111	9.35697	3.06202e-09
ILMN_1694213	PLEKHO1	Homo sapiens pleckstrin homology domain containing, family O member 1 (PLEKHO1), mRNA.	1	-1.02654	9.34709	3.06202e-09
ILMN_1655236	GFPT2	Homo sapiens glutamine-fructose-6-phosphate transaminase 2 (GFPT2), mRNA.	5	-1.26953	7.88364	4.25607e-09
ILMN_1757634	FAM20C	PREDICTED: Homo sapiens family with sequence similarity 20, member C (FAM20C), mRNA.	7	-0.648169	7.83103	4.39261e-09
ILMN_1729117	COL5A2	Homo sapiens collagen, type V, alpha 2 (COL5A2), mRNA.	2	-1.18244	10.137	5.67274e-09
ILMN_1658095	CYR61	Homo sapiens cysteine-rich, angiogenic inducer, 61 (CYR61), mRNA.	1	-1.37356	9.17176	7.01541e-09
ILMN_1656837	RBP1	Homo sapiens retinol binding protein 1, cellular (RBP1), mRNA.	3	-1.39648	9.31455	7.46508e-09
ILMN_1727194	CALU	Homo sapiens calumenin (CALU), mRNA.	7	-0.857676	10.3427	7.96204e-09
ILMN_1780058	DEGS1	Homo sapiens degenerative spermatocyte homolog 1, lipid desaturase (Drosophila) (DEGS1), transcript variant 2, mRNA.	1	-1.00227	9.8837	8.15048e-09
ILMN_1652631	C9orf19	Homo sapiens chromosome 9 open reading frame 19 (C9orf19), mRNA.	9	-1.19864	9.88273	9.39314e-09
ILMN_1737965	ELOVL4	Homo sapiens elongation of very long chain fatty acids (FEN1/Elo2, SUR4/Elo3, yeast)-like 4 (ELOVL4), mRNA.	6	-0.87254	7.83048	9.39314e-09
ILMN_1712112	DSCR1	Homo sapiens Down syndrome critical region gene 1 (DSCR1), transcript variant 3, mRNA.	21	-1.01468	9.96933	9.84108e-09
ILMN_1785732	TNFAIP6	Homo sapiens tumor necrosis factor, alpha-induced protein 6 (TNFAIP6), mRNA.	2	-0.901163	7.63794	1.14524e-08
ILMN_1809850	RCN3	Homo sapiens reticulocalbin 3, EF-hand calcium binding domain (RCN3), mRNA.	19	-0.808198	8.73242	1.15947e-08
ILMN_1872457		zh47e08.r1 Soares_fetal_liver_spleen_1NFLS_S1 Homo sapiens cDNA clone IMAGE:415238 5, mRNA sequence		-0.64699	7.79612	1.2246e-08
ILMN_1717056	TXNRD1	Homo sapiens thioredoxin reductase 1 (TXNRD1), transcript variant 1, mRNA.	12	-1.14096	9.33212	1.39693e-08
ILMN_1699829	CTGF	Homo sapiens connective tissue growth factor (CTGF), mRNA.	6	-1.67662	10.279	1.55759e-08
ILMN_1761281	LOC441019	PREDICTED: Homo sapiens hypothetical LOC441019 (LOC441019), mRNA.	4	-0.868791	7.62121	1.58568e-08
ILMN_1756049	NT5DC3	Homo sapiens 5'-nucleotidase domain containing 3 (NT5DC3), transcript variant 2, mRNA.	12	-0.714829	8.28152	1.62811e-08
ILMN_1707312	NFIL3	Homo sapiens nuclear factor, interleukin 3 regulated (NFIL3), mRNA.	9	-0.940479	9.10485	2.24937e-08
ILMN_1727639	IMPA2	Homo sapiens inositol(myo)-1(or 4)-monophosphatase 2 (IMPA2), mRNA.	18	-1.18727	9.63273	2.25096e-08
ILMN_1791728	SLC25A25	Homo sapiens solute carrier family 25 (mitochondrial carrier; phosphate carrier), member 25 (SLC25A25), nuclear gene encoding mitochondrial protein, transcript variant 4, mRNA.	9	-0.63336	8.70624	2.25096e-08
ILMN_1765557	OLFML2B	Homo sapiens olfactomedin-like 2B (OLFML2B), mRNA.	1	-0.747565	8.05576	2.51833e-08
ILMN_1698225	MYO5A	Homo sapiens myosin VA (heavy chain 12, myoxin) (MYO5A), mRNA.		-0.687297	8.34612	2.67073e-08
ILMN_1798892	ACTN1	Homo sapiens actinin, alpha 1 (ACTN1), mRNA.	14	-1.07602	11.4473	2.7151e-08
ILMN_1715508	NNMT	Homo sapiens nicotinamide N-methyltransferase (NNMT), mRNA.	11	-1.36374	8.73418	3.46401e-08
ILMN_1716265	PGM2L1	Homo sapiens phosphoglucomutase 2-like 1 (PGM2L1), mRNA.	11	-0.772045	7.94612	3.46401e-08
ILMN_1733675	MPP1	Homo sapiens membrane protein, palmitoylated 1, 55kDa (MPP1), mRNA.	X	-0.806163	8.22224	3.46401e-08
ILMN_1811238	HAK	Homo sapiens heart alpha-kinase (HAK), mRNA.	18	-0.727754	7.50958	3.49395e-08
ILMN_1784884	LILRB3	Homo sapiens leukocyte immunoglobulin-like receptor, subfamily B (with TM and ITIM domains), member 3 (LILRB3), transcript variant 1, mRNA.		-0.921394	7.95418	3.49395e-08
ILMN_1673073	WDR62	Homo sapiens WD repeat domain 62 (WDR62), mRNA.	19	-0.697872	7.91194	3.55523e-08
ILMN_1752520	SLFN11	Homo sapiens schlafen family member 11 (SLFN11), mRNA.	17	-1.07886	8.89976	3.74533e-08
ILMN_1736178	AEBP1	Homo sapiens AE binding protein 1 (AEBP1), mRNA.	7	-1.41016	9.67988	3.74533e-08
ILMN_1752947	C17orf79	Homo sapiens chromosome 17 open reading frame 79 (C17orf79), mRNA.	17	-0.855755	10.2876	4.38078e-08
ILMN_1670926	GALNAC4S-6ST	Homo sapiens B cell RAG associated protein (GALNAC4S-6ST), mRNA.	10	-1.15416	8.59533	4.56071e-08
ILMN_1691156	MT1A	Homo sapiens metallothionein 1A (MT1A), mRNA.	16	-1.32803	11.0207	4.93848e-08
ILMN_1781943	FAM83D	Homo sapiens family with sequence similarity 83, member D (FAM83D), mRNA.		-1.1084	8.59164	5.07462e-08
ILMN_1735355	BDKRB1	Homo sapiens bradykinin receptor B1 (BDKRB1), mRNA.	14	-0.640604	7.43333	5.7697e-08
ILMN_1701308	COL1A1	Homo sapiens collagen, type I, alpha 1 (COL1A1), mRNA.		-1.28631	11.158	6.3111e-08
ILMN_1755173	PLEKHA4	Homo sapiens pleckstrin homology domain containing, family A (phosphoinositide binding specific) member 4 (PLEKHA4), mRNA.	19	-1.09778	8.64988	6.40201e-08
ILMN_1720048	CCL2	Homo sapiens chemokine (C-C motif) ligand 2 (CCL2), mRNA.	17	-1.19154	8.76103	6.56135e-08
ILMN_1765860	DOCK11	Homo sapiens dedicator of cytokinesis 11 (DOCK11), mRNA.	X	-0.861246	8.14721	6.71573e-08
ILMN_1651832	EHD1	Homo sapiens EH-domain containing 1 (EHD1), mRNA.	11	-0.70735	11.5572	7.26916e-08
ILMN_1749078	TIMP2	Homo sapiens TIMP metallopeptidase inhibitor 2 (TIMP2), mRNA.	17	-1.08362	9.53533	7.26916e-08
ILMN_1672908	TWIST1	Homo sapiens twist homolog 1 (acrocephalosyndactyly 3; Saethre-Chotzen syndrome) (Drosophila) (TWIST1), mRNA.	7	-0.889609	7.70564	8.32081e-08
ILMN_1666546	DUSP14	Homo sapiens dual specificity phosphatase 14 (DUSP14), mRNA.	17	-0.638043	9.33655	8.32081e-08
ILMN_1801584	CXCR4	Homo sapiens chemokine (C-X-C motif) receptor 4 (CXCR4), transcript variant 2, mRNA.	2	-0.931348	9.022	8.32081e-08
ILMN_1655595	SERPINE2	Homo sapiens serpin peptidase inhibitor, clade E (nexin, plasminogen activator inhibitor type 1), member 2 (SERPINE2), mRNA.	2	-1.44812	9.73618	8.36446e-08
ILMN_1770787	DDAH2	Homo sapiens dimethylarginine dimethylaminohydrolase 2 (DDAH2), mRNA.	6	-0.797662	9.33448	8.48319e-08
ILMN_1772964	CCL8	Homo sapiens chemokine (C-C motif) ligand 8 (CCL8), mRNA.	17	-1.14609	8.7323	1.01316e-07
ILMN_1701643	GDPD5	Homo sapiens glycerophosphodiester phosphodiesterase domain containing 5 (GDPD5), mRNA.	11	-0.748882	8.528	1.11583e-07
ILMN_1811851	PRRX1	Homo sapiens paired related homeobox 1 (PRRX1), transcript variant pmx-1a, mRNA.	1	-0.750052	7.83582	1.24627e-07
ILMN_1754969	LMCD1	Homo sapiens LIM and cysteine-rich domains 1 (LMCD1), mRNA.	3	-1.0265	9.15212	1.35187e-07
ILMN_1724533	LY96	Homo sapiens lymphocyte antigen 96 (LY96), mRNA.	8	-0.960205	8.99721	1.37359e-07
ILMN_1726805	STX2	Homo sapiens syntaxin 2 (STX2), transcript variant 2, mRNA.	12	-0.658916	7.98352	1.41777e-07
ILMN_1790052	MMP23A	Homo sapiens matrix metallopeptidase 23A (MMP23A), mRNA.	1	-0.850238	8.1157	1.41777e-07
ILMN_1730487	CALD1	Homo sapiens caldesmon 1 (CALD1), transcript variant 5, mRNA.	7	-1.54968	10.1218	1.41777e-07
ILMN_1691508	PLAUR	Homo sapiens plasminogen activator, urokinase receptor (PLAUR), transcript variant 2, mRNA.	19	-0.712828	8.31115	1.41777e-07
ILMN_1743199	EGR2	Homo sapiens early growth response 2 (Krox-20 homolog, Drosophila) (EGR2), mRNA.	10	-0.906928	7.85321	1.41777e-07
ILMN_1792455	TMEM158	Homo sapiens transmembrane protein 158 (TMEM158), mRNA.		-1.35648	10.15	1.47763e-07
ILMN_1791346	ATF3	Homo sapiens activating transcription factor 3 (ATF3), transcript variant 2, mRNA.		-1.55707	9.22333	1.51451e-07
ILMN_1714784	ZAK	Homo sapiens sterile alpha motif and leucine zipper containing kinase AZK (ZAK), transcript variant 1, mRNA.	2	-0.955886	8.57442	1.62723e-07
ILMN_1782439	CNN3	Homo sapiens calponin 3, acidic (CNN3), mRNA.	1	-0.850424	11.908	1.91324e-07
ILMN_1672105	TSPAN4	Homo sapiens tetraspanin 4 (TSPAN4), transcript variant 1, mRNA.	11	-0.630362	9.10473	2.0011e-07
ILMN_1680874	TUBB2B	Homo sapiens tubulin, beta 2B (TUBB2B), mRNA.	6	-1.46206	8.21958	2.09514e-07
ILMN_1807969	SNCAIP	Homo sapiens synuclein, alpha interacting protein (synphilin) (SNCAIP), mRNA.	5	-1.11515	8.55388	2.10215e-07
ILMN_1805410	C15orf48	Homo sapiens chromosome 15 open reading frame 48 (C15orf48), transcript variant 2, mRNA.	15	-1.33796	8.5943	2.32803e-07
ILMN_1757552	PTRF	Homo sapiens polymerase I and transcript release factor (PTRF), mRNA.	17	-1.25506	11.9027	2.3922e-07
ILMN_1801583	ASPN	Homo sapiens asporin (ASPN), mRNA.	9	-0.830276	8.27655	2.6097e-07
ILMN_1757387	UCHL1	Homo sapiens ubiquitin carboxyl-terminal esterase L1 (ubiquitin thiolesterase) (UCHL1), mRNA.	4	-1.28981	8.11339	2.6097e-07
ILMN_1776577	DCC1	Homo sapiens defective in sister chromatid cohesion homolog 1 (S. cerevisiae) (DCC1), mRNA.	8	-0.698479	8.41382	2.76239e-07
ILMN_1722622	CD163	Homo sapiens CD163 molecule (CD163), transcript variant 2, mRNA.	12	-0.801625	7.80733	2.84011e-07
ILMN_1812995	CTSL1	Homo sapiens cathepsin L1 (CTSL1), transcript variant 1, mRNA.		-0.953043	10.1949	2.86123e-07
ILMN_1674620	SGCE	Homo sapiens sarcoglycan, epsilon (SGCE), mRNA.	7	-1.10346	8.65327	2.86123e-07
ILMN_1719759	TNC	Homo sapiens tenascin C (hexabrachion) (TNC), mRNA.	9	-1.12371	8.28127	2.93865e-07
ILMN_1666057	REEP2	Homo sapiens receptor accessory protein 2 (REEP2), mRNA.	5	-0.707869	7.55667	3.07164e-07
ILMN_1751489	ADAMTS4	Homo sapiens ADAM metallopeptidase with thrombospondin type 1 motif, 4 (ADAMTS4), mRNA.	1	-1.15033	8.34079	3.10544e-07
ILMN_1715401	MT1G	Homo sapiens metallothionein 1G (MT1G), mRNA.	16	-1.291	8.67539	3.16092e-07
ILMN_1783285	CTPS	Homo sapiens CTP synthase (CTPS), mRNA.	1	-0.791687	10.2247	3.21237e-07
ILMN_1792679	ITGA5	Homo sapiens integrin, alpha 5 (fibronectin receptor, alpha polypeptide) (ITGA5), mRNA.	12	-1.20585	10.04	3.3789e-07
ILMN_1651429	SELM	Homo sapiens selenoprotein M (SELM), mRNA.	22	-1.26985	9.87424	3.53688e-07
ILMN_1702363	SULF1	Homo sapiens sulfatase 1 (SULF1), mRNA.	8	-1.03364	8.04024	3.61856e-07
ILMN_1723287	SLC6A16	Homo sapiens solute carrier family 6, member 16 (SLC6A16), mRNA.	19	-0.716629	7.79442	4.61334e-07
ILMN_1656011	RGS1	Homo sapiens regulator of G-protein signalling 1 (RGS1), mRNA.	1	-1.34001	8.62061	4.62697e-07
ILMN_1682717	IER3	Homo sapiens immediate early response 3 (IER3), mRNA.		-1.1332	11.2931	4.90398e-07
ILMN_1764788	TNFRSF1B	Homo sapiens tumor necrosis factor receptor superfamily, member 1B (TNFRSF1B), mRNA.	1	-0.85011	9.64545	5.10047e-07
ILMN_1789733	CLIP3	Homo sapiens CAP-GLY domain containing linker protein 3 (CLIP3), mRNA.	19	-1.07783	9.46782	5.20079e-07
ILMN_1706505	COL5A1	Homo sapiens collagen, type V, alpha 1 (COL5A1), mRNA.	9	-1.05649	10.3339	5.50878e-07
ILMN_1801766	CCDC109B	Homo sapiens coiled-coil domain containing 109B (CCDC109B), mRNA.	4	-1.03914	9.58745	5.50878e-07
ILMN_1680649	CIT	Homo sapiens citron (rho-interacting, serine/threonine kinase 21) (CIT), mRNA.	12	-0.657637	8.74964	5.79393e-07
ILMN_1741632	RAB3IL1	Homo sapiens RAB3A interacting protein (rabin3)-like 1 (RAB3IL1), mRNA.	11	-0.775672	8.58321	5.79393e-07
ILMN_1671875	CLIC4	Homo sapiens chloride intracellular channel 4 (CLIC4), mRNA.	1	-0.854247	7.93448	5.86014e-07
ILMN_1713901	KDELR3	Homo sapiens KDEL (Lys-Asp-Glu-Leu) endoplasmic reticulum protein retention receptor 3 (KDELR3), transcript variant 2, mRNA.	22	-0.811842	8.32418	5.87288e-07
ILMN_1728512	YWHAH	Homo sapiens tyrosine 3-monooxygenase/tryptophan 5-monooxygenase activation protein, eta polypeptide (YWHAH), mRNA.	22	-0.674003	12.9025	5.98774e-07
ILMN_1682781	TEAD2	Homo sapiens TEA domain family member 2 (TEAD2), mRNA.	19	-1.23132	9.72442	6.06679e-07
ILMN_1795762	PLEK	Homo sapiens pleckstrin (PLEK), mRNA.	2	-0.900147	8.54261	6.2628e-07
ILMN_1702691	TNFAIP3	Homo sapiens tumor necrosis factor, alpha-induced protein 3 (TNFAIP3), mRNA.	6	-0.90397	9.60909	7.301e-07
ILMN_1727043	GLT25D1	Homo sapiens glycosyltransferase 25 domain containing 1 (GLT25D1), mRNA.	19	-0.62339	11.5033	7.39769e-07
ILMN_1729801	S100A8	Homo sapiens S100 calcium binding protein A8 (S100A8), mRNA.	1	-2.07954	10.3051	7.39769e-07
ILMN_1660871	NEK6	Homo sapiens NIMA (never in mitosis gene a)-related kinase 6 (NEK6), mRNA.	9	-0.752845	8.43085	7.82369e-07
ILMN_1797236	TGM2	Homo sapiens transglutaminase 2 (C polypeptide, protein-glutamine-gamma-glutamyltransferase) (TGM2), transcript variant 2, mRNA.	20	-1.01017	8.8057	7.84376e-07
ILMN_1775728	SFRP1	Homo sapiens secreted frizzled-related protein 1 (SFRP1), mRNA.	8	-1.20147	7.83709	8.22915e-07
ILMN_1744403	KCNIP3	Homo sapiens Kv channel interacting protein 3, calsenilin (KCNIP3), transcript variant 1, mRNA.	2	-0.676253	7.49576	8.25355e-07
ILMN_1833858		Homo sapiens clone 23700 mRNA sequence		-0.770972	7.54824	8.4857e-07
ILMN_1738578	FILIP1L	Homo sapiens filamin A interacting protein 1-like (FILIP1L), transcript variant 2, mRNA.		-0.985462	8.15709	9.04561e-07
ILMN_1699651	IL6	Homo sapiens interleukin 6 (interferon, beta 2) (IL6), mRNA.	7	-0.841257	7.5763	9.26381e-07
ILMN_1673609	ISLR	Homo sapiens immunoglobulin superfamily containing leucine-rich repeat (ISLR), transcript variant 1, mRNA.	15	-0.65339	7.58455	9.65952e-07
ILMN_1810191	PLA2G4C	Homo sapiens phospholipase A2, group IVC (cytosolic, calcium-independent) (PLA2G4C), mRNA.	19	-0.895194	8.61618	9.75382e-07
ILMN_1771827	AIF1	Homo sapiens allograft inflammatory factor 1 (AIF1), transcript variant 2, mRNA.	6	-0.855013	8.71739	1.02155e-06
ILMN_1702255	KCNT1	Homo sapiens potassium channel, subfamily T, member 1 (KCNT1), mRNA.	9	-0.62783	7.28873	1.02155e-06
ILMN_1682099	TNFAIP8L3	Homo sapiens tumor necrosis factor, alpha-induced protein 8-like 3 (TNFAIP8L3), mRNA.	15	-0.750236	7.90861	1.05844e-06
ILMN_1781001	SOCS3	Homo sapiens suppressor of cytokine signaling 3 (SOCS3), mRNA.	17	-0.676696	7.92855	1.05858e-06
ILMN_1730201	DTNA	Homo sapiens dystrobrevin, alpha (DTNA), transcript variant 7, mRNA.	18	-0.604579	7.57776	1.08203e-06
ILMN_1735779	KCNJ8	Homo sapiens potassium inwardly-rectifying channel, subfamily J, member 8 (KCNJ8), mRNA.	12	-0.622707	7.67467	1.08773e-06
ILMN_1723522	APOLD1	Homo sapiens apolipoprotein L domain containing 1 (APOLD1), mRNA.	12	-0.837545	8.33588	1.21569e-06
ILMN_1798706	EBI2	Homo sapiens Epstein-Barr virus induced gene 2 (lymphocyte-specific G protein-coupled receptor) (EBI2), mRNA.	13	-0.742011	7.72552	1.35038e-06
ILMN_1680738	C5orf13	Homo sapiens chromosome 5 open reading frame 13 (C5orf13), mRNA.	5	-0.968639	9.88582	1.47073e-06
ILMN_1669768	JUN	Homo sapiens jun oncogene (JUN), mRNA.	1	-0.684684	8.16533	1.53551e-06
ILMN_1711988	KCNK12	Homo sapiens potassium channel, subfamily K, member 12 (KCNK12), mRNA.	2	-0.643681	7.65061	1.54166e-06
ILMN_1773855	CPT1C	Homo sapiens carnitine palmitoyltransferase 1C (CPT1C), mRNA.	19	-0.798226	8.43994	1.54166e-06
ILMN_1803686	ADA	Homo sapiens adenosine deaminase (ADA), mRNA.	20	-0.852748	8.97848	1.54938e-06
ILMN_1786257	SNX10	Homo sapiens sorting nexin 10 (SNX10), mRNA.	7	-0.866256	9.10618	1.55187e-06
ILMN_1673026	CHCHD3	Homo sapiens coiled-coil-helix-coiled-coil-helix domain containing 3 (CHCHD3), mRNA.	7	-0.652014	9.02073	1.55187e-06
ILMN_1747366	LOC387763	PREDICTED: Homo sapiens hypothetical LOC387763 (LOC387763), mRNA.		-1.18233	9.03097	1.55403e-06
ILMN_1652650	SH3KBP1	Homo sapiens SH3-domain kinase binding protein 1 (SH3KBP1), transcript variant 2, mRNA.	X	-0.803581	9.70176	1.57224e-06
ILMN_1665583	TUBB	Homo sapiens tubulin, beta (TUBB), mRNA.	6	-0.845907	10.1668	1.58386e-06
ILMN_1749436	RASSF2	Homo sapiens Ras association (RalGDS/AF-6) domain family 2 (RASSF2), transcript variant 1, mRNA.	20	-0.770404	8.58424	1.59468e-06
ILMN_1706783	TAGLN	Homo sapiens transgelin (TAGLN), transcript variant 1, mRNA.	11	-1.30367	11.5025	1.6749e-06
ILMN_1727624	PIM2	Homo sapiens pim-2 oncogene (PIM2), mRNA.	X	-0.636625	8.76533	1.72012e-06
ILMN_1740015	CD14	Homo sapiens CD14 molecule (CD14), transcript variant 1, mRNA.	5	-0.987664	9.17539	1.7948e-06
ILMN_1785646	PMP22	Homo sapiens peripheral myelin protein 22 (PMP22), transcript variant 3, mRNA.	17	-1.12381	9.18976	1.82845e-06
ILMN_1766169	BCAT1	Homo sapiens branched chain aminotransferase 1, cytosolic (BCAT1), mRNA.	12	-0.918542	8.36709	1.84446e-06
ILMN_1651950	TPST1	Homo sapiens tyrosylprotein sulfotransferase 1 (TPST1), mRNA.	7	-0.757931	8.98606	1.90605e-06
ILMN_1698732	PALLD	Homo sapiens palladin, cytoskeletal associated protein (PALLD), mRNA.	4	-1.22488	10.3586	1.92752e-06
ILMN_1675345	MYADM	Homo sapiens myeloid-associated differentiation marker (MYADM), transcript variant 5, mRNA.	19	-0.858226	9.05248	1.93902e-06
ILMN_1703531	EDG3	Homo sapiens endothelial differentiation, sphingolipid G-protein-coupled receptor, 3 (EDG3), mRNA.	9	-0.774389	8.1903	1.96179e-06
ILMN_1672503	DPYSL2	Homo sapiens dihydropyrimidinase-like 2 (DPYSL2), mRNA.	8	-0.929969	10.7092	2.01425e-06
ILMN_1765446	EMP3	Homo sapiens epithelial membrane protein 3 (EMP3), mRNA.	19	-1.00401	9.28503	2.08033e-06
ILMN_1792922	SOD2	Homo sapiens superoxide dismutase 2, mitochondrial (SOD2), nuclear gene encoding mitochondrial protein, transcript variant 1, mRNA.	6	-0.76221	9.43145	2.09041e-06
ILMN_1708059	USP13	Homo sapiens ubiquitin specific peptidase 13 (isopeptidase T-3) (USP13), mRNA.	3	-0.607307	8.78315	2.09041e-06
ILMN_1766411	AP1S2	Homo sapiens adaptor-related protein complex 1, sigma 2 subunit (AP1S2), mRNA.	X	-0.796117	8.83303	2.14971e-06
ILMN_1770850	PNMA1	Homo sapiens paraneoplastic antigen MA1 (PNMA1), mRNA.	14	-0.676683	8.24242	2.15115e-06
ILMN_1740250	NMU	Homo sapiens neuromedin U (NMU), mRNA.	4	-1.12427	8.35964	2.16328e-06
ILMN_1719178	ACOT7	Homo sapiens acyl-CoA thioesterase 7 (ACOT7), transcript variant hBACHb, mRNA.	1	-0.628157	9.33739	2.17351e-06
ILMN_1651611	LDLR	Homo sapiens low density lipoprotein receptor (familial hypercholesterolemia) (LDLR), mRNA.	19	-0.987679	10.4105	2.19519e-06
ILMN_1742350	CRIP1	Homo sapiens cysteine-rich protein 1 (intestinal) (CRIP1), mRNA.	14	-1.15367	11.6066	2.24627e-06
ILMN_1813338	LAG3	Homo sapiens lymphocyte-activation gene 3 (LAG3), mRNA.	12	-0.707773	7.97624	2.31466e-06
ILMN_1666733	IL8	Homo sapiens interleukin 8 (IL8), mRNA.	4	-1.45414	8.55339	2.32085e-06
ILMN_1765641	SEMA3A	Homo sapiens sema domain, immunoglobulin domain (Ig), short basic domain, secreted, (semaphorin) 3A (SEMA3A), mRNA.		-0.631946	7.55406	2.38769e-06
ILMN_1729311	LOH3CR2A	Homo sapiens loss of heterozygosity, 3, chromosomal region 2, gene A (LOH3CR2A), mRNA.	3	-0.690189	8.05061	2.40489e-06
ILMN_1666503	DENND2A	Homo sapiens DENN/MADD domain containing 2A (DENND2A), mRNA.	7	-0.894607	9.548	2.57763e-06
ILMN_1666305	CDKN3	Homo sapiens cyclin-dependent kinase inhibitor 3 (CDK2-associated dual specificity phosphatase) (CDKN3), mRNA.	14	-0.823086	8.54248	2.65117e-06
ILMN_1689378	CCRN4L	Homo sapiens CCR4 carbon catabolite repression 4-like (S. cerevisiae) (CCRN4L), mRNA.	4	-0.66748	8.57188	2.74649e-06
ILMN_1682928	CPVL	Homo sapiens carboxypeptidase, vitellogenic-like (CPVL), transcript variant 2, mRNA.	7	-0.788774	8.38648	2.80726e-06
ILMN_1667295	VASN	Homo sapiens vasorin (VASN), mRNA.	16	-0.825976	9.71794	2.85125e-06
ILMN_1657435	MT1M	Homo sapiens metallothionein 1M (MT1M), mRNA.		-0.778805	7.60303	2.85306e-06
ILMN_1763891	FLJ35258	Homo sapiens hypothetical protein 284297 (FLJ35258), mRNA.	19	-0.827621	8.02836	2.85553e-06
ILMN_1677092	GEM	Homo sapiens GTP binding protein overexpressed in skeletal muscle (GEM), transcript variant 1, mRNA.	8	-0.613772	7.56121	3.25879e-06
ILMN_1784459	MMP3	Homo sapiens matrix metallopeptidase 3 (stromelysin 1, progelatinase) (MMP3), mRNA.	11	-1.02189	8.07709	3.38146e-06
ILMN_1745954	CORO1C	Homo sapiens coronin, actin binding protein, 1C (CORO1C), mRNA.	12	-0.698661	10.5576	3.44683e-06
ILMN_1733415	MFAP5	Homo sapiens microfibrillar associated protein 5 (MFAP5), mRNA.	12	-0.783937	7.35418	3.73623e-06
ILMN_1711514	COCH	Homo sapiens coagulation factor C homolog, cochlin (Limulus polyphemus) (COCH), mRNA.	14	-0.87835	8.1817	3.81713e-06
ILMN_1752046	SH2B3	Homo sapiens SH2B adaptor protein 3 (SH2B3), mRNA.	12	-0.735709	9.09655	3.83121e-06
ILMN_1806733	COL18A1	Homo sapiens collagen, type XVIII, alpha 1 (COL18A1), transcript variant 1, mRNA.		-0.802385	9.25218	3.87613e-06
ILMN_1790338	PRRX2	Homo sapiens paired related homeobox 2 (PRRX2), mRNA.	9	-0.721879	8.69873	3.90618e-06
ILMN_1758895	CTSK	Homo sapiens cathepsin K (CTSK), mRNA.	1	-0.795017	9.74339	4.11823e-06
ILMN_1718977	GADD45B	Homo sapiens growth arrest and DNA-damage-inducible, beta (GADD45B), mRNA.	19	-0.826707	9.35152	4.27459e-06
ILMN_1773079	COL3A1	Homo sapiens collagen, type III, alpha 1 (Ehlers-Danlos syndrome type IV, autosomal dominant) (COL3A1), mRNA.		-1.0952	11.0894	4.38068e-06
ILMN_1789954	SYT11	Homo sapiens synaptotagmin XI (SYT11), mRNA.	1	-0.703415	8.53558	4.63326e-06
ILMN_1776674	SAC3D1	Homo sapiens SAC3 domain containing 1 (SAC3D1), mRNA.	11	-0.611138	10.2667	4.70792e-06
ILMN_1654324	HEYL	Homo sapiens hairy/enhancer-of-split related with YRPW motif-like (HEYL), mRNA.		-0.730251	9.15673	5.14002e-06
ILMN_1736042	ME1	Homo sapiens malic enzyme 1, NADP(+)-dependent, cytosolic (ME1), mRNA.		-0.626547	8.19582	5.15754e-06
ILMN_1791726	TUBB3	Homo sapiens tubulin, beta 3 (TUBB3), mRNA.	16	-1.30933	9.25073	5.17841e-06
ILMN_1768812	FXYD6	Homo sapiens FXYD domain containing ion transport regulator 6 (FXYD6), mRNA.	11	-0.956802	7.64079	5.19846e-06
ILMN_1667371	SLA	Homo sapiens Src-like-adaptor (SLA), mRNA.	8	-0.730822	8.25976	5.19846e-06
ILMN_1808011	FAM46B	Homo sapiens family with sequence similarity 46, member B (FAM46B), mRNA.	1	-0.878102	7.7883	5.25071e-06
ILMN_1789627	GP1BB	Homo sapiens glycoprotein Ib (platelet), beta polypeptide (GP1BB), mRNA.	22	-0.984029	10.1107	5.49659e-06
ILMN_1782938	SLC16A10	Homo sapiens solute carrier family 16, member 10 (aromatic amino acid transporter) (SLC16A10), mRNA.	6	-0.750337	7.77758	5.56137e-06
ILMN_1664843	FPR1	Homo sapiens formyl peptide receptor 1 (FPR1), mRNA.	19	-0.68388	8.64406	5.56137e-06
ILMN_1722824	TEAD4	Homo sapiens TEA domain family member 4 (TEAD4), transcript variant 3, mRNA.	12	-0.615868	8.42248	5.85564e-06
ILMN_1677603	C1S	Homo sapiens complement component 1, s subcomponent (C1S), transcript variant 2, mRNA.	12	-0.982584	8.92824	5.92477e-06
ILMN_1779875	THY1	Homo sapiens Thy-1 cell surface antigen (THY1), mRNA.	11	-0.892228	10.2245	6.02433e-06
ILMN_1715748	FLNC	Homo sapiens filamin C, gamma (actin binding protein 280) (FLNC), mRNA.		-1.59452	9.48915	6.11996e-06
ILMN_1706643	COL6A3	Homo sapiens collagen, type VI, alpha 3 (COL6A3), transcript variant 3, mRNA.	2	-1.10469	10.9898	6.13087e-06
ILMN_1731745	NINJ2	Homo sapiens ninjurin 2 (NINJ2), mRNA.	12	-0.640407	8.37442	6.60091e-06
ILMN_1763487	CTLA4	Homo sapiens cytotoxic T-lymphocyte-associated protein 4 (CTLA4), transcript variant 2, mRNA.	2	-0.606992	8.32061	6.77538e-06
ILMN_1690397	DYNC1I1	Homo sapiens dynein, cytoplasmic 1, intermediate chain 1 (DYNC1I1), mRNA.	7	-0.94516	8.24564	6.9458e-06
ILMN_1756777	HBEGF	Homo sapiens heparin-binding EGF-like growth factor (HBEGF), mRNA.	5	-0.762399	8.09279	6.94705e-06
ILMN_1668675	PAPSS2	Homo sapiens 3'-phosphoadenosine 5'-phosphosulfate synthase 2 (PAPSS2), transcript variant 2, mRNA.	10	-0.78324	8.70994	7.14529e-06
ILMN_1715426	FSTL1	Homo sapiens follistatin-like 1 (FSTL1), mRNA.	3	-0.848614	11.9185	7.15943e-06
ILMN_1778444	FKBP5	Homo sapiens FK506 binding protein 5 (FKBP5), mRNA.	6	-0.626137	8.70285	7.25235e-06
ILMN_1793474	INSIG1	Homo sapiens insulin induced gene 1 (INSIG1), transcript variant 3, mRNA.	7	-0.774753	8.55782	7.69222e-06
ILMN_1793476	PRKCDBP	Homo sapiens protein kinase C, delta binding protein (PRKCDBP), mRNA.	11	-0.904231	9.21812	7.99703e-06
ILMN_1791392	SHROOM3	Homo sapiens shroom family member 3 (SHROOM3), mRNA.		-0.788378	8.07915	8.29416e-06
ILMN_1798270	C11orf75	Homo sapiens chromosome 11 open reading frame 75 (C11orf75), mRNA.	11	-0.839668	9.37842	8.51136e-06
ILMN_1682636	CXCL2	Homo sapiens chemokine (C-X-C motif) ligand 2 (CXCL2), mRNA.	4	-0.696414	7.19333	8.88905e-06
ILMN_1801377	SLC29A4	Homo sapiens solute carrier family 29 (nucleoside transporters), member 4 (SLC29A4), mRNA.	7	-0.897332	8.80436	9.23505e-06
ILMN_1801257	CENPA	Homo sapiens centromere protein A (CENPA), transcript variant 1, mRNA.		-0.86254	8.14673	9.46345e-06
ILMN_1732967	KIAA1949	PREDICTED: Homo sapiens KIAA1949, transcript variant 10 (KIAA1949), mRNA.		-0.60259	9.76352	9.92375e-06
ILMN_1754894	C1orf162	Homo sapiens chromosome 1 open reading frame 162 (C1orf162), mRNA.	1	-0.680656	9.66236	1.01599e-05
ILMN_1763907	C6orf173	Homo sapiens chromosome 6 open reading frame 173 (C6orf173), mRNA.	6	-0.688218	8.75103	1.06019e-05
ILMN_1710974	RGS2	Homo sapiens regulator of G-protein signalling 2, 24kDa (RGS2), mRNA.	1	-1.17085	8.88491	1.0955e-05
ILMN_1824666		Homo sapiens mRNA; cDNA DKFZp667A182 (from clone DKFZp667A182)		-0.618071	7.9303	1.13908e-05
ILMN_1795442	LAMA4	Homo sapiens laminin, alpha 4 (LAMA4), mRNA.	6	-0.825413	8.762	1.15076e-05
ILMN_1753464	C17orf53	Homo sapiens chromosome 17 open reading frame 53 (C17orf53), mRNA.	17	-0.703811	9.25291	1.15555e-05
ILMN_1766657	STOM	Homo sapiens stomatin (STOM), transcript variant 2, mRNA.	9	-0.736785	10.6935	1.15794e-05
ILMN_1653028	COL4A1	Homo sapiens collagen, type IV, alpha 1 (COL4A1), mRNA.	13	-0.891514	12.2456	1.18843e-05
ILMN_1768940	COL15A1	Homo sapiens collagen, type XV, alpha 1 (COL15A1), mRNA.		-0.793772	8.53885	1.18843e-05
ILMN_1800738	E2F1	Homo sapiens E2F transcription factor 1 (E2F1), mRNA.	20	-0.714558	8.36539	1.20926e-05
ILMN_1654268	HMGB2	Homo sapiens high-mobility group box 2 (HMGB2), mRNA.	4	-0.851804	9.39085	1.24305e-05
ILMN_1814194	TCF4	Homo sapiens transcription factor 4 (TCF4), mRNA.	18	-0.712634	9.60127	1.2707e-05
ILMN_1674160	BIN1	Homo sapiens bridging integrator 1 (BIN1), transcript variant 6, mRNA.	2	-1.01709	9.25364	1.33934e-05
ILMN_1794598	SCHIP1	Homo sapiens schwannomin interacting protein 1 (SCHIP1), mRNA.	3	-0.629231	8.08479	1.38703e-05
ILMN_1682737	CHRDL2	Homo sapiens chordin-like 2 (CHRDL2), mRNA.	11	-0.639241	7.13564	1.38703e-05
ILMN_1775170	MT1X	Homo sapiens metallothionein 1X (MT1X), mRNA.	16	-1.03473	10.0323	1.38703e-05
ILMN_1669550	MAD2L2	Homo sapiens MAD2 mitotic arrest deficient-like 2 (yeast) (MAD2L2), mRNA.	1	-0.675481	10.9048	1.3906e-05
ILMN_1723978	LGALS1	Homo sapiens lectin, galactoside-binding, soluble, 1 (galectin 1) (LGALS1), mRNA.	22	-1.06739	12.4198	1.40872e-05
ILMN_1670134	FADS1	Homo sapiens fatty acid desaturase 1 (FADS1), mRNA.	11	-0.893489	8.99418	1.42301e-05
ILMN_1760027	WAS	Homo sapiens Wiskott-Aldrich syndrome (eczema-thrombocytopenia) (WAS), mRNA.	X	-0.611569	8.84339	1.47216e-05
ILMN_1808238	RBPMS2	Homo sapiens RNA binding protein with multiple splicing 2 (RBPMS2), mRNA.	15	-1.18747	9.62921	1.49135e-05
ILMN_1722898	SFRP2	Homo sapiens secreted frizzled-related protein 2 (SFRP2), mRNA.	4	-1.03781	7.60958	1.5956e-05
ILMN_1687301	VCAN	Homo sapiens versican (VCAN), mRNA.	5	-0.987919	9.56636	1.59925e-05
ILMN_1762899	EGR1	Homo sapiens early growth response 1 (EGR1), mRNA.	5	-1.22459	10.8468	1.6512e-05
ILMN_1695290	PLEKHC1	Homo sapiens pleckstrin homology domain containing, family C (with FERM domain) member 1 (PLEKHC1), mRNA.	14	-0.952308	10.2923	1.67426e-05
ILMN_1718663	LCP2	Homo sapiens lymphocyte cytosolic protein 2 (SH2 domain containing leukocyte protein of 76kDa) (LCP2), mRNA.	5	-0.689413	8.47109	1.67426e-05
ILMN_1806165	HSPA6	Homo sapiens heat shock 70kDa protein 6 (HSP70B') (HSPA6), mRNA.	1	-0.848198	9.60745	1.75322e-05
ILMN_1811779	MGC24103	PREDICTED: Homo sapiens hypothetical protein MGC24103 (MGC24103), misc RNA.	9	-0.966032	8.30309	1.8925e-05
ILMN_1673639	ABI3BP	Homo sapiens ABI gene family, member 3 (NESH) binding protein (ABI3BP), mRNA.	3	-0.757061	8.01564	2.10652e-05
ILMN_1693014	CEBPB	Homo sapiens CCAAT/enhancer binding protein (C/EBP), beta (CEBPB), mRNA.	20	-0.646392	12.8513	2.22034e-05
ILMN_1694913	LMO3	Homo sapiens LIM domain only 3 (rhombotin-like 2) (LMO3), transcript variant 2, mRNA.	12	-0.83941	7.80842	2.24608e-05
ILMN_1695382	TSC22D3	Homo sapiens TSC22 domain family, member 3 (TSC22D3), transcript variant 3, mRNA.	X	-0.703317	9.79612	2.31343e-05
ILMN_1694426	ROR2	Homo sapiens receptor tyrosine kinase-like orphan receptor 2 (ROR2), mRNA.	9	-0.843766	8.07958	2.33466e-05
ILMN_1733226	ANKRD25	Homo sapiens ankyrin repeat domain 25 (ANKRD25), mRNA.	19	-0.756456	9.64279	2.36569e-05
ILMN_1752965	GREM1	Homo sapiens gremlin 1, cysteine knot superfamily, homolog (Xenopus laevis) (GREM1), mRNA.	15	-0.664516	7.6997	2.49631e-05
ILMN_1671928	PROS1	Homo sapiens protein S (alpha) (PROS1), mRNA.	3	-0.718163	8.98927	2.5086e-05
ILMN_1673363	CD97	Homo sapiens CD97 molecule (CD97), transcript variant 3, mRNA.	19	-0.713669	10.0008	2.70899e-05
ILMN_1715787	TPM1	Homo sapiens tropomyosin 1 (alpha) (TPM1), transcript variant 6, mRNA.	15	-1.02358	9.43636	2.70899e-05
ILMN_1742145	ESPL1	Homo sapiens extra spindle pole bodies homolog 1 (S. cerevisiae) (ESPL1), mRNA.	12	-0.610268	8.3363	2.73454e-05
ILMN_1683450	CDCA5	Homo sapiens cell division cycle associated 5 (CDCA5), mRNA.	11	-1.05023	9.81473	2.80139e-05
ILMN_1657181	C1QA	Homo sapiens complement component 1, q subcomponent, A chain (C1QA), mRNA.	1	-1.04329	10.2936	2.83385e-05
ILMN_1729216	CRYAB	Homo sapiens crystallin, alpha B (CRYAB), mRNA.	11	-1.12499	8.62564	2.91069e-05
ILMN_1677765	LRP8	Homo sapiens low density lipoprotein receptor-related protein 8, apolipoprotein e receptor (LRP8), transcript variant 2, mRNA.	1	-0.647064	8.08333	2.92636e-05
ILMN_1667966	C1orf24	Homo sapiens chromosome 1 open reading frame 24 (C1orf24), transcript variant 2, mRNA.	1	-1.0658	9.85339	2.95373e-05
ILMN_1790992	FLJ20105	Homo sapiens FLJ20105 protein (FLJ20105), transcript variant 2, mRNA.	X	-0.714089	8.26085	2.95776e-05
ILMN_1772366	MAP1A	Homo sapiens microtubule-associated protein 1A (MAP1A), mRNA.		-0.642408	7.99479	3.0613e-05
ILMN_1736441	PDXP	Homo sapiens pyridoxal (pyridoxine, vitamin B6) phosphatase (PDXP), mRNA.	22	-0.616691	9.55745	3.10083e-05
ILMN_1797728	HMGCS1	Homo sapiens 3-hydroxy-3-methylglutaryl-Coenzyme A synthase 1 (soluble) (HMGCS1), mRNA.	5	-0.657523	11.515	3.11093e-05
ILMN_1772910	GAS1	Homo sapiens growth arrest-specific 1 (GAS1), mRNA.	9	-0.766196	7.56703	3.16272e-05
ILMN_1785493	FCER1G	Homo sapiens Fc fragment of IgE, high affinity I, receptor for; gamma polypeptide (FCER1G), mRNA.	1	-0.747938	8.79036	3.21133e-05
ILMN_1682332	GYPC	Homo sapiens glycophorin C (Gerbich blood group) (GYPC), transcript variant 1, mRNA.	2	-0.703636	8.39721	3.34252e-05
ILMN_1716400	FOXM1	Homo sapiens forkhead box M1 (FOXM1), transcript variant 1, mRNA.	12	-0.648364	8.56091	3.40951e-05
ILMN_1795325	ACTG2	Homo sapiens actin, gamma 2, smooth muscle, enteric (ACTG2), mRNA.	2	-1.57035	11.2118	3.44839e-05
ILMN_1724994	COL4A2	Homo sapiens collagen, type IV, alpha 2 (COL4A2), mRNA.		-0.754273	9.17867	3.80599e-05
ILMN_1689431	APCDD1L	Homo sapiens adenomatosis polyposis coli down-regulated 1-like (APCDD1L), mRNA.	20	-0.751738	7.67364	3.87695e-05
ILMN_1740104	HOXC6	Homo sapiens homeobox C6 (HOXC6), transcript variant 1, mRNA.	12	-0.617202	7.88939	3.93044e-05
ILMN_1687978	PHLDA1	Homo sapiens pleckstrin homology-like domain, family A, member 1 (PHLDA1), mRNA.	12	-1.05619	9.86648	4.01127e-05
ILMN_1731184	MELK	Homo sapiens maternal embryonic leucine zipper kinase (MELK), mRNA.	9	-0.772473	8.44376	4.13258e-05
ILMN_1676088	MSRB3	Homo sapiens methionine sulfoxide reductase B3 (MSRB3), transcript variant 2, mRNA.	12	-0.845489	7.77624	4.13391e-05
ILMN_1778010	IL32	Homo sapiens interleukin 32 (IL32), transcript variant 1, mRNA.	16	-0.726546	8.17388	4.23153e-05
ILMN_1772612	ANGPTL2	Homo sapiens angiopoietin-like 2 (ANGPTL2), mRNA.	9	-0.819408	8.98139	4.31204e-05
ILMN_1658027	RAD54L	Homo sapiens RAD54-like (S. cerevisiae) (RAD54L), mRNA.	1	-0.761093	8.86715	4.32715e-05
ILMN_1719641	SMOC2	Homo sapiens SPARC related modular calcium binding 2 (SMOC2), mRNA.	6	-0.99739	8.224	4.38641e-05
ILMN_1682015	GAL	Homo sapiens galanin (GAL), mRNA.	11	-0.658472	7.44121	4.38766e-05
ILMN_1808591	LOC731049	PREDICTED: Homo sapiens similar to Ubiquitin-conjugating enzyme E2S (Ubiquitin-conjugating enzyme E2-24 kDa) (Ubiquitin-protein ligase) (Ubiquitin carrier protein) (E2-EPF5) (LOC731049), mRNA.		-0.693295	11.4092	4.41768e-05
ILMN_1712046	CPXM1	Homo sapiens carboxypeptidase X (M14 family), member 1 (CPXM1), mRNA.	20	-0.660664	8.28242	4.42431e-05
ILMN_1901419		BP873537 Sugano cDNA library, embryonal kidney Homo sapiens cDNA clone HKR13896, mRNA sequence		-0.721074	8.89794	4.5185e-05
ILMN_1749226	MMP11	Homo sapiens matrix metallopeptidase 11 (stromelysin 3) (MMP11), mRNA.	22	-0.858389	8.32206	4.54472e-05
ILMN_1685916	KIF2C	Homo sapiens kinesin family member 2C (KIF2C), mRNA.	1	-0.810889	8.95897	4.54472e-05
ILMN_1801710	APBB1IP	Homo sapiens amyloid beta (A4) precursor protein-binding, family B, member 1 interacting protein (APBB1IP), mRNA.	10	-0.826353	8.16109	4.55634e-05
ILMN_1723035	OLR1	Homo sapiens oxidized low density lipoprotein (lectin-like) receptor 1 (OLR1), mRNA.		-0.781174	8.03945	4.64512e-05
ILMN_1799725	DOCK2	Homo sapiens dedicator of cytokinesis 2 (DOCK2), mRNA.	5	-0.652133	8.12388	4.86341e-05
ILMN_1783593	CCL13	Homo sapiens chemokine (C-C motif) ligand 13 (CCL13), mRNA.	17	-0.6858	8.07964	4.91681e-05
ILMN_1810628	KIAA0367	Homo sapiens KIAA0367 (KIAA0367), mRNA.	9	-1.12381	7.83121	4.91952e-05
ILMN_1721283	HSPB6	Homo sapiens heat shock protein, alpha-crystallin-related, B6 (HSPB6), mRNA.	19	-1.07795	7.75194	5.08413e-05
ILMN_1801616	EMP1	Homo sapiens epithelial membrane protein 1 (EMP1), mRNA.	12	-0.997916	10.5411	5.23552e-05
ILMN_1720829	ZFP36	Homo sapiens zinc finger protein 36, C3H type, homolog (mouse) (ZFP36), mRNA.	19	-0.82391	11.7875	5.26881e-05
ILMN_1792494	TPX2	Homo sapiens TPX2, microtubule-associated, homolog (Xenopus laevis) (TPX2), mRNA.	20	-0.96303	9.65255	5.55418e-05
ILMN_1682774	C13orf27	Homo sapiens chromosome 13 open reading frame 27 (C13orf27), mRNA.	13	-0.662056	9.10139	5.55418e-05
ILMN_1751776	CKAP2L	Homo sapiens cytoskeleton associated protein 2-like (CKAP2L), mRNA.	2	-0.81661	8.82782	5.55418e-05
ILMN_1796712	S100A10	Homo sapiens S100 calcium binding protein A10 (annexin II ligand, calpactin I, light polypeptide (p11)) (S100A10), mRNA.	1	-1.01465	12.479	5.90444e-05
ILMN_1663866	TGFBI	Homo sapiens transforming growth factor, beta-induced, 68kDa (TGFBI), mRNA.	5	-0.893898	11.5176	6.42924e-05
ILMN_1815057	PDGFRB	Homo sapiens platelet-derived growth factor receptor, beta polypeptide (PDGFRB), mRNA.	5	-0.786964	10.297	6.51486e-05
ILMN_1767665	LOC493869	Homo sapiens similar to RIKEN cDNA 2310016C16 (LOC493869), mRNA.	5	-0.624053	7.89818	6.59195e-05
ILMN_1726589	CD248	Homo sapiens CD248 molecule, endosialin (CD248), mRNA.	11	-0.743605	9.08194	6.69015e-05
ILMN_1702487	SGK	Homo sapiens serum/glucocorticoid regulated kinase (SGK), mRNA.	6	-0.90078	11.1167	6.70629e-05
ILMN_1676449	SLIT2	Homo sapiens slit homolog 2 (Drosophila) (SLIT2), mRNA.	4	-0.684858	7.91152	6.71571e-05
ILMN_1812073	ATP6V1B1	Homo sapiens ATPase, H+ transporting, lysosomal 56/58kDa, V1 subunit B1 (Renal tubular acidosis with deafness) (ATP6V1B1), mRNA.	2	-0.82658	8.21079	7.01457e-05
ILMN_1746888	PCOLCE2	Homo sapiens procollagen C-endopeptidase enhancer 2 (PCOLCE2), mRNA.	3	-0.615308	7.65558	7.10748e-05
ILMN_1664516	CENPF	Homo sapiens centromere protein F, 350/400ka (mitosin) (CENPF), mRNA.	1	-0.893697	9.2097	7.16854e-05
ILMN_1789196	TPM2	Homo sapiens tropomyosin 2 (beta) (TPM2), transcript variant 2, mRNA.	9	-1.0252	11.5321	7.195e-05
ILMN_1783956	ATP8B4	Homo sapiens ATPase, Class I, type 8B, member 4 (ATP8B4), mRNA.	15	-0.632864	8.07994	7.20757e-05
ILMN_1778240	GFOD1	Homo sapiens glucose-fructose oxidoreductase domain containing 1 (GFOD1), mRNA.	6	-0.765128	9.7077	7.32119e-05
ILMN_1706687	KLHL5	Homo sapiens kelch-like 5 (Drosophila) (KLHL5), transcript variant 1, mRNA.	4	-0.672272	9.45824	7.32301e-05
ILMN_1813638	IQGAP3	Homo sapiens IQ motif containing GTPase activating protein 3 (IQGAP3), mRNA.	1	-0.924742	10.3776	7.57597e-05
ILMN_1763704	RGS11	Homo sapiens regulator of G-protein signalling 11 (RGS11), transcript variant 2, mRNA.	16	-0.926408	8.6717	7.5997e-05
ILMN_1758164	STC1	Homo sapiens stanniocalcin 1 (STC1), mRNA.	8	-0.667595	8.90648	7.63907e-05
ILMN_1815184	ASPM	Homo sapiens asp (abnormal spindle) homolog, microcephaly associated (Drosophila) (ASPM), mRNA.		-0.966578	9.19388	7.71101e-05
ILMN_1751444	NCAPG	Homo sapiens non-SMC condensin I complex, subunit G (NCAPG), mRNA.	4	-0.868467	9.30158	7.73841e-05
ILMN_1695299	PDLIM3	Homo sapiens PDZ and LIM domain 3 (PDLIM3), mRNA.	4	-1.00085	8.20297	8.00148e-05
ILMN_1695687	SALL4	Homo sapiens sal-like 4 (Drosophila) (SALL4), mRNA.	20	-0.990418	9.25255	8.00753e-05
ILMN_1721901	CTNNAL1	Homo sapiens catenin (cadherin-associated protein), alpha-like 1 (CTNNAL1), mRNA.	9	-0.700219	8.71515	8.29622e-05
ILMN_1770338	TM4SF1	Homo sapiens transmembrane 4 L six family member 1 (TM4SF1), mRNA.	3	-1.05979	11.4718	8.32669e-05
ILMN_1677401	ZDHHC14	Homo sapiens zinc finger, DHHC-type containing 14 (ZDHHC14), transcript variant 1, mRNA.	6	-0.648113	10.3085	8.33323e-05
ILMN_1682846	IFI30	Homo sapiens interferon, gamma-inducible protein 30 (IFI30), mRNA.	19	-0.788135	11.0243	8.33323e-05
ILMN_1716279	CENPE	Homo sapiens centromere protein E, 312kDa (CENPE), mRNA.	4	-0.669281	8.3343	8.33323e-05
ILMN_1740938	APOE	Homo sapiens apolipoprotein E (APOE), mRNA.	19	-0.993497	10.4893	8.55763e-05
ILMN_1797009	F3	Homo sapiens coagulation factor III (thromboplastin, tissue factor) (F3), mRNA.	1	-0.669032	8.13139	8.57968e-05
ILMN_1695288	LOC730456	PREDICTED: Homo sapiens hypothetical protein LOC730456 (LOC730456), mRNA.		-0.605142	8.00321	8.57968e-05
ILMN_1741003	ANXA5	Homo sapiens annexin A5 (ANXA5), mRNA.	4	-0.739137	10.9652	8.78274e-05
ILMN_1693826	HAVCR2	Homo sapiens hepatitis A virus cellular receptor 2 (HAVCR2), mRNA.	5	-0.654499	9.28127	8.8477e-05
ILMN_1720513	SETBP1	Homo sapiens SET binding protein 1 (SETBP1), mRNA.	18	-0.735294	8.71503	8.8477e-05
ILMN_1695276	MAPRE2	Homo sapiens microtubule-associated protein, RP/EB family, member 2 (MAPRE2), mRNA.	18	-0.678876	9.38364	8.8477e-05
ILMN_1769926	DBN1	Homo sapiens drebrin 1 (DBN1), transcript variant 2, mRNA.	5	-0.684179	9.62145	8.91649e-05
ILMN_1684982	PDK4	Homo sapiens pyruvate dehydrogenase kinase, isozyme 4 (PDK4), mRNA.	7	-0.933869	8.62139	8.91649e-05
ILMN_1747016	CEP55	Homo sapiens centrosomal protein 55kDa (CEP55), mRNA.	10	-0.887759	9.01824	8.98708e-05
ILMN_1810054	CNN1	Homo sapiens calponin 1, basic, smooth muscle (CNN1), mRNA.	19	-1.32027	8.01212	9.08909e-05
ILMN_1666502	FLJ10159	Homo sapiens hypothetical protein FLJ10159 (FLJ10159), mRNA.		-0.631281	8.33012	9.08909e-05
ILMN_1811873	RARRES2	Homo sapiens retinoic acid receptor responder (tazarotene induced) 2 (RARRES2), mRNA.	7	-0.809973	9.25261	9.09224e-05
ILMN_1751136	MAP1B	Homo sapiens microtubule-associated protein 1B (MAP1B), transcript variant 1, mRNA.	5	-0.679732	8.22842	9.13986e-05
ILMN_1687335	FLNA	Homo sapiens filamin A, alpha (actin binding protein 280) (FLNA), mRNA.		-0.839785	9.65206	9.20663e-05
ILMN_1892403		AGENCOURT_7908292 NIH_MGC_82 Homo sapiens cDNA clone IMAGE:6102595 5, mRNA sequence		-0.823259	10.2992	9.93462e-05
ILMN_1778977	TYROBP	Homo sapiens TYRO protein tyrosine kinase binding protein (TYROBP), transcript variant 1, mRNA.	19	-0.863788	9.6503	0.000101297
ILMN_1653162	HSD17B6	Homo sapiens hydroxysteroid (17-beta) dehydrogenase 6 homolog (mouse) (HSD17B6), mRNA.	12	-0.647288	7.524	0.000103373
ILMN_1793068	LOC731049	PREDICTED: Homo sapiens similar to Ubiquitin-conjugating enzyme E2S (Ubiquitin-conjugating enzyme E2-24 kDa) (Ubiquitin-protein ligase) (Ubiquitin carrier protein) (E2-EPF5) (LOC731049), mRNA.		-0.619084	9.77661	0.000106318
ILMN_1658660	ACTC1	Homo sapiens actin, alpha, cardiac muscle 1 (ACTC1), mRNA.		-1.2461	7.84842	0.000106868
ILMN_1730706	FOSB	Homo sapiens FBJ murine osteosarcoma viral oncogene homolog B (FOSB), mRNA.	19	-1.42884	9.82515	0.000113394
ILMN_1682326	PCP4	Homo sapiens Purkinje cell protein 4 (PCP4), mRNA.	21	-1.22082	8.24339	0.000113933
ILMN_1760830	FBXO32	Homo sapiens F-box protein 32 (FBXO32), transcript variant 2, mRNA.	8	-0.634057	9.10048	0.00011439
ILMN_1728972	FAM64A	Homo sapiens family with sequence similarity 64, member A (FAM64A), mRNA.	17	-0.690758	8.47461	0.000114611
ILMN_1808347	CDC45L	Homo sapiens CDC45 cell division cycle 45-like (S. cerevisiae) (CDC45L), mRNA.	22	-0.611517	8.07939	0.000118679
ILMN_1712305	CYBRD1	Homo sapiens cytochrome b reductase 1 (CYBRD1), mRNA.	2	-0.86591	8.91333	0.000121189
ILMN_1675053	DMN	Homo sapiens desmuslin (DMN), transcript variant A, mRNA.		-1.03922	8.53321	0.000122812
ILMN_1792323	HDC	Homo sapiens histidine decarboxylase (HDC), mRNA.	15	-0.717022	7.88273	0.000125741
ILMN_1673352	IFITM2	Homo sapiens interferon induced transmembrane protein 2 (1-8D) (IFITM2), mRNA.	11	-0.715063	12.3393	0.00012807
ILMN_1652065	KCNMB1	Homo sapiens potassium large conductance calcium-activated channel, subfamily M, beta member 1 (KCNMB1), mRNA.	5	-0.947235	8.01321	0.00012903
ILMN_1740291	POLQ	Homo sapiens polymerase (DNA directed), theta (POLQ), mRNA.	3	-0.765031	9.01776	0.000130426
ILMN_1659306	SVIL	Homo sapiens supervillin (SVIL), transcript variant 2, mRNA.	10	-0.604717	9.93509	0.000133889
ILMN_1659895	MSN	Homo sapiens moesin (MSN), mRNA.	X	-0.763692	10.9123	0.000135419
ILMN_1706194	MCM10	Homo sapiens MCM10 minichromosome maintenance deficient 10 (S. cerevisiae) (MCM10), transcript variant 1, mRNA.	10	-0.600933	8.13648	0.000136353
ILMN_1796589	TRIP13	Homo sapiens thyroid hormone receptor interactor 13 (TRIP13), mRNA.	5	-0.883863	9.30455	0.00013806
ILMN_1744381	SERPINE1	Homo sapiens serpin peptidase inhibitor, clade E (nexin, plasminogen activator inhibitor type 1), member 1 (SERPINE1), mRNA.	7	-0.850969	8.86927	0.00013892
ILMN_1737184	CDCA7	Homo sapiens cell division cycle associated 7 (CDCA7), transcript variant 2, mRNA.	2	-0.763434	8.9323	0.000144019
ILMN_1791511	TMEM176A	Homo sapiens transmembrane protein 176A (TMEM176A), mRNA.	7	-0.626726	8.49055	0.000144019
ILMN_1806037	TK1	Homo sapiens thymidine kinase 1, soluble (TK1), mRNA.	17	-0.849878	9.37721	0.00014665
ILMN_1787897	CXCL1	Homo sapiens chemokine (C-X-C motif) ligand 1 (melanoma growth stimulating activity, alpha) (CXCL1), mRNA.	4	-0.844071	9.42503	0.000150531
ILMN_1684217	AURKB	Homo sapiens aurora kinase B (AURKB), mRNA.	17	-0.755008	9.62127	0.000151165
ILMN_1700337	TROAP	Homo sapiens trophinin associated protein (tastin) (TROAP), mRNA.	12	-0.774443	8.82382	0.00015286
ILMN_1796629	EDNRA	Homo sapiens endothelin receptor type A (EDNRA), mRNA.	4	-0.676084	8.54812	0.000156263
ILMN_1765796	ENO2	Homo sapiens enolase 2 (gamma, neuronal) (ENO2), mRNA.	12	-0.747999	10.5915	0.000159508
ILMN_1691884	STC2	Homo sapiens stanniocalcin 2 (STC2), mRNA.	5	-0.686441	8.49133	0.0001654
ILMN_1768291	SPAG5	Homo sapiens sperm associated antigen 5 (SPAG5), mRNA.	17	-0.70233	9.63158	0.000166425
ILMN_1741688	CPXM2	Homo sapiens carboxypeptidase X (M14 family), member 2 (CPXM2), mRNA.	10	-0.819504	8.23182	0.000170952
ILMN_1708006	MICB	Homo sapiens MHC class I polypeptide-related sequence B (MICB), mRNA.	6	-0.609258	8.51903	0.000174451
ILMN_1718898	HOXC9	Homo sapiens homeobox C9 (HOXC9), mRNA.	12	-0.607966	7.86903	0.000176328
ILMN_1782538	VIM	Homo sapiens vimentin (VIM), mRNA.	10	-0.93013	11.2392	0.000181482
ILMN_1703123	AXUD1	Homo sapiens AXIN1 up-regulated 1 (AXUD1), mRNA.	3	-0.685974	11.3158	0.00018429
ILMN_1728934	PRC1	Homo sapiens protein regulator of cytokinesis 1 (PRC1), transcript variant 1, mRNA.	15	-0.845374	10.0416	0.000190637
ILMN_1784749	GAS6	Homo sapiens growth arrest-specific 6 (GAS6), mRNA.	13	-0.765108	9.574	0.000192785
ILMN_1785902	C1QC	Homo sapiens complement component 1, q subcomponent, C chain (C1QC), mRNA.	1	-0.845805	9.2783	0.000195696
ILMN_1796409	C1QB	Homo sapiens complement component 1, q subcomponent, B chain (C1QB), mRNA.	1	-0.904324	9.72952	0.000199829
ILMN_1769575	JAM3	Homo sapiens junctional adhesion molecule 3 (JAM3), mRNA.	11	-0.805188	9.2243	0.000201553
ILMN_1686981	SULF2	Homo sapiens sulfatase 2 (SULF2), transcript variant 1, mRNA.	20	-0.635142	8.25448	0.000205734
ILMN_1801939	CCNB2	Homo sapiens cyclin B2 (CCNB2), mRNA.	15	-0.944692	9.70061	0.000208895
ILMN_1735499	DCBLD2	Homo sapiens discoidin, CUB and LCCL domain containing 2 (DCBLD2), mRNA.	3	-0.749928	9.13412	0.000210043
ILMN_1695339	RNASE1	Homo sapiens ribonuclease, RNase A family, 1 (pancreatic) (RNASE1), transcript variant 3, mRNA.	14	-0.737697	11.2013	0.000214515
ILMN_1687583	CAV1	Homo sapiens caveolin 1, caveolae protein, 22kDa (CAV1), mRNA.	7	-0.687178	8.58297	0.000219718
ILMN_1684554	COL16A1	Homo sapiens collagen, type XVI, alpha 1 (COL16A1), mRNA.		-0.883312	9.37521	0.000227705
ILMN_1671703	ACTA2	Homo sapiens actin, alpha 2, smooth muscle, aorta (ACTA2), mRNA.	10	-0.981676	12.4295	0.000229335
ILMN_1697628	ADARB1	Homo sapiens adenosine deaminase, RNA-specific, B1 (RED1 homolog rat) (ADARB1), transcript variant 1, mRNA.	21	-0.601157	9.29715	0.000233421
ILMN_1782305	NR4A2	Homo sapiens nuclear receptor subfamily 4, group A, member 2 (NR4A2), transcript variant 1, mRNA.	2	-0.803382	9.69333	0.000235071
ILMN_1657111	C14orf78	PREDICTED: Homo sapiens chromosome 14 open reading frame 78, transcript variant 1 (C14orf78), mRNA.	14	-1.22669	9.24715	0.000236283
ILMN_1787026	SEC61G	Homo sapiens Sec61 gamma subunit (SEC61G), transcript variant 2, mRNA.	7	-0.624136	12.8425	0.000238389
ILMN_1679262	DPYSL3	Homo sapiens dihydropyrimidinase-like 3 (DPYSL3), mRNA.	5	-1.07685	10.3708	0.000244301
ILMN_1681783	ANXA1	Homo sapiens annexin A1 (ANXA1), mRNA.	9	-1.09432	11.3833	0.000245233
ILMN_1673863	C9orf58	Homo sapiens chromosome 9 open reading frame 58 (C9orf58), transcript variant 1, mRNA.	9	-0.779342	11.0767	0.000245233
ILMN_1664511	NDC80	Homo sapiens NDC80 homolog, kinetochore complex component (S. cerevisiae) (NDC80), mRNA.	18	-0.70529	8.58521	0.000249884
ILMN_1739645	ANLN	Homo sapiens anillin, actin binding protein (ANLN), mRNA.	7	-0.730204	8.89127	0.000250135
ILMN_1732151	COL6A1	Homo sapiens collagen, type VI, alpha 1 (COL6A1), mRNA.	21	-0.945794	10.5393	0.000251322
ILMN_1736911	TMOD1	Homo sapiens tropomodulin 1 (TMOD1), mRNA.	9	-0.681525	7.60327	0.000252422
ILMN_1667468	DACT3	Homo sapiens dapper, antagonist of beta-catenin, homolog 3 (Xenopus laevis) (DACT3), mRNA.	19	-0.764793	8.23145	0.000254247
ILMN_1779228	CDH2	Homo sapiens cadherin 2, type 1, N-cadherin (neuronal) (CDH2), mRNA.	18	-0.813755	8.1817	0.000257735
ILMN_1723079	LTB4R	Homo sapiens leukotriene B4 receptor (LTB4R), mRNA.	14	-0.644469	9.55673	0.000261745
ILMN_1680344	MYOM1	Homo sapiens myomesin 1 (skelemin) 185kDa (MYOM1), mRNA.	18	-0.935233	8.75909	0.000263815
ILMN_1680424	CTSG	Homo sapiens cathepsin G (CTSG), mRNA.	14	-0.656214	7.76036	0.000266524
ILMN_1724407	TACC3	Homo sapiens transforming, acidic coiled-coil containing protein 3 (TACC3), mRNA.	4	-0.873799	9.94067	0.000267316
ILMN_1729749	HERC5	Homo sapiens hect domain and RLD 5 (HERC5), mRNA.		-0.757343	9.72836	0.000270117
ILMN_1746673	SEPT3	Homo sapiens septin 3 (SEPT3), transcript variant B, mRNA.	22	-0.635983	8.20412	0.000276071
ILMN_1748384	BOC	Homo sapiens Boc homolog (mouse) (BOC), mRNA.	3	-0.623531	7.98964	0.000276456
ILMN_1800512	HMOX1	Homo sapiens heme oxygenase (decycling) 1 (HMOX1), mRNA.	22	-0.805858	8.92679	0.000277433
ILMN_1783909	COL6A2	Homo sapiens collagen, type VI, alpha 2 (COL6A2), transcript variant 2C2, mRNA.		-0.789203	8.90364	0.000285729
ILMN_1709294	CDCA8	Homo sapiens cell division cycle associated 8 (CDCA8), mRNA.	1	-0.7045	8.86958	0.000287549
ILMN_1758529	P2RX1	Homo sapiens purinergic receptor P2X, ligand-gated ion channel, 1 (P2RX1), mRNA.	17	-0.860692	7.82885	0.00028886
ILMN_1761425	OLFML2A	Homo sapiens olfactomedin-like 2A (OLFML2A), mRNA.		-0.697159	9.56255	0.000302449
ILMN_1764709	MAFB	Homo sapiens v-maf musculoaponeurotic fibrosarcoma oncogene homolog B (avian) (MAFB), mRNA.	20	-0.720786	9.19715	0.000306007
ILMN_1782125	DSC2	Homo sapiens desmocollin 2 (DSC2), transcript variant Dsc2b, mRNA.	18	-0.902493	8.7663	0.000309869
ILMN_1709348	ALDH1A1	Homo sapiens aldehyde dehydrogenase 1 family, member A1 (ALDH1A1), mRNA.	9	-0.899638	8.19018	0.000313431
ILMN_1669497	OSBPL10	Homo sapiens oxysterol binding protein-like 10 (OSBPL10), mRNA.	3	-0.722476	9.274	0.000326244
ILMN_1701877	AXL	Homo sapiens AXL receptor tyrosine kinase (AXL), transcript variant 2, mRNA.	19	-0.634692	9.45412	0.000329542
ILMN_1714991	S100A9	Homo sapiens S100 calcium binding protein A9 (S100A9), mRNA.		-1.14726	9.43012	0.000329858
ILMN_1774602	FBLN2	Homo sapiens fibulin 2 (FBLN2), transcript variant 1, mRNA.	3	-0.71322	8.60994	0.000333255
ILMN_1809440	KIF15	Homo sapiens kinesin family member 15 (KIF15), mRNA.	3	-0.647455	8.17212	0.000333449
ILMN_1796179	HIST1H2BK	Homo sapiens histone cluster 1, H2bk (HIST1H2BK), mRNA.	6	-0.612836	12.8312	0.000333949
ILMN_1730049	C20orf127	Homo sapiens chromosome 20 open reading frame 127 (C20orf127), mRNA.	20	-0.602944	8.38394	0.000342294
ILMN_1781285	DUSP1	Homo sapiens dual specificity phosphatase 1 (DUSP1), mRNA.	5	-1.11799	11.1119	0.000346389
ILMN_1680955	AURKA	Homo sapiens aurora kinase A (AURKA), transcript variant 5, mRNA.	20	-0.806107	9.7797	0.000359862
ILMN_1731538	ZEB2	Homo sapiens zinc finger E-box binding homeobox 2 (ZEB2), mRNA.	2	-0.632781	8.30564	0.000361575
ILMN_1758146	SIRPA	Homo sapiens signal-regulatory protein alpha (SIRPA), transcript variant 1, mRNA.	20	-0.691746	10.2987	0.000367131
ILMN_1796013	PYCR1	Homo sapiens pyrroline-5-carboxylate reductase 1 (PYCR1), transcript variant 1, mRNA.	17	-0.643924	8.47545	0.000376718
ILMN_1652240	STMN1	Homo sapiens stathmin 1/oncoprotein 18 (STMN1), transcript variant 2, mRNA.	1	-0.603436	8.7717	0.000376906
ILMN_1686116	THBS1	Homo sapiens thrombospondin 1 (THBS1), mRNA.	15	-0.804085	10.0456	0.000377626
ILMN_1745251	DTL	Homo sapiens denticleless homolog (Drosophila) (DTL), mRNA.	1	-0.681865	9.31806	0.000379333
ILMN_1733950	BUB1B	Homo sapiens BUB1 budding uninhibited by benzimidazoles 1 homolog beta (yeast) (BUB1B), mRNA.	15	-0.668403	8.6763	0.000384409
ILMN_1780057	RENBP	Homo sapiens renin binding protein (RENBP), mRNA.	X	-0.666162	9.19012	0.000387822
ILMN_1790689	CRISPLD2	Homo sapiens cysteine-rich secretory protein LCCL domain containing 2 (CRISPLD2), mRNA.	16	-0.678008	10.1622	0.00040963
ILMN_1722329	CASQ2	Homo sapiens calsequestrin 2 (cardiac muscle) (CASQ2), mRNA.		-0.831827	7.45606	0.000417103
ILMN_1798256	UPP1	Homo sapiens uridine phosphorylase 1 (UPP1), transcript variant 2, mRNA.	7	-0.611885	10.1355	0.000446984
ILMN_1673673	PBK	Homo sapiens PDZ binding kinase (PBK), mRNA.	8	-0.636477	8.30139	0.000448341
ILMN_1797731	MS4A6A	Homo sapiens membrane-spanning 4-domains, subfamily A, member 6A (MS4A6A), transcript variant 2, mRNA.	11	-0.649239	8.76988	0.000467254
ILMN_1657502	MRGPRF	Homo sapiens MAS-related GPR, member F (MRGPRF), mRNA.	11	-0.873028	8.20921	0.000468205
ILMN_1698995	DES	Homo sapiens desmin (DES), mRNA.	2	-1.17196	7.89358	0.00048663
ILMN_1805750	IFITM3	Homo sapiens interferon induced transmembrane protein 3 (1-8U) (IFITM3), mRNA.	11	-0.744583	12.3289	0.00049831
ILMN_1757351	S100A7	Homo sapiens S100 calcium binding protein A7 (S100A7), mRNA.		-0.827762	7.68473	0.000508168
ILMN_1749829	DLG7	Homo sapiens discs, large homolog 7 (Drosophila) (DLG7), mRNA.	14	-0.751315	8.55455	0.000524473
ILMN_1724424	PRRT2	Homo sapiens proline-rich transmembrane protein 2 (PRRT2), mRNA.	16	-0.775221	9.30285	0.000524473
ILMN_1802082	PRDM8	Homo sapiens PR domain containing 8 (PRDM8), mRNA.	4	-0.616596	8.02703	0.000529168
ILMN_1658835	CAV2	Homo sapiens caveolin 2 (CAV2), transcript variant 2, mRNA.	7	-0.614566	8.55539	0.000544631
ILMN_1725510	DHCR24	Homo sapiens 24-dehydrocholesterol reductase (DHCR24), mRNA.		-0.879485	9.69018	0.000550235
ILMN_1703092	RECQL4	Homo sapiens RecQ protein-like 4 (RECQL4), mRNA.		-0.678965	8.836	0.000557913
ILMN_1726720	NUSAP1	Homo sapiens nucleolar and spindle associated protein 1 (NUSAP1), transcript variant 1, mRNA.	15	-0.819569	10.3915	0.000558675
ILMN_1785272	COL1A2	Homo sapiens collagen, type I, alpha 2 (COL1A2), mRNA.	7	-0.86179	10.879	0.000573836
ILMN_1805842	FHL1	Homo sapiens four and a half LIM domains 1 (FHL1), mRNA.	X	-0.975235	8.54364	0.000573836
ILMN_1681754	GGH	Homo sapiens gamma-glutamyl hydrolase (conjugase, folylpolygammaglutamyl hydrolase) (GGH), mRNA.	8	-0.793558	9.05527	0.000600203
ILMN_1686097	TOP2A	Homo sapiens topoisomerase (DNA) II alpha 170kDa (TOP2A), mRNA.	17	-0.992242	10.4477	0.000601581
ILMN_1777233	E2F2	Homo sapiens E2F transcription factor 2 (E2F2), mRNA.	1	-0.778193	9.51261	0.000601896
ILMN_1803278	PGM5	Homo sapiens phosphoglucomutase 5 (PGM5), mRNA.	9	-1.06714	8.38836	0.00060207
ILMN_1785618	SMTN	Homo sapiens smoothelin (SMTN), transcript variant 3, mRNA.	22	-0.770534	9.264	0.000605827
ILMN_1779448	EFHD1	Homo sapiens EF-hand domain family, member D1 (EFHD1), mRNA.	2	-0.66792	8.35564	0.000606645
ILMN_1672611	CDH11	Homo sapiens cadherin 11, type 2, OB-cadherin (osteoblast) (CDH11), mRNA.	16	-0.705147	8.51933	0.000607551
ILMN_1845901		Homo sapiens cDNA clone IMAGE:5312689		-0.636755	7.64509	0.0006104
ILMN_1663390	CDC20	Homo sapiens cell division cycle 20 homolog (S. cerevisiae) (CDC20), mRNA.		-0.969681	11.2334	0.000611804
ILMN_1737728	CDCA3	Homo sapiens cell division cycle associated 3 (CDCA3), mRNA.	12	-0.669372	8.61618	0.000615605
ILMN_1760493	LIMS2	Homo sapiens LIM and senescent cell antigen-like domains 2 (LIMS2), mRNA.	2	-0.624001	8.29418	0.000641045
ILMN_1796316	MMP9	Homo sapiens matrix metallopeptidase 9 (gelatinase B, 92kDa gelatinase, 92kDa type IV collagenase) (MMP9), mRNA.	20	-0.833724	8.32891	0.000664675
ILMN_1767754	TRIB1	Homo sapiens tribbles homolog 1 (Drosophila) (TRIB1), mRNA.	8	-0.62632	12.0161	0.000681499
ILMN_1770800	PODN	Homo sapiens podocan (PODN), mRNA.	1	-0.717833	9.17158	0.000687449
ILMN_1753196	PTTG1	Homo sapiens pituitary tumor-transforming 1 (PTTG1), mRNA.	5	-0.68399	9.31012	0.000690344
ILMN_1711439	EMILIN1	Homo sapiens elastin microfibril interfacer 1 (EMILIN1), mRNA.	2	-0.620598	8.16776	0.000690575
ILMN_1651958	MGP	Homo sapiens matrix Gla protein (MGP), mRNA.	12	-1.05345	10.4079	0.000729731
ILMN_1748352	CTSL2	Homo sapiens cathepsin L2 (CTSL2), mRNA.	9	-0.643669	8.43448	0.00073101
ILMN_1731185	LEPREL2	Homo sapiens leprecan-like 2 (LEPREL2), mRNA.		-0.733545	10.7166	0.000765712
ILMN_1756071	MFGE8	Homo sapiens milk fat globule-EGF factor 8 protein (MFGE8), mRNA.	15	-0.610446	11.891	0.000766098
ILMN_1651237	CDT1	Homo sapiens chromatin licensing and DNA replication factor 1 (CDT1), mRNA.	16	-0.73344	9.04909	0.000767514
ILMN_1718285	HOXC8	Homo sapiens homeobox C8 (HOXC8), mRNA.	12	-0.601383	7.79733	0.000774411
ILMN_1887357		Homo sapiens cDNA FLJ38396 fis, clone FEBRA2007957		-0.625727	7.52988	0.00079143
ILMN_1770922	TMEM45A	Homo sapiens transmembrane protein 45A (TMEM45A), mRNA.	3	-0.687924	8.19218	0.000806519
ILMN_1693192	PI3	Homo sapiens peptidase inhibitor 3, skin-derived (SKALP) (PI3), mRNA.	20	-1.14762	8.11861	0.000822374
ILMN_1790234	NUPR1	Homo sapiens nuclear protein 1 (NUPR1), transcript variant 2, mRNA.		-0.912288	9.85358	0.000872691
ILMN_1733746	REEP1	Homo sapiens receptor accessory protein 1 (REEP1), mRNA.	2	-0.631845	8.31558	0.000872691
ILMN_1738552	SLC1A3	Homo sapiens solute carrier family 1 (glial high affinity glutamate transporter), member 3 (SLC1A3), mRNA.	5	-0.620587	8.95115	0.000873244
ILMN_1670353	RAD51AP1	Homo sapiens RAD51 associated protein 1 (RAD51AP1), mRNA.	12	-0.638406	8.46406	0.00089424
ILMN_1802615	CDK6	Homo sapiens cyclin-dependent kinase 6 (CDK6), mRNA.	7	-0.643495	8.7983	0.000895174
ILMN_1742958	UBE2C	Homo sapiens ubiquitin-conjugating enzyme E2C (UBE2C), transcript variant 5, mRNA.	20	-0.878404	9.74473	0.000904463
ILMN_1711174	SPRR1B	Homo sapiens small proline-rich protein 1B (cornifin) (SPRR1B), mRNA.	1	-0.798453	7.90964	0.00091779
ILMN_1700081	FST	Homo sapiens follistatin (FST), transcript variant FST344, mRNA.	5	-0.665943	9.008	0.000926644
ILMN_1788166	TTK	Homo sapiens TTK protein kinase (TTK), mRNA.	6	-0.778478	9.38436	0.000935012
ILMN_1664464	PTGDS	Homo sapiens prostaglandin D2 synthase 21kDa (brain) (PTGDS), mRNA.	9	-0.751463	7.87897	0.00094162
ILMN_1656501	DUSP5	Homo sapiens dual specificity phosphatase 5 (DUSP5), mRNA.	10	-0.853898	11.0926	0.00100616
ILMN_1710410	CHRM3	Homo sapiens cholinergic receptor, muscarinic 3 (CHRM3), mRNA.	1	-0.605351	7.68873	0.00101063
ILMN_1704537	PHGDH	Homo sapiens phosphoglycerate dehydrogenase (PHGDH), mRNA.	1	-0.784493	12.1021	0.00101795
ILMN_1652199	LOC642113	PREDICTED: Homo sapiens similar to Ig kappa chain V-III region HAH precursor (LOC642113), mRNA.		-1.06915	8.54485	0.00104498
ILMN_1786065	UHRF1	Homo sapiens ubiquitin-like, containing PHD and RING finger domains, 1 (UHRF1), transcript variant 1, mRNA.		-0.792839	9.86782	0.00104571
ILMN_1663427	MYLK	Homo sapiens myosin, light polypeptide kinase (MYLK), transcript variant 5, mRNA.	3	-0.836148	8.02836	0.00107174
ILMN_1709486	SRPX	Homo sapiens sushi-repeat-containing protein, X-linked (SRPX), mRNA.	X	-0.80482	8.43824	0.00109144
ILMN_1716382	LOC387882	Homo sapiens hypothetical protein (LOC387882), mRNA.	12	-0.64371	8.43188	0.00115926
ILMN_1677636	COMP	Homo sapiens cartilage oligomeric matrix protein (COMP), mRNA.	19	-0.634588	8.00612	0.00117849
ILMN_1654396	ITGB2	Homo sapiens integrin, beta 2 (antigen CD18 (p95), lymphocyte function-associated antigen 1; macrophage antigen 1 (mac-1) beta subunit) (ITGB2), mRNA.	21	-0.701914	10.2605	0.00119759
ILMN_1741356	PRICKLE1	Homo sapiens prickle homolog 1 (Drosophila) (PRICKLE1), mRNA.	12	-0.657101	8.99545	0.001237
ILMN_1812926	ANTXR2	Homo sapiens anthrax toxin receptor 2 (ANTXR2), mRNA.	4	-0.751199	9.31042	0.0012452
ILMN_1790859	PLAC9	Homo sapiens placenta-specific 9 (PLAC9), mRNA.	10	-0.782949	8.23012	0.00128593
ILMN_1681503	MCM2	Homo sapiens MCM2 minichromosome maintenance deficient 2, mitotin (S. cerevisiae) (MCM2), mRNA.	3	-0.669936	9.37164	0.00129335
ILMN_1790529	LUM	Homo sapiens lumican (LUM), mRNA.	12	-1.04596	9.83448	0.00132942
ILMN_1687652	TGFB3	Homo sapiens transforming growth factor, beta 3 (TGFB3), mRNA.	14	-0.68008	8.74079	0.00141275
ILMN_1771919	LOC652694	PREDICTED: Homo sapiens similar to Ig kappa chain V-I region HK102 precursor (LOC652694), mRNA.		-0.911411	8.47509	0.00147592
ILMN_1797875	ALOX5AP	Homo sapiens arachidonate 5-lipoxygenase-activating protein (ALOX5AP), mRNA.	13	-0.730218	9.58691	0.00149096
ILMN_1690939	ECGF1	Homo sapiens endothelial cell growth factor 1 (platelet-derived) (ECGF1), mRNA.	22	-0.618782	8.57018	0.00151896
ILMN_1759330	KIF1A	Homo sapiens kinesin family member 1A (KIF1A), mRNA.	2	-0.867211	7.94042	0.00156482
ILMN_1660086	MYH11	Homo sapiens myosin, heavy chain 11, smooth muscle (MYH11), transcript variant SM2B, mRNA.	16	-1.17136	10.8078	0.00159402
ILMN_1680948	LMOD1	Homo sapiens leiomodin 1 (smooth muscle) (LMOD1), mRNA.		-0.660485	7.7977	0.00162648
ILMN_1806403	RASL12	Homo sapiens RAS-like, family 12 (RASL12), mRNA.	15	-0.71316	8.64836	0.0016996
ILMN_1701748	DCN	Homo sapiens decorin (DCN), transcript variant A1, mRNA.	12	-0.816214	10.1505	0.00170065
ILMN_1694906	APEG1	Homo sapiens aortic preferentially expressed gene 1 (APEG1), mRNA.	2	-0.79998	8.55691	0.00176218
ILMN_1719256	CKS1B	Homo sapiens CDC28 protein kinase regulatory subunit 1B (CKS1B), mRNA.	1	-0.701552	10.6325	0.00184786
ILMN_1775501	IL1B	Homo sapiens interleukin 1, beta (IL1B), mRNA.	2	-0.651682	8.31352	0.00185823
ILMN_1707475	UBE2E2	Homo sapiens ubiquitin-conjugating enzyme E2E 2 (UBC4/5 homolog, yeast) (UBE2E2), mRNA.	3	-0.720756	9.26636	0.00187841
ILMN_1759766	CTXN1	Homo sapiens cortexin 1 (CTXN1), mRNA.	19	-0.612264	9.73812	0.00193245
ILMN_1765310	TCEAL2	Homo sapiens transcription elongation factor A (SII)-like 2 (TCEAL2), mRNA.	X	-0.727067	7.79242	0.00194114
ILMN_1695658	KIF20A	Homo sapiens kinesin family member 20A (KIF20A), mRNA.	5	-0.719613	9.1603	0.00206871
ILMN_1806040	TYMS	Homo sapiens thymidylate synthetase (TYMS), mRNA.	18	-0.641661	9.96606	0.00213844
ILMN_1788874	SERPINA3	Homo sapiens serpin peptidase inhibitor, clade A (alpha-1 antiproteinase, antitrypsin), member 3 (SERPINA3), mRNA.	14	-0.977078	8.63297	0.00219109
ILMN_1671149	MEG3	Homo sapiens maternally expressed 3 (MEG3) on chromosome 14. XR_001346-XR_001372	14	-0.618163	8.0817	0.00252812
ILMN_1721354	KRT6B	Homo sapiens keratin 6B (KRT6B), mRNA.		-0.874613	7.75855	0.00256078
ILMN_1667692	PTGIS	Homo sapiens prostaglandin I2 (prostacyclin) synthase (PTGIS), mRNA.	20	-0.759496	8.1117	0.00261758
ILMN_1804601	LOC649923	PREDICTED: Homo sapiens similar to Ig gamma-2 chain C region (LOC649923), mRNA.		-0.782913	8.04127	0.00273905
ILMN_1822155		Homo sapiens mRNA; cDNA DKFZp686F09166 (from clone DKFZp686F09166)		-0.701231	10.0619	0.00299715
ILMN_1737988	PRNP	Homo sapiens prion protein (p27-30) (Creutzfeldt-Jakob disease, Gerstmann-Strausler-Scheinker syndrome, fatal familial insomnia) (PRNP), transcript variant 3, mRNA.		-0.604995	12.1688	0.00327736
ILMN_1676822	C2orf40	Homo sapiens chromosome 2 open reading frame 40 (C2orf40), mRNA.	2	-0.703354	7.50448	0.00329387
ILMN_1739508	LOC652493	PREDICTED: Homo sapiens similar to Ig kappa chain V-I region HK102 precursor (LOC652493), mRNA.		-0.976225	8.86721	0.00337765
ILMN_1651354	SPP1	Homo sapiens secreted phosphoprotein 1 (osteopontin, bone sialoprotein I, early T-lymphocyte activation 1) (SPP1), transcript variant 2, mRNA.	4	-0.825106	9.47703	0.00348272
ILMN_1693338	CYP1B1	Homo sapiens cytochrome P450, family 1, subfamily B, polypeptide 1 (CYP1B1), mRNA.	2	-0.678583	8.0443	0.00361371
ILMN_1677038	FLJ21986	Homo sapiens hypothetical protein FLJ21986 (FLJ21986), mRNA.	7	-0.611035	8.46873	0.00362934
ILMN_1778523	KLF9	Homo sapiens Kruppel-like factor 9 (KLF9), mRNA.	9	-0.672715	9.63103	0.00371753
ILMN_1681737	TMSL8	Homo sapiens thymosin-like 8 (TMSL8), mRNA.	X	-0.711199	8.03539	0.00403285
ILMN_1760347	SRGN	Homo sapiens serglycin (SRGN), mRNA.	10	-0.705056	9.65745	0.00407231
ILMN_1699214	LOC647450	PREDICTED: Homo sapiens similar to Ig kappa chain V-I region HK101 precursor (LOC647450), mRNA.		-0.846953	8.75291	0.00407552
ILMN_1688566	EPSTI1	Homo sapiens epithelial stromal interaction 1 (breast) (EPSTI1), transcript variant 1, mRNA.	13	-0.640717	9.69842	0.00411509
ILMN_1757406	HIST1H1C	Homo sapiens histone cluster 1, H1c (HIST1H1C), mRNA.	6	-0.716389	11.1486	0.00419245
ILMN_1748538	ALDH1A2	Homo sapiens aldehyde dehydrogenase 1 family, member A2 (ALDH1A2), transcript variant 2, mRNA.	15	-0.608755	8.51467	0.00430699
ILMN_1791759	CXCL10	Homo sapiens chemokine (C-X-C motif) ligand 10 (CXCL10), mRNA.	4	-0.684273	8.91236	0.00430982
ILMN_1742981	TUBA1A	Homo sapiens tubulin, alpha 1a (TUBA1A), mRNA.	12	-0.664132	11.7285	0.00434716
ILMN_1767446	RNF150	Homo sapiens ring finger protein 150 (RNF150), mRNA.	4	-0.677565	8.82945	0.00440253
ILMN_1666221	ANKRD19	Homo sapiens ankyrin repeat domain 19 (ANKRD19), mRNA.		-0.714045	8.05442	0.00446516
ILMN_1770616	C12orf56	PREDICTED: Homo sapiens chromosome 12 open reading frame 56 (C12orf56), mRNA.		-0.604388	7.91691	0.00454557
ILMN_1747911	CDC2	Homo sapiens cell division cycle 2, G1 to S and G2 to M (CDC2), transcript variant 2, mRNA.	10	-0.610567	8.4537	0.00457938
ILMN_1662419	COX7A1	Homo sapiens cytochrome c oxidase subunit VIIa polypeptide 1 (muscle) (COX7A1), mRNA.	19	-0.633588	9.18594	0.00469287
ILMN_1675062	MYL9	Homo sapiens myosin, light chain 9, regulatory (MYL9), transcript variant 2, mRNA.	20	-0.729314	9.05667	0.00489123
ILMN_1720373	SLC7A5	Homo sapiens solute carrier family 7 (cationic amino acid transporter, y+ system), member 5 (SLC7A5), mRNA.	16	-0.60661	10.8189	0.00511347
ILMN_1701731	AKR1B1	Homo sapiens aldo-keto reductase family 1, member B1 (aldose reductase) (AKR1B1), mRNA.	7	-0.618837	11.5232	0.00537004
ILMN_1723042	CLDN3	Homo sapiens claudin 3 (CLDN3), mRNA.	7	-0.635846	8.85679	0.00553135
ILMN_1695414	ASF1B	Homo sapiens ASF1 anti-silencing function 1 homolog B (S. cerevisiae) (ASF1B), mRNA.	19	-0.611727	9.12442	0.00601475
ILMN_1717297	TNNT1	Homo sapiens troponin T type 1 (skeletal, slow) (TNNT1), mRNA.	19	-0.847682	8.77697	0.00720295
ILMN_1800091	RARRES1	Homo sapiens retinoic acid receptor responder (tazarotene induced) 1 (RARRES1), transcript variant 1, mRNA.	3	-1.05426	9.74576	0.00788329
ILMN_1759097	MLLT11	Homo sapiens myeloid/lymphoid or mixed-lineage leukemia (trithorax homolog, Drosophila); translocated to, 11 (MLLT11), mRNA.	1	-0.609634	9.87267	0.00813979
ILMN_1680512	MMP12	Homo sapiens matrix metallopeptidase 12 (macrophage elastase) (MMP12), mRNA.	11	-0.656129	8.38655	0.0086799
ILMN_1691290	CELSR3	Homo sapiens cadherin, EGF LAG seven-pass G-type receptor 3 (flamingo homolog, Drosophila) (CELSR3), mRNA.	3	-0.667144	9.92612	0.00882244
ILMN_1801246	IFITM1	Homo sapiens interferon induced transmembrane protein 1 (9-27) (IFITM1), mRNA.	11	-0.629486	10.9258	0.00884916
ILMN_1678842	THBS2	Homo sapiens thrombospondin 2 (THBS2), mRNA.	6	-0.786328	10.6538	0.00974832

## Sheet: Kim Invasive Down
ID	Symbol	Gene Title	Chromosome	logFC	AveExpr	adj.P.Val
ILMN_1692665	UNC5B	Homo sapiens unc-5 homolog B (C. elegans) (UNC5B), mRNA.	10	1.0051	8.47242	3.48537e-10
ILMN_1713496	ST3GAL5	Homo sapiens ST3 beta-galactoside alpha-2,3-sialyltransferase 5 (ST3GAL5), transcript variant 1, mRNA.		1.59577	11.5978	5.59421e-10
ILMN_1658384	CRTAC1	Homo sapiens cartilage acidic protein 1 (CRTAC1), mRNA.	10	2.69918	10.7709	5.69684e-09
ILMN_1776647	BCAS1	Homo sapiens breast carcinoma amplified sequence 1 (BCAS1), mRNA.	20	1.46306	10.7793	7.01541e-09
ILMN_1754538	C10orf58	Homo sapiens chromosome 10 open reading frame 58 (C10orf58), mRNA.	10	1.03217	11.7655	7.46508e-09
ILMN_1802360	KRTAP5-2	Homo sapiens keratin associated protein 5-2 (KRTAP5-2), mRNA.	11	0.887729	8.02255	7.96204e-09
ILMN_1656368	ALDH4A1	Homo sapiens aldehyde dehydrogenase 4 family, member A1 (ALDH4A1), nuclear gene encoding mitochondrial protein, transcript variant P5CDhL, mRNA.	1	0.997617	10.6063	9.48294e-09
ILMN_1907042		Homo sapiens cDNA FLJ41270 fis, clone BRAMY2036387		1.13465	10.4654	9.99873e-09
ILMN_1803219	TMC4	Homo sapiens transmembrane channel-like 4 (TMC4), mRNA.	19	0.836871	10.1856	1.10452e-08
ILMN_1654065	ATOH8	Homo sapiens atonal homolog 8 (Drosophila) (ATOH8), mRNA.	2	1.37123	9.40582	1.15523e-08
ILMN_1721978	CARD11	Homo sapiens caspase recruitment domain family, member 11 (CARD11), mRNA.	7	1.15654	10.8321	2.25096e-08
ILMN_1652797	LOC400451	Homo sapiens hypothetical gene supported by AK075564; BC060873 (LOC400451), mRNA.	15	1.26881	11.8938	2.25096e-08
ILMN_1750785	SYTL1	Homo sapiens synaptotagmin-like 1 (SYTL1), mRNA.	1	1.08219	10.4115	2.25096e-08
ILMN_1858631		DB303081 BRAMY3 Homo sapiens cDNA clone BRAMY3003460 3, mRNA sequence		1.50431	9.17212	2.46425e-08
ILMN_1702899	PLEKHA7	Homo sapiens pleckstrin homology domain containing, family A member 7 (PLEKHA7), mRNA.	11	0.61741	9.41509	2.78637e-08
ILMN_1732296	ID3	Homo sapiens inhibitor of DNA binding 3, dominant negative helix-loop-helix protein (ID3), mRNA.	1	1.06939	11.2888	3.49395e-08
ILMN_1690454	C3orf54	Homo sapiens chromosome 3 open reading frame 54 (C3orf54), mRNA.	3	1.11757	10.0862	3.51254e-08
ILMN_1906158		Homo sapiens cDNA FLJ33158 fis, clone UTERU2000418		0.651021	8.17188	4.38078e-08
ILMN_1760285	MGC35402	Homo sapiens hypothetical protein MGC35402 (MGC35402), mRNA.	19	0.987794	9.05485	4.38078e-08
ILMN_1689306	TMC7	Homo sapiens transmembrane channel-like 7 (TMC7), mRNA.	16	0.857484	9.1477	4.38078e-08
ILMN_1750181	TESC	Homo sapiens tescalcin (TESC), mRNA.		1.84258	11.6267	6.43713e-08
ILMN_1873568		im10c11.y1 Human insulinoma Homo sapiens cDNA clone IMAGE:6034580 5, mRNA sequence		0.859925	9.54358	6.43713e-08
ILMN_1880922		xp64e03.x1 NCI_CGAP_Ov39 Homo sapiens cDNA clone IMAGE:2745148 3, mRNA sequence		1.14857	8.29521	6.71573e-08
ILMN_1699254	PLEKHH1	Homo sapiens pleckstrin homology domain containing, family H (with MyTH4 domain) member 1 (PLEKHH1), mRNA.		0.90124	10.1958	6.71573e-08
ILMN_1777740	C8orf55	Homo sapiens chromosome 8 open reading frame 55 (C8orf55), mRNA.	8	0.877235	12.5531	6.78587e-08
ILMN_1862773		RC0-BN0329-210600-031-f07 BN0329 Homo sapiens cDNA, mRNA sequence		1.38666	11.4325	7.09361e-08
ILMN_1724211	GPRC5C	Homo sapiens G protein-coupled receptor, family C, group 5, member C (GPRC5C), transcript variant 1, mRNA.	17	0.616694	8.65352	9.23777e-08
ILMN_1813197	SLITRK6	Homo sapiens SLIT and NTRK-like family, member 6 (SLITRK6), mRNA.	13	1.40872	9.85503	1.01316e-07
ILMN_1759818	SORL1	Homo sapiens sortilin-related receptor, L(DLR class) A repeats-containing (SORL1), mRNA.	11	1.00992	10.2862	1.19564e-07
ILMN_1726196	GATA2	Homo sapiens GATA binding protein 2 (GATA2), mRNA.	3	1.21152	9.88709	1.41777e-07
ILMN_1859787		BX105743 NCI_CGAP_GC6 Homo sapiens cDNA clone IMAGp998H135716, mRNA sequence		0.798079	9.13448	1.41777e-07
ILMN_1806149	C16orf74	Homo sapiens chromosome 16 open reading frame 74 (C16orf74), mRNA.	16	0.79614	9.25424	1.41777e-07
ILMN_1719649	TMEM63A	Homo sapiens transmembrane protein 63A (TMEM63A), mRNA.	1	0.894944	10.0362	1.73717e-07
ILMN_1699085	C8orf16	Homo sapiens chromosome 8 open reading frame 16 (C8orf16), mRNA.	8	1.09248	9.44794	2.0011e-07
ILMN_1733627	NEDD4L	Homo sapiens neural precursor cell expressed, developmentally down-regulated 4-like (NEDD4L), mRNA.	18	0.86218	11.1018	2.4192e-07
ILMN_1755234	SSH3	Homo sapiens slingshot homolog 3 (Drosophila) (SSH3), mRNA.	11	0.99313	11.5472	2.86123e-07
ILMN_1767068	SMAD6	Homo sapiens SMAD family member 6 (SMAD6), mRNA.	15	1.04687	9.85721	2.93865e-07
ILMN_1900110		BX099724 Soares_fetal_liver_spleen_1NFLS_S1 Homo sapiens cDNA clone IMAGp998F201004, mRNA sequence		1.13115	10.5713	3.40951e-07
ILMN_1804662	NRG4	Homo sapiens neuregulin 4 (NRG4), mRNA.	15	0.666986	8.53491	3.61856e-07
ILMN_1774982	CDC42EP5	Homo sapiens CDC42 effector protein (Rho GTPase binding) 5 (CDC42EP5), mRNA.	19	1.29645	12.0538	3.736e-07
ILMN_1761946	PROM2	Homo sapiens prominin 2 (PROM2), mRNA.	2	1.10133	13.3883	4.17522e-07
ILMN_1676727	TMPRSS4	Homo sapiens transmembrane protease, serine 4 (TMPRSS4), transcript variant 2, mRNA.	11	1.68666	11.6518	4.24948e-07
ILMN_1803367	EVI1	Homo sapiens ecotropic viral integration site 1 (EVI1), mRNA.	3	1.00505	12.8679	4.36294e-07
ILMN_1772627	D4S234E	Homo sapiens DNA segment on chromosome 4 (unique) 234 expressed sequence (D4S234E), mRNA.	4	1.52984	11.0866	4.84351e-07
ILMN_1800425	SLC9A1	Homo sapiens solute carrier family 9 (sodium/hydrogen exchanger), member 1 (antiporter, Na+/H+, amiloride sensitive) (SLC9A1), mRNA.	1	0.797776	12.4609	4.9856e-07
ILMN_1677684	BTBD16	Homo sapiens BTB (POZ) domain containing 16 (BTBD16), mRNA.	10	1.82309	11.7127	5.11786e-07
ILMN_1707088	DENND2D	Homo sapiens DENN/MADD domain containing 2D (DENND2D), mRNA.	1	1.0251	11.4254	5.40371e-07
ILMN_1710523	ATP8B1	Homo sapiens ATPase, Class I, type 8B, member 1 (ATP8B1), mRNA.		0.699604	8.8943	5.50878e-07
ILMN_1664646	NSUN6	Homo sapiens NOL1/NOP2/Sun domain family, member 6 (NSUN6), mRNA.	10	0.624807	10.2855	5.87407e-07
ILMN_1802192	C10orf99	Homo sapiens chromosome 10 open reading frame 99 (C10orf99), mRNA.		1.76637	11.301	5.98774e-07
ILMN_1799887	CTSE	Homo sapiens cathepsin E (CTSE), transcript variant 1, mRNA.	1	1.77069	9.52921	5.98774e-07
ILMN_1796737	APM-1	PREDICTED: Homo sapiens BTB/POZ-zinc finger protein-like (APM-1), mRNA.	18	0.985329	9.7817	5.98774e-07
ILMN_1823714		BX117372 NCI_CGAP_Co4 Homo sapiens cDNA clone IMAGp998E042410, mRNA sequence		0.848868	9.52006	7.301e-07
ILMN_1804652	PLEKHH3	Homo sapiens pleckstrin homology domain containing, family H (with MyTH4 domain) member 3 (PLEKHH3), mRNA.	17	0.76513	10.7928	7.301e-07
ILMN_1661078	LOC644844	PREDICTED: Homo sapiens hypothetical LOC644844 (LOC644844), mRNA.	15	1.52052	9.18836	7.39769e-07
ILMN_1675656	PPFIBP2	Homo sapiens PTPRF interacting protein, binding protein 2 (liprin beta 2) (PPFIBP2), mRNA.	11	1.05007	12.8682	8.25355e-07
ILMN_1869943		Homo sapiens cDNA FLJ12777 fis, clone NT2RP2001720		0.779092	8.5257	8.38119e-07
ILMN_1784948	SPOCD1	Homo sapiens SPOC domain containing 1 (SPOCD1), mRNA.	1	1.85672	10.8868	8.49718e-07
ILMN_1684873	ARSD	Homo sapiens arylsulfatase D (ARSD), transcript variant 1, mRNA.	X	0.675833	10.2143	9.04561e-07
ILMN_1699421	ANXA10	Homo sapiens annexin A10 (ANXA10), mRNA.	4	2.20259	10.6162	9.04561e-07
ILMN_1666536	VSIG2	Homo sapiens V-set and immunoglobulin domain containing 2 (VSIG2), mRNA.	11	1.43189	12.9069	9.04561e-07
ILMN_1694509	SERINC2	Homo sapiens serine incorporator 2 (SERINC2), mRNA.	1	0.923317	11.7712	9.65952e-07
ILMN_1651466	ALOX5	PREDICTED: Homo sapiens arachidonate 5-lipoxygenase (ALOX5), mRNA.		0.952191	11.2513	9.94067e-07
ILMN_1681777	SHROOM2	Homo sapiens shroom family member 2 (SHROOM2), mRNA.	X	0.804923	9.84376	1.0354e-06
ILMN_1775677	TYSND1	Homo sapiens trypsin domain containing 1 (TYSND1), transcript variant 2, mRNA.	10	0.638938	11.6308	1.05858e-06
ILMN_1745079	TRIM2	Homo sapiens tripartite motif-containing 2 (TRIM2), mRNA.	4	0.832081	10.5425	1.13969e-06
ILMN_1726809	BHLHB3	Homo sapiens basic helix-loop-helix domain containing, class B, 3 (BHLHB3), mRNA.	12	1.02363	9.91964	1.19833e-06
ILMN_1805561	SLC14A1	Homo sapiens solute carrier family 14 (urea transporter), member 1 (Kidd blood group) (SLC14A1), mRNA.	18	1.52375	11.2486	1.35005e-06
ILMN_1689874	HOXB3	Homo sapiens homeobox B3 (HOXB3), mRNA.	17	0.976173	8.79679	1.38454e-06
ILMN_1808713	HSD17B2	Homo sapiens hydroxysteroid (17-beta) dehydrogenase 2 (HSD17B2), mRNA.	16	1.56637	11.4062	1.40993e-06
ILMN_1722798	PLCD3	Homo sapiens phospholipase C, delta 3 (PLCD3), mRNA.		0.890661	10.0902	1.41044e-06
ILMN_1717381	HOXD1	Homo sapiens homeobox D1 (HOXD1), mRNA.	2	1.10474	9.0543	1.41759e-06
ILMN_1881266		wh83c05.x1 NCI_CGAP_CLL1 Homo sapiens cDNA clone IMAGE:2387336 3, mRNA sequence		0.65376	8.37988	1.56306e-06
ILMN_1911719		Homo sapiens mRNA; cDNA DKFZp686J19209 (from clone DKFZp686J19209)		0.658796	8.58915	1.57224e-06
ILMN_1699357	SLC22A5	Homo sapiens solute carrier family 22 (organic cation transporter), member 5 (SLC22A5), mRNA.	5	0.650952	9.89055	1.66085e-06
ILMN_1682996	LOH11CR2A	Homo sapiens loss of heterozygosity, 11, chromosomal region 2, gene A (LOH11CR2A), transcript variant 2, mRNA.	11	0.838804	9.40394	1.92752e-06
ILMN_1721559	FABP6	Homo sapiens fatty acid binding protein 6, ileal (gastrotropin) (FABP6), transcript variant 1, mRNA.	5	1.19849	9.8917	1.944e-06
ILMN_1726547	MAP3K5	Homo sapiens mitogen-activated protein kinase kinase kinase 5 (MAP3K5), mRNA.	6	0.807133	11.3479	1.96332e-06
ILMN_1728710	ZNF816A	Homo sapiens zinc finger protein 816A (ZNF816A), mRNA.	19	0.687596	10.6365	2.18022e-06
ILMN_1737110	LOC651957	PREDICTED: Homo sapiens hypothetical protein LOC651957 (LOC651957), mRNA.		1.32733	8.93406	2.34896e-06
ILMN_1811181	FLJ20444	PREDICTED: Homo sapiens hypothetical protein FLJ20444, transcript variant 2 (FLJ20444), mRNA.	9	0.699516	10.3872	2.71885e-06
ILMN_1788637	ZNF440	Homo sapiens zinc finger protein 440 (ZNF440), mRNA.	19	0.680045	9.06855	3.28708e-06
ILMN_1687037	IFT140	Homo sapiens intraflagellar transport 140 homolog (Chlamydomonas) (IFT140), mRNA.	16	0.832488	9.17855	3.34917e-06
ILMN_1731699	RAB15	Homo sapiens RAB15, member RAS onocogene family (RAB15), mRNA.	14	0.853793	11.1249	3.56412e-06
ILMN_1679322	SH2D4A	Homo sapiens SH2 domain containing 4A (SH2D4A), mRNA.	8	0.774773	10.0085	3.59082e-06
ILMN_1726114	SLC45A3	Homo sapiens solute carrier family 45, member 3 (SLC45A3), mRNA.	1	0.960296	9.78091	3.60119e-06
ILMN_1762561	PLA2G10	Homo sapiens phospholipase A2, group X (PLA2G10), mRNA.	16	1.19765	10.2628	3.80369e-06
ILMN_1775330	FLJ43339	Homo sapiens FLJ43339 protein (FLJ43339), mRNA.	15	1.13589	12.0584	4.41064e-06
ILMN_1681130	ACP6	Homo sapiens acid phosphatase 6, lysophosphatidic (ACP6), mRNA.	1	0.674867	10.8452	4.41064e-06
ILMN_1788942	GGT6	Homo sapiens gamma-glutamyltransferase 6 homolog (rat) (GGT6), mRNA.	17	1.03514	10.2847	4.7438e-06
ILMN_1709017	APOL1	Homo sapiens apolipoprotein L, 1 (APOL1), transcript variant 2, mRNA.	22	0.81397	8.72473	4.745e-06
ILMN_1719986	MGC17330	Homo sapiens HGFL gene (MGC17330), mRNA.	22	0.72539	11.3683	4.79544e-06
ILMN_1717599	CNTN3	Homo sapiens contactin 3 (plasmacytoma associated) (CNTN3), mRNA.	3	0.852996	8.11812	5.17767e-06
ILMN_1752451	CTSH	Homo sapiens cathepsin H (CTSH), transcript variant 2, mRNA.	15	0.916344	11.3722	5.22692e-06
ILMN_1789186	OBFC1	Homo sapiens oligonucleotide/oligosaccharide-binding fold containing 1 (OBFC1), mRNA.	10	0.623608	10.5241	5.36545e-06
ILMN_1813100	KIAA1244	Homo sapiens KIAA1244 (KIAA1244), mRNA.	6	0.644145	9.54291	5.43316e-06
ILMN_1703494	LOC642299	PREDICTED: Homo sapiens hypothetical protein LOC642299 (LOC642299), mRNA.	1	1.32737	8.9257	5.53556e-06
ILMN_1797557	PLEKHA6	Homo sapiens pleckstrin homology domain containing, family A member 6 (PLEKHA6), mRNA.	1	0.725166	10.309	5.77348e-06
ILMN_1802167	ALDH1L1	Homo sapiens aldehyde dehydrogenase 1 family, member L1 (ALDH1L1), mRNA.	3	1.48298	11.0751	5.92477e-06
ILMN_1758613	RAPGEFL1	Homo sapiens Rap guanine nucleotide exchange factor (GEF)-like 1 (RAPGEFL1), mRNA.	17	1.03101	11.6447	6.42255e-06
ILMN_1776483	LOC728790	PREDICTED: Homo sapiens hypothetical protein LOC728790, transcript variant 2 (LOC728790), mRNA.	17	0.620626	8.77097	6.60047e-06
ILMN_1723324	CAPS	Homo sapiens calcyphosine (CAPS), transcript variant 1, mRNA.	19	0.910236	10.8413	7.3131e-06
ILMN_1776396	HOXB4	Homo sapiens homeobox B4 (HOXB4), mRNA.	17	0.694003	9.18	7.40522e-06
ILMN_1690304	MGC26718	Homo sapiens similar to ankyrin repeat domain 20A (MGC26718), mRNA.	18	1.26006	9.87545	7.45046e-06
ILMN_1653039	LOC642934	PREDICTED: Homo sapiens hypothetical LOC642934 (LOC642934), mRNA.		0.649828	12.8224	7.55177e-06
ILMN_1664861	ID1	Homo sapiens inhibitor of DNA binding 1, dominant negative helix-loop-helix protein (ID1), transcript variant 2, mRNA.	20	0.95277	12.4207	7.84907e-06
ILMN_1862415		BX115799 Soares_fetal_heart_NbHH19W Homo sapiens cDNA clone IMAGp998C21778, mRNA sequence		0.637186	8.39824	8.29416e-06
ILMN_1810537	PRSS16	Homo sapiens protease, serine, 16 (thymus) (PRSS16), mRNA.	6	0.68378	9.72491	8.56339e-06
ILMN_1768953	SDC1	Homo sapiens syndecan 1 (SDC1), transcript variant 2, mRNA.	2	0.790795	12.4595	8.58903e-06
ILMN_1839380		BX111520 Soares placenta Nb2HP Homo sapiens cDNA clone IMAGp998L15208, mRNA sequence		0.832383	10.0861	8.77475e-06
ILMN_1677814	ABCC3	Homo sapiens ATP-binding cassette, sub-family C (CFTR/MRP), member 3 (ABCC3), mRNA.	17	1.03838	11.2569	8.84419e-06
ILMN_1740234	GSTO2	Homo sapiens glutathione S-transferase omega 2 (GSTO2), mRNA.	10	0.734208	11.5985	9.28996e-06
ILMN_1724299	C21orf81	PREDICTED: Homo sapiens chromosome 21 open reading frame 81 (C21orf81), mRNA.		1.07412	10.2036	9.51969e-06
ILMN_1713952	C1orf106	Homo sapiens chromosome 1 open reading frame 106 (C1orf106), mRNA.	1	0.808946	11.9493	9.52706e-06
ILMN_1685725	ILDR1	Homo sapiens immunoglobulin-like domain containing receptor 1 (ILDR1), mRNA.	3	0.739756	9.9963	1.02159e-05
ILMN_1710458	LOC646990	PREDICTED: Homo sapiens hypothetical protein LOC646990 (LOC646990), mRNA.	13	0.61508	8.01364	1.07788e-05
ILMN_1665372	FXYD3	Homo sapiens FXYD domain containing ion transport regulator 3 (FXYD3), transcript variant 2, mRNA.	19	0.820507	9.88897	1.09057e-05
ILMN_1779800	MARK1	Homo sapiens MAP/microtubule affinity-regulating kinase 1 (MARK1), mRNA.	1	0.730227	9.416	1.15076e-05
ILMN_1726678	HSPC047	Homo sapiens HSPC047 protein (HSPC047), mRNA.	7	0.627419	8.29424	1.15076e-05
ILMN_1697448	TXNIP	Homo sapiens thioredoxin interacting protein (TXNIP), mRNA.	1	0.616428	14.2711	1.18673e-05
ILMN_1758731	CYP2J2	Homo sapiens cytochrome P450, family 2, subfamily J, polypeptide 2 (CYP2J2), mRNA.	1	1.01698	11.6105	1.19959e-05
ILMN_1805905	CAT	Homo sapiens catalase (CAT), mRNA.	11	0.660418	11.1915	1.24305e-05
ILMN_1766951	MSX2	Homo sapiens msh homeobox 2 (MSX2), mRNA.	5	0.676788	9.47006	1.24383e-05
ILMN_1713449	TBX3	Homo sapiens T-box 3 (ulnar mammary syndrome) (TBX3), transcript variant 1, mRNA.	12	0.719413	11.0676	1.24547e-05
ILMN_1700384	KIAA1522	Homo sapiens KIAA1522 (KIAA1522), mRNA.		0.661863	11.509	1.26924e-05
ILMN_1804445	ATF7IP2	Homo sapiens activating transcription factor 7 interacting protein 2 (ATF7IP2), mRNA.	16	0.924433	10.6869	1.26931e-05
ILMN_1657128	PTPRU	Homo sapiens protein tyrosine phosphatase, receptor type, U (PTPRU), transcript variant 1, mRNA.		0.610213	9.26673	1.29324e-05
ILMN_1712231	SH3YL1	Homo sapiens SH3 domain containing, Ysc84-like 1 (S. cerevisiae) (SH3YL1), mRNA.	2	0.703014	12.1203	1.29324e-05
ILMN_1786722	ZNF385	Homo sapiens zinc finger protein 385 (ZNF385), mRNA.	12	0.826647	9.46006	1.40326e-05
ILMN_1756541	MXD4	Homo sapiens MAX dimerization protein 4 (MXD4), mRNA.	4	0.645714	12.3087	1.40872e-05
ILMN_1889229		BX107795 Soares breast 3NbHBst Homo sapiens cDNA clone IMAGp998G11259, mRNA sequence		0.765183	9.52927	1.46292e-05
ILMN_1783149	CDH23	Homo sapiens cadherin-like 23 (CDH23), transcript variant 1, mRNA.	10	0.925047	9.01697	1.61035e-05
ILMN_1665260	FLJ25996	Homo sapiens FLJ25996 protein (FLJ25996), mRNA.	3	0.673877	8.98873	1.71416e-05
ILMN_1911040		BX109229 NCI_CGAP_GCB1 Homo sapiens cDNA clone IMAGp998K073291, mRNA sequence		0.612842	8.50079	1.72728e-05
ILMN_1657760	SYT17	Homo sapiens synaptotagmin XVII (SYT17), mRNA.	16	0.806082	10.0325	1.73964e-05
ILMN_1661658	SNAI3	Homo sapiens snail homolog 3 (Drosophila) (SNAI3), mRNA.		0.624668	8.26236	1.75094e-05
ILMN_1741755	TRIM29	Homo sapiens tripartite motif-containing 29 (TRIM29), mRNA.		0.725645	9.44733	1.79597e-05
ILMN_1683494	TMEM154	Homo sapiens transmembrane protein 154 (TMEM154), mRNA.	4	0.825972	10.3511	1.85361e-05
ILMN_1651574	AQP3	Homo sapiens aquaporin 3 (Gill blood group) (AQP3), mRNA.	9	1.35292	10.1655	1.8724e-05
ILMN_1793990	ID2	Homo sapiens inhibitor of DNA binding 2, dominant negative helix-loop-helix protein (ID2), mRNA.	2	0.841934	11.2632	1.94679e-05
ILMN_1722726	RICS	Homo sapiens Rho GTPase-activating protein (RICS), mRNA.	11	0.64205	11.1242	1.96399e-05
ILMN_1770102	FLJ21687	Homo sapiens PDZ domain containing, X chromosome (FLJ21687), mRNA.	X	0.649068	9.12727	1.97818e-05
ILMN_1653161	SNCG	Homo sapiens synuclein, gamma (breast cancer-specific protein 1) (SNCG), mRNA.	10	1.04067	10.8082	1.98212e-05
ILMN_1717326	SLC29A3	Homo sapiens solute carrier family 29 (nucleoside transporters), member 3 (SLC29A3), mRNA.	10	0.711544	9.63127	2.07477e-05
ILMN_1664138	DKFZP686A01247	Homo sapiens hypothetical protein (DKFZP686A01247), mRNA.	4	0.846697	10.9981	2.07595e-05
ILMN_1768052	FARP2	Homo sapiens FERM, RhoGEF and pleckstrin domain protein 2 (FARP2), mRNA.	2	0.624438	8.73109	2.08789e-05
ILMN_1813400	CBR4	Homo sapiens carbonyl reductase 4 (CBR4), mRNA.	4	0.626514	9.764	2.13352e-05
ILMN_1674908	HOXB5	Homo sapiens homeobox B5 (HOXB5), mRNA.	17	1.27988	11.6327	2.13893e-05
ILMN_1728799	FBP1	Homo sapiens fructose-1,6-bisphosphatase 1 (FBP1), mRNA.	9	1.0902	12.152	2.17307e-05
ILMN_1775114	ENTPD3	Homo sapiens ectonucleoside triphosphate diphosphohydrolase 3 (ENTPD3), mRNA.	3	0.897985	9.32782	2.17742e-05
ILMN_1785424	ABLIM1	Homo sapiens actin binding LIM protein 1 (ABLIM1), transcript variant 4, mRNA.	10	0.625824	10.8602	2.21123e-05
ILMN_1652805	PTPN13	Homo sapiens protein tyrosine phosphatase, non-receptor type 13 (APO-1/CD95 (Fas)-associated phosphatase) (PTPN13), transcript variant 4, mRNA.	4	0.847986	10.3471	2.22374e-05
ILMN_1725560	TP73L	Homo sapiens tumor protein p73-like (TP73L), mRNA.	3	1.11914	11.102	2.27759e-05
ILMN_1782389	LAD1	Homo sapiens ladinin 1 (LAD1), mRNA.	1	0.838774	11.6647	2.31343e-05
ILMN_1880280		Homo sapiens cDNA: FLJ22140 fis, clone HEP20977		0.6087	11.2984	2.41959e-05
ILMN_1764508	PTK6	Homo sapiens PTK6 protein tyrosine kinase 6 (PTK6), mRNA.	20	0.882869	9.97758	2.539e-05
ILMN_1899317		BX118287 Soares placenta Nb2HP Homo sapiens cDNA clone IMAGp998N04207, mRNA sequence		0.73946	10.0047	2.60245e-05
ILMN_1814151	AGR2	Homo sapiens anterior gradient homolog 2 (Xenopus laevis) (AGR2), mRNA.	7	0.950114	10.1684	2.62605e-05
ILMN_1737269	PLA2G4F	Homo sapiens phospholipase A2, group IVF (PLA2G4F), mRNA.	15	0.629549	8.74364	2.67828e-05
ILMN_1770641	KLHL3	Homo sapiens kelch-like 3 (Drosophila) (KLHL3), mRNA.	5	0.775785	10.3817	2.74661e-05
ILMN_1837923		AGENCOURT_14540191 NIA Human H1 Embryonic Stem Cell cDNA Library (Long) Homo sapiens cDNA clone IMAGE:30421215 5, mRNA sequence		0.633791	9.02709	3.02566e-05
ILMN_1707959	VIPR1	Homo sapiens vasoactive intestinal peptide receptor 1 (VIPR1), mRNA.	3	0.942363	10.4584	3.21641e-05
ILMN_1664392	DUOX1	Homo sapiens dual oxidase 1 (DUOX1), transcript variant 2, mRNA.	15	0.920385	9.79358	3.33226e-05
ILMN_1665331	AMT	Homo sapiens aminomethyltransferase (AMT), mRNA.	3	0.721569	11.1753	3.45568e-05
ILMN_1699809	CAPNS2	Homo sapiens calpain, small subunit 2 (CAPNS2), mRNA.	16	1.06889	10.0227	3.64601e-05
ILMN_1718771	CCDC24	Homo sapiens coiled-coil domain containing 24 (CCDC24), mRNA.	1	0.692866	10.808	3.7818e-05
ILMN_1784783	NME5	Homo sapiens non-metastatic cells 5, protein expressed in (nucleoside-diphosphate kinase) (NME5), mRNA.	5	0.656367	7.77715	3.78208e-05
ILMN_1663640	MAOA	Homo sapiens monoamine oxidase A (MAOA), nuclear gene encoding mitochondrial protein, mRNA.	X	0.702662	12.9312	3.96665e-05
ILMN_1662776	GPX2	Homo sapiens glutathione peroxidase 2 (gastrointestinal) (GPX2), mRNA.	14	1.13401	13.8566	4.16489e-05
ILMN_1758299	AP1G2	Homo sapiens adaptor-related protein complex 1, gamma 2 subunit (AP1G2), transcript variant 2, mRNA.	14	0.688481	10.7604	4.18509e-05
ILMN_1878567		Homo sapiens full length insert cDNA clone ZD67H01		0.623696	8.22127	4.47318e-05
ILMN_1684497	C10orf33	Homo sapiens chromosome 10 open reading frame 33 (C10orf33), mRNA.	10	0.797794	10.0562	4.52407e-05
ILMN_1679184	ANKRD20A2	Homo sapiens ankyrin repeat domain 20 family, member A2 (ANKRD20A2), mRNA.	9	0.751295	8.47915	4.55634e-05
ILMN_1700728	KRTCAP3	Homo sapiens keratinocyte associated protein 3 (KRTCAP3), mRNA.	2	0.757188	10.0836	4.64381e-05
ILMN_1671971	LOC644743	PREDICTED: Homo sapiens hypothetical LOC644743 (LOC644743), mRNA.		0.839936	12.9345	4.68043e-05
ILMN_1734781	IFNE1	Homo sapiens interferon epsilon 1 (IFNE1), mRNA.	9	0.61721	7.84303	4.8195e-05
ILMN_1720433	FAM3D	Homo sapiens family with sequence similarity 3, member D (FAM3D), mRNA.	3	1.01188	9.91279	4.91952e-05
ILMN_1693090	CROT	Homo sapiens carnitine O-octanoyltransferase (CROT), mRNA.	7	0.664217	12.0477	4.96812e-05
ILMN_1695946	LOC388610	Homo sapiens hypothetical LOC388610 (LOC388610), mRNA.	1	1.11918	10.9261	5.02493e-05
ILMN_1859131		UI-H-FE1-bdt-n-08-0-UI.s1 NCI_CGAP_FE1 Homo sapiens cDNA clone UI-H-FE1-bdt-n-08-0-UI 3, mRNA sequence		0.819771	8.07109	5.04503e-05
ILMN_1811470	PLEK2	Homo sapiens pleckstrin 2 (PLEK2), mRNA.	14	0.733293	9.90533	5.27771e-05
ILMN_1801661	KRT7	Homo sapiens keratin 7 (KRT7), mRNA.	12	1.17169	12.0245	5.32361e-05
ILMN_1721218	KRT13	Homo sapiens keratin 13 (KRT13), transcript variant 2, mRNA.	17	1.86536	13.4007	5.43113e-05
ILMN_1881865		Homo sapiens cDNA FLJ20832 fis, clone ADKA03033		1.17522	9.82588	5.82779e-05
ILMN_1690209	C1orf186	Homo sapiens chromosome 1 open reading frame 186 (C1orf186), mRNA.	1	1.08752	8.39242	6.34043e-05
ILMN_1687867	LOC647954	PREDICTED: Homo sapiens similar to keratin 8 (LOC647954), mRNA.		0.690661	11.4353	6.42924e-05
ILMN_1788457	ABCC4	Homo sapiens ATP-binding cassette, sub-family C (CFTR/MRP), member 4 (ABCC4), mRNA.	13	0.866499	9.64897	7.05061e-05
ILMN_1690923	CAPN9	Homo sapiens calpain 9 (CAPN9), transcript variant 2, mRNA.	1	1.04245	8.39897	7.18772e-05
ILMN_1682354	SNORD33	Homo sapiens small nucleolar RNA, C/D box 33 (SNORD33) on chromosome 19.	19	1.04848	9.61467	7.18772e-05
ILMN_1721106	C14orf159	Homo sapiens chromosome 14 open reading frame 159 (C14orf159), mRNA.	14	0.730291	11.3359	7.68023e-05
ILMN_1752478	DHRS3	Homo sapiens dehydrogenase/reductase (SDR family) member 3 (DHRS3), mRNA.	1	0.75492	12.3216	8.13829e-05
ILMN_1764457	LOC339766	PREDICTED: Homo sapiens hypothetical protein LOC339766 (LOC339766), mRNA.		1.31828	8.97018	8.65755e-05
ILMN_1741603	DBC1	Homo sapiens deleted in bladder cancer 1 (DBC1), mRNA.	9	0.800247	7.766	8.78819e-05
ILMN_1766650	FOXA1	Homo sapiens forkhead box A1 (FOXA1), mRNA.	14	0.928916	12.285	8.8477e-05
ILMN_1739310	SLC44A3	Homo sapiens solute carrier family 44, member 3 (SLC44A3), mRNA.	1	0.768696	10.5768	9.21309e-05
ILMN_1808415	SYT8	Homo sapiens synaptotagmin VIII (SYT8), mRNA.	11	1.53369	11.6774	9.87371e-05
ILMN_1799105	COL17A1	Homo sapiens collagen, type XVII, alpha 1 (COL17A1), mRNA.		1.1737	10.3461	9.93462e-05
ILMN_1687315	RXRA	Homo sapiens retinoid X receptor, alpha (RXRA), mRNA.	9	0.682645	13.1234	0.000101544
ILMN_1710622	DUOXA1	Homo sapiens dual oxidase maturation factor 1 (DUOXA1), mRNA.	15	0.866766	9.87188	0.000102565
ILMN_1776998	DNAJA4	Homo sapiens DnaJ (Hsp40) homolog, subfamily A, member 4 (DNAJA4), mRNA.	15	0.649662	12.141	0.000106868
ILMN_1808999	ARHGEF19	Homo sapiens Rho guanine nucleotide exchange factor (GEF) 19 (ARHGEF19), mRNA.	1	0.626406	10.5605	0.000108998
ILMN_1754592	EDARADD	Homo sapiens EDAR-associated death domain (EDARADD), transcript variant A, mRNA.	1	0.650648	10.0765	0.000110749
ILMN_1756931	GPR56	Homo sapiens G protein-coupled receptor 56 (GPR56), transcript variant 3, mRNA.	16	0.612297	11.5121	0.00011285
ILMN_1774229	SLC7A4	Homo sapiens solute carrier family 7 (cationic amino acid transporter, y+ system), member 4 (SLC7A4), mRNA.		0.750053	9.10467	0.000113643
ILMN_1656938	LOC729049	PREDICTED: Homo sapiens similar to T-box 1 isoform C (LOC729049), mRNA.	11	0.779721	9.80061	0.000117051
ILMN_1912083		603089645F1 NIH_MGC_120 Homo sapiens cDNA clone IMAGE:5228627 5, mRNA sequence		0.756477	10.9135	0.000121189
ILMN_1770498	LOC728411	PREDICTED: Homo sapiens similar to Beta-glucuronidase precursor (LOC728411), mRNA.	5	0.649933	9.33491	0.000126349
ILMN_1670625	LOC647595	PREDICTED: Homo sapiens similar to ankyrin repeat domain 20A (LOC647595), mRNA.		0.715882	8.4143	0.000128102
ILMN_1688154	MST1R	Homo sapiens macrophage stimulating 1 receptor (c-met-related tyrosine kinase) (MST1R), mRNA.	3	0.959469	9.57491	0.00012974
ILMN_1838767		Homo sapiens clone FP7915 unknown mRNA		1.19793	10.6467	0.000138688
ILMN_1779639	IRAK1BP1	Homo sapiens interleukin-1 receptor-associated kinase 1 binding protein 1 (IRAK1BP1), mRNA.	6	0.604114	8.83824	0.000144019
ILMN_1694589	PAQR8	Homo sapiens progestin and adipoQ receptor family member VIII (PAQR8), mRNA.	6	0.880799	10.4566	0.000144745
ILMN_1675788	ZNF175	Homo sapiens zinc finger protein 175 (ZNF175), mRNA.	19	0.700019	9.25279	0.000144764
ILMN_1797283	ASTN2	Homo sapiens astrotactin 2 (ASTN2), transcript variant 4, mRNA.	9	0.607615	8.65236	0.000146722
ILMN_1806034	GUSBL1	Homo sapiens glucuronidase, beta-like 1 (GUSBL1), mRNA.	6	0.625207	10.6392	0.000147585
ILMN_1840674		UI-E-EO1-ajb-c-22-0-UI.s1 UI-E-EO1 Homo sapiens cDNA clone UI-E-EO1-ajb-c-22-0-UI 3, mRNA sequence		0.724634	8.16412	0.000150446
ILMN_1741566	BMP7	Homo sapiens bone morphogenetic protein 7 (osteogenic protein 1) (BMP7), mRNA.	20	0.969264	9.60764	0.00015059
ILMN_1712719	MAP7	Homo sapiens microtubule-associated protein 7 (MAP7), mRNA.	6	0.627346	11.0715	0.000152954
ILMN_1674650	C9orf95	Homo sapiens chromosome 9 open reading frame 95 (C9orf95), mRNA.	9	0.681605	10.1315	0.000155371
ILMN_1706483	C1orf116	Homo sapiens chromosome 1 open reading frame 116 (C1orf116), mRNA.	1	0.811137	11.3876	0.000156781
ILMN_1720998	CA12	Homo sapiens carbonic anhydrase XII (CA12), transcript variant 2, mRNA.	15	0.967653	10.8187	0.00015762
ILMN_1739594	ACOT11	Homo sapiens acyl-CoA thioesterase 11 (ACOT11), transcript variant 2, mRNA.	1	0.66678	10.3714	0.000172888
ILMN_1798496	HOXB8	Homo sapiens homeobox B8 (HOXB8), mRNA.	17	1.40926	10.3204	0.000174451
ILMN_1794742	HES5	Homo sapiens hairy and enhancer of split 5 (Drosophila) (HES5), mRNA.	1	0.731666	8.77158	0.000178908
ILMN_1750086	ST3GAL4	Homo sapiens ST3 beta-galactoside alpha-2,3-sialyltransferase 4 (ST3GAL4), mRNA.	11	0.811118	11.5818	0.00018429
ILMN_1779034	NADSYN1	Homo sapiens NAD synthetase 1 (NADSYN1), mRNA.	11	0.709049	12.2489	0.000186684
ILMN_1713523	KLHDC6	Homo sapiens kelch domain containing 6 (KLHDC6), mRNA.	3	0.63407	7.51339	0.000187573
ILMN_1673704	INA	Homo sapiens internexin neuronal intermediate filament protein, alpha (INA), mRNA.	10	1.06697	10.1288	0.000191834
ILMN_1745849	ENTPD5	Homo sapiens ectonucleoside triphosphate diphosphohydrolase 5 (ENTPD5), mRNA.	14	0.64521	9.07261	0.000196754
ILMN_1810942	CYP3A5	Homo sapiens cytochrome P450, family 3, subfamily A, polypeptide 5 (CYP3A5), mRNA.	7	1.17985	11.2196	0.000206801
ILMN_1804633	C8orf42	Homo sapiens chromosome 8 open reading frame 42 (C8orf42), mRNA.		0.668627	8.57303	0.000210588
ILMN_1776519	RAP1GAP	Homo sapiens RAP1 GTPase activating protein (RAP1GAP), mRNA.	1	0.82798	11.7227	0.000213651
ILMN_1807914	ACSL5	Homo sapiens acyl-CoA synthetase long-chain family member 5 (ACSL5), transcript variant 3, mRNA.	10	0.76029	10.9841	0.000215907
ILMN_1678403	TMEM178	Homo sapiens transmembrane protein 178 (TMEM178), mRNA.	2	0.656697	8.34945	0.00021724
ILMN_1680110	C10orf116	Homo sapiens chromosome 10 open reading frame 116 (C10orf116), mRNA.	10	0.675008	14.9488	0.00022407
ILMN_1690621	GPR98	Homo sapiens G protein-coupled receptor 98 (GPR98), transcript variant 1, mRNA.		0.855448	9.86739	0.000227306
ILMN_1783690	LOC388743	PREDICTED: Homo sapiens similar to calpain 8, transcript variant 4 (LOC388743), mRNA.		0.920706	9.16297	0.000229026
ILMN_1790352	PIGZ	Homo sapiens phosphatidylinositol glycan anchor biosynthesis, class Z (PIGZ), mRNA.	3	0.74835	9.88715	0.000237755
ILMN_1761540	SEMA3F	Homo sapiens sema domain, immunoglobulin domain (Ig), short basic domain, secreted, (semaphorin) 3F (SEMA3F), mRNA.	3	0.754129	11.1767	0.000251322
ILMN_1676526	MPPED2	Homo sapiens metallophosphoesterase domain containing 2 (MPPED2), mRNA.	11	0.726304	9.35145	0.000252537
ILMN_1723123	FGFR3	Homo sapiens fibroblast growth factor receptor 3 (achondroplasia, thanatophoric dwarfism) (FGFR3), transcript variant 2, mRNA.	4	1.11624	12.795	0.000271206
ILMN_1914933		zv03b01.r1 Soares_NhHMPu_S1 Homo sapiens cDNA clone IMAGE:752521 5, mRNA sequence		0.616071	8.45055	0.000274523
ILMN_1863962		BX116033 NCI_CGAP_Lu24 Homo sapiens cDNA clone IMAGp998A155622, mRNA sequence		0.81467	9.12145	0.000286273
ILMN_1753613	HOXA5	Homo sapiens homeobox A5 (HOXA5), mRNA.	7	0.895545	11.6724	0.000288356
ILMN_1742830	LOC124220	Homo sapiens similar to common salivary protein 1 (LOC124220), mRNA.	16	0.870764	9.1597	0.000291327
ILMN_1714741	LOC346887	PREDICTED: Homo sapiens similar to solute carrier family 16 (monocarboxylic acid transporters), member 14 (LOC346887), mRNA.		0.692495	9.69309	0.0002915
ILMN_1669046	FOXQ1	Homo sapiens forkhead box Q1 (FOXQ1), mRNA.	6	0.883234	13.4405	0.000297141
ILMN_1730007	EVA1	Homo sapiens epithelial V-like antigen 1 (EVA1), transcript variant 2, mRNA.	11	0.622657	12.1998	0.000297254
ILMN_1727652	GATA3	Homo sapiens GATA binding protein 3 (GATA3), transcript variant 1, mRNA.	10	0.871978	11.0055	0.000297286
ILMN_1815203	HMGCS2	Homo sapiens 3-hydroxy-3-methylglutaryl-Coenzyme A synthase 2 (mitochondrial) (HMGCS2), mRNA.	1	1.37374	13.1225	0.000309547
ILMN_1725726	DHRS2	Homo sapiens dehydrogenase/reductase (SDR family) member 2 (DHRS2), transcript variant 2, mRNA.	14	1.1834	13.1092	0.000321129
ILMN_1712729	DKK4	Homo sapiens dickkopf homolog 4 (Xenopus laevis) (DKK4), mRNA.	8	0.71518	8.13709	0.000334767
ILMN_1659215	CYP4B1	Homo sapiens cytochrome P450, family 4, subfamily B, polypeptide 1 (CYP4B1), mRNA.	1	1.10641	10.8202	0.000365525
ILMN_1812618	CENTD3	Homo sapiens centaurin, delta 3 (CENTD3), mRNA.	5	0.659522	11.8341	0.000379333
ILMN_1686381	LAMB3	Homo sapiens laminin, beta 3 (LAMB3), transcript variant 2, mRNA.	1	0.741503	9.90739	0.000392029
ILMN_1733110	RASSF7	Homo sapiens Ras association (RalGDS/AF-6) domain family 7 (RASSF7), mRNA.	11	0.657379	12.1204	0.000393689
ILMN_1832425		Homo sapiens cDNA FLJ26692 fis, clone MPG07890		0.612231	9.7217	0.000427425
ILMN_1725193	IGFBP2	Homo sapiens insulin-like growth factor binding protein 2, 36kDa (IGFBP2), mRNA.	2	0.938948	10.391	0.000431256
ILMN_1794829	C6orf117	Homo sapiens chromosome 6 open reading frame 117 (C6orf117), mRNA.	6	0.620604	8.17418	0.000440933
ILMN_1684341	HAS3	Homo sapiens hyaluronan synthase 3 (HAS3), transcript variant 2, mRNA.	16	0.91109	11.0955	0.000474488
ILMN_1791826	RAB25	Homo sapiens RAB25, member RAS oncogene family (RAB25), mRNA.		0.701347	12.4639	0.000491802
ILMN_1732066	CKMT1A	Homo sapiens creatine kinase, mitochondrial 1A (CKMT1A), nuclear gene encoding mitochondrial protein, mRNA.	15	0.710489	10.3445	0.000512841
ILMN_1801216	S100P	Homo sapiens S100 calcium binding protein P (S100P), mRNA.	4	0.847308	14.5472	0.000536659
ILMN_1813949	CASQ1	Homo sapiens calsequestrin 1 (fast-twitch, skeletal muscle) (CASQ1), nuclear gene encoding mitochondrial protein, mRNA.	1	0.720806	8.98915	0.000593732
ILMN_1810915	FAAH	Homo sapiens fatty acid amide hydrolase (FAAH), mRNA.	1	0.620113	10.4719	0.000606674
ILMN_1735502	MGC33846	Homo sapiens hypothetical protein MGC33846 (MGC33846), mRNA.	11	0.724643	9.14703	0.000613245
ILMN_1698766	PYCARD	Homo sapiens PYD and CARD domain containing (PYCARD), transcript variant 1, mRNA.	16	0.616251	11.4263	0.000613754
ILMN_1773006	FABP4	Homo sapiens fatty acid binding protein 4, adipocyte (FABP4), mRNA.	8	1.52185	11.0205	0.000613754
ILMN_1766770	MGC39715	Homo sapiens hypothetical protein MGC39715 (MGC39715), mRNA.	8	1.04423	11.2083	0.000616223
ILMN_1763491	CKMT1B	Homo sapiens creatine kinase, mitochondrial 1B (CKMT1B), nuclear gene encoding mitochondrial protein, mRNA.	15	0.643351	9.55709	0.000622896
ILMN_1719883	CYP4F11	Homo sapiens cytochrome P450, family 4, subfamily F, polypeptide 11 (CYP4F11), mRNA.	19	0.844768	9.73073	0.000702309
ILMN_1753584	KRT8	Homo sapiens keratin 8 (KRT8), mRNA.	12	0.695947	13.2722	0.000715684
ILMN_1786429	P2RY5	Homo sapiens purinergic receptor P2Y, G-protein coupled, 5 (P2RY5), mRNA.		0.603057	9.51097	0.000734541
ILMN_1754629	TRAK1	Homo sapiens trafficking protein, kinesin binding 1 (TRAK1), transcript variant 2, mRNA.		0.616769	11.6368	0.000748031
ILMN_1786149	LOC284837	Homo sapiens hypothetical protein LOC284837 (LOC284837), mRNA.	21	0.660911	9.54418	0.000766098
ILMN_1656285	METTL7A	Homo sapiens methyltransferase like 7A (METTL7A), mRNA.	12	0.836416	10.6445	0.00077363
ILMN_1805064	SCARNA9	Homo sapiens small Cajal body-specific RNA 9 (SCARNA9) on chromosome 11.	11	0.700487	9.35776	0.000785077
ILMN_1685397	ITGA3	Homo sapiens integrin, alpha 3 (antigen CD49C, alpha 3 subunit of VLA-3 receptor) (ITGA3), transcript variant b, mRNA.	17	0.684286	11.1215	0.000791051
ILMN_1687556	LOC92196	Homo sapiens death-associated protein-like 1 (LOC92196), mRNA.	2	0.966589	8.40952	0.000799403
ILMN_1665792	ITGA2	Homo sapiens integrin, alpha 2 (CD49B, alpha 2 subunit of VLA-2 receptor) (ITGA2), mRNA.		0.804331	10.3505	0.000832898
ILMN_1785413	ATP2C2	Homo sapiens ATPase, Ca++ transporting, type 2C, member 2 (ATP2C2), mRNA.		0.650863	8.72291	0.000877948
ILMN_1795342	MLPH	Homo sapiens melanophilin (MLPH), transcript variant 1, mRNA.		0.8998	11.3898	0.000885434
ILMN_1658426	WNT10A	Homo sapiens wingless-type MMTV integration site family, member 10A (WNT10A), mRNA.	2	0.805824	9.30255	0.000899649
ILMN_1809384	CYP4F12	Homo sapiens cytochrome P450, family 4, subfamily F, polypeptide 12 (CYP4F12), mRNA.	19	0.917626	11.4393	0.000934049
ILMN_1796150	HS3ST1	Homo sapiens heparan sulfate (glucosamine) 3-O-sulfotransferase 1 (HS3ST1), mRNA.	4	0.670534	9.40358	0.000945013
ILMN_1713529	SEMA6A	Homo sapiens sema domain, transmembrane domain (TM), and cytoplasmic domain, (semaphorin) 6A (SEMA6A), mRNA.	5	0.857482	11.8772	0.00099455
ILMN_1796925	CXADR	Homo sapiens coxsackie virus and adenovirus receptor (CXADR), mRNA.	21	0.715371	12.5062	0.00101125
ILMN_1704668	LOC402677	PREDICTED: Homo sapiens similar to 40S ribosomal protein S3a (V-fos transformation effector protein), transcript variant 3 (LOC402677), mRNA.		0.646937	9.44739	0.00101227
ILMN_1730977	SLC44A4	Homo sapiens solute carrier family 44, member 4 (SLC44A4), transcript variant 1, mRNA.	6	0.863202	10.1684	0.00101406
ILMN_1877909		BX105647 Soares_NFL_T_GBC_S1 Homo sapiens cDNA clone IMAGp998F143713, mRNA sequence		0.604123	9.20115	0.00103515
ILMN_1696302	LOC387934	PREDICTED: Homo sapiens similar to Fatty acid-binding protein, epidermal (E-FABP) (Psoriasis-associated fatty acid-binding protein homolog) (PA-FABP) (LOC387934), mRNA.		1.01003	10.5912	0.00105736
ILMN_1849155		Homo sapiens cDNA: FLJ21245 fis, clone COL01184		0.928293	12.6021	0.0010931
ILMN_1804419	LRMP	Homo sapiens lymphoid-restricted membrane protein (LRMP), mRNA.	12	0.644558	10.3009	0.00116514
ILMN_1681489	LOC388344	PREDICTED: Homo sapiens similar to ribosomal protein L13, transcript variant 5 (LOC388344), mRNA.		0.724951	11.5625	0.00118167
ILMN_1657679	VAV3	Homo sapiens vav 3 oncogene (VAV3), transcript variant 2, mRNA.		0.663824	10.166	0.00119451
ILMN_1703041	IDUA	Homo sapiens iduronidase, alpha-L- (IDUA), mRNA.		0.613523	10.5017	0.00125944
ILMN_1784217	SOX15	Homo sapiens SRY (sex determining region Y)-box 15 (SOX15), mRNA.	17	0.966447	9.91539	0.0012733
ILMN_1737089	CAPN5	Homo sapiens calpain 5 (CAPN5), mRNA.	11	0.719657	11.6533	0.00135112
ILMN_1893697		nj54b12.s1 NCI_CGAP_Pr9 Homo sapiens cDNA clone IMAGE:996287, mRNA sequence		0.77228	10.4266	0.00137975
ILMN_1836309		PREDICTED: Homo sapiens LOC440151 (LOC440151), mRNA		0.615379	9.39624	0.00140619
ILMN_1700024	UST	Homo sapiens uronyl-2-sulfotransferase (UST), mRNA.	6	0.610022	9.23758	0.00144269
ILMN_1677108	CAPN13	Homo sapiens calpain 13 (CAPN13), mRNA.	2	0.771962	9.36818	0.00144269
ILMN_1724799	PLA2G2F	Homo sapiens phospholipase A2, group IIF (PLA2G2F), mRNA.	1	0.740766	9.32903	0.0014594
ILMN_1753345	SCAMP5	Homo sapiens secretory carrier membrane protein 5 (SCAMP5), mRNA.	15	0.688699	9.48782	0.00161264
ILMN_1687612	PPARG	Homo sapiens peroxisome proliferator-activated receptor gamma (PPARG), transcript variant 2, mRNA.		0.64417	11.3907	0.00163414
ILMN_1745623	EFCAB4A	Homo sapiens EF-hand calcium binding domain 4A (EFCAB4A), mRNA.	11	0.715985	10.7063	0.00173315
ILMN_1726368	ZNF135	Homo sapiens zinc finger protein 135 (ZNF135), mRNA.	19	0.607374	8.7377	0.00173591
ILMN_1654563	EFNB1	Homo sapiens ephrin-B1 (EFNB1), mRNA.	X	0.600858	10.0502	0.00177015
ILMN_1691743	GJC1	Homo sapiens gap junction protein, chi 1, 31.9kDa (GJC1), mRNA.	17	0.647541	8.37455	0.00188555
ILMN_1712959	DUSP2	Homo sapiens dual specificity phosphatase 2 (DUSP2), mRNA.	2	0.714713	9.81261	0.00192441
ILMN_1744604	CYBA	Homo sapiens cytochrome b-245, alpha polypeptide (CYBA), mRNA.	16	0.618423	12.5688	0.00193245
ILMN_1779852	LOC387934	PREDICTED: Homo sapiens similar to Fatty acid-binding protein, epidermal (E-FABP) (Psoriasis-associated fatty acid-binding protein homolog) (PA-FABP) (LOC387934), mRNA.		0.849995	10.8792	0.00197214
ILMN_1687508	ALDH7A1	Homo sapiens aldehyde dehydrogenase 7 family, member A1 (ALDH7A1), mRNA.	5	0.801594	10.923	0.00202991
ILMN_1678899	ERN2	Homo sapiens endoplasmic reticulum to nucleus signalling 2 (ERN2), mRNA.	16	0.842247	9.06012	0.00235309
ILMN_1735156	SLC4A11	Homo sapiens solute carrier family 4, sodium bicarbonate transporter-like, member 11 (SLC4A11), mRNA.		0.654887	10.239	0.00242512
ILMN_1693119	LOC130576	Homo sapiens hypothetical protein LOC130576 (LOC130576), mRNA.	2	0.690343	11.1269	0.00244902
ILMN_1697460	REEP6	Homo sapiens receptor accessory protein 6 (REEP6), mRNA.	19	0.660276	10.4173	0.00255096
ILMN_1752813	UGT1A6	Homo sapiens UDP glucuronosyltransferase 1 family, polypeptide A6 (UGT1A6), transcript variant 2, mRNA.	2	0.625913	8.81782	0.00276888
ILMN_1814270	LY6D	Homo sapiens lymphocyte antigen 6 complex, locus D (LY6D), mRNA.	8	1.21854	10.0307	0.00285353
ILMN_1777170	LOC440585	PREDICTED: Homo sapiens hypothetical LOC440585, transcript variant 3 (LOC440585), mRNA.		0.774261	10.4899	0.00287705
ILMN_1836751		ig67g12.y1 HR85 islet Homo sapiens cDNA 5, mRNA sequence		0.614598	8.2943	0.00292242
ILMN_1771538	PSCA	Homo sapiens prostate stem cell antigen (PSCA), mRNA.	8	1.08299	12.0693	0.00315792
ILMN_1755897	UGT2B7	Homo sapiens UDP glucuronosyltransferase 2 family, polypeptide B7 (UGT2B7), mRNA.	4	0.689601	9.60709	0.00342975
ILMN_1676213	SRPX2	Homo sapiens sushi-repeat-containing protein, X-linked 2 (SRPX2), mRNA.		0.761824	10.9593	0.00367531
ILMN_1732988	KIAA1666	PREDICTED: Homo sapiens KIAA1666 protein (KIAA1666), mRNA.		0.624911	9.77752	0.00410541
ILMN_1707690	LOC648517	PREDICTED: Homo sapiens similar to Aldo-keto reductase family 1 member C1 (20-alpha-hydroxysteroid dehydrogenase) (20-alpha-HSD) (Trans-1,2-dihydrobenzene-1,2-diol dehydrogenase) (High-affinity hepatic bile acid-binding protein) (HBAB) (Chlordecone reductase homolog HAKRC..., transcript variant 2 (LOC648517), mRNA.		0.745758	10.6747	0.00480464
ILMN_1770612	KRT15	Homo sapiens keratin 15 (KRT15), mRNA.	17	0.916614	10.0961	0.00487848
ILMN_1679176	CLCA4	Homo sapiens chloride channel, calcium activated, family member 4 (CLCA4), mRNA.	1	1.08395	10.3265	0.00537778
ILMN_1895853		UI-CF-DU1-adl-c-02-0-UI.s1 UI-CF-DU1 Homo sapiens cDNA clone UI-CF-DU1-adl-c-02-0-UI 3, mRNA sequence		0.636467	7.9457	0.00572175
ILMN_1808391	DUSP4	Homo sapiens dual specificity phosphatase 4 (DUSP4), transcript variant 1, mRNA.	8	0.672961	10.4851	0.00613243
ILMN_1676609	ACSBG1	Homo sapiens acyl-CoA synthetase bubblegum family member 1 (ACSBG1), mRNA.	15	0.804933	8.65667	0.00627005
ILMN_1751400	SKAP1	Homo sapiens src kinase associated phosphoprotein 1 (SKAP1), transcript variant 1, mRNA.		0.626887	10.2194	0.00665406
ILMN_1716740	RPL27A	Homo sapiens ribosomal protein L27a (RPL27A), mRNA.	11	0.760293	12.4451	0.0071271
ILMN_1792256	TBX2	Homo sapiens T-box 2 (TBX2), mRNA.	17	0.711297	12.3747	0.0075415
ILMN_1742534	COL4A5	Homo sapiens collagen, type IV, alpha 5 (Alport syndrome) (COL4A5), transcript variant 1, mRNA.	X	0.662424	11.7825	0.00779067
ILMN_1729659	TNNI2	Homo sapiens troponin I type 2 (skeletal, fast) (TNNI2), mRNA.	11	0.991577	9.92624	0.00780563
ILMN_1725750	LOC644695	PREDICTED: Homo sapiens hypothetical LOC644695 (LOC644695), mRNA.	17	0.722744	8.78891	0.00793092
ILMN_1771120	TMEM45B	Homo sapiens transmembrane protein 45B (TMEM45B), mRNA.	11	0.757675	10.7644	0.00803695
ILMN_1685663	CYP24A1	Homo sapiens cytochrome P450, family 24, subfamily A, polypeptide 1 (CYP24A1), nuclear gene encoding mitochondrial protein, mRNA.	20	0.765122	9.18036	0.00960815
ILMN_1736670	PPP1R3C	Homo sapiens protein phosphatase 1, regulatory (inhibitor) subunit 3C (PPP1R3C), mRNA.	10	0.711433	11.1768	0.00997824

## Sheet: StranskyNatGen Invasive Up
ID	Symbol	Gene Title	Chromosome	logFC	AveExpr	adj.P.Val
1451_s_at	POSTN	periostin, osteoblast specific factor	13q13.3	-3.58183368604388	5.53977237945212	3.96387849641973e-06
311_s_at	FN1	fibronectin 1	2q34	-3.45682521061702	7.83132555443053	1.49761257265850e-05
37032_at	NNMT	nicotinamide N-methyltransferase	11q23.1	-3.392084478241	6.43885041132681	1.79230158396131e-06
37864_s_at				-3.37417626926342	9.7239699931658	0.000604926912670278
36979_at	SLC2A3	solute carrier family 2 (facilitated glucose transporter), member 3	12p13.3	-3.14731246732007	5.16009949227895	7.79321092098982e-07
31720_s_at	FN1	fibronectin 1	2q34	-3.09615485188421	9.29940735015731	1.67444369019157e-05
38772_at	CYR61	cysteine-rich, angiogenic inducer, 61	1p22.3	-3.00776092614685	5.79570629774626	1.39026717282588e-05
32305_at	COL1A2	collagen, type I, alpha 2	7q22.1	-2.98320992758727	6.23096968061008	7.1165051389086e-06
35832_at	SULF1	sulfatase 1	8q13.1	-2.96251528960836	4.58863216238444	1.18494936080303e-05
38194_s_at				-2.96140772400060	9.5986166314804	0.00243736075694286
875_g_at	CCL2	chemokine (C-C motif) ligand 2	17q11.2-q12	-2.94118481240519	5.12378165815562	9.83572371787296e-06
31719_at	FN1	fibronectin 1	2q34	-2.93231793731818	9.08573148317946	1.93533862147614e-05
39331_at	TUBB2A	tubulin, beta 2A	6p25	-2.92462814303153	7.13323460650508	3.87058686330685e-07
1197_at	ACTG2	actin, gamma 2, smooth muscle, enteric	2p13.1	-2.92330460172457	7.65338429635489	0.00204739785026757
296_at	TUBB2A	tubulin, beta 2A	6p25	-2.76148652014341	7.96977431218936	6.22918224074285e-07
38299_at	IL6	interleukin 6 (interferon, beta 2)	7p21	-2.74536200234107	3.92575214537319	0.000111294145625439
37279_at	GEM	GTP binding protein overexpressed in skeletal muscle	8q13-q21	-2.74035812302252	4.63216747740806	8.71608533356573e-06
38420_at	COL5A2	collagen, type V, alpha 2	2q14-q32	-2.7218797595778	7.32665866927143	1.47308660101471e-05
33274_f_at				-2.71193472637187	10.2144300045	0.00328010540580772
39945_at	FAP	fibroblast activation protein, alpha	2q23	-2.70974463598685	3.84119619525480	0.000120350142722828
36658_at	DHCR24	24-dehydrocholesterol reductase	1p32.3	-2.65593921591526	6.61418499678352	3.96387849641973e-06
37892_at	COL11A1	collagen, type XI, alpha 1	1p21	-2.65593220111167	3.75388682692032	0.000388129548230361
41839_at	GAS1	growth arrest-specific 1	9q21.3-q22	-2.62953537595769	4.10065303307190	2.95549580548528e-05
34802_at	COL6A2	collagen, type VI, alpha 2	21q22.3	-2.61042461271915	7.20796350822014	0.000155869627254366
661_at	GAS1	growth arrest-specific 1	9q21.3-q22	-2.59492511124569	3.89442272133684	3.10996256847244e-05
649_s_at	CXCR4	chemokine (C-X-C motif) receptor 4	2q21	-2.56847914717364	5.91349645271253	6.22918224074285e-07
32306_g_at	COL1A2	collagen, type I, alpha 2	7q22.1	-2.56543223413589	9.20005240078547	6.12801427015506e-06
33412_at	LGALS1	lectin, galactoside-binding, soluble, 1	22q13.1	-2.53690229282679	9.02597303310769	2.62459792383800e-05
32488_at	COL3A1	collagen, type III, alpha 1	2q31	-2.53436670498625	10.0217021515822	5.44692940672765e-06
33273_f_at	IGL@	immunoglobulin lambda locus	22q11.2	-2.53371971183857	10.1783400575266	0.00421148143609745
1369_s_at	IL8	interleukin 8	4q13-q21	-2.53249323127707	4.90377923581112	0.000247260172504125
38637_at	LOX	lysyl oxidase	5q23.2	-2.51037775529895	3.93105007339818	7.71282051390063e-05
595_at	TNFAIP3	tumor necrosis factor, alpha-induced protein 3	6q23	-2.49806250080598	5.95929945414667	9.6208914697542e-06
36638_at	CTGF	connective tissue growth factor	6q23.1	-2.47638506996601	7.84599486901775	2.95549580548528e-05
33501_r_at				-2.46630255097837	8.60807436808467	0.00480658735019527
297_g_at	TUBB2A	tubulin, beta 2A	6p25	-2.46323380222135	6.85563861672826	3.87058686330685e-07
35168_f_at	COL16A1	collagen, type XVI, alpha 1	1p35-p34	-2.45761425939511	6.3554277316972	0.000488838793525293
38111_at	VCAN	versican	5q14.3	-2.44153342982414	7.34992244755497	0.00057575332593659
39109_at	TPX2	TPX2, microtubule-associated, homolog (Xenopus laevis)	20q11.2	-2.43672149373067	5.66364459698233	1.37335565792260e-05
32818_at	TNC	tenascin C	9q33	-2.42283995925575	5.17461876104505	0.000237279788963776
1385_at	TGFBI	transforming growth factor, beta-induced, 68kDa	5q31	-2.40443637030607	7.91103564871035	2.90238128922276e-05
38125_at	SERPINE1	serpin peptidase inhibitor, clade E (nexin, plasminogen activator inhibitor type 1), member 1	7q21.3-q22	-2.39783939721239	7.03202264320465	0.00163822970366329
41164_at	IGHM	immunoglobulin heavy constant mu	14q32.33	-2.38795157824643	4.60495597101292	8.58100795765036e-05
39069_at	AEBP1	AE binding protein 1	7p13	-2.38771227321995	7.53213796438088	4.16849172183158e-06
41246_at	SERPINE2	serpin peptidase inhibitor, clade E (nexin, plasminogen activator inhibitor type 1), member 2	2q33-q35	-2.37475937706418	4.90015577466855	2.29038662483489e-05
38112_g_at	VCAN	versican	5q14.3	-2.35072599522955	6.79621967131304	0.000313775996589426
33499_s_at				-2.34069951702894	9.57811017692451	0.00640522160963536
34820_at	PTN	pleiotrophin	7q33	-2.33877604768392	5.59838795680127	0.00108301516824041
35474_s_at	COL1A1	collagen, type I, alpha 1	17q21.33	-2.32668940724761	8.627698691134	2.29038662483489e-05
408_at	CXCL1	chemokine (C-X-C motif) ligand 1 (melanoma growth stimulating activity, alpha)	4q21	-2.31339451005092	4.74589697264132	0.000530364625639358
32640_at	ICAM1	intercellular adhesion molecule 1	19p13.3-p13.2	-2.30819833884660	4.65352122737803	0.000213204179935969
34375_at	CCL2	chemokine (C-C motif) ligand 2	17q11.2-q12	-2.30780696443347	5.52662277440149	1.12860751891792e-05
38466_at	CTSK	cathepsin K	1q21	-2.30747995164068	5.19969452321197	2.95549580548528e-05
36976_at	CDH11	cadherin 11, type 2, OB-cadherin (osteoblast)	16q22.1	-2.30615128784490	4.69481016102264	0.000155571772820288
41096_at	S100A8	S100 calcium binding protein A8	1q21	-2.28808857474376	7.5271753595956	0.00494620900761691
38181_at	MMP11	matrix metallopeptidase 11 (stromelysin 3)	22q11.2	-2.27384449575663	4.18846837462917	0.000346781170732447
40496_at	C1S	complement component 1, s subcomponent	12p13	-2.26453041815984	7.78603743289912	0.000313448899391598
39119_s_at				-2.26442727129070	6.29132025742238	1.58392083183818e-05
35566_f_at				-2.26235280881692	5.42422588827242	0.00214925267171072
32307_s_at	COL1A2	collagen, type I, alpha 2	7q22.1	-2.25834345924319	9.72345530119192	2.21714250392227e-05
39710_at	C5orf13	chromosome 5 open reading frame 13	5q22.1	-2.24491880591431	6.37647517041461	3.99321971116368e-05
32905_s_at				-2.21056863838752	5.55439031988589	0.000774409445701033
39728_at	IFI30	interferon, gamma-inducible protein 30	19p13.1	-2.19465283518718	7.93194551858033	1.13500824502838e-05
38126_at	BGN	biglycan	Xq28	-2.19431854702575	8.9042431902713	1.58126858076484e-05
39182_at	EMP3	epithelial membrane protein 3	19q13.3	-2.18789174094992	5.28078228799846	0.000117248220877403
38077_at	COL6A3	collagen, type VI, alpha 3	2q37	-2.18702719416819	9.09077341063952	1.39272596059663e-05
32855_at	LDLR	low density lipoprotein receptor	19p13.3	-2.18620687814105	6.13288160906022	3.56884523513429e-05
1042_at	RARRES1	retinoic acid receptor responder (tazarotene induced) 1	3q25.32	-2.17316181405407	4.69816378105463	0.00344536681965262
38427_at	COL15A1	collagen, type XV, alpha 1	9q21-q22	-2.16319612361751	5.46500100163298	2.213823994644e-05
31859_at	MMP9	matrix metallopeptidase 9 (gelatinase B, 92kDa gelatinase, 92kDa type IV collagenase)	20q11.2-q13.1	-2.15601769002780	5.00731606028234	0.000281333905284446
41739_s_at	CALD1	caldesmon 1	7q33	-2.13973132889435	6.20117275947334	2.08690859459327e-05
37565_at	MMD	monocyte to macrophage differentiation-associated	17q	-2.13816714163473	5.19465335830413	2.42829522003690e-06
32535_at	FBN1	fibrillin 1	15q21.1	-2.13302873170898	5.04651726317007	6.36143074944679e-05
35692_at	TMEM158	transmembrane protein 158 (gene/pseudogene)	3p21.3	-2.1316595297096	3.98859069041603	0.000492983663905634
753_at	NID2	nidogen 2 (osteonidogen)	14q22.1	-2.12250117186124	3.93374390743446	2.29038662483489e-05
36931_at	TAGLN	transgelin	11q23.2	-2.11758017897458	8.1840970509778	0.00102037047805566
38404_at	TGM2	transglutaminase 2 (C polypeptide, protein-glutamine-gamma-glutamyltransferase)	20q12	-2.10263417668416	7.23701766851034	7.94784765923903e-05
39120_at	MT1X	metallothionein 1X	16q13	-2.09448234307597	3.93412821670043	0.000939136542698838
31897_at	FILIP1L	filamin A interacting protein 1-like	3q12.1	-2.08967135489365	5.08717340384663	4.16849172183158e-06
1347_at	CDC25B	cell division cycle 25 homolog B (S. pombe)	20p13	-2.08007640333171	5.42220627027716	1.26368942864675e-05
33337_at	DEGS1	degenerative spermatocyte homolog 1, lipid desaturase (Drosophila)	1q42.11	-2.07890708389115	6.54130061958148	8.71608533356573e-06
37200_at				-2.06920900779551	5.55769726754914	0.000450637580820108
33505_at	RARRES1	retinoic acid receptor responder (tazarotene induced) 1	3q25.32	-2.06286583130679	4.88355549484451	0.00458441811976588
33891_at	CLIC4	chloride intracellular channel 4	1p36.11	-2.05292759823392	8.33696181292532	2.29038662483489e-05
39372_at	FADS1	fatty acid desaturase 1	11q12.2-q13.1	-2.04237377604067	5.20755875517873	1.37335565792260e-05
37187_at	CXCL2	chemokine (C-X-C motif) ligand 2	4q21	-2.03720849562054	3.43711307062346	0.000301942210444773
38038_at	LUM	lumican	12q21.3-q22	-2.03061128689795	8.27514193869605	0.000144958871688436
1237_at	IER3	immediate early response 3	6p21.3	-2.02883450295388	7.21478547001893	0.00015661467494998
36543_at	F3	coagulation factor III (thromboplastin, tissue factor)	1p22-p21	-2.02440482740633	5.02348806713116	0.000367142176986245
38722_at	COL6A1	collagen, type VI, alpha 1	21q22.3	-2.02253179457532	8.08046687033109	0.000275674842567984
2087_s_at	CDH11	cadherin 11, type 2, OB-cadherin (osteoblast)	16q22.1	-2.01797784366364	3.9569042371608	0.000113224027107385
34105_f_at				-2.01256663416494	7.30137589941724	0.00248534122290251
41531_at	TM4SF1	transmembrane 4 L six family member 1	3q21-q25	-2.0081340088127	6.20073298815312	0.00133154570013044
40008_at	CCL11	chemokine (C-C motif) ligand 11	17q21.1-q21.2	-2.00593199723624	3.44983190167174	0.000126358504943548
1005_at	DUSP1	dual specificity phosphatase 1	5q34	-2.00270584127270	6.23059460422396	0.00276832752913482
35926_s_at				-1.98998057927756	7.8522436654033	0.00416031258808970
36993_at	PDGFRB	platelet-derived growth factor receptor, beta polypeptide	5q33.1	-1.98180369242674	6.50027510223799	6.09733315634138e-07
37310_at	PLAU	plasminogen activator, urokinase	10q24	-1.97830350279469	6.94959787474668	0.00328298150979984
35372_r_at	IL8	interleukin 8	4q13-q21	-1.97580620944489	4.5076941775567	0.00115533009753554
41870_at	PDPN	podoplanin	1p36.21	-1.96730186166841	5.69282950468856	8.40897642535889e-05
36781_at	SERPINA1	serpin peptidase inhibitor, clade A (alpha-1 antiproteinase, antitrypsin), member 1	14q32.1	-1.96378217938891	4.41413142874097	0.000888622077576051
38796_at	C1QB	complement component 1, q subcomponent, B chain	1p36.12	-1.95850751880444	6.98947624115099	4.85613097278362e-05
37403_at	ANXA1	annexin A1	9q12-q21.2	-1.95790359615520	8.4232654614246	0.000193611372397138
189_s_at	PLAUR	plasminogen activator, urokinase receptor	19q13	-1.95534084911505	6.48298934931941	1.58126858076484e-05
36149_at	DPYSL3	dihydropyrimidinase-like 3	5q32	-1.95412803790699	6.21748248914272	0.00172242386391427
38363_at	TYROBP	TYRO protein tyrosine kinase binding protein	19q13.1	-1.94635783489271	6.32106283379547	2.95549580548528e-05
40074_at	MTHFD2	methylenetetrahydrofolate dehydrogenase (NADP+ dependent) 2, methenyltetrahydrofolate cyclohydrolase	2p13.1	-1.94016811567808	6.66976169133873	0.000142149230741672
36227_at	IL7R	interleukin 7 receptor	5p13	-1.93915536035959	4.45291237995148	4.92679905641349e-05
37701_at	RGS2	regulator of G-protein signaling 2, 24kDa	1q31	-1.92903002217426	5.68547370556335	0.000630187497697701
1592_at	TOP2A	topoisomerase (DNA) II alpha 170kDa	17q21-q22	-1.91918459842315	6.7043053331394	0.000121204608346316
36661_s_at	CD14	CD14 molecule	5q22-q32	-1.88820450095235	6.02594420544039	2.65995718975106e-05
658_at	THBS2	thrombospondin 2	6q27	-1.88816731448892	6.14352668928474	0.004764438149114
40480_s_at	FYN	FYN oncogene related to SRC, FGR, YES	6q21	-1.87432314803033	4.70596857555272	8.71608533356573e-06
925_at	IFI30	interferon, gamma-inducible protein 30	19p13.1	-1.86649949480666	7.876822862494	2.95549580548528e-05
38634_at	RBP1	retinol binding protein 1, cellular	3q23	-1.85115191942212	5.23634752630733	0.00052100206845606
1651_at	UBE2C	ubiquitin-conjugating enzyme E2C	20q13.12	-1.84788400885278	7.91756198828953	0.000201618040590480
35699_at	BUB1B	budding uninhibited by benzimidazoles 1 homolog beta (yeast)	15q15	-1.84774928516426	5.14875422008141	5.60316335381571e-05
41354_at	STC1	stanniocalcin 1	8p21-p11.2	-1.84510217207340	4.40284353758059	0.00234338422037603
31682_s_at	VCAN	versican	5q14.3	-1.84121955066978	5.80175417499926	0.00117917062480437
1771_s_at	PDGFRB	platelet-derived growth factor receptor, beta polypeptide	5q33.1	-1.82184860051157	6.56580360649951	1.69009670635066e-06
36130_f_at	MT1E	metallothionein 1E	16q13	-1.82146121803926	6.32147399661324	0.000511529584179777
40607_at	DPYSL2	dihydropyrimidinase-like 2	8p22-p21	-1.81818816884099	6.92511003655087	6.93017704316318e-05
38326_at	G0S2	G0/G1switch 2	1q32.2	-1.81675029027998	5.90219349022683	0.000830518471622362
1767_s_at	TGFB3	transforming growth factor, beta 3	14q24	-1.81300840953361	4.11176500185426	1.91408708107694e-05
41738_at	CALD1	caldesmon 1	7q33	-1.81208725948623	7.02413255689121	0.00066577629309585
35985_at				-1.81164223676117	4.53332760607092	7.7837970003449e-05
37558_at	IGF2BP3	insulin-like growth factor 2 mRNA binding protein 3	7p11	-1.80348477041845	3.41946803233784	0.00119435731217734
36197_at	CHI3L1	chitinase 3-like 1 (cartilage glycoprotein-39)	1q32.1	-1.80273656936318	5.30622334594741	0.0029803922503967
36575_at	RGS1	regulator of G-protein signaling 1	1q31	-1.80272735068218	4.56554351503865	7.27931544102485e-05
37688_f_at	FCGR2A	Fc fragment of IgG, low affinity IIa, receptor (CD32)	1q23	-1.80104313764573	5.08422485854176	6.93017704316318e-05
33266_at	AURKB	aurora kinase B	17p13.1	-1.80082073184547	5.21329609013375	0.000299020893559143
38653_at	PMP22	peripheral myelin protein 22	17p12	-1.79590841125317	7.16122115436787	0.000159555545095295
39690_at	PDLIM3	PDZ and LIM domain 3	4q35	-1.79148554426404	3.6352925016145	0.00131034887990093
40567_at				-1.79005492393248	8.28489222552317	0.00145962265500923
36889_at	FCER1G	Fc fragment of IgE, high affinity I, receptor for; gamma polypeptide	1q23	-1.78313962800621	4.75227071507865	0.000126730573457067
41871_at	PDPN	podoplanin	1p36.21	-1.78211537139800	5.06097301233869	0.000341167372806291
38095_i_at	HLA-DPB1	major histocompatibility complex, class II, DP beta 1	6p21.3	-1.77668110240322	8.57429996722823	0.000120740512343969
37023_at	LCP1	lymphocyte cytosolic protein 1 (L-plastin)	13q14.3	-1.77604131857987	7.50653146855991	0.000385551046077272
892_at	TM4SF1	transmembrane 4 L six family member 1	3q21-q25	-1.77201282946078	5.97891200302122	0.00161116926308067
39081_at	MT2A	metallothionein 2A	16q13	-1.77128867471511	5.64688423621686	0.000219938175482837
41719_i_at	FADS1	fatty acid desaturase 1	11q12.2-q13.1	-1.76957573139795	5.11071625087758	2.52073697018518e-05
32263_at	CCNB2	cyclin B2	15q22.2	-1.75056131841933	5.47772245123025	0.000149202523916192
39395_at	THY1	Thy-1 cell surface antigen	11q23.3	-1.75034459316871	6.46150013358617	7.1165051389086e-06
38797_at	SLC39A14	solute carrier family 39 (zinc transporter), member 14	8p21.3	-1.74376542722811	6.4644744798158	0.00013998661865211
659_g_at	THBS2	thrombospondin 2	6q27	-1.74361262900103	6.76090865693772	0.00170524530757586
32313_at	TPM2	tropomyosin 2 (beta)	9p13	-1.74341434129309	7.92090573183933	0.000815337122177923
40041_at	NDC80	NDC80 homolog, kinetochore complex component (S. cerevisiae)	18p11.32	-1.73775558499077	4.96938728014334	0.000192498135334182
39753_at	ITGA5	integrin, alpha 5 (fibronectin receptor, alpha polypeptide)	12q11-q13	-1.73684997256682	5.8055690659427	0.000347343234048147
671_at	SPARC	secreted protein, acidic, cysteine-rich (osteonectin)	5q31.3-q32	-1.72862976522478	10.0523571702778	5.24823694106267e-06
41827_f_at	LOC91316	glucuronidase, beta/immunoglobulin lambda-like polypeptide 1 pseudogene	22q11.23	-1.72852265282209	8.69175259768405	0.00492379183800597
34320_at	PTRF	polymerase I and transcript release factor	17q21.2	-1.72127547367740	7.81919164169656	3.78168665623102e-05
672_at	SERPINE1	serpin peptidase inhibitor, clade E (nexin, plasminogen activator inhibitor type 1), member 1	7q21.3-q22	-1.71602094289024	5.5355002016951	0.00459924342935575
2039_s_at	FYN	FYN oncogene related to SRC, FGR, YES	6q21	-1.71368413605099	5.4035586007469	1.39026717282588e-05
41700_at	F2R	coagulation factor II (thrombin) receptor	5q13	-1.71219681178766	4.53798977833489	0.000192496251975939
32128_at	CCL18	chemokine (C-C motif) ligand 18 (pulmonary and activation-regulated)	17q11.2	-1.71144562259331	5.07468191882877	0.00124975159484462
34800_at	LRIG1	leucine-rich repeats and immunoglobulin-like domains 1	3p14	-1.71047613139782	4.35481278417051	0.000235873684230826
2057_g_at	FGFR1	fibroblast growth factor receptor 1	8p12	-1.70581045013282	6.36674021479801	7.27931544102485e-05
608_at	APOE	apolipoprotein E	19q13.2	-1.70327159569027	6.88766234589044	0.000244167096284403
1801_at	BARD1	BRCA1 associated RING domain 1	2q34-q35	-1.70079783601465	5.10814750433586	8.16962609862414e-06
40726_at	KIF11	kinesin family member 11	10q24.1	-1.67918026256539	5.59632486222272	0.00052022721999773
31438_s_at	CD163	CD163 molecule	12p13.3	-1.67346304396767	3.51360617886428	9.56696692744786e-05
31792_at	ANXA3	annexin A3	4q21.21	-1.67213402236747	3.71698411802820	0.00375879576623668
40071_at	CYP1B1	cytochrome P450, family 1, subfamily B, polypeptide 1	2p21	-1.65535886776229	3.49374568805383	0.00285574113955283
40953_at	CNN3	calponin 3, acidic	1p22-p21	-1.65294352030452	8.43404834531032	2.72605690948029e-05
34407_at	RARRES2	retinoic acid receptor responder (tazarotene induced) 2	7q36.1	-1.64939533731514	6.05568054706529	0.000147063705860591
280_g_at	NR4A1	nuclear receptor subfamily 4, group A, member 1	12q13	-1.64931069959161	4.99131632279184	0.00696508753476034
32314_g_at	TPM2	tropomyosin 2 (beta)	9p13	-1.64479737439273	8.50345692678691	0.00158552061488507
34563_at	KIF14	kinesin family member 14	1q32.1	-1.64116013082629	4.60765891113618	0.000272036711385687
1520_s_at	IL1B	interleukin 1, beta	2q14	-1.63877981818677	3.86771708179228	0.00136376168549693
32227_at	SRGN	serglycin	10q22.1	-1.63099681017070	6.1895978378767	0.00206026262114485
37391_at	CTSL1	cathepsin L1	9q21.33	-1.62769164977085	8.11230893076681	3.72203965125203e-05
35995_at	ZWINT	ZW10 interactor	10q21-q22	-1.62754660206441	7.11184873572268	0.000603965885827898
41718_g_at	FADS1	fatty acid desaturase 1	11q12.2-q13.1	-1.62556315065608	5.72104006542514	3.11140670241223e-05
39409_at	C1R	complement component 1, r subcomponent	12p13	-1.62047806957909	7.44885767442252	0.00125391179189949
36879_at	TYMP	thymidine phosphorylase	22q13	-1.61266507145643	6.34954778050317	0.00155510816253212
859_at	CYP1B1	cytochrome P450, family 1, subfamily B, polypeptide 1	2p21	-1.61198556852275	3.4467917166051	0.00537759989876069
234_s_at	PTN	pleiotrophin	7q33	-1.60978226952739	5.26938151278988	0.00361153214694935
38406_f_at	PTGDS	prostaglandin D2 synthase 21kDa (brain)	9q34.2-q34.3	-1.59837928676900	3.80031164890401	0.000838925417797739
32102_at	SACS	spastic ataxia of Charlevoix-Saguenay (sacsin)	13q12	-1.59049921611341	3.94109820615599	0.000563529757920449
35219_at	MXRA8	matrix-remodelling associated 8	1p36.33	-1.58884642827103	5.73297156461087	0.000303962683053030
34095_f_at	IGHG1	immunoglobulin heavy constant gamma 1 (G1m marker)	14q32.33	-1.58254062589170	4.04320884980689	0.00116440776932629
34852_g_at	AURKA	aurora kinase A	20q13	-1.57656888615680	4.69326422654976	0.00052100206845606
286_at				-1.57599464199914	7.4461976564703	0.00104206398438662
36892_at	ITGA7	integrin, alpha 7	12q13	-1.57403019596408	4.57968047255989	0.00504961142574852
39402_at	IL1B	interleukin 1, beta	2q14	-1.57059024570937	4.04389228768028	0.00152888378308020
1945_at	CCNB1	cyclin B1	5q12	-1.56864225754697	5.53931607249245	0.000626198403793465
39425_at	TXNRD1	thioredoxin reductase 1	12q23-q24.1	-1.56828106540090	6.14896216217862	0.000172766476803497
41191_at	PALLD	palladin, cytoskeletal associated protein	4q32.3	-1.56430708744074	8.32547885044674	0.00188858679684338
41400_at	TK1	thymidine kinase 1, soluble	17q23.2-q25.3	-1.56178057994606	6.0780845065751	5.07749421557775e-05
37544_at	NFIL3	nuclear factor, interleukin 3 regulated	9q22	-1.55915304062863	5.73997027326013	0.000267018372422014
38833_at	HLA-DPA1	major histocompatibility complex, class II, DP alpha 1	6p21.3	-1.55871961911734	8.112268401674	0.00102651772453963
38116_at	KIAA0101	KIAA0101	15q22.31	-1.55544752142557	7.47498632679214	0.000471204627464972
40412_at	PTTG1	pituitary tumor-transforming 1	5q35.1	-1.55497562624710	7.24586815451154	0.000299020893559143
33440_at	ZEB1	zinc finger E-box binding homeobox 1	10p11.2	-1.55412577217790	4.49566172822161	3.78168665623102e-05
216_at	PTGDS	prostaglandin D2 synthase 21kDa (brain)	9q34.2-q34.3	-1.55263373930740	4.49198191535132	0.000120350142722828
41723_s_at				-1.54184784093859	8.42708017285958	0.0047217253027947
40145_at	TOP2A	topoisomerase (DNA) II alpha 170kDa	17q21-q22	-1.53631383100900	6.36795077215727	0.000437440830723296
35303_at	INSIG1	insulin induced gene 1	7q36	-1.53631095712183	5.56128289757625	2.95549580548528e-05
837_s_at	ME1	malic enzyme 1, NADP(+)-dependent, cytosolic	6q12	-1.53575463693786	4.21220791314341	0.000247260172504125
32847_at	MYLK	myosin light chain kinase	3q21	-1.53535767226827	6.6784322211498	0.00429062852448982
36659_at	COL4A2	collagen, type IV, alpha 2	13q34	-1.53443866506779	9.55373242578954	3.56884523513429e-05
35822_at				-1.52923705967512	5.84342527189841	0.00920444980965107
40518_at	PTPRC	protein tyrosine phosphatase, receptor type, C	1q31-q32	-1.52903348484242	6.306389824488	0.000774409445701033
1599_at	CDKN3	cyclin-dependent kinase inhibitor 3	14q22	-1.51992684820266	4.69472340582409	0.000171589572754389
37305_at	EZH2	enhancer of zeste homolog 2 (Drosophila)	7q35-q36	-1.51366806485757	4.33528582299772	0.000726074995982263
910_at	TK1	thymidine kinase 1, soluble	17q23.2-q25.3	-1.51221351804474	6.65995760389328	0.000315375560254568
1505_at	TYMS	thymidylate synthetase	18p11.32	-1.51130058766805	5.8265097126183	0.00140642920169478
37918_at	ITGB2	integrin, beta 2 (complement component 3 receptor 3 and 4 subunit)	21q22.3	-1.50821856366851	4.13362282564658	0.000499860235439201
37039_at	HLA-DRA	major histocompatibility complex, class II, DR alpha	6p21.3	-1.50783704012865	9.10850067836922	0.0023116095613399
39145_at	MYL9	myosin, light chain 9, regulatory	20q11.23	-1.50495460187069	8.4786701561585	0.0053330163092692
37219_at	CXCL9	chemokine (C-X-C motif) ligand 9	4q21	-1.50451326077992	3.64071103613365	0.00605032617676293
39677_at	GINS1	GINS complex subunit 1 (Psf1 homolog)	20p11.21	-1.50438739241922	4.8266726438996	0.000686824265110481
32662_at	MDC1	mediator of DNA-damage checkpoint 1	6p21.3	-1.50344054739052	5.67881149305436	0.000121204608346316
32609_at				-1.50340978647269	7.39695249973033	0.000521721421542097
36813_at	TRIP13	thyroid hormone receptor interactor 13	5p15.33	-1.4971550955464	5.44831637785814	0.000954325526741633
38442_at	MFAP2	microfibrillar-associated protein 2	1p36.1-p35	-1.49710716643707	4.81198521781976	0.00142752001716437
40347_at	ANP32E	acidic (leucine-rich) nuclear phosphoprotein 32 family, member E	1q21.2	-1.49663044708056	4.18792451326481	0.000115322067746889
33127_at	LOXL2	lysyl oxidase-like 2	8p21.3	-1.49147660996027	3.90622521273816	0.00138938402803327
32098_at	COL6A2	collagen, type VI, alpha 2	21q22.3	-1.49010176150456	4.6169193591648	0.00213515962294017
572_at	TTK	TTK protein kinase	6q13-q21	-1.48707893197312	3.790004497827	0.000170228321000767
1403_s_at	CCL5	chemokine (C-C motif) ligand 5	17q11.2-q12	-1.48685286911921	4.30842190714206	0.0039723869715452
37762_at	EMP1	epithelial membrane protein 1	12p12.3	-1.48519454526608	5.78602361238396	0.00132066402602746
38065_at	HMGB2	high-mobility group box 2	4q31	-1.48367650102128	8.72608197390259	0.000502181913928189
1278_at	AXL	AXL receptor tyrosine kinase	19q13.1	-1.47265667514567	5.07285977265402	0.00315302770553203
40585_at	ADCY7	adenylate cyclase 7	16q12.1	-1.47082958833718	3.44201339803035	0.000341388598929311
40771_at	MSN	moesin	Xq11.1	-1.46690529991762	9.92735013236929	0.000111294145625439
40856_at	SERPINF1	serpin peptidase inhibitor, clade F (alpha-2 antiplasmin, pigment epithelium derived factor), member 1	17p13.1	-1.46416594626142	7.54281406037927	0.000121204608346316
1693_s_at	TIMP1	TIMP metallopeptidase inhibitor 1	Xp11.3-p11.23	-1.45948682533224	10.0800604214434	0.000135691477138565
35169_at	COL16A1	collagen, type XVI, alpha 1	1p35-p34	-1.45879983683105	5.81480960487789	0.000247260172504125
31609_s_at	PCOLCE	procollagen C-endopeptidase enhancer	7q22	-1.45782899556332	5.62947871677708	3.80064092120782e-05
39330_s_at	ACTN1	actinin, alpha 1	14q22-q24	-1.45630962112925	8.79749405676117	0.000355259887549154
38378_at	CD53	CD53 molecule	1p13	-1.4545504607748	3.79442373620773	0.000609426111585747
36577_at	FERMT2	fermitin family member 2	14q22.1	-1.44757991147630	5.77412479020307	0.00126880790365454
33919_at	TSPAN4	tetraspanin 4	11p15.5	-1.44682643544599	5.43650908354352	1.59313318826156e-06
32749_s_at	FLNA	filamin A, alpha	Xq28	-1.44663693490047	8.88122989002701	0.00141710983336838
33240_at	PDZRN3	PDZ domain containing ring finger 3	3p13	-1.44256105383882	3.72665683059647	0.00496110750405963
38826_at	SEPT6	septin 6	Xq24	-1.44227182844012	4.06342644803479	0.000502181913928189
41583_at	FEN1	flap structure-specific endonuclease 1	11q12	-1.44172692169415	7.37145157857765	0.000107415619977883
37302_at	CENPF	centromere protein F, 350/400kDa (mitosin)	1q32-q41	-1.43493987994919	3.88629520767022	0.00244269224042275
34736_at	CCNB1	cyclin B1	5q12	-1.43388570387445	5.79493029733972	0.000630187497697701
40990_at	TSPAN5	tetraspanin 5	4q23	-1.43157282602881	4.98969516844973	0.00184087062825735
36496_at	IMPA2	inositol(myo)-1(or 4)-monophosphatase 2	18p11.2	-1.42721315015868	5.59461613415847	0.00096326803835184
40202_at	KLF9	Kruppel-like factor 9	9q13	-1.42243661304664	5.68547103775072	0.000193611372397138
33900_at	FSTL3	follistatin-like 3 (secreted glycoprotein)	19p13	-1.42036367084085	5.53737102003241	0.000397997372492795
38433_at	AXL	AXL receptor tyrosine kinase	19q13.1	-1.41186698706975	4.83040900440075	0.00632525014224925
38096_f_at	HLA-DPB1	major histocompatibility complex, class II, DP beta 1	6p21.3	-1.40894858952776	9.09162808046494	0.00174276070451248
39327_at	PXDN	peroxidasin homolog (Drosophila)	2p25	-1.40353945905753	6.91951159841151	0.00199557306207717
39829_at	ARL4C	ADP-ribosylation factor-like 4C	2q37.1	-1.40130316242147	5.91653001534841	0.000159693970822441
36878_f_at	HLA-DQB1	major histocompatibility complex, class II, DQ beta 1	6p21.3	-1.40066927729682	5.54196209493231	0.00479102759461599
1402_at	LYN	v-yes-1 Yamaguchi sarcoma viral related oncogene homolog	8q13	-1.39718213325518	6.01558235545605	0.000499684245052465
39277_at	OSMR	oncostatin M receptor	5p13.1	-1.39488975447801	3.77529786285957	0.00675352023062158
33705_at	PDE4B	phosphodiesterase 4B, cAMP-specific	1p31	-1.39455125921057	3.74257611413961	0.00913930234796792
33813_at	TNFRSF1B	tumor necrosis factor receptor superfamily, member 1B	1p36.22	-1.39351329210755	5.83381495620232	1.33326366132367e-05
31315_at				-1.39335734038165	4.1707151520051	0.00310114405411572
35366_at	NID1	nidogen 1	1q43	-1.39078005619659	6.58676060562444	0.000171589572754389
36423_at	NUPR1	nuclear protein, transcriptional regulator, 1	16p11.2	-1.39051603846499	5.89556244095576	0.00967802590996518
1516_g_at	FEN1	flap structure-specific endonuclease 1	11q12	-1.38939863409389	6.87409145048728	0.000213204179935969
37671_at	LAMA4	laminin, alpha 4	6q21	-1.38695816880007	5.25373121361541	0.000419134115299698
39333_at	COL4A1	collagen, type IV, alpha 1	13q34	-1.38611077773011	8.98071062593095	0.000198546495464054
40117_at	MCM6	minichromosome maintenance complex component 6	2q21	-1.38499622510264	7.5802287894896	0.00015661467494998
36908_at				-1.37855721362943	5.0839909526466	0.000173559729310066
38414_at	CDC20	cell division cycle 20 homolog (S. cerevisiae)	1p34.1	-1.37833849685317	7.36632203983757	0.000192498135334182
41446_f_at				-1.37459964114684	7.49242389211519	0.00187180736674432
33328_at	HEG1	HEG homolog 1 (zebrafish)	3q21.2	-1.37159308835775	6.37468589341119	0.000542585393220762
40193_at	ENO2	enolase 2 (gamma, neuronal)	12p13	-1.36771724800231	6.8902011208519	0.00612177481337741
35331_at	CTNNAL1	catenin (cadherin-associated protein), alpha-like 1	9q31.2	-1.35827927490228	4.52138560200067	0.00058493716046549
37402_at	RNASE1	ribonuclease, RNase A family, 1 (pancreatic)	14q11.2	-1.35337664933722	7.70482816901587	0.000402052260351425
41138_at	CD99	CD99 molecule	Xp22.32	-1.35319371320996	9.35141913121679	9.19911490925655e-07
35312_at	MCM2	minichromosome maintenance complex component 2	3q21	-1.35199967293204	5.67217880630404	0.000778420480885528
38158_at	ESPL1	extra spindle pole bodies homolog 1 (S. cerevisiae)	12q	-1.35170074283922	5.0279432225342	0.000494821783081034
39329_at	ACTN1	actinin, alpha 1	14q22-q24	-1.34610332101826	8.32767024589766	0.00105916958618439
1803_at	CDK1	cyclin-dependent kinase 1	10q21.1	-1.34607731350112	5.94607860999565	0.000240424869072211
39317_at	CMAH	cytidine monophosphate-N-acetylneuraminic acid hydroxylase (CMP-N-acetylneuraminate monooxygenase) pseudogene	6p21.32	-1.34527568414863	3.22022503554335	0.00834333264787916
904_s_at	TOP2A	topoisomerase (DNA) II alpha 170kDa	17q21-q22	-1.33991507491902	5.69084858099899	0.00052100206845606
41745_at	IFITM3	interferon induced transmembrane protein 3 (1-8U)	11p15.5	-1.33660467468916	9.5124753414851	7.39533071526237e-05
32755_at	ACTA2	actin, alpha 2, smooth muscle, aorta	10q23.3	-1.33652778395713	10.6546710045416	0.00116468292406852
34715_at	FOXM1	forkhead box M1	12p13	-1.33597360539765	5.95481880810745	0.000699910694888062
1648_at	OSMR	oncostatin M receptor	5p13.1	-1.33520186852111	3.77499325674741	0.00616069472487264
31622_f_at	MT1F	metallothionein 1F	16q13	-1.33172808738401	6.74369446900953	0.00166454130927701
37573_at	ANGPTL2	angiopoietin-like 2	9q34	-1.32780992286232	6.14679878282663	0.000125882725520949
35249_at	CCNE2	cyclin E2	8q22.1	-1.32615577539322	4.06437440001627	0.00401571625601837
129_g_at	CTSK	cathepsin K	1q21	-1.32564733257705	4.63004331138306	0.000403585162844162
39594_f_at	MT1H	metallothionein 1H	16q13	-1.32314612807460	7.27926658212041	0.000685332322489786
675_at	IFITM1	interferon induced transmembrane protein 1 (9-27)	11p15.5	-1.31273225473955	7.8713071020053	0.00279938293235854
38272_at	DUSP14	dual specificity phosphatase 14	17q12	-1.31244833218400	4.80374644777734	3.56593686915796e-05
32168_s_at	RCAN1	regulator of calcineurin 1	21q22.1-q22.2	-1.30562274318147	4.54201016503249	0.000133712238952981
37228_at	PLK1	polo-like kinase 1	16p12.2	-1.30361923827982	5.42342131753068	0.000424724891653469
39066_at	MFAP4	microfibrillar-associated protein 4	17p11.2	-1.29705819617403	5.87407555831844	0.00488911303620322
287_at	ATF3	activating transcription factor 3	1q32.3	-1.29620086015372	4.89093171406226	0.0078609659911692
1370_at	IL7R	interleukin 7 receptor	5p13	-1.28767717076930	3.84692323358361	0.00188858679684338
41764_at	APOC1	apolipoprotein C-I	19q13.2	-1.28393659149538	5.22333512651843	0.0017254695845629
38323_at	CPVL	carboxypeptidase, vitellogenic-like	7p15.1	-1.28367240113509	3.28097437494106	0.0020238471441501
36943_r_at	PLAGL1	pleiomorphic adenoma gene-like 1	6q24-q25	-1.28301365761627	3.4354542194309	0.00204739785026757
36918_at	GUCY1A3	guanylate cyclase 1, soluble, alpha 3	4q31.1-q31.2	-1.28117996933892	4.22104506984883	0.000129750552181855
36837_at	KIF2C	kinesin family member 2C	1p34.1	-1.27957036102297	4.92399755611686	0.000331435264465413
32616_at	LYN	v-yes-1 Yamaguchi sarcoma viral related oncogene homolog	8q13	-1.27791440099590	5.50577101221515	0.000312437087043418
35643_at	NUCB2	nucleobindin 2	11p15.1	-1.26800612554234	5.82577485593221	2.85061681973977e-05
39338_at	S100A10	S100 calcium binding protein A10	1q21	-1.26688808550234	9.50794509639833	0.00833865322361599
676_g_at				-1.26405777107466	10.7871841631801	0.000121204608346316
1583_at	TNFRSF1B	tumor necrosis factor receptor superfamily, member 1B	1p36.22	-1.26383998663077	4.03330857845331	0.000312894914385997
1515_at	FEN1	flap structure-specific endonuclease 1	11q12	-1.26225990242868	5.32155716195562	0.000272036711385687
36206_at	SLC16A1	solute carrier family 16, member 1 (monocarboxylic acid transporter 1)	1p12	-1.25857610972182	3.23848334509333	0.00666602252294999
40571_at	MYO5A	myosin VA (heavy chain 12, myoxin)	15q21	-1.24709685376372	4.21972844037595	0.000768475912470092
38636_at	ISLR	immunoglobulin superfamily containing leucine-rich repeat	15q23-q24	-1.24690771534475	5.32184051349060	0.00178167459461946
34091_s_at	VIM	vimentin	10p13	-1.24589272758567	11.7255989788723	0.000374547226535282
36007_at	OLFML2B	olfactomedin-like 2B	1q23.3	-1.24515255217628	5.45664680389583	0.000450353114013796
34898_at	AREG	amphiregulin	4q13-q21	-1.24219979277678	4.00378791282533	0.00765677959852945
37684_at	SLCO2B1	solute carrier organic anion transporter family, member 2B1	11q13	-1.24203047673082	3.96017305817467	0.000803127145403809
38621_at	DDAH2	dimethylarginine dimethylaminohydrolase 2	6p21.3	-1.24161843267945	4.69309108765783	8.50577832689644e-05
33821_at	ELOVL5	ELOVL family member 5, elongation of long chain fatty acids (FEN1/Elo2, SUR4/Elo3-like, yeast)	6p21.1-p12.1	-1.22978626734964	8.85824681922924	0.000112520585448395
411_i_at	IFITM2	interferon induced transmembrane protein 2 (1-8D)	11p15.5	-1.22747284500254	7.36278754622108	0.00699277741150836
33731_at	SLC7A7	solute carrier family 7 (cationic amino acid transporter, y+ system), member 7	14q11.2	-1.22339469742874	3.4700892468106	0.00040788561152906
35909_at	PHLDA1	pleckstrin homology-like domain, family A, member 1	12q15	-1.22321097045998	5.74839848856942	0.00102302643542096
36773_f_at	HLA-DQB1	major histocompatibility complex, class II, DQ beta 1	6p21.3	-1.22012384018722	6.44142254951523	0.00794037660427564
41449_at	SGCE	sarcoglycan, epsilon	7q21.3	-1.21691953025053	5.36931268139977	0.00592155510976595
128_at	CTSK	cathepsin K	1q21	-1.21493076823627	3.93172184778658	0.00128651030926187
1507_s_at	EDNRA	endothelin receptor type A	4q31.22	-1.21412195166841	4.22614014409772	0.00098743456448337
609_f_at	MT1B	metallothionein 1B	16q13	-1.21090621872597	6.10885529669928	0.00138892797412714
33802_at	HMOX1	heme oxygenase (decycling) 1	22q12	-1.20867145922281	4.25106539770675	0.00357025853695064
32066_g_at	CREM	cAMP responsive element modulator	10p11.21	-1.20561156915250	4.24278912921109	0.000226688936205991
471_f_at	TUBB3	tubulin, beta 3	16q24.3	-1.20327777345063	7.95358458663977	0.00264007424083865
39673_i_at	ECM2	extracellular matrix protein 2, female organ and adipocyte specific	9q22.3	-1.20127901709531	3.09921317622829	7.94784765923903e-05
37741_at	PYCR1	pyrroline-5-carboxylate reductase 1	17q25.3	-1.20108405242873	4.74275424256237	0.000936645227392818
41433_at	VCAM1	vascular cell adhesion molecule 1	1p32-p31	-1.20089664149158	3.11475979465461	0.000617957965663008
32243_g_at	CRYAB	crystallin, alpha B	11q22.3-q23.1	-1.19961953952163	5.58947045280289	0.00565222613808088
37099_at	ALOX5AP	arachidonate 5-lipoxygenase-activating protein	13q12	-1.19873056990055	4.23587263330426	0.00967647555284492
33283_at	ARRB2	arrestin, beta 2	17p13	-1.19680837101788	6.70110502482259	3.87058686330685e-07
39775_at	SERPING1	serpin peptidase inhibitor, clade G (C1 inhibitor), member 1	11q12-q13.1	-1.19333765203161	8.98545754640392	0.00623616077332093
39822_s_at	GADD45B	growth arrest and DNA-damage-inducible, beta	19p13.3	-1.19270223451957	5.77001688208498	0.00111256176819118
120_at	ITGA1	integrin, alpha 1	5q11.2	-1.19216869491676	5.23935872912066	0.000369999043360512
1731_at	PDGFRA	platelet-derived growth factor receptor, alpha polypeptide	4q12	-1.19127282331105	4.65256058998882	0.00068934614495467
31623_f_at	MT1A	metallothionein 1A	16q13	-1.18877883284521	8.89231337589694	0.00339001661838627
41350_at	COL6A1	collagen, type VI, alpha 1	21q22.3	-1.18525019619704	5.43505724827551	0.00285574113955283
37899_at	TYMS	thymidylate synthetase	18p11.32	-1.1746277675741	5.17433968752735	0.00154474209282998
37345_at	CALU	calumenin	7q32.1	-1.17372119446252	7.94591587599677	0.000103478114723189
1319_at	DDR2	discoidin domain receptor tyrosine kinase 2	1q23.3	-1.17334541796337	3.85009656920386	0.00280704890801632
37823_at	CCL8	chemokine (C-C motif) ligand 8	17q11.2	-1.17109918524589	3.08383599173415	0.00242271344088845
34714_at	SAMHD1	SAM domain and HD domain 1	20pter-q12	-1.17004717497272	3.43636726013924	0.000419134115299698
33402_at	KDELR3	KDEL (Lys-Asp-Glu-Leu) endoplasmic reticulum protein retention receptor 3	22q13.1	-1.16351678084336	3.31109620556166	0.000768475912470092
36791_g_at	TPM1	tropomyosin 1 (alpha)	15q22.1	-1.16217340943901	7.94752533639443	0.00622856610716242
36792_at	TPM1	tropomyosin 1 (alpha)	15q22.1	-1.16121717457619	7.55391102875764	0.00789039746269386
1633_g_at	PIM2	pim-2 oncogene	Xp11.23	-1.16022258654962	5.81626276889312	3.78168665623102e-05
36753_at	LILRB4	leukocyte immunoglobulin-like receptor, subfamily B (with TM and ITIM domains), member 4	19q13.4	-1.15975966917719	5.00802429240953	0.00335744951314432
35740_at	EMILIN1	elastin microfibril interfacer 1	2p23.3-p23.2	-1.15803987925641	3.54597353758471	0.000685332322489786
34367_at	PHGDH	phosphoglycerate dehydrogenase	1p12	-1.15538558821009	5.91913681064821	0.00231455490254766
1854_at	MYBL2	v-myb myeloblastosis viral oncogene homolog (avian)-like 2	20q13.1	-1.15246814972319	3.39805691629848	0.00527434030456652
37351_at	UPP1	uridine phosphorylase 1	7p12.3	-1.15194191836031	6.14422493603176	0.00597600193762593
40456_at	SLC39A8	solute carrier family 39 (zinc transporter), member 8	4q22-q24	-1.15049456428615	4.12481748641728	0.00284713237240033
35735_at	GBP1	guanylate binding protein 1, interferon-inducible, 67kDa	1p22.2	-1.14969354437320	4.77195774895464	0.00459042027509756
1055_g_at	RFC4	replication factor C (activator 1) 4, 37kDa	3q27	-1.14855591203296	5.86947299118668	0.00303697817081779
41609_at	HLA-DMB	major histocompatibility complex, class II, DM beta	6p21.3	-1.14615404340291	4.10801974500354	0.00565222613808088
37759_at	LAPTM5	lysosomal protein transmembrane 5	1p34	-1.14298232697298	7.02359290066474	0.00674390042285508
33371_s_at	RAB31	RAB31, member RAS oncogene family	18p11.3	-1.13524002427405	6.99880285656359	0.00577478047361518
40766_at				-1.13044569126118	7.69256416633951	0.00486087484844627
231_at	TGM2	transglutaminase 2 (C polypeptide, protein-glutamine-gamma-glutamyltransferase)	20q12	-1.13035147980732	4.43099949867784	0.000824093636106695
37975_at	CYBB	cytochrome b-245, beta polypeptide	Xp21.1	-1.12686203375658	3.63184167071988	0.00322742935721281
37689_s_at	FCGR2A	Fc fragment of IgG, low affinity IIa, receptor (CD32)	1q23	-1.12319121887218	3.45265780708812	0.00211948110289286
32838_at	MYH10	myosin, heavy chain 10, non-muscle	17p13	-1.12189169589139	5.19552358922363	1.58126858076484e-05
36790_at	TPM1	tropomyosin 1 (alpha)	15q22.1	-1.12188184966861	9.20968212908014	0.00279292144827959
980_at	NPC1	Niemann-Pick disease, type C1	18q11-q12	-1.12093906197970	4.52310451921705	0.00036892546595475
245_at	SELL	selectin L	1q23-q25	-1.1181023399095	3.0768043587416	0.00939774785071556
33372_at	RAB31	RAB31, member RAS oncogene family	18p11.3	-1.11724298452181	5.17862162740549	0.00833865322361599
1943_at	CCNA2	cyclin A2	4q25-q31	-1.11172318666447	4.57965960957712	0.00307499604414213
32644_at	NUP188	nucleoporin 188kDa	9q34.11	-1.11114475017459	5.35025757044821	0.00052100206845606
41165_g_at	IGHM	immunoglobulin heavy constant mu	14q32.33	-1.10851708821626	4.03122382100074	0.00444871380956339
32138_at	DNM1	dynamin 1	9q34	-1.10502910413754	4.11583532670726	0.00169928273516461
37493_at	CSF2RB	colony stimulating factor 2 receptor, beta, low-affinity (granulocyte-macrophage)	22q13.1	-1.10466689589410	3.00425799115582	0.00138223423200011
41439_at	MYO1B	myosin IB	2q12-q34	-1.09876475632297	7.07513771295852	0.00281516683472843
37347_at	CKS1B	CDC28 protein kinase regulatory subunit 1B	1q21.2	-1.09225321905892	6.78675379282436	0.00148495703634962
41409_at	C1orf38	chromosome 1 open reading frame 38	1p35.3	-1.08967344377539	3.88487720174219	0.000191802344182874
36674_at	CCL4	chemokine (C-C motif) ligand 4	17q12	-1.08826665025531	3.39535390357876	0.0079414186664237
33641_g_at	AIF1	allograft inflammatory factor 1	6p21.3	-1.08755297505659	4.66928776665271	0.000113133454993333
159_at	VEGFC	vascular endothelial growth factor C	4q34.3	-1.08641792218910	3.20169621669098	0.00433158230674927
1665_s_at	TYMP	thymidine phosphorylase	22q13	-1.08604748911565	2.94208905796359	0.00307499604414213
35839_at	SQLE	squalene epoxidase	8q24.1	-1.08255542626523	4.89832595127865	0.00184899666723912
38842_at	AMOTL2	angiomotin like 2	3q21-q22	-1.08163792012396	4.56252575078623	0.00200022060857608
40580_r_at	PTMS	parathymosin	12p13	-1.07732068059699	5.72436473177841	0.00105405755382707
35723_at	NUDT1	nudix (nucleoside diphosphate linked moiety X)-type motif 1	7p22	-1.07003476255262	4.91498280748295	0.000768475912470092
39407_at	BMP1	bone morphogenetic protein 1	8p21.3	-1.06944290594774	3.97799321745009	0.00127665094888518
31586_f_at				-1.06823770190398	5.16192670434045	0.00468239955986568
39082_at	ANXA6	annexin A6	5q33.1	-1.06384413799456	3.58982876208521	0.000260554743951530
38312_at	OLFML2A	olfactomedin-like 2A	9q33.3	-1.06151798985804	3.56174876827044	0.00592873386120934
33834_at	CXCL12	chemokine (C-X-C motif) ligand 12	10q11.1	-1.05989400190214	2.98656005473743	0.00292954935164283
37398_at	PECAM1	platelet/endothelial cell adhesion molecule	17q23	-1.05569579515213	6.025776123713	0.00115690742544211
38278_at	ARID5A	AT rich interactive domain 5A (MRF1-like)	2q11.2	-1.05162108645798	5.32853801084035	0.000723605174453782
894_g_at	UBE2S	ubiquitin-conjugating enzyme E2S	19q13.43	-1.05051769407270	7.20006323023417	0.00927624850622716
32120_at	SPAG5	sperm associated antigen 5	17q11.2	-1.04990869227483	5.05718391740901	0.00627534428941472
33405_at	CAP2	CAP, adenylate cyclase-associated protein, 2 (yeast)	6p22.3	-1.04701011687901	3.88624037823849	0.00180798236321852
37484_at	ITGA1	integrin, alpha 1	5q11.2	-1.04555206946773	4.10590941635536	0.000263505775638162
36749_at	CPA3	carboxypeptidase A3 (mast cell)	3q21-q25	-1.04519505769686	3.00650814656149	0.00221796328018950
527_at	CENPA	centromere protein A	2p24-p21	-1.03676130441677	3.91181526521164	0.00871960661568641
39373_at	FADS1	fatty acid desaturase 1	11q12.2-q13.1	-1.03396309101682	4.19955897382458	0.00345466163582902
39640_at	GFPT2	glutamine-fructose-6-phosphate transaminase 2	5q34-q35	-1.03371059080763	2.84649446555512	0.00290944959366942
40619_at	UBE2S	ubiquitin-conjugating enzyme E2S	19q13.43	-1.03193784926144	7.50224263065069	0.00920095057095212
34851_at	AURKA	aurora kinase A	20q13	-1.03074068395723	5.00276719202051	0.00087999673636424
1405_i_at	CCL5	chemokine (C-C motif) ligand 5	17q11.2-q12	-1.02579167864627	3.72964769322613	0.00592873386120934
32718_at	TPST1	tyrosylprotein sulfotransferase 1	7q11.21	-1.01919413424235	5.14254395555522	7.06685281309983e-05
31499_s_at	FCGR3B	Fc fragment of IgG, low affinity IIIb, receptor (CD16b)	1q23	-1.01445138221141	3.37348715503545	0.00328990884504969
268_at	PECAM1	platelet/endothelial cell adhesion molecule	17q23	-1.01120213521608	4.12911415920926	0.000334558539323975
1375_s_at	TIMP2	TIMP metallopeptidase inhibitor 2	17q25	-1.01028638167998	3.26979643615132	0.00340987919287057
37148_at				-1.01000119423645	2.85847972476685	0.00257471888527571
38407_r_at	PTGDS	prostaglandin D2 synthase 21kDa (brain)	9q34.2-q34.3	-1.00564954832041	3.03463277731305	0.00630041070490937
479_at	DAB2	disabled homolog 2, mitogen-responsive phosphoprotein (Drosophila)	5p13	-1.00039843886466	5.75723025990805	0.00929248592560772
38098_at	LPIN1	lipin 1	2p25.1	-1.00036923678707	4.53246573567473	0.00725972952550516
1495_at	LTBP1	latent transforming growth factor beta binding protein 1	2p22-p21	-0.999414211086143	6.35213466647308	0.00163822970366329
36347_f_at	HIST1H2BN	histone cluster 1, H2bn	6p22.1	-0.99857230585809	6.19353320815091	0.00204272852944409
37047_at	NPC1	Niemann-Pick disease, type C1	18q11-q12	-0.993086052140873	6.23403864508276	0.000296826086354411
37324_at	TFRC	transferrin receptor (p90, CD71)	3q29	-0.993073272212708	8.60380576467074	0.00328990884504969
1536_at	CDC6	cell division cycle 6 homolog (S. cerevisiae)	17q21.3	-0.989504162322538	3.07336352504360	0.00321731311349721
38847_at	MELK	maternal embryonic leucine zipper kinase	9p13.2	-0.988784712395034	2.91968736733483	0.000290036103825603
40419_at	STOM	stomatin	9q34.1	-0.988036521951823	7.94321969341823	0.00287870383152474
40697_at	CCNA2	cyclin A2	4q25-q31	-0.986288917806832	4.30699225177672	0.00370497901825748
36053_at	CDKN2C	cyclin-dependent kinase inhibitor 2C (p18, inhibits CDK4)	1p32	-0.985829629419238	4.09318526110272	0.00895780841526526
33924_at	DENND5A	DENN/MADD domain containing 5A	11p15.4	-0.981666480122557	6.01469804423972	0.00109267622893266
35694_at	MAP4K4	mitogen-activated protein kinase kinase kinase kinase 4	2q11.2-q12	-0.981229748427092	4.5620449224737	0.00152701522487023
583_s_at	VCAM1	vascular cell adhesion molecule 1	1p32-p31	-0.976951931430863	2.83729694953445	0.00291538167854428
41656_at	NMT2	N-myristoyltransferase 2	10p13	-0.976384171207256	3.25913288614793	0.00822408824915103
40328_at	TWIST1	twist homolog 1 (Drosophila)	7p21.2	-0.970609273128878	3.55936523030344	0.00511466617296643
41620_at	DOCK4	dedicator of cytokinesis 4	7q31.1	-0.965191912253188	3.17780112440797	0.00477742983180559
32363_at	CH25H	cholesterol 25-hydroxylase	10q23	-0.96261648897071	3.03630026846093	0.00909502773342096
41549_s_at	AP1S2	adaptor-related protein complex 1, sigma 2 subunit	Xp22.2	-0.959362850306232	3.16045778052529	0.00115717957357902
32526_at	JAM3	junctional adhesion molecule 3	11q25	-0.957463413478464	3.38765636750064	0.00164323972686897
36369_at	PTRF	polymerase I and transcript release factor	17q21.2	-0.95565634367672	4.59333495387821	0.00479061033633341
36095_at	CLIP3	CAP-GLY domain containing linker protein 3	19q13.12	-0.954266300085987	4.85560536094582	0.00480658735019527
37747_at	ANXA5	annexin A5	4q26-q28	-0.94511974344066	8.00474247006034	0.00650018772897864
37018_at	HIST1H1C	histone cluster 1, H1c	6p21.3	-0.944088418159412	3.32684569372842	0.00322484511088863
39269_at	RFC3	replication factor C (activator 1) 3, 38kDa	13q13.2	-0.940889013600715	3.28885196616657	0.00328642022911518
33787_at	NUAK1	NUAK family, SNF1-like kinase, 1	12q23.3	-0.939122561868724	5.83369426917197	0.00707640210607524
40019_at	EVI2B	ecotropic viral integration site 2B	17q11.2	-0.931339959054863	3.52373171862862	0.00518958421075233
39310_at	BDKRB2	bradykinin receptor B2	14q32.1-q32.2	-0.930407527944281	2.96355423699108	0.00213776147551278
1424_s_at	YWHAH	tyrosine 3-monooxygenase/tryptophan 5-monooxygenase activation protein, eta polypeptide	22q12.3	-0.928737890253805	9.8615503281881	2.07530539689374e-05
38976_at	CORO1A	coronin, actin binding protein, 1A	16p11.2	-0.927299890444989	5.57881646722178	0.00719252481684538
41447_at	CHSY1	chondroitin sulfate synthase 1	15q26.3	-0.927169068241255	6.17255177945989	6.97231813294605e-05
957_at	ARRB2	arrestin, beta 2	17p13	-0.926452970984917	4.13905710062422	2.24422760312813e-05
33324_s_at	CDK1	cyclin-dependent kinase 1	10q21.1	-0.923753710117871	4.56784891639756	0.00177538747613434
319_g_at	H1FX	H1 histone family, member X	3q21.3	-0.91958436740109	8.5753487804589	0.00148659072479875
37028_at	PPP1R15A	protein phosphatase 1, regulatory (inhibitor) subunit 15A	19q13.2	-0.918748489135942	7.09585662884795	0.00148495703634962
39649_at	ARHGAP4	Rho GTPase activating protein 4	Xq28	-0.918094304053415	4.07424722628879	0.00303697817081779
37231_at	DLGAP5	discs, large (Drosophila) homolog-associated protein 5	14q22.3	-0.917699370659879	4.16143411349702	0.000872454657295534
39428_at	SH2B3	SH2B adaptor protein 3	12q24	-0.917474335456726	5.34842912542261	0.00102302643542096
38121_at	WARS	tryptophanyl-tRNA synthetase	14q32.31	-0.916689783385936	6.77939475965895	0.000536914350898513
34721_at	FKBP5	FK506 binding protein 5	6p21.31	-0.914166695822573	2.91491253088592	0.00617634753823323
677_s_at	ACP5	acid phosphatase 5, tartrate resistant	19p13.3-p13.2	-0.908262455639935	3.08276331315036	0.00835201735459973
32661_s_at	MDC1	mediator of DNA-damage checkpoint 1	6p21.3	-0.906275285029323	5.21416479998803	0.000907701852188246
33121_g_at	RGS10	regulator of G-protein signaling 10	10q25	-0.905724262314045	6.16210914785068	0.00105439894646245
418_at	MKI67	antigen identified by monoclonal antibody Ki-67	10q26.2	-0.902574520874153	4.41299309698032	0.00133509162672359
41864_at	STX2	syntaxin 2	12q24.33	-0.899239245272659	3.58124995052893	0.000804738865892615
33893_r_at	CEP170	centrosomal protein 170kDa	1q44	-0.898215407606425	3.93881220738858	0.00635979822129675
32767_at	STIL	SCL/TAL1 interrupting locus	1p32	-0.89596737197374	3.93441908260537	0.00657219103411259
2024_s_at	LYN	v-yes-1 Yamaguchi sarcoma viral related oncogene homolog	8q13	-0.888878492296668	4.46910260180687	0.000430650707199265
32207_at	MPP1	membrane protein, palmitoylated 1, 55kDa	Xq28	-0.883849904525165	3.13033987579754	0.00507054543474815
38487_at	STAB1	stabilin 1	3p21.1	-0.879127149885143	4.47058386649849	0.00155510816253212
40512_at	CHN1	chimerin (chimaerin) 1	2q31.1	-0.87705363187083	4.66262135651082	0.000554217121662457
33431_at	FMOD	fibromodulin	1q32	-0.874338714438206	3.21613615559805	0.00228222968428681
1598_g_at	GAS6	growth arrest-specific 6	13q34	-0.872870344456178	3.19223138787392	0.00204456600177756
37044_at	PDIA5	protein disulfide isomerase family A, member 5	3q21.1	-0.86646415033045	4.6667061550593	0.000739878295963444
39030_at	RABAC1	Rab acceptor 1 (prenylated)	19q13.2	-0.86544299299689	6.31209112242066	0.00348565665682395
38201_at	BCAT1	branched chain amino-acid transaminase 1, cytosolic	12p12.1	-0.864646374951303	2.84775103547585	0.00403071456721957
38770_at	ADAM12	ADAM metallopeptidase domain 12	10q26.3	-0.856203833035352	2.94084060338457	0.00707640210607524
41720_r_at	FADS1	fatty acid desaturase 1	11q12.2-q13.1	-0.852203431900556	5.83641966308146	0.000640641601474573
41126_at	SLC1A4	solute carrier family 1 (glutamate/neutral amino acid transporter), member 4	2p15-p13	-0.851095519228095	3.65473954366274	0.0067709497172249
32067_at	CREM	cAMP responsive element modulator	10p11.21	-0.850218216752914	3.33981184850366	0.00339133081101289
34022_at	CXCL3	chemokine (C-X-C motif) ligand 3	4q21	-0.848105315004418	2.78848957136478	0.00486087484844627
35681_r_at	ZEB2	zinc finger E-box binding homeobox 2	2q22.3	-0.846640294164964	2.99067479989723	0.00469245327381573
32190_at	FADS2	fatty acid desaturase 2	11q12.2	-0.846236449314854	5.42270692425368	0.00113451496622626
41038_at	NCF2	neutrophil cytosolic factor 2	1q25	-0.84503808979936	2.97898791295619	0.00402566273248036
39046_at	H2AFV	H2A histone family, member V	7p13	-0.844534062339493	7.34540349789057	0.00368789786613226
1463_at	PTPN12	protein tyrosine phosphatase, non-receptor type 12	7q11.23	-0.834550467210619	7.48045990016647	0.00328432695221746
36581_at	GARS	glycyl-tRNA synthetase	7p15	-0.834373662805757	8.3169540854617	7.27931544102485e-05
38566_at	COL10A1	collagen, type X, alpha 1	6q21-q22	-0.83421703293588	3.16816568036781	0.00403071456721957
35291_at	BAG2	BCL2-associated athanogene 2	6p12.1-p11.2	-0.83196097814687	3.39185916066639	0.00168438922643751
31523_f_at	HIST1H2BE	histone cluster 1, H2be	6p21.3	-0.830526500892913	5.77587441931139	0.00483190316826538
2045_s_at	HCK	hemopoietic cell kinase	20q11-q12	-0.829267159416887	4.07247754583207	0.00281516683472843
40018_at	NUPL1	nucleoporin like 1	13q12.13	-0.82780962188544	3.49089790432296	0.00141778280979016
36069_at	SRGAP2	SLIT-ROBO Rho GTPase activating protein 2	1q32.1	-0.827237865138558	4.30489319505474	0.00185992827334291
37536_at	CD83	CD83 molecule	6p23	-0.823242856435229	4.04868896579912	0.00175650340557875
40051_at	TRAM2	translocation associated membrane protein 2	6p21.1-p12	-0.822915352836994	5.48526154504368	0.004106826300433
2062_at	IGFBP7	insulin-like growth factor binding protein 7	4q12	-0.819332303212413	9.17930577346223	0.00281516683472843
36958_at	ZYX	zyxin	7q32	-0.818525943415548	7.0677849311845	0.00510576199555932
39169_at	SEC61G	Sec61 gamma subunit	7p11.2	-0.818375494251047	9.37523762468907	0.000888622077576051
39319_at	LCP2	lymphocyte cytosolic protein 2 (SH2 domain containing leukocyte protein of 76kDa)	5q33.1-qter	-0.817087894056551	3.67248544668248	0.00356431255271281
37333_at	DNMT1	DNA (cytosine-5-)-methyltransferase 1	19p13.2	-0.80606180561854	5.83541535042879	0.000705148500640671
34782_at	JARID2	jumonji, AT rich interactive domain 2	6p24-p23	-0.800755045039972	4.94451281596591	0.00169701806761289
40407_at	KPNA2	karyopherin alpha 2 (RAG cohort 1, importin alpha 1)	17q24.2	-0.799167274556663	8.15564493934386	0.00137733104838573
947_at	MCM7	minichromosome maintenance complex component 7	7q21.3-q22.1	-0.796558433851482	7.82700947492959	0.00469880773516479
37171_at	KIF23	kinesin family member 23	15q23	-0.79646607205146	3.47982234077208	0.00358943047712767
32350_at	MALT1	mucosa associated lymphoid tissue lymphoma translocation gene 1	18q21	-0.79605116064826	3.33597775234917	0.00296001607476092
870_f_at	MT3	metallothionein 3	16q13	-0.794362306853975	5.71250639841605	0.003370446303667
38518_at	SCML2	sex comb on midleg-like 2 (Drosophila)	Xp22	-0.789370125924892	5.03986102559661	0.00159687852991665
40717_at	CTSL2	cathepsin L2	9q22.2	-0.787801941415527	2.7450348073967	0.0025407290396345
40742_at	HCK	hemopoietic cell kinase	20q11-q12	-0.7840725638448	6.22796981565057	0.00162995985719622
33255_at	NASP	nuclear autoantigenic sperm protein (histone-binding)	1p34.1	-0.783082359467828	8.7483511081764	0.0059132283387996
39092_at	H2AFV	H2A histone family, member V	7p13	-0.78239246967228	9.36975149631615	0.000274405661656295
39541_at	HEG1	HEG homolog 1 (zebrafish)	3q21.2	-0.781264582228381	4.76103786496015	0.00274890348119967
39253_s_at	RALA	v-ral simian leukemia viral oncogene homolog A (ras related)	7p15-p13	-0.781092436318422	6.29262431319107	0.00577478047361518
37584_at	FANCG	Fanconi anemia, complementation group G	9p13	-0.779525864802389	4.73002442516876	0.00468704497762336
31856_at	LRRC32	leucine rich repeat containing 32	11q13.5-q14	-0.778930036566178	3.32083551458073	0.00469075136557428
37238_s_at	PKMYT1	protein kinase, membrane associated tyrosine/threonine 1	16p13.3	-0.777568604053395	6.49905848137043	0.000529647631876875
35576_f_at	HIST1H2BL	histone cluster 1, H2bl	6p22.1	-0.776353068152539	6.45511722914053	0.00825942515438902
36582_g_at	GARS	glycyl-tRNA synthetase	7p15	-0.775887892150191	8.25187078640075	0.000451197879268338
32260_at	PEA15	phosphoprotein enriched in astrocytes 15	1q21.1	-0.773894298754446	7.97503733913094	0.000247260172504125
38132_at	CDC42EP1	CDC42 effector protein (Rho GTPase binding) 1	22q13.1	-0.773582330856954	5.61755842675407	0.00312633467480353
41717_at	FADS1	fatty acid desaturase 1	11q12.2-q13.1	-0.76863767961896	4.4285631230453	0.000247260172504125
34830_at	VOPP1	vesicular, overexpressed in cancer, prosurvival protein 1	7p11.2	-0.765813617490691	7.30546117960998	0.00807418050437253
37844_at	IL27RA	interleukin 27 receptor, alpha	19p13.11	-0.76541637398101	4.31364803727624	0.00980055012853198
39347_at	AP2S1	adaptor-related protein complex 2, sigma 1 subunit	19q13.2-q13.3	-0.761677609010114	8.33982885918947	0.000117918640349737
931_at	GPR183	G protein-coupled receptor 183	13q32.3	-0.756881687532894	2.98602112690384	0.003688386446898
32272_at	TUBA1B	tubulin, alpha 1b	12q13.12	-0.75552675486615	10.8225943302309	0.000132576641135356
39007_at	MMP2	matrix metallopeptidase 2 (gelatinase A, 72kDa gelatinase, 72kDa type IV collagenase)	16q13-q21	-0.755478286740607	5.1854653815636	0.00279292144827959
32441_at	CTPS	CTP synthase	1p34.1	-0.748632983602913	3.90256065047178	0.00878059667120458
32174_at	SLC9A3R1	solute carrier family 9 (sodium/hydrogen exchanger), member 3 regulator 1	17q25.1	-0.748435618161104	6.49568743018383	0.00419124878578155
39634_at	SLIT2	slit homolog 2 (Drosophila)	4p15.2	-0.747651019721093	2.99168832027788	0.00331518615904681
34403_at	MFGE8	milk fat globule-EGF factor 8 protein	15q25	-0.741341443560991	7.45816550026534	0.00376684648447188
35850_at	JMJD6	jumonji domain containing 6	17q25	-0.735986323213596	6.30839764905145	9.7194958146849e-05
34659_at	NUP155	nucleoporin 155kDa	5p13.1	-0.73335125935192	5.69320584954411	0.00633692445811519
38393_at	KIAA0247	KIAA0247	14q24.1	-0.732536386949723	7.29758369978737	0.000857741128953013
40848_g_at	MICAL2	microtubule associated monoxygenase, calponin and LIM domain containing 2	11p15.3	-0.732371964753481	7.62720358457066	0.00932403250755413
36336_s_at	SBNO2	strawberry notch homolog 2 (Drosophila)	19p13.3	-0.731814531752228	6.3331569863415	0.00469518141443243
1775_at	POLA2	polymerase (DNA directed), alpha 2 (70kD subunit)	11q13.1	-0.730913427119006	3.33589089727537	0.00905303762829734
1792_g_at	CDK2	cyclin-dependent kinase 2	12q13	-0.729793931060356	6.54297754387726	0.00980051267220154
33812_at	ADAM19	ADAM metallopeptidase domain 19	5q33.3	-0.72962756197872	6.07593329412206	0.000852181516050541
1612_s_at	JUND	jun D proto-oncogene	19p13.2	-0.727183822148456	10.7138418878746	0.000284737052605963
1877_g_at	RALA	v-ral simian leukemia viral oncogene homolog A (ras related)	7p15-p13	-0.719098816741217	6.35083557992772	0.0094266022524484
35851_g_at	JMJD6	jumonji domain containing 6	17q25	-0.715852489986565	3.96950556871990	0.00159695503395813
34663_at	FCGR2B	Fc fragment of IgG, low affinity IIb, receptor (CD32)	1q23	-0.715396642959179	2.87717655227500	0.00492379183800597
39045_at	ADIPOR2	adiponectin receptor 2	12p13.31	-0.713901310810885	7.16203837945187	0.000517727389288706
40520_g_at	PTPRC	protein tyrosine phosphatase, receptor type, C	1q31-q32	-0.712912752522575	3.78795800416989	0.00214925267171072
36489_at	PRPS1	phosphoribosyl pyrophosphate synthetase 1	Xq21.32-q24	-0.711940875436993	6.16844982309068	0.00480658735019527
241_g_at	SRM	spermidine synthase	1p36-p22	-0.71147269702676	7.91731891618994	0.00431372938111428
41483_s_at	JUND	jun D proto-oncogene	19p13.2	-0.707477256133133	10.6760979229717	0.000422527766638218
31902_at	DIO2	deiodinase, iodothyronine, type II	14q24.2-q24.3	-0.706002441125617	2.72391688105369	0.00966753754278333
38812_at	LAMB2	laminin, beta 2 (laminin S)	3p21	-0.692791598400507	6.17538599560837	0.00498600232907284
34803_at	USP12	ubiquitin specific peptidase 12	13q12.13	-0.692474408456635	6.47068409527055	0.00627534428941472
34753_at	VAMP7	vesicle-associated membrane protein 7	Xq28	-0.686763377711166	6.92438987296646	0.00511212251749386
36184_at	PLOD1	procollagen-lysine 1, 2-oxoglutarate 5-dioxygenase 1	1p36.22	-0.684831726311012	7.37521955377743	0.00344536681965262
39730_at	ABL1	c-abl oncogene 1, non-receptor tyrosine kinase	9q34.1	-0.680533314570645	7.27896301789865	0.00555697315573397
1993_s_at	BRCA1	breast cancer 1, early onset	17q21	-0.675183991784444	4.40391406784365	0.00218445211562343
36985_at	IDI1	isopentenyl-diphosphate delta isomerase 1	10p15.3	-0.673373533710873	7.87006267281873	0.00679250778504478
34217_at	KLF7	Kruppel-like factor 7 (ubiquitous)	2q32	-0.671404912420869	3.07883838382802	0.0090762496539719
39108_at	LSS	lanosterol synthase (2,3-oxidosqualene-lanosterol cyclase)	21q22.3	-0.665436149610566	5.16417514683516	0.0058735112430755
1506_at	IL2RG	interleukin 2 receptor, gamma	Xq13.1	-0.662502593620573	4.63517301626373	0.00523331313046527
36678_at	TAGLN2	transgelin 2	1q21-q25	-0.660762311843012	9.03354421389098	0.0055331453745775
40568_at	ATP6V1B2	ATPase, H+ transporting, lysosomal 56/58kDa, V1 subunit B2	8p21.3	-0.657535983208655	7.09158551845598	0.00132579860104995
41114_at	MAST2	microtubule associated serine/threonine kinase 2	1p34.1	-0.657265285464554	5.5191509536033	0.0098595769316192
37646_at	POLD3	polymerase (DNA-directed), delta 3, accessory subunit	11q14	-0.655536945167648	5.2685027345328	0.000224066616617108
38779_r_at	HDGF	hepatoma-derived growth factor	1q21-q23	-0.64702993122346	5.92192724098013	0.00772446448456075
651_at	RPA3	replication protein A3, 14kDa	7p22	-0.646851793821439	6.4656368391392	0.0083391079364288
33213_g_at	RRBP1	ribosome binding protein 1 homolog 180kDa (dog)	20p12	-0.629938292136527	7.90575986696716	0.00496077622111738
31944_at	TULP3	tubby like protein 3	12p13.3	-0.628627840894167	6.04916790518451	0.000155869627254366
1635_at	ABL1	c-abl oncogene 1, non-receptor tyrosine kinase	9q34.1	-0.627685983315305	7.27490447176264	0.009928295294835
39929_at	KIAA0922	KIAA0922	4q31.3	-0.625458776340648	4.29072940183513	0.00890188085341204
31524_f_at	HIST1H2BI	histone cluster 1, H2bi	6p21.3	-0.621361133896055	5.67125465525573	0.00758178155622329
570_at	RELB	v-rel reticuloendotheliosis viral oncogene homolog B	19q13.32	-0.617468231500016	4.18686438870851	0.00164916622781991
39080_at	KDELR2	KDEL (Lys-Asp-Glu-Leu) endoplasmic reticulum protein retention receptor 2	7p22.1	-0.617390720551242	8.66622867747844	0.0004121895322719
34235_at	GPR116	G protein-coupled receptor 116	6p12.3	-0.610656484499467	6.4184584355837	0.00588778353433105
38792_at	SMS	spermine synthase	Xp22.1	-0.610247175266846	5.28606293544277	0.00218445211562343

## Sheet: StranskyNatGen Invasive Down
ID	Symbol	Gene Title	Chromosome	logFC	AveExpr	adj.P.Val
32349_at	ANXA10	annexin A10	4q33	4.70907348983794	6.30215822645855	4.08389993311363e-09
32570_at	HPGD	hydroxyprostaglandin dehydrogenase 15-(NAD)	4q34-q35	3.98157174210875	7.82368209871404	8.55538578533807e-06
38178_at	HSD17B2	hydroxysteroid (17-beta) dehydrogenase 2	16q24.1-q24.2	3.72398949343059	6.7950505077102	3.87058686330685e-07
37322_s_at	HPGD	hydroxyprostaglandin dehydrogenase 15-(NAD)	4q34-q35	3.71843139776382	6.8498937531307	7.48277356646562e-06
36883_at	KRT13	keratin 13	17q12-q21.2	3.63517305692054	8.60557708353588	0.000664746121226438
38430_at	FABP4	fatty acid binding protein 4, adipocyte	8q21	3.56321174723546	6.76946049633558	8.10734957652622e-05
35194_at	GPX2	glutathione peroxidase 2 (gastrointestinal)	14q24.1	3.53353740327308	8.63565171941175	0.000117986434452953
32392_s_at				3.48620259774752	7.94755779788287	2.95549580548528e-05
38582_at	SPINK1	serine peptidase inhibitor, Kazal type 1	5q32	3.41443045272074	8.78813027725884	0.000299020893559143
37821_at	BCAS1	breast carcinoma amplified sequence 1	20q13.2	3.3487738691987	7.11043784842244	7.16599886481054e-06
31805_at	FGFR3	fibroblast growth factor receptor 3	4p16.3	3.25439592972465	8.41270452687928	4.25723577265255e-05
33241_at	MFAP3L	microfibrillar-associated protein 3-like	4q32.3	3.21296277446546	6.57283150767815	1.57050198945190e-06
34319_at	S100P	S100 calcium binding protein P	4p16	3.15608941540798	9.9267173468389	0.000115896710017536
35004_at	DHRS2	dehydrogenase/reductase (SDR family) member 2	14q11.2	3.05810516749281	9.7061854928016	0.00136657608397446
41294_at	KRT7	keratin 7	12q12-q13	3.02825743213107	10.6381917732042	0.00036892546595475
34256_at	ST3GAL5	ST3 beta-galactoside alpha-2,3-sialyltransferase 5	2p11.2	2.96586619660344	7.150247687493	1.15133417773274e-07
35345_at	HMGCS2	3-hydroxy-3-methylglutaryl-CoA synthase 2 (mitochondrial)	1p13-p12	2.89983680516078	9.08471440827762	0.00106797550730379
39249_at	AQP3	aquaporin 3 (Gill blood group)	9p13	2.89916598748253	8.8101409805532	3.99321971116368e-05
33792_at	PSCA	prostate stem cell antigen	8q24.2	2.89751474481071	9.75264261835111	0.00423188040660832
206_at	CTSE	cathepsin E	1q31	2.87255023924677	4.62591122746907	0.000335473549730825
936_s_at	D4S234E	DNA segment on chromosome 4 (unique) 234 expressed sequence	4p16.3	2.86111309985162	5.80463919291604	3.87058686330685e-07
271_s_at	CTSE	cathepsin E	1q31	2.82350810970801	6.2743012903907	0.000405510013612314
36355_at	IVL	involucrin	1q21	2.77010139012599	6.30818900971636	0.000193611372397138
38827_at	AGR2	anterior gradient homolog 2 (Xenopus laevis)	7p21.3	2.76553225287455	8.18733540363944	0.000315657154898376
39248_at	AQP3	aquaporin 3 (Gill blood group)	9p13	2.74440905437447	10.9479991311699	0.000499684245052465
32527_at	C10orf116	chromosome 10 open reading frame 116	10q23.2	2.73576765710341	10.4043070191534	0.000569762074335782
38457_at	TNNI2	troponin I type 2 (skeletal, fast)	11p15.5	2.71761627629548	5.04970566591041	0.000200862724039073
37426_at	TOX3	TOX high mobility group box family member 3	16q12.1	2.68700517422690	6.299391235913	2.29581998843919e-05
36284_at	LY6D	lymphocyte antigen 6 complex, locus D	8q24	2.62468788360953	6.91543129466923	0.00983352276976586
32805_at				2.58600642490905	9.7420454577167	0.00106502566174811
38411_at	SORL1	sortilin-related receptor, L(DLR class) A repeats-containing	11q23.2-q24.2	2.57407165247151	8.24763456001946	1.15719371521854e-05
36495_at	FBP1	fructose-1,6-bisphosphatase 1	9q22.3	2.54336821618427	8.55418159156537	0.000274419157044752
1882_g_at	MECOM	MDS1 and EVI1 complex locus	3q26	2.48414615697153	7.6605347888628	2.7634947445276e-05
37399_at	AKR1C3	aldo-keto reductase family 1, member C3 (3-alpha hydroxysteroid dehydrogenase, type II)	10p15-p14	2.47835610975859	8.67588170420634	0.000882414606012472
38261_at	ABCC3	ATP-binding cassette, sub-family C (CFTR/MRP), member 3	17q22	2.43211168431261	7.37274225717732	4.66262432520338e-05
41709_at	PPFIBP2	PTPRF interacting protein, binding protein 2 (liprin beta 2)	11p15.4	2.42805479164246	7.01341465852683	1.58126858076484e-05
39087_at	FXYD3	FXYD domain containing ion transport regulator 3	19q13.12	2.37951982580872	6.83791754284501	5.7985801408785e-06
37104_at	PPARG	peroxisome proliferator-activated receptor gamma	3p25	2.37257496388318	7.26021670873132	0.000252157172603800
31791_at	TP63	tumor protein p63	3q28	2.37209855824344	7.8666181217107	0.000977396233216493
38316_at	ALDH1L1	aldehyde dehydrogenase 1 family, member L1	3q21.3	2.31839530657850	5.70924378599767	5.81699785937124e-06
37141_at	FOXA1	forkhead box A1	14q12-q13	2.29065156790750	8.00633414952548	0.0017254695845629
41556_s_at	HS3ST1	heparan sulfate (glucosamine) 3-O-sulfotransferase 1	4p16	2.25501510679641	4.97863035621588	5.24823694106267e-06
41771_g_at	MAOA	monoamine oxidase A	Xp11.3	2.22973194511504	8.70349328359206	0.000315657154898376
862_at	SERPINB5	serpin peptidase inhibitor, clade B (ovalbumin), member 5	18q21.3	2.21894978327470	7.86238489280971	0.00218445211562343
39614_at	KIAA0802	KIAA0802	18p11.22	2.20032581042158	6.05915350667023	8.21511388317317e-06
1881_at	MECOM	MDS1 and EVI1 complex locus	3q26	2.18230671942223	7.15386793589767	1.88834949679218e-06
35099_at	APOL1	apolipoprotein L, 1	22q13.1	2.1510488712923	8.29103447558271	2.32299475910632e-05
37125_f_at	CYP3A5	cytochrome P450, family 3, subfamily A, polypeptide 5	7q21.1	2.13861719640474	5.21504331336811	0.000290666169317544
39366_at	PPP1R3C	protein phosphatase 1, regulatory (inhibitor) subunit 3C	10q23-q24	2.13301096849879	7.34154153151843	0.000147627496243692
41770_at	MAOA	monoamine oxidase A	Xp11.3	2.12846369300437	7.55456787222532	9.00123421200914e-05
37124_i_at	CYP3A5	cytochrome P450, family 3, subfamily A, polypeptide 5	7q21.1	2.11504386757909	6.34645212770697	0.000170228321000767
39930_at	EPHB6	EPH receptor B6	7q33-q35	2.09642485662599	5.88432868309433	0.000308779214384985
38717_at	METTL7A	methyltransferase like 7A	12q13.12	2.07784093586751	9.301900403694	0.000604664225084697
32163_f_at				2.05828751069349	4.24328880096567	8.58100795765036e-05
37323_r_at	HPGD	hydroxyprostaglandin dehydrogenase 15-(NAD)	4q34-q35	2.04643853520087	5.88694428935454	1.13500824502838e-05
501_g_at	CYP2J2	cytochrome P450, family 2, subfamily J, polypeptide 2	1p31.3-p31.2	2.0359091226526	6.30800215961988	7.61400219641829e-05
38160_at	LY75	lymphocyte antigen 75	2q24	2.02203635286575	5.9324737475142	7.94784765923903e-05
32140_at	SORL1	sortilin-related receptor, L(DLR class) A repeats-containing	11q23.2-q24.2	2.01829898328305	9.7942465791832	7.06685281309983e-05
41772_at	MAOA	monoamine oxidase A	Xp11.3	2.01656437192884	8.42128253060084	0.00103747393060569
40511_at	GATA3	GATA binding protein 3	10p15	2.01486532583841	8.78108473860307	0.00309742559932153
36555_at	SNCG	synuclein, gamma (breast cancer-specific protein 1)	10q23.2-q23.3	2.00753602227475	8.230170978396	0.00292807140721513
203_at	GATA2	GATA binding protein 2	3q21.3	1.99993221158321	5.94623832359308	0.000172904013858671
36619_r_at	ID1	inhibitor of DNA binding 1, dominant negative helix-loop-helix protein	20q11	1.99518447003683	5.86733149397817	7.94784765923903e-05
37194_at	GATA2	GATA binding protein 2	3q21.3	1.98307480771623	7.6093980750478	0.000267018372422014
40899_at	KRT19	keratin 19	17q21.2	1.97843624246458	12.0781824045241	0.00305243367907719
33559_at	PTK6	PTK6 protein tyrosine kinase 6	20q13.3	1.97680253976535	5.94022372563964	0.00031302777162726
41859_at	UST	uronyl-2-sulfotransferase	6q25.1	1.97164790348266	4.21036563038214	8.93043916833421e-07
37021_at	CTSH	cathepsin H	15q25.1	1.96911598008498	9.28168501678424	9.21284001048715e-05
35974_at	LRMP	lymphoid-restricted membrane protein	12p12.1	1.95423764334662	5.61015947957972	0.00136973662912773
36929_at	LAMB3	laminin, beta 3	1q32	1.93245070864986	7.53386796072395	0.000954325526741633
39974_at	ENTPD3	ectonucleoside triphosphate diphosphohydrolase 3	3p21.3	1.91513118534222	7.31309914223486	0.000726074995982263
36779_at	FABP6	fatty acid binding protein 6, ileal	5q33.3-q34	1.91403205727083	5.26814124704793	0.000159761205070968
1317_at	MST1R	macrophage stimulating 1 receptor (c-met-related tyrosine kinase)	3p21.3	1.89616174396022	5.80980098871465	0.000229721967170543
33130_at	HOXD1	homeobox D1	2q31.1	1.89589210114968	3.66957837068333	1.33834108106981e-05
35492_at	CYP4F12	cytochrome P450, family 4, subfamily F, polypeptide 12	19p13.1	1.88954511208040	6.38486591027902	5.53492095435053e-05
1898_at	TRIM29	tripartite motif-containing 29	11q22-q23	1.87847016192121	9.1501498277238	0.00238875112606717
34251_at	HOXB5	homeobox B5	17q21.3	1.85252709314880	5.00237169104201	8.48675088209174e-06
38087_s_at	S100A4	S100 calcium binding protein A4	1q21	1.85143725465333	8.52345645674047	0.00174276070451248
863_g_at	SERPINB5	serpin peptidase inhibitor, clade B (ovalbumin), member 5	18q21.3	1.85014767306957	7.60067085307102	0.00630622711120073
33895_at	SH3YL1	SH3 domain containing, Ysc84-like 1 (S. cerevisiae)	2p25.3	1.84928450020640	8.67360045772435	8.43163193871105e-05
1788_s_at	DUSP4	dual specificity phosphatase 4	8p12-p11	1.84741663023882	7.53388666425506	0.000644120924162245
39610_at	HOXB2	homeobox B2	17q21.32	1.84217554439025	5.6322942342154	0.00076777548660119
37401_g_at	TRAK1	trafficking protein, kinesin binding 1	3p22.1	1.83001627436298	5.66716794267411	8.58100795765036e-05
38127_at	SDC1	syndecan 1	2p24.1	1.82950496866294	10.4771789473907	0.00249446434840518
35454_at	PLCH2	phospholipase C, eta 2	1p36.32	1.82731373511089	6.35708515363102	9.78520968297607e-05
36618_g_at	ID1	inhibitor of DNA binding 1, dominant negative helix-loop-helix protein	20q11	1.81717905131638	10.1507344911709	0.000113224027107385
1955_s_at	SMAD6	SMAD family member 6	15q21-q22	1.80431460286909	4.0518785997951	6.40708530062819e-06
36634_at	BTG2	BTG family, member 2	1q32	1.79960234076876	9.19369320225132	0.000144564088827404
39382_at	TRIM2	tripartite motif-containing 2	4q31.3	1.79847477203647	7.77264751546594	7.94784765923903e-05
33446_at	ABAT	4-aminobutyrate aminotransferase	16p13.2	1.78273262085251	4.86864243578776	6.74347154583566e-05
38122_at	SLC23A2	solute carrier family 23 (nucleobase transporters), member 2	20p13	1.77770450580408	7.38459045665807	3.87058686330685e-07
36014_at	GPR126	G protein-coupled receptor 126	6q24.1	1.77719585221056	7.10722525900516	0.000932927354610568
41049_at	IRS1	insulin receptor substrate 1	2q36	1.77041057918515	7.76796940919865	0.000299020893559143
32800_at	RXRA	retinoid X receptor, alpha	9q34.3	1.76651442371862	8.68189213674997	1.09111902523452e-05
851_s_at	IRS1	insulin receptor substrate 1	2q36	1.76360530287895	6.87367405738443	0.00068934614495467
33766_at	VIPR1	vasoactive intestinal peptide receptor 1	3p22	1.76210446528923	4.65919618971194	0.000778420480885528
40155_at	ABLIM1	actin binding LIM protein 1	10q25	1.74096950037345	6.54704692660482	2.95549580548528e-05
307_at	ALOX5	arachidonate 5-lipoxygenase	10q11.2	1.73256059877664	7.94335473800167	0.000977387603500578
39549_at	NPAS2	neuronal PAS domain protein 2	2q11.2	1.72504896675123	6.02239355633961	4.71922427003958e-06
38229_at	CYP3A5	cytochrome P450, family 3, subfamily A, polypeptide 5	7q21.1	1.72417195524655	5.74019989471878	1.31833184146252e-05
1933_g_at	ABCC5	ATP-binding cassette, sub-family C (CFTR/MRP), member 5	3q27	1.70906794682600	7.44838213953827	2.90238128922276e-05
37043_at	ID3	inhibitor of DNA binding 3, dominant negative helix-loop-helix protein	1p36.13-p36.12	1.70863136541424	8.22065891033383	4.12077747847319e-05
35472_at	KCNJ15	potassium inwardly-rectifying channel, subfamily J, member 15	21q22.2	1.67366716727637	5.84582363799727	0.00109331155930656
1292_at	DUSP2	dual specificity phosphatase 2	2q11	1.66466335897442	5.06831486797322	0.000588211715487466
40782_at	DHRS3	dehydrogenase/reductase (SDR family) member 3	1p36.1	1.65225793433425	8.11237380439122	0.000206173796825927
40733_f_at	MSX2	msh homeobox 2	5q35.2	1.63662430473531	5.21632377121722	0.000109318391030232
35402_at	TNFRSF21	tumor necrosis factor receptor superfamily, member 21	6p21.1	1.61990150557286	8.51068741051138	0.000331524179286623
406_at	ITGB4	integrin, beta 4	17q25	1.61316458024502	9.29531356139429	0.00235313255601267
38678_at	SNRPE	small nuclear ribonucleoprotein polypeptide E	1q32	1.61042573515155	3.79139684294797	0.000113224027107385
36852_at	TUSC3	tumor suppressor candidate 3	8p22	1.60492216365290	7.35689919871032	0.00131034887990093
39339_at	TMEM63A	transmembrane protein 63A	1q42.12	1.60209454228759	6.52377533311376	8.55538578533807e-06
1932_at	ABCC5	ATP-binding cassette, sub-family C (CFTR/MRP), member 5	3q27	1.60179528270553	5.65457576013886	2.56613932390872e-05
1585_at	ERBB3	v-erb-b2 erythroblastic leukemia viral oncogene homolog 3 (avian)	12q13	1.59972878796322	8.76642563768381	0.00152888378308020
845_at	STAT6	signal transducer and activator of transcription 6, interleukin-4 induced	12q13	1.57197845479625	6.43927378610749	3.10658718845903e-05
32787_at	ERBB3	v-erb-b2 erythroblastic leukemia viral oncogene homolog 3 (avian)	12q13	1.57029145680696	8.65781884873495	0.00150423882956812
38151_at	VWA5A	von Willebrand factor A domain containing 5A	11q23	1.56875225784967	5.08998786538566	3.56884523513429e-05
41872_at	DFNA5	deafness, autosomal dominant 5	7p15	1.56482045428222	5.16752312599452	0.00163822970366329
38459_g_at	CYB5A	cytochrome b5 type A (microsomal)	18q23	1.55847847835923	8.3978625498867	0.000280330671958153
37331_g_at	ALDH4A1	aldehyde dehydrogenase 4 family, member A1	1p36	1.55550484600392	8.23634221189953	0.000441582822473131
38458_at	CYB5A	cytochrome b5 type A (microsomal)	18q23	1.55523390943445	8.93779330363058	0.000247260172504125
33634_at	ATP8B1	ATPase, aminophospholipid transporter, class I, type 8B, member 1	18q21-q22	1.55161545094873	4.3262696239935	3.80670833361919e-05
41568_at	ARSD	arylsulfatase D	Xp22.3	1.54623637816644	3.74277385981004	3.87058686330685e-07
38388_at	OAS1	2',5'-oligoadenylate synthetase 1, 40/46kDa	12q24.1	1.52438512193113	5.66063983402395	0.00231455490254766
32716_at	DGKA	diacylglycerol kinase, alpha 80kDa	12q13.3	1.52268664511131	7.22447462693736	5.22994710939096e-05
41428_at	ABCC5	ATP-binding cassette, sub-family C (CFTR/MRP), member 5	3q27	1.50908619806384	5.94587768734748	2.213823994644e-05
40837_at	TLE2	transducin-like enhancer of split 2 (E(sp1) homolog, Drosophila)	19p13.3	1.50531854417616	7.01397061091955	0.007667664971532
34198_at	PTPN13	protein tyrosine phosphatase, non-receptor type 13 (APO-1/CD95 (Fas)-associated phosphatase)	4q21.3	1.50426149775445	9.10538881354298	0.000247260172504125
33052_at	PLA2G10	phospholipase A2, group X	16p13.1-p12	1.50172189163412	3.99154553646365	2.21714250392227e-05
33411_g_at	ITGA6	integrin, alpha 6	2q31.1	1.49825893380986	5.627716570404	0.00458406849527919
39364_s_at	PPP1R3C	protein phosphatase 1, regulatory (inhibitor) subunit 3C	10q23-q24	1.49693205797264	4.21802854086083	0.000553543677718535
41585_at	SEL1L3	sel-1 suppressor of lin-12-like 3 (C. elegans)	4p15.2	1.49418248214296	6.55371223216009	5.93243573960241e-05
37604_at	HNMT	histamine N-methyltransferase	2q22.1	1.48526266398793	6.01129195644025	7.63118845520022e-05
881_at	ITGB6	integrin, beta 6	2q24.2	1.48383161183334	5.56780729045229	0.000255587333475666
820_at	MGST2	microsomal glutathione S-transferase 2	4q28.3	1.48132343915585	8.31096764543123	4.12077747847319e-05
41043_at	SOX15	SRY (sex determining region Y)-box 15	17p13	1.47259853404424	5.40465858101106	0.000780970934407645
40349_at	CBR4	carbonyl reductase 4	4q32.3	1.47031002711823	4.78725582046169	5.81699785937124e-06
38850_at				1.45324500666068	4.94314340830941	6.09733315634138e-07
40290_f_at	ST3GAL1	ST3 beta-galactoside alpha-2,3-sialyltransferase 1	8q24.22	1.45190154381041	6.68826023775713	8.64186816035606e-05
41362_at	ABCG1	ATP-binding cassette, sub-family G (WHITE), member 1	21q22.3	1.44938063027408	5.77259420238496	7.44780116135926e-05
38515_at	BMP7	bone morphogenetic protein 7	20q13	1.44214412071386	4.40210364855107	0.00147608439205752
1629_s_at	PTPN13	protein tyrosine phosphatase, non-receptor type 13 (APO-1/CD95 (Fas)-associated phosphatase)	4q21.3	1.43621857286742	6.94245140905247	0.000597971618885381
38294_at	HOXD4	homeobox D4	2q31.1	1.42990688590395	6.04432303836722	0.000443978822652649
40093_at	BCAM	basal cell adhesion molecule (Lutheran blood group)	19q13.2	1.42275134937909	7.27289111926518	0.000671785738219465
37805_at	SRPX2	sushi-repeat-containing protein, X-linked 2	Xq21.33-q23	1.42249634044331	5.99068925627107	0.000388608764520265
41683_i_at	BCKDHB	branched chain keto acid dehydrogenase E1, beta polypeptide	6q14.1	1.42008389007237	5.16542116912238	0.000125882725520949
33410_at	ITGA6	integrin, alpha 6	2q31.1	1.41885956246101	7.04073693971885	0.00368153146075675
33282_at	LAD1	ladinin 1	1q25.1-q32.3	1.41806325911599	8.83966621877438	0.00125391179189949
41120_at	AMT	aminomethyltransferase	3p21.2-p21.1	1.40981102889586	6.49998430054335	0.000170228321000767
2052_g_at	MGMT	O-6-methylguanine-DNA methyltransferase	10q26	1.40672444240835	5.44504163212326	6.40365704438078e-05
2089_s_at	ERBB3	v-erb-b2 erythroblastic leukemia viral oncogene homolog 3 (avian)	12q13	1.40383741624668	6.49060531584575	0.0021846564124496
1072_g_at	GATA2	GATA binding protein 2	3q21.3	1.40250027517255	4.56024087443005	0.000197975186195677
1723_g_at	ERBB3	v-erb-b2 erythroblastic leukemia viral oncogene homolog 3 (avian)	12q13	1.39246922905291	5.1549398566058	0.000143366703817477
37958_at	TMEM47	transmembrane protein 47	Xp11.4	1.38809883919627	7.22865843934888	0.00498600232907284
32730_at	TSPYL5	TSPY-like 5	8q22.1	1.38389027002579	5.73977678611779	0.00581552829244671
1327_s_at	MAP3K5	mitogen-activated protein kinase kinase kinase 5	6q22.33	1.38228563387412	7.32239111922073	0.000738332816287486
31508_at	TXNIP	thioredoxin interacting protein	1q21.1	1.38120203572954	10.4082811978655	1.64860690839344e-05
1709_g_at	MAPK10	mitogen-activated protein kinase 10	4q22.1-q23	1.37605094805863	6.0305698642407	0.00107920252828125
41257_at	CAST	calpastatin	5q15	1.37522950982622	7.5875994086242	0.00197969569105697
36231_at	PIK3IP1	phosphoinositide-3-kinase interacting protein 1	22q12.2	1.37383538002139	4.37973276305722	2.53649306477622e-05
38066_at	NQO1	NAD(P)H dehydrogenase, quinone 1	16q22.1	1.37274751601027	7.4448563695505	0.00480658735019527
1467_at	EPS8	epidermal growth factor receptor pathway substrate 8	12p12.3	1.37083500689188	8.23266970845107	0.000739878295963444
1897_at	TGFBR3	transforming growth factor, beta receptor III	1p33-p32	1.36735925990996	6.38518726278728	0.000813394897202549
660_at	CYP24A1	cytochrome P450, family 24, subfamily A, polypeptide 1	20q13	1.3658362924407	3.50329454450790	0.00113451496622626
32429_f_at	ZNF33B	zinc finger protein 33B	10q11.2	1.35753456136690	4.6194510146853	1.49761257265850e-05
1657_at	PTPRR	protein tyrosine phosphatase, receptor type, R	12q15	1.34867917328479	3.72707767090175	0.00723831622619954
1529_at	FRY	furry homolog (Drosophila)	13q13.1	1.34749298547337	5.57394890211525	0.000247260172504125
34955_at	ABCC4	ATP-binding cassette, sub-family C (CFTR/MRP), member 4	13q32	1.33201442918502	5.71789682179785	3.39402168911623e-05
38631_at	TNFAIP2	tumor necrosis factor, alpha-induced protein 2	14q32	1.33160081929234	9.57101799837563	0.00627013760917229
32285_g_at	TBX1	T-box 1	22q11.21	1.33041163708916	3.31114439424689	0.000238988602154876
33749_at	TP53TG1	TP53 target 1 (non-protein coding)	7q21.1	1.32284104973979	4.64373086131622	3.96387849641973e-06
34651_at	COMT	catechol-O-methyltransferase	22q11.21	1.31944106581343	8.64474043047243	8.5934960299652e-05
38944_at	SMAD3	SMAD family member 3	15q22.33	1.31599811997203	6.73146938843033	0.000811804857458098
873_at	HOXA5	homeobox A5	7p15.2	1.31552118803747	4.85722922821245	0.000283132490406856
34425_at	MR1	major histocompatibility complex, class I-related	1q25.3	1.30363129089386	5.22258948735614	2.42829522003690e-06
40445_at	ELF3	E74-like factor 3 (ets domain transcription factor, epithelial-specific )	1q32.2	1.30133877687343	7.17528768867485	0.00716921456257827
37210_at	INA	internexin neuronal intermediate filament protein, alpha	10q24.33	1.30129684282550	6.02481070132952	0.00909502773342096
41755_at	COBLL1	COBL-like 1	2q24.3	1.30006350734310	5.364613602341	6.31495589149683e-05
1530_g_at	FRY	furry homolog (Drosophila)	13q13.1	1.29679276627418	4.24260850438432	8.05004167114933e-05
1658_g_at	PTPRR	protein tyrosine phosphatase, receptor type, R	12q15	1.29335285860850	3.62300511717469	0.00489928140193528
41455_at	ARHGAP32	Rho GTPase activating protein 32	11q24.3	1.29201516784632	6.44735886309516	0.000125018341163032
872_i_at	IRS1	insulin receptor substrate 1	2q36	1.29062520326403	4.43069925287957	0.000294855947239403
36317_at	CORO2A	coronin, actin binding protein, 2A	9q22.3	1.28980291768571	5.95107193944194	5.22994710939096e-05
37926_at	KLF5	Kruppel-like factor 5 (intestinal)	13q22.1	1.28260011450243	9.27184405485743	0.00131779386509965
1433_g_at	SMAD3	SMAD family member 3	15q22.33	1.27781246345917	7.13087866864748	0.000771503718505955
34162_at	RBPMS	RNA binding protein with multiple splicing	8p12	1.27651077077407	8.07496689956991	0.00429062852448982
444_g_at	HOXD4	homeobox D4	2q31.1	1.26908834884711	4.73963933013998	0.00218770219278175
33620_at	HOXB3	homeobox B3	17q21.3	1.26640741696466	4.53306229843624	1.47308660101471e-05
36680_at				1.26308373616938	4.12056526143709	0.000644276083601324
39324_at	PGAP1	post-GPI attachment to proteins 1	2q33.1	1.26268350808685	5.05594395558777	0.00914269679240194
41266_at	ITGA6	integrin, alpha 6	2q31.1	1.26048760137067	9.02018963857549	0.00318331615541959
33355_at	PBX1	pre-B-cell leukemia homeobox 1	1q23	1.25781578440851	6.25988853749218	0.00326124488494065
40454_at	FAT1	FAT tumor suppressor homolog 1 (Drosophila)	4q35	1.24602490254927	10.2135649216993	6.93017704316318e-05
39023_at	IDH1	isocitrate dehydrogenase 1 (NADP+), soluble	2q33.3	1.24291061422457	9.86896760505549	0.00136568189260643
1920_s_at	CCNG1	cyclin G1	5q32-q34	1.23707323310657	6.04006569140565	0.000837219515452916
37934_at	TMEM30B	transmembrane protein 30B	14q23.1	1.23302836636855	6.59694568977087	0.000281333905284446
39283_at	SHROOM2	shroom family member 2	Xp22.3	1.22813378400323	4.43386845280313	2.99875054397309e-06
34427_g_at	MR1	major histocompatibility complex, class I-related	1q25.3	1.22794466175835	6.18058640453059	8.55538578533807e-06
36965_at	ANK3	ankyrin 3, node of Ranvier (ankyrin G)	10q21	1.22442344042421	7.39247910507974	0.00460240500242030
35666_at	SEMA3F	sema domain, immunoglobulin domain (Ig), short basic domain, secreted, (semaphorin) 3F	3p21.3	1.21549682423342	8.95163239869799	0.000658292093359674
39356_at	NEDD4L	neural precursor cell expressed, developmentally down-regulated 4-like	18q21	1.2146231481740	5.04577869663024	0.00229509259363034
35266_at	BLCAP	bladder cancer associated protein	20q11.23	1.2136231076359	8.93151294145948	8.58100795765036e-05
37330_at	ALDH4A1	aldehyde dehydrogenase 4 family, member A1	1p36	1.21053195450239	6.72022706403541	0.00152888378308020
40330_at	PLCE1	phospholipase C, epsilon 1	10q23	1.21040086170051	6.05999045763381	0.00675583784751707
35369_at	DTX4	deltex homolog 4 (Drosophila)	11q12.1	1.21011184094201	7.869476363737	8.50577832689644e-05
885_g_at	ITGA3	integrin, alpha 3 (antigen CD49C, alpha 3 subunit of VLA-3 receptor)	17q21.33	1.20405361777370	7.36879746695665	0.00882615262970758
500_at	CYP2J2	cytochrome P450, family 2, subfamily J, polypeptide 2	1p31.3-p31.2	1.20389586488584	4.21119238271805	0.000391471064348683
32084_at	SLC22A5	solute carrier family 22 (organic cation/carnitine transporter), member 5	5q31	1.20218579637331	5.22823428501856	2.29038662483489e-05
40016_g_at	MAST4	microtubule associated serine/threonine kinase family member 4	5q12.3	1.20098495741396	8.41335076685514	0.00712716495673813
31307_at				1.19973897040339	3.21947767652331	0.000127406426382695
36617_at	ID1	inhibitor of DNA binding 1, dominant negative helix-loop-helix protein	20q11	1.19691884083833	11.0441650337628	0.0007023830330427
34300_at	PATZ1	POZ (BTB) and AT hook containing zinc finger 1	22q12.2	1.19539490039154	5.66288132312014	7.63118845520022e-05
37755_at	BTBD3	BTB (POZ) domain containing 3	20p12.2	1.19284415280858	6.32001905894779	0.00552433051364001
33774_at	CASP8	caspase 8, apoptosis-related cysteine peptidase	2q33-q34	1.19241811664344	6.78673810227648	0.00108175738442841
37123_at	VILL	villin-like	3p21.3	1.19185932483484	5.71282800983684	0.00458485209832345
38242_at	BLNK	B-cell linker	10q23.2-q23.33	1.18512477775503	4.05977629824799	0.000394519456212668
38799_at	AP1G2	adaptor-related protein complex 1, gamma 2 subunit	14q11.2	1.18475418462006	7.15745794328161	0.00100838568130423
502_s_at	HOXA1	homeobox A1	7p15.3	1.18321054106147	3.53163151865373	3.78895705851051e-05
38317_at	TCEAL1	transcription elongation factor A (SII)-like 1	Xq22.1	1.18291465793502	6.35607205377867	0.000162560136841186
34840_at	SERINC5	serine incorporator 5	5q14.1	1.18271688071037	7.62175440993672	0.00576024978693271
384_at	PSMB10	proteasome (prosome, macropain) subunit, beta type, 10	16q22.1	1.17848285700680	6.03176705566023	0.00289082111843117
41682_s_at	BCKDHB	branched chain keto acid dehydrogenase E1, beta polypeptide	6q14.1	1.1755227402254	4.46984158428123	9.21284001048715e-05
35261_at	GMFG	glia maturation factor, gamma	19q13.2	1.17396104219847	5.94697794991509	0.000932927354610568
2082_s_at	CDH1	cadherin 1, type 1, E-cadherin (epithelial)	16q22.1	1.16734697377582	5.37416099543196	0.000742221792631749
35216_at	ME3	malic enzyme 3, NADP(+)-dependent, mitochondrial	11cen-q22.3	1.16194455781149	4.68743867142095	0.000622380402375224
35389_s_at	ABCA6	ATP-binding cassette, sub-family A (ABC1), member 6	17q24.3	1.16179093780134	2.92663205295506	0.00515284359265997
36851_g_at	TUSC3	tumor suppressor candidate 3	8p22	1.14907824753318	8.11403810023641	0.00425794670955602
41715_at	PIK3C2B	phosphoinositide-3-kinase, class 2, beta polypeptide	1q32	1.14673169415664	7.7300293605665	0.0019623134443028
38798_s_at	AP1G2	adaptor-related protein complex 1, gamma 2 subunit	14q11.2	1.14317739106449	9.1901949692108	0.000111294145625439
36916_at	ST3GAL4	ST3 beta-galactoside alpha-2,3-sialyltransferase 4	11q24.2	1.14019190416433	6.80049113777017	0.00046608346063765
38839_at	PFN2	profilin 2	3q25.1	1.13924368355736	9.32998989075858	0.000499369955084089
41790_at	ALDH5A1	aldehyde dehydrogenase 5 family, member A1	6p22	1.13694758807460	6.92621882220154	0.00976139344759542
36894_at	CBX7	chromobox homolog 7	22q13.1	1.13071926783401	6.465543240065	0.00232915875027962
34798_at	BAG1	BCL2-associated athanogene	9p12	1.12857049670513	7.16098959736051	0.000370602614908396
1950_s_at	SMAD3	SMAD family member 3	15q22.33	1.1257211464766	5.42959751550315	0.000211515665515895
34678_at	MYOF	myoferlin	10q24	1.12446484550887	9.1322705995344	0.0065736941080517
362_at	PRKCZ	protein kinase C, zeta	1p36.33-p36.2	1.12237818828258	4.87379016913196	1.09111902523452e-05
38840_s_at	PFN2	profilin 2	3q25.1	1.12152238955726	8.82062382674914	0.000768475912470092
1454_at	SMAD3	SMAD family member 3	15q22.33	1.11566440568557	6.72713737532325	0.00229509259363034
41106_at	KCNN4	potassium intermediate/small conductance calcium-activated channel, subfamily N, member 4	19q13.2	1.11477516895856	6.43530612548359	0.00375879576623668
1708_at	MAPK10	mitogen-activated protein kinase 10	4q22.1-q23	1.11144255625223	4.32592927242577	0.0007386218493306
39077_at	NCRNA00188	non-protein coding RNA 188	17p11.2	1.11119527524698	7.4670459021168	1.35559554352714e-05
37619_at	METAP1	methionyl aminopeptidase 1	4q23	1.11076325856667	8.94999653312796	8.93043916833421e-07
41814_at	FUCA1	fucosidase, alpha-L- 1, tissue	1p34	1.11058891426402	7.8952615344042	0.00155637553997829
35958_at	GTF2IRD2	GTF2I repeat domain containing 2	7q11.23	1.10729598977076	5.0236554432677	0.000166302945486064
2033_s_at	WEE1	WEE1 homolog (S. pombe)	11p15.3-p15.1	1.10178989583464	5.84088367443206	0.000918195057993509
35442_at	TMEM63A	transmembrane protein 63A	1q42.12	1.10145178244632	6.70072105687141	0.000260554743951530
38041_at	GALNT1	UDP-N-acetyl-alpha-D-galactosamine:polypeptide N-acetylgalactosaminyltransferase 1 (GalNAc-T1)	18q12.1	1.09478938655446	8.15096868026966	0.00197969569105697
39365_i_at	PPP1R3C	protein phosphatase 1, regulatory (inhibitor) subunit 3C	10q23-q24	1.09478258196899	3.04383929600856	0.000744840275456882
37618_at	HOXB7	homeobox B7	17q21.3	1.09465582593601	6.1670171455002	9.631467520341e-05
39369_at	MAN2B2	mannosidase, alpha, class 2B, member 2	4p16.1	1.09323234525917	6.58996222171857	0.00100311728397472
1930_at	ABCC3	ATP-binding cassette, sub-family C (CFTR/MRP), member 3	17q22	1.08966659232083	5.79883298951305	0.000450637580820108
35408_i_at	ZNF44	zinc finger protein 44	19p13.2	1.08533685901775	6.87655206084923	0.000160338654167153
38156_at	MDFI	MyoD family inhibitor	6p21	1.08405853939402	5.65696052277447	8.50577832689644e-05
38247_at	F2RL1	coagulation factor II (thrombin) receptor-like 1	5q13	1.08369555138557	4.83942980007096	0.00625234202475051
33385_g_at	CAST	calpastatin	5q15	1.08249961809095	7.63510349536186	0.0077818618214755
34696_at	HIBCH	3-hydroxyisobutyryl-CoA hydrolase	2q32.2	1.08150469294495	4.04525717591571	0.000197022246297751
39055_at	SRI	sorcin	7q21.1	1.07817314088886	7.08966641661996	0.00143075420049250
38504_at	CAPN5	calpain 5	11q14	1.07725351494304	3.91268274921972	0.00450186512209219
41219_at	USP34	ubiquitin specific peptidase 34	2p15	1.07592738385023	4.64497383464423	0.00280600625460588
35794_at	PSD3	pleckstrin and Sec7 domain containing 3	8p21.3	1.07570734422118	5.32532947978779	0.00721407420622714
35309_at	ST14	suppression of tumorigenicity 14 (colon carcinoma)	11q24-q25	1.07557334870802	6.99243541775913	0.00772446448456075
33658_at	ZNF124	zinc finger protein 124	1q44	1.07469923195540	4.20776736515158	0.00211565772969035
32932_at				1.07332982393163	3.25407582857503	0.00425794670955602
36221_at	ACYP2	acylphosphatase 2, muscle type	2p16.2	1.07303769909151	4.34930311716442	7.1165051389086e-06
35267_g_at	BLCAP	bladder cancer associated protein	20q11.23	1.07008102163239	9.56001048888934	0.000169962240718822
41215_s_at				1.0646807967854	9.22628570421102	0.00725972952550516
36637_at	ANXA11	annexin A11	10q23	1.05713947159607	7.8342810528655	0.00125391179189949
35341_at	TRIM38	tripartite motif-containing 38	6p21.3	1.05667859138619	6.41664052999085	0.000841098223593959
41610_at	LAMA5	laminin, alpha 5	20q13.2-q13.3	1.05610031595085	7.86999837576997	0.00125391179189949
32250_at	CFH	complement factor H	1q32	1.05350363480289	6.54551611597413	0.00913952064370024
38669_at	SLK	STE20-like kinase	10q24.33	1.04896211506979	5.8960530835204	0.000247260172504125
40472_at	LPCAT4	lysophosphatidylcholine acyltransferase 4	15q14	1.04647766519324	8.02831280478922	0.00114655446067120
180_at	MBOAT7	membrane bound O-acyltransferase domain containing 7	19q13.4	1.04528138234617	7.86048373649708	0.00219967422365599
1276_g_at	RBPMS	RNA binding protein with multiple splicing	8p12	1.04245079535277	7.17573456882618	0.00622856610716242
36937_s_at	PDLIM1	PDZ and LIM domain 1	10q23.1	1.04175911130422	9.5455205719269	0.00414806687828488
40920_at	CDC14B	CDC14 cell division cycle 14 homolog B (S. cerevisiae)	9q22.3	1.03067164558753	5.20726947540264	0.000833745329737277
39424_at	TNFRSF14	tumor necrosis factor receptor superfamily, member 14 (herpesvirus entry mediator)	1p36.32	1.02927458335208	5.12403305990918	0.000191456927334622
37902_at	CRYZ	crystallin, zeta (quinone reductase)	1p31-p22	1.02777340864612	7.75331061923359	0.00465097598297719
34163_g_at	RBPMS	RNA binding protein with multiple splicing	8p12	1.02299318499967	6.79700668109232	0.00895780841526526
34352_at	PCBD1	pterin-4 alpha-carbinolamine dehydratase/dimerization cofactor of hepatocyte nuclear factor 1 alpha	10q22	1.01992442319164	8.02343287016943	0.000247260172504125
31343_at	IL1RN	interleukin 1 receptor antagonist	2q14.2	1.01760321157560	3.17270184080633	0.00244037852225148
512_at	NR1H3	nuclear receptor subfamily 1, group H, member 3	11p11.2	1.01356758641529	4.48447608144987	0.000346781170732447
34339_at	CYB5B	cytochrome b5 type B (outer mitochondrial membrane)	16q22.1	1.00766189655255	7.30299573772447	1.33326366132367e-05
39799_at	FABP5	fatty acid binding protein 5 (psoriasis-associated)	8q21.13	1.00754405325629	6.89057387777283	0.00993947868487453
33253_at	TRIM14	tripartite motif-containing 14	9q22.33	1.00748267769860	6.76998051968932	0.004764438149114
1913_at	CCNG2	cyclin G2	4q21.1	1.00567321092836	7.5281549604459	0.0097290799213423
36655_at	TJP2	tight junction protein 2 (zona occludens 2)	9q13-q21	0.995916572586466	6.5327866225799	0.00180656478198155
36083_at	TSPAN31	tetraspanin 31	12q13.3	0.992581111223669	7.10270783647864	2.21714250392227e-05
39236_s_at	FAAH	fatty acid amide hydrolase	1p35-p34	0.98983351502611	5.46829043382342	0.000994847851503101
38693_at	ATP5L	ATP synthase, H+ transporting, mitochondrial Fo complex, subunit G	11q23.3	0.984527072644483	5.57850493428566	0.000151035417639567
34046_at	SH3BP1	SH3-domain binding protein 1	22q13.1	0.981588706960991	6.95048670969088	0.003545301955824
40762_g_at	SLC16A5	solute carrier family 16, member 5 (monocarboxylic acid transporter 6)	17q25.1	0.977328215734675	6.49175664005486	0.00696118498140796
33783_at	PLXNB1	plexin B1	3p21.31	0.976868286349148	7.46742030216967	0.00235249086413799
35588_at				0.974451217821343	4.16761078557335	0.000193611372397138
35198_at	TMEM159	transmembrane protein 159	16p12	0.969245160977478	6.64163380180086	0.0024291028379907
31932_f_at	BTF3	basic transcription factor 3	5q13.2	0.968125309381996	10.3863781790200	7.22309073865564e-07
656_at	INPP1	inositol polyphosphate-1-phosphatase	2q32	0.967467107795955	7.26640007843079	0.000921517277797311
39252_at	SUCLG2	succinate-CoA ligase, GDP-forming, beta subunit	3p14.1	0.967100718636173	4.93483441032094	0.000699910694888062
35789_at	TRAK1	trafficking protein, kinesin binding 1	3p22.1	0.96322078095841	8.72813175940287	0.0028264841670294
32681_at	SLC9A1	solute carrier family 9 (sodium/hydrogen exchanger), member 1	1p36.1-p35	0.962353959680197	6.65724637985758	0.000630187497697701
32038_s_at	SRSF8	serine/arginine-rich splicing factor 8	11q22	0.961737304598754	6.28775809943474	2.03675071589508e-05
1832_at	MCC	mutated in colorectal cancers	5q21	0.961541653807263	5.40223828116324	0.000169408452821328
41784_at	SFRS18	splicing factor, arginine/serine-rich 18	6q16.3	0.960964761758702	6.07760407666092	0.00507054543474815
32919_at	AMIGO2	adhesion molecule with Ig-like domain 2	12q13.11	0.956803282864828	6.12973242955232	0.00776308983402916
34391_at	IGBP1	immunoglobulin (CD79A) binding protein 1	Xq13.1-q13.3	0.9526458937239	7.99428278658442	1.59313318826156e-06
35329_at	CYB5R1	cytochrome b5 reductase 1	1p36.13-q41	0.952245934468689	8.1304977877096	0.00214803037896146
40654_at	PEX7	peroxisomal biogenesis factor 7	6q23.3	0.949601074686398	4.69363661797315	0.00076699462605604
34771_at	PPAP2C	phosphatidic acid phosphatase type 2C	19p13	0.94924967910495	6.40653674317409	0.00941084897627185
1843_at	TRIM27	tripartite motif-containing 27	6p22	0.948837988660845	6.24229093433446	0.000803127145403809
36909_at	WEE1	WEE1 homolog (S. pombe)	11p15.3-p15.1	0.944869005649436	7.59180816141043	0.00940619481062763
35371_at	LRBA	LPS-responsive vesicle trafficking, beach and anchor containing	4q31.3	0.943630543375061	6.90224864874289	0.0026207861944257
621_at	RAB4A	RAB4A, member RAS oncogene family	1q42-q43	0.939965687450409	4.76094920336488	0.00194455263966328
35769_at	GPR56	G protein-coupled receptor 56	16q13	0.93977016926113	8.981061017343	0.000283029909957147
41856_at	UNC5B	unc-5 homolog B (C. elegans)	10q22.1	0.937355888197857	4.38893435798356	0.000193607724506276
37486_f_at	MEIS3P1	Meis homeobox 3 pseudogene 1	17p12	0.937319174568699	6.81394317169149	0.000129750552181855
32046_at	PRKCD	protein kinase C, delta	3p21.31	0.937259070062279	7.20968311182901	0.00435935643568377
40764_at	GOT2	glutamic-oxaloacetic transaminase 2, mitochondrial (aspartate aminotransferase 2)	16q21	0.934942185661765	9.90174667671552	1.66221722275701e-05
34986_at	MPZL2	myelin protein zero-like 2	11q24	0.93321453358981	3.9516291999257	0.00358943047712767
36814_at	KIAA1109	KIAA1109	4q27	0.932104235239926	8.05238181369097	0.00171754532847561
38142_at	ZNF211	zinc finger protein 211	19q13.4	0.93186949914777	5.32526428653298	0.00159877891495376
31849_at	KIAA0564	KIAA0564	13q14.11	0.9195037998579	5.57809558846518	0.00058493716046549
32181_at	FLOT2	flotillin 2	17q11-q12	0.919062976346379	6.13305207540009	0.000210169202848161
38022_s_at	PLEC	plectin	8q24	0.905706297005764	5.73933280792225	0.00403071456721957
36057_at	ARMCX2	armadillo repeat containing, X-linked 2	Xq21.33-q22.2	0.904830245688433	4.71909026301931	0.00496110750405963
35175_f_at				0.904636963901222	10.6812780451231	1.47308660101471e-05
41443_at	PSD4	pleckstrin and Sec7 domain containing 4	2q13	0.904416290706895	5.07500413332368	0.00138892797412714
324_f_at	BTF3	basic transcription factor 3	5q13.2	0.901853784003409	10.2728629239371	6.22918224074285e-07
32595_at	GRSF1	G-rich RNA sequence binding factor 1	4q13	0.898569903419802	7.01237820305793	3.97425259999431e-05
41328_s_at	EML2	echinoderm microtubule associated protein like 2	19q13.32	0.89762519326552	6.64563793135740	0.00983352276976586
1085_s_at	PLCG2	phospholipase C, gamma 2 (phosphatidylinositol-specific)	16q24.1	0.896034847389897	6.63588423181695	0.00616069472487264
35164_at	WFS1	Wolfram syndrome 1 (wolframin)	4p16	0.895749028638733	6.35338802880906	0.00508860769245943
738_at	NT5C2	5'-nucleotidase, cytosolic II	10q24.32	0.893943438513115	7.55902304758146	0.00104102292063436
36058_at	ASCC2	activating signal cointegrator 1 complex subunit 2	22q12.1	0.8917213716691	6.93539491824534	0.00195495739602782
31869_at	SWAP70	SWAP switching B-cell complex 70kDa subunit	11p15	0.889143800057912	5.28882716888803	0.00110721929310901
36091_at	SKAP2	src kinase associated phosphoprotein 2	7p15.2	0.888521283331876	8.0059897297173	0.00669388692238284
37707_i_at	ADH5	alcohol dehydrogenase 5 (class III), chi polypeptide	4q23	0.887312165743232	6.93814740524079	0.00109267622893266
36358_at	RPL9	ribosomal protein L9	4p13	0.88551325389811	11.9041879128474	0.000172766476803497
40143_at	FAM53B	family with sequence similarity 53, member B	10q26.13	0.883209328799425	4.9447958357642	0.000191802344182874
1137_at	SLC20A2	solute carrier family 20 (phosphate transporter), member 2	8p12-p11	0.883186758171449	5.28932349845461	0.00501035799134309
38441_s_at	CD46	CD46 molecule, complement regulatory protein	1q32	0.882772636831866	10.5562491573868	0.00388916071404149
36899_at	SATB1	SATB homeobox 1	3p23	0.877586433427687	8.71748920159004	0.00918256733155213
1974_s_at	TP53	tumor protein p53	17p13.1	0.876786902005681	4.71907577927383	0.000664705999824996
33264_at	ENOSF1	enolase superfamily member 1	18p11.32	0.876356718896211	5.40075581164198	0.000838925417797739
1294_at	UBA7	ubiquitin-like modifier activating enzyme 7	3p21	0.876140599663326	5.15058055256597	0.000557905255548438
34712_at	DNMBP	dynamin binding protein	10q24.2	0.875548277586923	5.95242852485385	0.00410466430866562
39751_at	ZDHHC3	zinc finger, DHHC-type containing 3	3p21.31	0.870089918355283	7.34679060279877	0.00111311644983826
39864_at	CIRBP	cold inducible RNA binding protein	19p13.3	0.868817846488298	9.8261823448402	0.00153260801540072
41179_at	RNF44	ring finger protein 44	5q35.2	0.866816692814176	8.59194437947345	0.000299020893559143
181_g_at	MBOAT7	membrane bound O-acyltransferase domain containing 7	19q13.4	0.863686638319667	8.80793400141145	0.00612158931913418
34609_g_at	GNB2L1	guanine nucleotide binding protein (G protein), beta polypeptide 2-like 1	5q35.3	0.862315363731764	11.9177910033461	8.21511388317317e-06
39626_s_at				0.862136336785785	4.88272292909619	0.000590176360523614
370_at	STK38	serine/threonine kinase 38	6p21	0.856002649527135	5.49139883893376	0.00386229766961137
37900_at	PEX11B	peroxisomal biogenesis factor 11 beta	1q21.1	0.855834684168625	7.41366999288467	5.5965425038129e-05
33819_at	LDHB	lactate dehydrogenase B	12p12.2-p12.1	0.853988445639596	11.3617689384777	0.000126730573457067
630_at	DCTD	dCMP deaminase	4q35.1	0.853120437637283	6.81902612537186	1.59313318826156e-06
32725_at	BID	BH3 interacting domain death agonist	22q11.1	0.85163175097888	3.8450721841819	0.00621948540727519
41222_at	STAT6	signal transducer and activator of transcription 6, interleukin-4 induced	12q13	0.851314578072281	8.3139983632566	0.0092440819889385
40761_at	SLC16A5	solute carrier family 16, member 5 (monocarboxylic acid transporter 6)	17q25.1	0.849132597543025	5.93749820535783	0.00461315876172405
32055_g_at	CCNT2	cyclin T2	2q21.3	0.848798628634295	5.46219893025156	0.000699910694888062
36624_at	IMPDH2	IMP (inosine 5'-monophosphate) dehydrogenase 2	3p21.2	0.847401244711872	9.5504549236450	0.000532333835414371
37713_at	ACY1	aminoacylase 1	3p21.1	0.847032268162681	6.99079474915416	0.00627013760917229
41381_at	CHD9	chromodomain helicase DNA binding protein 9	16q12.2	0.846680308138582	5.08292977868277	0.00993503282709183
1208_at	PTK6	PTK6 protein tyrosine kinase 6	20q13.3	0.846672351669434	5.23168762559132	0.00198385129048419
40521_at	RGL2	ral guanine nucleotide dissociation stimulator-like 2	6p21.3	0.843814196264061	7.54836904454973	0.00075577398366282
35188_at	FARP2	FERM, RhoGEF and pleckstrin domain protein 2	2q37.3	0.84347576104345	5.51165778222546	0.00277016485702264
38075_at	SYPL1	synaptophysin-like 1	7q22.3	0.839657490483507	10.4225292210491	0.00128651030926187
1348_s_at	PCCA	propionyl CoA carboxylase, alpha polypeptide	13q32	0.839607247558947	5.41636359402741	0.00257024667108834
1810_s_at	PRKCD	protein kinase C, delta	3p21.31	0.838627667298428	6.51456345970558	0.0035733114050487
36786_at	RPL10A	ribosomal protein L10a	6p21.31	0.838613812066924	10.6214681146590	2.95549580548528e-05
41310_f_at	NR2F6	nuclear receptor subfamily 2, group F, member 6	19p13.1	0.835523809469237	6.36702087634077	0.00205795392274448
37400_at				0.833335334632759	4.64277714055594	0.00225979215917982
36262_at	GNS	glucosamine (N-acetyl)-6-sulfatase	12q14	0.831532415848446	6.22728970080235	0.00726818696011101
41320_s_at	LRRFIP1	leucine rich repeat (in FLII) interacting protein 1	2q37.3	0.829358886022824	8.33622837292152	0.00833865322361599
40096_at	ATP5A1	ATP synthase, H+ transporting, mitochondrial F1 complex, alpha subunit 1, cardiac muscle	18q21	0.81941874873926	9.71754326677324	0.000266343843651464
35936_g_at				0.8179244874694	6.51214290788285	0.00492058958109977
34967_at	RRN3P1	RNA polymerase I transcription factor homolog (S. cerevisiae) pseudogene 1	16p12.2	0.81730198233101	4.66868410132728	0.00134581091018414
794_at	PTPN6	protein tyrosine phosphatase, non-receptor type 6	12p13	0.815899601942766	5.34626972246038	0.000149389700542309
38072_at	C1orf63	chromosome 1 open reading frame 63	1p36.13-p35.1	0.815770039590644	8.85726600256863	0.00245400902919861
1007_s_at	DDR1	discoidin domain receptor tyrosine kinase 1	6p21.3	0.815117252274405	9.05776026843903	0.000277257713410895
32317_s_at				0.814183330837628	7.69860965447911	0.0024291028379907
36660_at	RAB11A	RAB11A, member RAS oncogene family	15q22.31	0.811935727445848	8.75339849072126	0.00148659072479875
824_at	GSTO1	glutathione S-transferase omega 1	10q25.1	0.811060892725872	8.14465780009378	0.00151713957077280
41337_at	AES	amino-terminal enhancer of split	19p13.3	0.81053659081927	9.64967092392506	0.00126239370875969
32083_at	GPR137B	G protein-coupled receptor 137B	1q42-q43	0.809695396592278	4.2839164099688	0.00226404241369794
35719_at	PHLPP1	PH domain and leucine rich repeat protein phosphatase 1	18q21.33	0.808616626500972	6.50641195165764	0.00138401758692439
40343_at	FAM36A	family with sequence similarity 36, member A	1q44	0.808122343306012	5.06394625061196	0.000962166517292632
33657_at	RPL34	ribosomal protein L34	4q25	0.80467986848983	12.3471328249859	5.40025735162199e-05
39214_at	PLXNB3	plexin B3	Xq28	0.80296250746551	4.53343641024482	9.00123421200914e-05
39110_at	EIF4B	eukaryotic translation initiation factor 4B	12q13.13	0.80190345695058	8.97966704436395	0.00052022721999773
1218_at	NR2F6	nuclear receptor subfamily 2, group F, member 6	19p13.1	0.801509479231696	7.65541266195012	0.00198385129048419
35435_s_at	HADH	hydroxyacyl-CoA dehydrogenase	4q22-q26	0.80130646825001	6.66781036666851	0.0098577500164035
40711_at	YTHDC1	YTH domain containing 1	4q13.2	0.79829996426828	5.5928891638671	0.000514699337651436
31691_g_at	GLUD1	glutamate dehydrogenase 1	10q23.3	0.796519663645635	7.69228728979472	0.00140240332080985
39670_at	PARP3	poly (ADP-ribose) polymerase family, member 3	3p21.31-p21.1	0.79640162590535	4.40457850041388	5.92920521924521e-05
39091_at	ARL6IP5	ADP-ribosylation-like factor 6 interacting protein 5	3p14	0.793794439606302	6.98551041537235	0.00360925714403333
1653_at	RPS3A	ribosomal protein S3A	4q31.2-q31.3	0.791401722329846	12.0700285427535	1.58126858076484e-05
37303_at	PARP4	poly (ADP-ribose) polymerase family, member 4	13q11	0.789412188598304	6.81424365357482	0.00282270052480845
31794_at	NT5C2	5'-nucleotidase, cytosolic II	10q24.32	0.789075836128413	7.63071069751637	0.000748995671995245
37237_at	AP3M2	adaptor-related protein complex 3, mu 2 subunit	8p11.2	0.787845223879852	5.3865094622485	0.00107466877553591
35955_at	CECR7	cat eye syndrome chromosome region, candidate 7 (non-protein coding)	22q11.1	0.786516885657581	6.34525098812256	0.00213411258044332
31519_f_at	BTF3	basic transcription factor 3	5q13.2	0.785915684577364	7.59983437482226	3.85405958762989e-06
32165_at	SRSF7	serine/arginine-rich splicing factor 7	2p22.1	0.78439030617379	7.26863883930615	0.00281516683472843
31804_f_at	SULT1A1	sulfotransferase family, cytosolic, 1A, phenol-preferring, member 1	16p12.1	0.78028641550581	7.68338628918788	0.00229509431654573
33908_at	CAPN1	calpain 1, (mu/I) large subunit	11q13	0.778893858276549	10.0439956840756	0.000981929419868498
39244_at	RAB4A	RAB4A, member RAS oncogene family	1q42-q43	0.775838873600983	5.66959514694314	0.00108447969343874
31722_at	RPL3	ribosomal protein L3	22q13	0.774677066705387	12.0762663945142	1.42980484514626e-06
32781_f_at	DST	dystonin	6p12.1	0.772208202949391	3.07794103211963	0.00724878738573722
40415_at	ACAA1	acetyl-CoA acyltransferase 1	3p23-p22	0.771962820865733	5.64141155421667	0.0017254695845629
40220_at	HEXIM1	hexamethylene bis-acetamide inducible 1	17q21.31	0.76964804239415	5.246480909026	0.0055217849344172
36643_at	DDR1	discoidin domain receptor tyrosine kinase 1	6p21.3	0.768447578223748	9.4147934327296	0.00015661467494998
41454_at	HEBP2	heme binding protein 2	6q24	0.767017238143886	9.36978386302084	0.000887473115288388
36626_at	HSD17B4	hydroxysteroid (17-beta) dehydrogenase 4	5q21	0.765455521182902	8.48053512543334	0.000901502083839677
40500_at	NDRG4	NDRG family member 4	16q21-q22.1	0.764780885349006	4.21143407493595	0.00949250524422266
1687_s_at	BAK1	BCL2-antagonist/killer 1	6p21.3	0.764778893082442	5.40066585845208	0.00128651030926187
41021_s_at	GPD2	glycerol-3-phosphate dehydrogenase 2 (mitochondrial)	2q24.1	0.76389802224093	4.04923753153591	0.00674390042285508
34707_at	CHD3	chromodomain helicase DNA binding protein 3	17p13.1	0.762989366416402	7.43751658792688	0.000454694542760553
314_at	PIGB	phosphatidylinositol glycan anchor biosynthesis, class B	15q21-q22	0.762140918765478	4.36940512819002	0.000120350142722828
32053_at	CCNT2	cyclin T2	2q21.3	0.760591494395367	5.75997260312292	0.00130269122860831
35861_at	ST3GAL1	ST3 beta-galactoside alpha-2,3-sialyltransferase 1	8q24.22	0.75365012863617	4.85453566313700	0.00117516145137399
34767_at	MOAP1	modulator of apoptosis 1	14q32	0.75285013133306	6.43505773895226	0.00319784935629648
41192_at	CCBL2	cysteine conjugate-beta lyase 2	1p22.2	0.750990197651343	7.6609665518966	0.000607034480459182
32622_at	DNM2	dynamin 2	19p13.2	0.750900599641282	8.42329612814183	0.000735174690522344
33750_at	PTPRU	protein tyrosine phosphatase, receptor type, U	1p35.3	0.749588129441073	6.11376633997218	0.00113930015164034
41830_at	KIAA0494	KIAA0494	1pter-p22.1	0.746171641917188	8.37104907530044	0.00102302643542096
38252_s_at	AGL	amylo-alpha-1, 6-glucosidase, 4-alpha-glucanotransferase	1p21	0.745725991725185	6.55791832297834	0.000657473183935334
40471_at	PEX19	peroxisomal biogenesis factor 19	1q23.2	0.744629119803505	5.15740473371263	0.000499369955084089
36217_at	STK38	serine/threonine kinase 38	6p21	0.7432713489198	6.25046059144122	0.00674390042285508
39058_at	ABR	active BCR-related gene	17p13.3	0.743250727613741	6.37702367575855	0.00342675440140199
39540_at	ZBTB7A	zinc finger and BTB domain containing 7A	19p13.3	0.743120932994025	7.13204429572091	0.00208123865980379
36961_at	LETMD1	LETM1 domain containing 1	12q13.12	0.741300811618843	6.57656668031648	7.23612745484792e-06
1116_at				0.740237426414915	6.38331860467896	0.00116257702252176
1742_at	ERBB3	v-erb-b2 erythroblastic leukemia viral oncogene homolog 3 (avian)	12q13	0.739483766305392	5.39471115601083	0.000521721421542097
35055_at	BTF3	basic transcription factor 3	5q13.2	0.739406659401556	10.5533668036623	5.24823694106267e-06
35507_at	ARFIP1	ADP-ribosylation factor interacting protein 1	4q31.3	0.739277038846668	5.25120448676012	0.000876125430036726
2076_s_at	EFNB1	ephrin-B1	Xq12	0.739229006944741	4.87048486256699	0.000114786373581866
34332_at	GNPDA1	glucosamine-6-phosphate deaminase 1	5q21	0.738674943830669	8.26492454803633	0.000323612514228927
36417_s_at	ACAA1	acetyl-CoA acyltransferase 1	3p23-p22	0.73740375209114	8.47564121967255	0.000651293041303338
40615_at	SPG11	spastic paraplegia 11 (autosomal recessive)	15q14	0.737263629957787	8.14980346356617	0.00296001607476092
32634_s_at	ICA1	islet cell autoantigen 1, 69kDa	7p22	0.735419365031072	6.41398331382169	0.00718529227954438
41101_at	FIG4	FIG4 homolog, SAC1 lipid phosphatase domain containing (S. cerevisiae)	6q21	0.734686372530446	5.96027522489989	0.00152701522487023
40067_at	ELF1	E74-like factor 1 (ets domain transcription factor)	13q13	0.733793944758273	6.21562320780081	0.0055217849344172
776_at	PIGF	phosphatidylinositol glycan anchor biosynthesis, class F	2p21-p16	0.732773875636763	6.70715833049348	0.00390299240265029
39027_at	COX4I1	cytochrome c oxidase subunit IV isoform 1	16q24.1	0.732154455975829	10.1281931269519	7.48277356646562e-06
39713_at	KDM5B	lysine (K)-specific demethylase 5B	1q32.1	0.730154053716999	6.54443291982975	0.00178167459461946
34784_at	TRIOBP	TRIO and F-actin binding protein	22q13.1	0.729202886387837	6.58129737644295	0.000502181913928189
40436_g_at	SLC25A6	solute carrier family 25 (mitochondrial carrier; adenine nucleotide translocator), member 6	Xp22.32	0.725969163810383	10.0814544947589	0.000104730362282470
41346_at	LARGE	like-glycosyltransferase	22q12.3	0.725852501924834	4.79514075122652	0.00168305931691039
31491_s_at	CASP8	caspase 8, apoptosis-related cysteine peptidase	2q33-q34	0.72415240380827	6.31801268092237	0.000742221792631749
41809_at	C7orf23	chromosome 7 open reading frame 23	7q21.1-q21.2	0.722831821457897	6.70033362455499	0.00976532484840755
33381_at	NCOA3	nuclear receptor coactivator 3	20q12	0.717910369347328	8.12044235704163	0.00484303012039868
1220_g_at	IRF2	interferon regulatory factor 2	4q34.1-q35.1	0.715967994557246	5.02046370601741	0.000277257713410895
312_s_at	PTK2	PTK2 protein tyrosine kinase 2	8q24.3	0.715493861202704	7.8898598936803	0.00205795392274448
33989_f_at	TMBIM6	transmembrane BAX inhibitor motif containing 6	12q12-q13	0.713101424280001	10.6273386248989	0.00133502949015481
37266_at	ZNF32	zinc finger protein 32	10q22-q25	0.712858190405814	5.04462552732402	0.003370446303667
36204_at	PTPRF	protein tyrosine phosphatase, receptor type, F	1p34	0.710649285650769	9.84155561753463	0.000482952566669138
1357_at	USP4	ubiquitin specific peptidase 4 (proto-oncogene)	3p21.3	0.710045525858466	7.4057487318451	0.000823358885315093
39650_s_at	PCNXL2	pecanex-like 2 (Drosophila)	1q42.2	0.706755028966877	4.6825100075585	0.00173737272405276
35155_at	BTBD2	BTB (POZ) domain containing 2	19p13.3	0.7063500842157	5.55779716493009	0.00280600625460588
36117_at	PTK2	PTK2 protein tyrosine kinase 2	8q24.3	0.70566300181418	7.83399525415348	0.0007023830330427
38453_at	ICAM2	intercellular adhesion molecule 2	17q23-q25	0.701122730829671	4.39410097720928	0.00434969350162643
1251_g_at	RAP1GAP	RAP1 GTPase activating protein	1p36.1-p35	0.699575577753954	4.39693791105364	0.00175074464128253
35748_at	EEF1B2	eukaryotic translation elongation factor 1 beta 2	2q33.3	0.699301801323148	10.4419791644431	0.000126730573457067
631_g_at	DCTD	dCMP deaminase	4q35.1	0.696100270024565	8.22156647897727	0.000120350142722828
38104_at	DECR1	2,4-dienoyl CoA reductase 1, mitochondrial	8q21.3	0.695242380047628	9.45406843281217	0.00388916071404149
38221_at	CNKSR1	connector enhancer of kinase suppressor of Ras 1	1p36.11	0.694527759849324	5.41288079844933	0.00286874371458502
37341_at	GLUD1	glutamate dehydrogenase 1	10q23.3	0.690959411864229	7.14078572600872	0.000155817090547717
33676_at	RPL31	ribosomal protein L31	2q11.2	0.690560211673406	12.4707743558651	0.000122356004573627
39083_at	UBE2D3	ubiquitin-conjugating enzyme E2D 3 (UBC4/5 homolog, yeast)	4q24	0.687345092141806	7.43866454979261	0.000466721776814286
38681_at	EIF3E	eukaryotic translation initiation factor 3, subunit E	8q22-q23	0.684934660876662	10.1322408884031	0.00138909826105462
37727_i_at	RCN2	reticulocalbin 2, EF-hand calcium binding domain	15q23	0.682923565798426	5.60894183283304	0.00494620900761691
37392_at	PHKB	phosphorylase kinase, beta	16q12-q13	0.678926818950875	7.72146732796935	0.00448349245584088
38106_at	NSA2	NSA2 ribosome biogenesis homolog (S. cerevisiae)	5q13.3	0.677843128270202	6.5781680664883	0.000680330008337795
35808_at	SRSF6	serine/arginine-rich splicing factor 6	20q12-q13.1	0.676077770988746	8.41715970063775	0.00458406849527919
39049_at	GPSM3	G-protein signaling modulator 3	6p21.3	0.674128334369513	4.81116289356614	0.00729167215921042
31509_at	RPL13	ribosomal protein L13	16q24.3	0.673820607055836	11.2420758303203	7.06685281309983e-05
41828_at	MBD1	methyl-CpG binding domain protein 1	18q21	0.673528450877306	5.73788272598127	0.000441582822473131
38425_at	HMGCL	3-hydroxymethyl-3-methylglutaryl-CoA lyase	1p36.1-p35	0.673177738166102	6.06924213318445	0.00540857771551043
36104_at	UQCRH	ubiquinol-cytochrome c reductase hinge protein	1p34.1	0.672944810067353	10.0777029314298	0.00204630196062006
33451_s_at	RPL22	ribosomal protein L22	1p36.31	0.67280956597952	10.7471560445738	3.75795211282054e-05
41665_at	PCF11	PCF11, cleavage and polyadenylation factor subunit, homolog (S. cerevisiae)	11q13	0.67187849565656	6.29431716213084	0.00163941406638293
32433_at	RPL15	ribosomal protein L15	3p24.2	0.671579386629149	6.53135740417361	0.000961121070621468
36079_at	TP53I3	tumor protein p53 inducible protein 3	2p23.3	0.669997065959147	5.36225654995945	0.00887559058530797
35125_at	RPS6	ribosomal protein S6	9p21	0.667033200124701	12.1522903014407	0.000292566799144059
35960_at	IKBKB	inhibitor of kappa light polypeptide gene enhancer in B-cells, kinase beta	8p11.2	0.666786099905801	5.2506023617699	0.000643223299165615
34324_at	CLN5	ceroid-lipofuscinosis, neuronal 5	13q21.1-q32	0.665178256875837	4.64166244031312	0.00142752001716437
41338_at	AES	amino-terminal enhancer of split	19p13.3	0.664626936425238	10.5353458352919	0.00776308983402916
36530_g_at	TRAPPC6A	trafficking protein particle complex 6A	19q13.32	0.663200070599566	6.35920889554549	0.00361882105624094
34801_at	PAN2	PAN2 poly(A) specific ribonuclease subunit homolog (S. cerevisiae)	12q13.2	0.662294795463424	6.32514998938	0.00184087062825735
38226_at	INTS10	integrator complex subunit 10	8p21.3	0.662056850219385	6.36090778497664	0.00429345034739505
41524_at	INPP1	inositol polyphosphate-1-phosphatase	2q32	0.660916538145906	6.2657331362908	0.000687329932988757
40545_at	PROSC	proline synthetase co-transcribed homolog (bacterial)	8p11.2	0.658614425326983	5.51149517871394	0.00368153146075675
35139_at	ZNF248	zinc finger protein 248	10p11.2	0.656315585895311	5.85719452791866	0.00274890348119967
32597_at	RBL2	retinoblastoma-like 2 (p130)	16q12.2	0.649930862672734	8.48742694797455	0.00222243174370970
35809_g_at	SRSF6	serine/arginine-rich splicing factor 6	20q12-q13.1	0.647443598238429	8.8295495219914	0.00595642752756441
32146_s_at	ADD1	adducin 1 (alpha)	4p16.3	0.646324423071571	6.38702016508877	0.00163941406638293
41759_at	SKP1	S-phase kinase-associated protein 1	5q31	0.645179853903377	8.55782079270895	0.000303962683053030
35373_at	PIK3R1	phosphoinositide-3-kinase, regulatory subunit 1 (alpha)	5q13.1	0.639867548085991	3.2432699709958	0.00836320873750103
35221_at	PURA	purine-rich element binding protein A	5q31	0.639784190719498	7.00944373760757	0.00837198782719233
39709_at	SEPW1	selenoprotein W, 1	19q13.3	0.639716738303608	8.37188998041779	0.000897450493378732
34769_at	FAAH	fatty acid amide hydrolase	1p35-p34	0.634128278408044	5.78844647101225	0.00469762727272492
1935_at	MDM4	Mdm4 p53 binding protein homolog (mouse)	1q32	0.634110361065607	2.64833315579896	0.00346443308120748
1939_at	TP53	tumor protein p53	17p13.1	0.633344415173375	6.7491716048277	0.00855547642378839
33807_at	PLEKHA6	pleckstrin homology domain containing, family A member 6	1q32.1	0.63263072576186	4.26250073367602	0.00460240500242030
40602_at	SPRED2	sprouty-related, EVH1 domain containing 2	2p14	0.632432135531399	6.08836238265602	0.00103918203831761
34340_at	CYB5B	cytochrome b5 type B (outer mitochondrial membrane)	16q22.1	0.6290691469092	6.98603519872732	0.00151713957077280
33396_at	GSTP1	glutathione S-transferase pi 1	11q13	0.628411395546841	10.4000824877508	0.00898674848200037
35764_at	OFD1	oral-facial-digital syndrome 1	Xp22	0.627371887035997	5.36483846932336	0.00332893732782739
38864_at	NFATC2IP	nuclear factor of activated T-cells, cytoplasmic, calcineurin-dependent 2 interacting protein	16p11.2	0.626552643550497	7.72449227669456	0.00358246336463021
40569_at	MZF1	myeloid zinc finger 1	19q13.4	0.625105359326422	6.15809554650026	0.00763996172015696
33788_at	ENTPD4	ectonucleoside triphosphate diphosphohydrolase 4	8p21.3	0.624421847773304	6.82600039987319	0.00427850087835667
33485_at	RPL4	ribosomal protein L4	15q22	0.623104898840356	11.9287342141026	0.00184899666723912
35645_at	SNX1	sorting nexin 1	15q22.31	0.622657449930314	5.5123650119269	0.00674390042285508
41267_at	TCF25	transcription factor 25 (basic helix-loop-helix)	16q24.3	0.617141982212604	8.0704913129068	0.00059226809376499
37638_at	DOCK1	dedicator of cytokinesis 1	10q26.13-q26.3	0.616127735057399	5.93577682470536	0.0097701192330129
37915_at	BAZ2B	bromodomain adjacent to zinc finger domain, 2B	2q24.2	0.614329543218762	6.08098949673458	0.00135020486180204
38306_at	ARFGEF1	ADP-ribosylation factor guanine nucleotide-exchange factor 1(brefeldin A-inhibited)	8q13	0.612598190479733	8.2071183191745	0.00788020987452187
39580_at	KIAA0649	KIAA0649	9q34.3	0.610321602083629	5.10692938590328	0.000961121070621468
32576_at	EIF3F	eukaryotic translation initiation factor 3, subunit F	11p15.4	0.609966123508535	10.4676003100139	0.00159304911198232
555_at	RAB40B	RAB40B, member RAS oncogene family	17q25.3	0.60888387213175	4.95228445032223	0.00684723408610453
40171_at	FRAT2	frequently rearranged in advanced T-cell lymphomas 2	10q24.1	0.607822017290102	5.37233005712651	0.0098489086452316
37299_at	GYS1	glycogen synthase 1 (muscle)	19q13.3	0.60665420384386	6.86733752339851	0.00875737407859207
39721_at	EFNB1	ephrin-B1	Xq12	0.604544431238132	6.57900657016929	0.00431372938111428
33988_at	TMBIM6	transmembrane BAX inhibitor motif containing 6	12q12-q13	0.60443034192252	10.3964100838671	0.00130927732770255
31584_at	TPT1	tumor protein, translationally-controlled 1	13q14	0.604230921466014	12.280701589667	0.00147912658058521
36432_at	MCCC2	methylcrotonoyl-CoA carboxylase 2 (beta)	5q12-q13	0.603845978847052	5.91690825451802	0.00345704407222084
38067_at	SEPT8	septin 8	5q31	0.603124536930881	8.8517457687059	0.00807222976538813
33668_at	RPL12	ribosomal protein L12	9q34	0.601682761491233	11.3834623882404	0.00190554138279705
38807_at	HSPA4	heat shock 70kDa protein 4	5q31.1	0.601237948460219	4.20196198459454	0.00489928140193528

## Sheet: DyrskjotNatGen Invasive Up
ID	Symbol	Gene Title	Chromosome	logFC	AveExpr	adj.P.Val
Y00787_s_at	IL8	interleukin 8	4q13-q21	-6.15775	8.62806	0.000190256
L10343_at	PI3	peptidase inhibitor 3, skin-derived	20q13.12	-5.43342	5.08225	8.82135e-05
M28130_rna1_s_at	IL8	interleukin 8	4q13-q21	-5.247	4.87328	0.000135765
V00594_at				-5.09926	8.70918	0.000190256
M23178_s_at				-4.88487	4.20234	4.4359e-06
L23808_at	MMP12	matrix metallopeptidase 12 (macrophage elastase)	11q22.3	-4.87675	6.63617	0.00360143
J04130_s_at	CCL4	chemokine (C-C motif) ligand 4	17q12	-4.65479	6.21153	0.000432798
U52101_at	EMP3	epithelial membrane protein 3	19q13.3	-4.55311	4.83104	6.36264e-06
X54489_rna1_at	CXCL1	chemokine (C-X-C motif) ligand 1 (melanoma growth stimulating activity, alpha)	4q21	-4.51924	5.70528	0.00437018
M69203_s_at	CCL4	chemokine (C-C motif) ligand 4	17q12	-4.51601	3.25893	9.57051e-08
U20758_rna1_at	SPP1	secreted phosphoprotein 1	4q22.1	-4.49499	8.02178	0.000190256
D13666_s_at	POSTN	periostin, osteoblast specific factor	13q13.3	-4.36543	8.20644	0.00305755
M72885_rna1_s_at	G0S2	G0/G1switch 2	1q32.2	-4.33439	8.38318	9.57051e-08
U20158_at	LCP2	lymphocyte cytosolic protein 2 (SH2 domain containing leukocyte protein of 76kDa)	5q33.1-qter	-4.32019	5.65558	0.000190109
U29680_at	BCL2A1	BCL2-related protein A1	15q24.3	-4.21991	3.85479	0.000300432
K01396_at	SERPINA1	serpin peptidase inhibitor, clade A (alpha-1 antiproteinase, antitrypsin), member 1	14q32.1	-4.15657	8.65964	3.55025e-05
J05070_at	MMP9	matrix metallopeptidase 9 (gelatinase B, 92kDa gelatinase, 92kDa type IV collagenase)	20q11.2-q13.1	-4.13657	7.33944	3.44274e-07
X13334_at	CD14	CD14 molecule	5q22-q32	-3.9629	9.41398	8.77693e-06
HG3044-HT3742_s_at				-3.79915	10.8036	0.00354485
X04500_at	IL1B	interleukin 1, beta	2q14	-3.71244	8.32421	0.000190256
M57731_s_at	CXCL2	chemokine (C-X-C motif) ligand 2	4q21	-3.66986	3.08959	8.64915e-06
M20681_at	SLC2A3	solute carrier family 2 (facilitated glucose transporter), member 3	12p13.3	-3.63284	7.58334	0.000383181
X04602_s_at	IL6	interleukin 6 (interferon, beta 2)	7p21	-3.44421	3.40524	0.00390361
X64072_s_at	ITGB2	integrin, beta 2 (complement component 3 receptor 3 and 4 subunit)	21q22.3	-3.40557	7.35543	0.000328295
L06797_s_at	CXCR4	chemokine (C-X-C motif) receptor 4	2q21	-3.39906	7.56271	0.00253687
X02761_s_at	FN1	fibronectin 1	2q34	-3.284	11.2993	0.00594727
X15882_at	COL6A2	collagen, type VI, alpha 2	21q22.3	-3.27782	10.7565	0.00033675
M33195_at	FCER1G	Fc fragment of IgE, high affinity I, receptor for; gamma polypeptide	1q23	-3.20792	8.89583	0.000853248
L19871_at	ATF3	activating transcription factor 3	1q32.3	-3.20726	6.43185	0.000425446
X57351_at				-3.11523	10.187	0.000170119
X07438_s_at	RBP1	retinol binding protein 1, cellular	3q23	-3.05969	9.2396	0.00360143
M24283_at	ICAM1	intercellular adhesion molecule 1	19p13.3-p13.2	-3.03824	3.9998	1.3137e-05
M32304_s_at	TIMP2	TIMP metallopeptidase inhibitor 2	17q25	-2.92737	6.77743	0.000450721
M62505_at	C5AR1	complement component 5a receptor 1	19q13.3-q13.4	-2.90405	3.9703	0.000339521
K03430_at	C1QB	complement component 1, q subcomponent, B chain	1p36.12	-2.88542	9.91186	0.000639394
M63262_at	ALOX5AP	arachidonate 5-lipoxygenase-activating protein	13q12	-2.87477	8.55677	0.000775759
U09937_rna1_s_at	PLAUR	plasminogen activator, urokinase receptor	19q13	-2.87469	6.44916	1.57788e-09
X52541_at	EGR1	early growth response 1	5q31.1	-2.86197	9.086	0.00253687
M11433_at	RBP1	retinol binding protein 1, cellular	3q23	-2.85469	3.38432	0.00848528
U26727_at	CDKN2A	cyclin-dependent kinase inhibitor 2A (melanoma, p16, inhibits CDK4)	9p21	-2.85034	3.37688	0.000124214
D10925_at	CCR1	chemokine (C-C motif) receptor 1	3p21	-2.78853	4.93645	0.000425446
L49169_at	FOSB	FBJ murine osteosarcoma viral oncogene homolog B	19q13.32	-2.77734	7.87671	0.00142163
X89109_s_at	CORO1A	coronin, actin binding protein, 1A	16p11.2	-2.70285	7.89384	0.00407235
M63835_at	FCGR1A	Fc fragment of IgG, high affinity Ia, receptor (CD64)	1q21.2-q21.3	-2.66976	4.31144	0.00599187
U08021_at	NNMT	nicotinamide N-methyltransferase	11q23.1	-2.59632	10.3422	0.00190814
J03909_at	IFI30	interferon, gamma-inducible protein 30	19p13.1	-2.55423	10.7625	0.000511463
X59770_at	IL1R2	interleukin 1 receptor, type II	2q12	-2.53837	5.68074	0.000119414
V00594_s_at	MT2A	metallothionein 2A	16q13	-2.53385	12.7737	5.63531e-05
Z74615_at	COL1A1	collagen, type I, alpha 1	17q21.33	-2.51896	10.564	0.000731895
X66945_at	FGFR1	fibroblast growth factor receptor 1	8p12	-2.45231	8.65823	0.00450213
U51010_s_at	NNMT	nicotinamide N-methyltransferase	11q23.1	-2.43468	7.69481	0.00252338
Z84721_cds2_at				-2.36876	10.9769	0.000495477
M77349_at	TGFBI	transforming growth factor, beta-induced, 68kDa	5q31	-2.36404	11.1975	0.00525483
S78187_at	CDC25B	cell division cycle 25 homolog B (S. pombe)	20p13	-2.34237	9.87133	5.63531e-05
M25079_s_at				-2.33684	12.9086	0.000170119
M59465_at	TNFAIP3	tumor necrosis factor, alpha-induced protein 3	6q23	-2.30419	9.12529	0.000354896
L13698_at	GAS1	growth arrest-specific 1	9q21.3-q22	-2.29728	4.09329	0.00551885
D87433_at	STAB1	stabilin 1	3p21.1	-2.20391	8.48203	0.00236809
U28488_s_at	C3AR1	complement component 3a receptor 1	12p13.31	-2.19095	3.51209	0.000804662
X53416_at	FLNA	filamin A, alpha	Xq28	-2.12571	11.2769	0.00341888
M12529_at	APOE	apolipoprotein E	19q13.2	-2.11305	12.1705	0.00101601
S81914_at	IER3	immediate early response 3	6p21.3	-2.07358	11.0634	0.00542108
M95178_at	ACTN1	actinin, alpha 1	14q22-q24	-2.05656	10.5898	0.000818422
L20971_at	PDE4B	phosphodiesterase 4B, cAMP-specific	1p31	-2.04676	4.43435	0.00792104
J04456_at	LGALS1	lectin, galactoside-binding, soluble, 1	22q13.1	-2.0179	12.9916	0.00190814
S57132_s_at	COL16A1	collagen, type XVI, alpha 1	1p35-p34	-1.95714	8.70524	5.63531e-05
X90858_at	UPP1	uridine phosphorylase 1	7p12.3	-1.92845	8.8757	7.33409e-05
M11749_at	THY1	Thy-1 cell surface antigen	11q23.3	-1.92489	8.8913	0.00802564
X15880_at	COL6A1	collagen, type VI, alpha 1	21q22.3	-1.92309	11.6126	0.000553423
X68090_s_at	FCGR2A	Fc fragment of IgG, low affinity IIa, receptor (CD32)	1q23	-1.89695	3.97379	0.000114259
L22548_at	COL18A1	collagen, type XVIII, alpha 1	21q22.3	-1.89436	8.26005	0.000865331
M59807_at	IL32	interleukin 32	16p13.3	-1.88799	10.1922	0.000163822
X06256_at	ITGA5	integrin, alpha 5 (fibronectin receptor, alpha polypeptide)	12q11-q13	-1.86182	5.97498	0.00215749
U04810_at	TROAP	trophinin associated protein (tastin)	12q13.12	-1.86022	4.61052	0.00390361
HG1428-HT1428_s_at				-1.85826	13.5832	0.00199432
X13293_at	MYBL2	v-myb myeloblastosis viral oncogene homolog (avian)-like 2	20q13.1	-1.81365	7.6663	0.000448558
M32315_at	TNFRSF1B	tumor necrosis factor receptor superfamily, member 1B	1p36.22	-1.8079	8.5852	0.00147773
Z19554_s_at	VIM	vimentin	10p13	-1.74383	13.9898	0.00154178
HG544-HT544_at				-1.74067	10.3102	0.00145935
U68485_at	BIN1	bridging integrator 1	2q14	-1.70713	8.15452	0.000410197
M64925_at	MPP1	membrane protein, palmitoylated 1, 55kDa	Xq28	-1.70342	6.58302	0.00709393
X03663_at	CSF1R	colony stimulating factor 1 receptor	5q32	-1.70294	7.95408	0.000853248
L13720_at	GAS6	growth arrest-specific 6	13q34	-1.67615	8.48965	0.00535848
U09770_at	CRIP1	cysteine-rich protein 1 (intestinal)	14q32.33	-1.66917	6.34065	0.0017335
U79266_at	SAC3D1	SAC3 domain containing 1	11q13.1	-1.669	3.23943	0.00124912
M55998_s_at	COL1A1	collagen, type I, alpha 1	17q21.33	-1.64654	13.3583	0.000731895
HG1751-HT1768_at				-1.63959	8.55283	0.00902026
HG4069-HT4339_s_at				-1.58408	9.23794	0.00264227
J04599_at	BGN	biglycan	Xq28	-1.57358	5.44062	0.000448558
HG2724-HT2820_at				-1.57311	9.22033	0.00176433
U59877_s_at	RAB31	RAB31, member RAS oncogene family	18p11.3	-1.5678	10.0539	0.00599187
X59892_at	WARS	tryptophanyl-tRNA synthetase	14q32.31	-1.56505	10.535	0.00385323
J03278_at	PDGFRB	platelet-derived growth factor receptor, beta polypeptide	5q33.1	-1.55813	8.59128	0.00688634
M27288_at	OSM	oncostatin M	22q12.2	-1.51916	7.4062	0.00131225
U76764_s_at	CD97	CD97 molecule	19p13	-1.49939	7.97127	0.00212787
X64177_f_at	MT1H	metallothionein 1H	16q13	-1.48626	3.5102	0.000676937
U25956_at	SELPLG	selectin P ligand	12q24	-1.46571	3.20716	0.00682934
L13740_at	NR4A1	nuclear receptor subfamily 4, group A, member 1	12q13	-1.46219	8.61085	0.000307989
D11086_at	IL2RG	interleukin 2 receptor, gamma	Xq13.1	-1.44264	10.5749	0.00798167
X06985_at	HMOX1	heme oxygenase (decycling) 1	22q12	-1.43898	9.3408	0.00563266
U72661_at	NINJ1	ninjurin 1	9q22	-1.43693	9.44937	0.00688634
X57351_s_at				-1.41511	14.0254	0.000706378
U26173_s_at	NFIL3	nuclear factor, interleukin 3 regulated	9q22	-1.41176	8.24882	0.00977834
U05340_at	CDC20	cell division cycle 20 homolog (S. cerevisiae)	1p34.1	-1.41071	11.0128	0.00361931
U05681_s_at	BCL3	B-cell CLL/lymphoma 3	19q13.1-q13.2	-1.41019	9.29316	0.00785677
M91670_at	UBE2S	ubiquitin-conjugating enzyme E2S	19q13.43	-1.39999	9.63273	0.00688634
S77154_s_at	NR4A2	nuclear receptor subfamily 4, group A, member 2	2q22-q23	-1.3979	7.06416	0.000793501
M33318_r_at				-1.37898	10.4839	0.00800878
L25876_at	CDKN3	cyclin-dependent kinase inhibitor 3	14q22	-1.27967	7.53354	0.00369881
M20778_s_at	COL6A3	collagen, type VI, alpha 3	2q37	-1.25901	4.01684	0.00782158
U77846_rna1_s_at	ELN	elastin	7q11.23	-1.24853	9.79063	0.00777144
U64105_at	ARHGEF1	Rho guanine nucleotide exchange factor (GEF) 1	19q13.13	-1.22147	8.52666	0.00751453
D16581_at	NUDT1	nudix (nucleoside diphosphate linked moiety X)-type motif 1	7p22	-1.16495	9.84222	0.000300432
D49824_s_at				-1.06851	16.0085	0.00308642
S76638_at	NFKB2	nuclear factor of kappa light polypeptide gene enhancer in B-cells 2 (p49/p100)	10q24	-1.0025	7.65961	0.00354485
M37435_at	CSF1	colony stimulating factor 1 (macrophage)	1p21-p13	-1.00197	6.62879	0.00176909
M62324_at	ARID5A	AT rich interactive domain 5A (MRF1-like)	2q11.2	-0.991404	7.88906	0.00309826
S49592_s_at	E2F1	E2F transcription factor 1	20q11.2	-0.99001	4.79044	0.00863885
X13967_at	LIF	leukemia inhibitory factor (cholinergic differentiation factor)	22q12.2	-0.903201	6.70819	0.00688634
HG3415-HT3598_at				-0.87972	6.74435	0.00305755
X00351_f_at	ACTB	actin, beta	7p22	-0.830942	15.3799	0.00817509
X96506_s_at	DRAP1	DR1-associated protein 1 (negative cofactor 2 alpha)	11q13.3	-0.797066	10.4249	0.00224271
S67247_s_at	MYH10	myosin, heavy chain 10, non-muscle	17p13	-0.780649	6.20029	0.00578047
M10277_s_at	ACTB	actin, beta	7p22	-0.736465	15.2955	0.00322115
M17733_at	TMSB4X	thymosin beta 4, X-linked	Xq21.3-q22	-0.727079	15.3466	0.00902026
X56681_s_at	JUND	jun D proto-oncogene	19p13.2	-0.72349	13.359	0.00260221
L38696_at	RALY	RNA binding protein, autoantigenic (hnRNP-associated with lethal yellow homolog (mouse))	20q11.21-q11.23	-0.721781	12.0113	0.007677
X90824_s_at	USF2	upstream transcription factor 2, c-fos interacting	19q13	-0.707006	10.5346	0.00816631

## Sheet: DyrskjotNatGen Inasive Down
ID	Symbol	Gene Title	Chromosome	logFC	AveExpr	adj.P.Val
X73501_at	KRT20	keratin 20	17q21.2	6.46758	8.32738	0.00040756
J05036_s_at	CTSE	cathepsin E	1q31	5.33525	9.4844	0.00322115
X83618_at	HMGCS2	3-hydroxy-3-methylglutaryl-CoA synthase 2 (mitochondrial)	1p13-p12	5.15646	12.3852	0.000170119
L76465_at	HPGD	hydroxyprostaglandin dehydrogenase 15-(NAD)	4q34-q35	5.02527	12.2777	5.65268e-05
M64347_at	FGFR3	fibroblast growth factor receptor 3	4p16.3	4.88407	10.9934	0.000531952
Y00705_at	SPINK1	serine peptidase inhibitor, Kazal type 1	5q32	4.78192	12.6212	0.00320579
J02871_s_at	CYP4B1	cytochrome P450, family 4, subfamily B, polypeptide 1	1p34-p12	4.63119	12.2795	2.43332e-06
J04093_s_at				4.55979	12.2647	0.000187403
L11708_at	HSD17B2	hydroxysteroid (17-beta) dehydrogenase 2	16q24.1-q24.2	4.41549	11.4881	0.000170119
X68314_at	GPX2	glutathione peroxidase 2 (gastrointestinal)	14q24.1	4.30231	13.3004	9.84398e-05
X58072_at	GATA3	GATA binding protein 3	10p15	4.24426	12.7067	0.000190256
U31875_at	DHRS2	dehydrogenase/reductase (SDR family) member 2	14q11.2	4.22186	12.896	0.000425446
U90916_at	SORL1	sortilin-related receptor, L(DLR class) A repeats-containing	11q23.2-q24.2	4.14493	11.1236	6.36264e-06
U35735_at	SLC14A1	solute carrier family 14 (urea transporter), member 1 (Kidd blood group)	18q11-q12	4.05311	7.79787	5.63531e-05
D17793_at	AKR1C3	aldo-keto reductase family 1, member C3 (3-alpha hydroxysteroid dehydrogenase, type II)	10p15-p14	3.87839	12.6265	0.000731895
X65614_at	S100P	S100 calcium binding protein P	4p16	3.82965	14.3178	0.000142704
U37143_at	CYP2J2	cytochrome P450, family 2, subfamily J, polypeptide 2	1p31.3-p31.2	3.63974	7.92439	7.33409e-05
Z12173_at	GNS	glucosamine (N-acetyl)-6-sulfatase	12q14	3.599	7.9209	0.00101217
J04152_rna1_s_at	TACSTD2	tumor-associated calcium signal transducer 2	1p32	3.5327	14.6725	0.00162246
D89377_s_at	MSX2	msh homeobox 2	5q35.2	3.43663	8.21222	6.36264e-06
D00408_s_at				3.32483	7.64641	0.00181404
L40904_at	PPARG	peroxisome proliferator-activated receptor gamma	3p25	3.27985	11.5932	6.36264e-06
S78825_at	ID1	inhibitor of DNA binding 1, dominant negative helix-loop-helix protein	20q11	3.26076	8.37373	0.00190814
U05861_at	AKR1C1	aldo-keto reductase family 1, member C1 (dihydrodiol dehydrogenase 1; 20-alpha (3-alpha)-hydroxysteroid dehydrogenase)	10p15-p14	3.23294	13.6042	0.000137377
X87159_at	SCNN1B	sodium channel, nonvoltage-gated 1, beta	16p12.2-p12.1	3.22648	7.33105	0.00782158
X75042_at	REL	v-rel reticuloendotheliosis viral oncogene homolog (avian)	2p13-p12	3.19838	9.78079	8.91603e-05
U59914_at	SMAD6	SMAD family member 6	15q21-q22	3.12893	8.39566	0.000865331
D42047_at	GPD1L	glycerol-3-phosphate dehydrogenase 1-like	3p22.3	3.12474	10.9015	0.000141966
M19720_rna2_at	MYCL1	v-myc myelocytomatosis viral oncogene homolog 1, lung carcinoma derived (avian)	1p34.2	3.11496	10.6599	0.00360143
X02874_at	OAS1	2',5'-oligoadenylate synthetase 1, 40/46kDa	12q24.1	3.11295	10.6985	0.00119003
Z48579_at	ADAM10	ADAM metallopeptidase domain 10	15q2	3.10888	9.1896	0.00096804
M68840_at	MAOA	monoamine oxidase A	Xp11.3	3.05345	10.0432	6.28999e-06
Y07867_at	PIR	pirin (iron-binding nuclear protein)	Xp22.2	3.0096	8.55237	0.00111024
X51801_at	BMP7	bone morphogenetic protein 7	20q13	2.96317	6.92316	0.00292057
Z35402_rna1_s_at	CDH1	cadherin 1, type 1, E-cadherin (epithelial)	16q22.1	2.93589	13.286	0.000425446
U47414_at	CCNG2	cyclin G2	4q21.1	2.88089	10.7478	1.23301e-05
M90656_at	GCLC	glutamate-cysteine ligase, catalytic subunit	6p12	2.7914	11.3419	0.00140981
U28249_at	FXYD3	FXYD domain containing ion transport regulator 3	19q13.12	2.78066	8.81066	0.00592377
Z26491_s_at	COMT	catechol-O-methyltransferase	22q11.21	2.77849	12.5932	5.84001e-06
S82597_rna1_s_at	GALNT1	UDP-N-acetyl-alpha-D-galactosamine:polypeptide N-acetylgalactosaminyltransferase 1 (GalNAc-T1)	18q12.1	2.76052	10.3789	0.000190256
X87241_at	FAT1	FAT tumor suppressor homolog 1 (Drosophila)	4q35	2.72657	12.1552	7.33409e-05
L24203_at	TRIM29	tripartite motif-containing 29	11q22-q23	2.71152	12.8361	0.00665371
U62389_at	IDH1	isocitrate dehydrogenase 1 (NADP+), soluble	2q33.3	2.70327	12.9833	0.000903287
D86959_at	SLK	STE20-like kinase	10q24.33	2.68379	9.17522	0.00253687
L19872_at	AHR	aryl hydrocarbon receptor	7p15	2.68071	12.216	0.00228971
HG3187-HT3366_s_at				2.67293	8.92991	0.000562682
M83822_at	LRBA	LPS-responsive vesicle trafficking, beach and anchor containing	4q31.3	2.64301	10.0098	0.000163822
U44111_at	HNMT	histamine N-methyltransferase	2q22.1	2.56709	8.59198	0.00371669
L42176_at	FHL2	four and a half LIM domains 2	2q12.2	2.54841	11.7454	0.00264227
L20826_at	PLS1	plastin 1	3q23	2.52933	8.58245	0.00875524
X78520_at	CLCN3	chloride channel 3	4q33	2.50451	9.67078	5.63531e-05
M81118_at	ADH5	alcohol dehydrogenase 5 (class III), chi polypeptide	4q23	2.50396	9.73826	0.0013865
X02875_s_at	OAS1	2',5'-oligoadenylate synthetase 1, 40/46kDa	12q24.1	2.46816	10.1791	0.00320579
U36341_rna1_at	SLC6A8	solute carrier family 6 (neurotransmitter transporter, creatine), member 8	Xq28	2.45241	12.031	0.00102529
D14520_at	KLF5	Kruppel-like factor 5 (intestinal)	13q22.1	2.4344	12.8294	0.000190109
M58525_s_at	COMT	catechol-O-methyltransferase	22q11.21	2.36734	12.3748	0.000627783
U07231_at	GRSF1	G-rich RNA sequence binding factor 1	4q13	2.35159	8.47984	0.0085797
U39840_at	FOXA1	forkhead box A1	14q12-q13	2.34047	11.8787	0.000190256
D49387_at	PTGR1	prostaglandin reductase 1	9q31.3	2.33776	11.8392	0.0086082
M35198_at	ITGB6	integrin, beta 6	2q24.2	2.31364	7.57563	0.00922957
U64520_at	VAMP3	vesicle-associated membrane protein 3 (cellubrevin)	1p36.23	2.29389	7.90026	0.00204486
M34309_at	ERBB3	v-erb-b2 erythroblastic leukemia viral oncogene homolog 3 (avian)	12q13	2.26102	12.1306	0.0021742
D79994_at	KANK1	KN motif and ankyrin repeat domains 1	9p24.3	2.25684	10.9807	7.33409e-05
M22898_at	TP53	tumor protein p53	17p13.1	2.25276	8.50353	0.00120555
S58544_at	SPAG1	sperm associated antigen 1	8q22.2	2.1801	6.02061	0.00662668
X69111_at	ID3	inhibitor of DNA binding 3, dominant negative helix-loop-helix protein	1p36.13-p36.12	2.16157	11.4839	0.000965741
X78549_at	PTK6	PTK6 protein tyrosine kinase 6	20q13.3	2.15265	9.11194	0.00119003
D45370_at	C10orf116	chromosome 10 open reading frame 116	10q23.2	2.14936	13.5981	0.00535848
S77393_at	KLF3	Kruppel-like factor 3 (basic)	4p14	2.14722	9.94017	0.000662857
U67156_at	MAP3K5	mitogen-activated protein kinase kinase kinase 5	6q22.33	2.14347	7.99434	0.00667617
M22976_at	CYB5A	cytochrome b5 type A (microsomal)	18q23	2.13047	12.5199	0.000190256
X73882_at	MAP7	microtubule-associated protein 7	6q23.3	2.12517	6.78575	0.00068965
L32832_s_at	ZFHX3	zinc finger homeobox 3	16q22.3	2.07512	10.0517	0.000357258
X55037_s_at	GATA3	GATA binding protein 3	10p15	2.06411	11.9026	0.00164987
J03934_s_at	NQO1	NAD(P)H dehydrogenase, quinone 1	16q22.1	2.01446	11.1085	0.00694287
Z31695_at	INPP5A	inositol polyphosphate-5-phosphatase, 40kDa	10q26.3	2.01101	10.4877	0.000324652
U90902_at	TIAM1	T-cell lymphoma invasion and metastasis 1	21q22.1	2.01065	10.1431	0.00181729
L43821_at	NEDD9	neural precursor cell expressed, developmentally down-regulated 9	6p25-p24	2.00553	7.36542	0.00785677
J03068_at	TRAK1	trafficking protein, kinesin binding 1	3p22.1	1.98815	9.13001	0.00326936
D87292_at	TST	thiosulfate sulfurtransferase (rhodanese)	22q13.1	1.9877	10.6153	0.00216113
D87075_at	SLC23A2	solute carrier family 23 (nucleobase transporters), member 2	20p13	1.95929	10.6912	0.00979363
U90716_at	CXADR	coxsackie virus and adenovirus receptor	21q21.1	1.94152	12.8175	7.33409e-05
M81182_s_at	ABCD3	ATP-binding cassette, sub-family D (ALD), member 3	1p22-p21	1.91597	9.73619	0.00676363
U73191_at	KCNJ15	potassium inwardly-rectifying channel, subfamily J, member 15	21q22.2	1.90862	8.39381	0.00592654
U88871_at	PEX7	peroxisomal biogenesis factor 7	6q23.3	1.90681	6.59132	0.00958688
M99701_at	TCEAL1	transcription elongation factor A (SII)-like 1	Xq22.1	1.85622	10.5056	0.000190109
U60808_s_at	CDS1	CDP-diacylglycerol synthase (phosphatidate cytidylyltransferase) 1	4q21.23	1.84718	9.2662	0.00851782
X68194_at	SYPL1	synaptophysin-like 1	7q22.3	1.82512	9.70821	0.000425446
X75535_at	PEX19	peroxisomal biogenesis factor 19	1q23.2	1.82375	7.75068	0.00592377
X98172_at	CASP8	caspase 8, apoptosis-related cysteine peptidase	2q33-q34	1.81525	9.45577	0.00325556
D13435_at	PIGF	phosphatidylinositol glycan anchor biosynthesis, class F	2p21-p16	1.8151	10.0317	0.00490982
U49352_at	DECR1	2,4-dienoyl CoA reductase 1, mitochondrial	8q21.3	1.7978	11.9785	0.00120555
L27476_at	TJP2	tight junction protein 2 (zona occludens 2)	9q13-q21	1.7873	11.9324	0.000929569
AF000231_at	RAB11A	RAB11A, member RAS oncogene family	15q22.31	1.77577	10.047	0.000245485
X04085_rna1_at	CAT	catalase	11p13	1.76999	11.857	0.00111024
Y00815_at	PTPRF	protein tyrosine phosphatase, receptor type, F	1p34	1.76614	13.0211	0.000223433
U46499_at	MGST1	microsomal glutathione S-transferase 1	12p12.3-p12.1	1.75936	14.2722	0.00106558
U60975_at	SORL1	sortilin-related receptor, L(DLR class) A repeats-containing	11q23.2-q24.2	1.755	13.026	0.00222064
U68019_at	SMAD3	SMAD family member 3	15q22.33	1.74702	9.42648	0.0017087
D78514_at	UBE2G1	ubiquitin-conjugating enzyme E2G 1 (UBC7 homolog, yeast)	17p13.2	1.73496	9.45416	0.00530869
X77794_at	CCNG1	cyclin G1	5q32-q34	1.7172	12.9176	0.00131633
J04058_at	ETFA	electron-transfer-flavoprotein, alpha polypeptide	15q23-q25	1.7119	11.5035	0.000223933
U52840_at	SEMA5A	sema domain, seven thrombospondin repeats (type 1 and type 1-like), transmembrane domain (TM) and short cytoplasmic domain, (semaphorin) 5A	5p15.2	1.70408	10.7368	0.00872103
X94453_at	ALDH18A1	aldehyde dehydrogenase 18 family, member A1	10q24.3	1.70306	8.80752	0.00613724
M92357_at	TNFAIP2	tumor necrosis factor, alpha-induced protein 2	14q32	1.70196	12.935	0.00171596
M28215_at	RAB5A	RAB5A, member RAS oncogene family	3p24-p22	1.69822	7.76507	0.00342906
U61981_at	MSH3	mutS homolog 3 (E. coli)	5q11-q12	1.69553	8.81324	0.000531952
M82809_at	ANXA4	annexin A4	2p13	1.69272	11.8833	0.00623735
L07594_at	TGFBR3	transforming growth factor, beta receptor III	1p33-p32	1.68427	9.71044	0.00453247
U57057_at	CORO2A	coronin, actin binding protein, 2A	9q22.3	1.6612	7.073	0.00888816
D31883_at	ABLIM1	actin binding LIM protein 1	10q25	1.63913	12.6409	0.000153386
HG4058-HT4328_at				1.62525	12.381	0.00745428
M29550_at	PPP3CB	protein phosphatase 3, catalytic subunit, beta isozyme	10q22.2	1.61858	8.72189	0.000300432
M29877_at	FUCA1	fucosidase, alpha-L- 1, tissue	1p34	1.58966	12.7507	0.000836221
M82882_at	ELF1	E74-like factor 1 (ets domain transcription factor)	13q13	1.58726	10.0352	0.00549228
D86957_at	SEPT8	septin 8	5q31	1.58288	11.4918	0.00298789
M20867_s_at	GLUD1	glutamate dehydrogenase 1	10q23.3	1.56249	9.75801	0.00145935
X58528_s_at	ABCD3	ATP-binding cassette, sub-family D (ALD), member 3	1p22-p21	1.5566	11.8876	0.00400367
D28589_at	KIAA0114	KIAA0114	4q12	1.53645	11.3862	0.00542754
L15409_at	VHL	von Hippel-Lindau tumor suppressor	3p25.3	1.53164	8.84454	0.0045059
X62535_at	DGKA	diacylglycerol kinase, alpha 80kDa	12q13.3	1.50603	11.4819	0.00235871
U09848_at	ZKSCAN1	zinc finger with KRAB and SCAN domains 1	7q22	1.49811	10.1116	7.92085e-05
U00115_at	BCL6	B-cell CLL/lymphoma 6	3q27	1.48661	11.4542	0.00863885
X59244_f_at	ZNF43	zinc finger protein 43	19p13.1-p12	1.48148	9.88263	0.00119003
U07620_at	MAPK10	mitogen-activated protein kinase 10	4q22.1-q23	1.47807	7.77205	0.000448558
D42084_at	METAP1	methionyl aminopeptidase 1	4q23	1.47211	12.9694	6.80094e-06
M38690_at	CD9	CD9 molecule	12p13.3	1.46613	13.9208	0.000495477
D38524_at	NT5C2	5'-nucleotidase, cytosolic II	10q24.32	1.45796	10.8376	0.000163822
X78669_at	RCN2	reticulocalbin 2, EF-hand calcium binding domain	15q23	1.45675	9.50031	0.00800878
U17714_at	ST13	suppression of tumorigenicity 13 (colon carcinoma) (Hsp70 interacting protein)	22q13.2	1.45335	7.456	0.000300432
S82470_at	MBOAT7	membrane bound O-acyltransferase domain containing 7	19q13.4	1.44722	12.1775	0.00111024
D49396_at	PRDX3	peroxiredoxin 3	10q25-q26	1.43699	11.6544	5.63531e-05
AC002073_cds1_at	PIK3IP1	phosphoinositide-3-kinase interacting protein 1	22q12.2	1.40107	8.91396	0.00341888
L11672_at	ZNF91	zinc finger protein 91	19p12	1.39229	13.3115	0.00385925
U65928_at	COPS5	COP9 constitutive photomorphogenic homolog subunit 5 (Arabidopsis)	8q13.1	1.38732	11.5257	0.00458656
M63256_at	CDR2	cerebellar degeneration-related protein 2, 62kDa	16p12.3	1.38622	7.8564	0.00739463
Z93784_at	ATXN10	ataxin 10	22q13.31	1.37638	10.5901	0.00816631
HG3342-HT3519_s_at				1.35467	15.2237	0.000865331
X96752_at	HADH	hydroxyacyl-CoA dehydrogenase	4q22-q26	1.33499	9.40964	0.00745428
D83004_at	UBE2N	ubiquitin-conjugating enzyme E2N (UBC13 homolog, yeast)	12q22	1.32673	11.9837	0.00767838
X14813_at	ACAA1	acetyl-CoA acyltransferase 1	3p23-p22	1.31149	11.7878	0.00126335
L09235_at	ATP6V1A	ATPase, H+ transporting, lysosomal 70kDa, V1 subunit A	3q13.31	1.30713	6.52047	0.00949438
X87176_at	HSD17B4	hydroxysteroid (17-beta) dehydrogenase 4	5q21	1.30282	10.1385	0.00181195
L28997_at	ARL1	ADP-ribosylation factor-like 1	12q23.2	1.28111	10.3619	0.000799414
M55543_at	GBP2	guanylate binding protein 2, interferon-inducible	1p22.2	1.27729	11.5284	0.000979503
L17128_at	GGCX	gamma-glutamyl carboxylase	2p12	1.26598	8.38924	0.00848528
D79999_at	PARP4	poly (ADP-ribose) polymerase family, member 4	13q11	1.23125	11.7245	8.82135e-05
X15949_at	IRF2	interferon regulatory factor 2	4q34.1-q35.1	1.22973	8.10254	0.00709393
U81006_at	TM9SF2	transmembrane 9 superfamily member 2	13q32.3	1.22396	11.0629	0.00688634
U05227_at	RAB40B	RAB40B, member RAS oncogene family	17q25.3	1.21332	8.61182	0.00325556
L20773_at				1.21326	11.0127	0.00385925
M65254_at	PPP2R1B	protein phosphatase 2, regulatory subunit A, beta	11q23.2	1.19797	7.56845	0.00970251
M22632_at	GOT2	glutamic-oxaloacetic transaminase 2, mitochondrial (aspartate aminotransferase 2)	16q21	1.19429	13.4289	0.00068965
U71300_at	SNAPC3	small nuclear RNA activating complex, polypeptide 3, 50kDa	9p22.3	1.18326	6.87436	0.00544927
U70063_at	ASAH1	N-acylsphingosine amidohydrolase (acid ceramidase) 1	8p22	1.18058	10.269	0.00414947
M69039_at	C1QBP	complement component 1, q subcomponent binding protein	17p13.3	1.15566	12.4441	0.00665371
D87684_at	UBXN4	UBX domain protein 4	2q21.3	1.14357	12.2424	0.00762306
S78085_at	PDCD2	programmed cell death 2	6q27	1.13397	7.85275	0.00863885
D83780_at	KIAA0196	KIAA0196	8q24.13	1.12649	8.91577	0.00745102
X12953_at	RAB2A	RAB2A, member RAS oncogene family	8q12.1	1.10663	9.3983	0.00414947
M99436_at	TLE2	transducin-like enhancer of split 2 (E(sp1) homolog, Drosophila)	19p13.3	1.08478	5.80338	0.0089469
D76444_at	RNF103	ring finger protein 103	2p11.2	1.07874	10.3407	0.00977834
X13794_rna1_at	LDHB	lactate dehydrogenase B	12p12.2-p12.1	1.06865	14.3888	0.00599187
J05448_at	POLR2C	polymerase (RNA) II (DNA directed) polypeptide C, 33kDa	16q13-q21	1.0646	10.3635	0.00067462
U68105_s_at	PABPC1	poly(A) binding protein, cytoplasmic 1	8q22.2-q23	1.05592	15.2245	0.000979503
D30756_at	NBR1	neighbor of BRCA1 gene 1	17q21.31	1.04222	10.5956	0.00863885
U20998_at	SRP9	signal recognition particle 9kDa	1q42.12	1.03158	14.3963	0.00762306
D50063_at	PSMD7	proteasome (prosome, macropain) 26S subunit, non-ATPase, 7	16q22.3	0.997503	11.8436	0.00305559
D13641_at	TOMM20	translocase of outer mitochondrial membrane 20 homolog (yeast)	1q42	0.99221	13.1955	0.00145935
M22760_at	COX5A	cytochrome c oxidase subunit Va	15q24.1	0.916404	13.7307	0.00204486
J04973_at	UQCRC2	ubiquinol-cytochrome c reductase core protein II	16p12	0.900783	12.8842	0.00528974
X12671_rna1_at	HNRNPA1	heterogeneous nuclear ribonucleoprotein A1	12q13.1	0.875835	14.6859	0.00791989
HG1515-HT1515_f_at				0.875768	14.3112	0.000929569
L39874_at	DCTD	dCMP deaminase	4q35.1	0.869225	11.3193	0.000853248
Y11306_rna1_at	TCF7L2	transcription factor 7-like 2 (T-cell specific, HMG-box)	10q25.3	0.867195	8.75743	0.00785677
D86967_at	EDEM1	ER degradation enhancer, mannosidase alpha-like 1	3p26.1	0.833185	10.727	0.00269671
X53777_at	RPL17	ribosomal protein L17	18q21	0.829369	15.7389	0.00450213
U00947_s_at	HNRNPA1	heterogeneous nuclear ribonucleoprotein A1	12q13.1	0.786104	15.0977	0.00647301
X75861_at	TMBIM6	transmembrane BAX inhibitor motif containing 6	12q12-q13	0.773502	14.1315	0.0086082
Z22535_at	BMPR1A	bone morphogenetic protein receptor, type IA	10q22.3	0.768834	7.32258	0.00513569
D13636_at	GTF3C2	general transcription factor IIIC, polypeptide 2, beta 110kDa	2p23.3	0.691833	10.7096	0.00945591
X03689_s_at	EEF1A1	eukaryotic translation elongation factor 1 alpha 1	6q14.1	0.615578	15.9258	0.00817945
HG662-HT662_at				0.605522	14.3865	0.00792104

## Sheet: SanchezC Invasive Up
ID	Symbol	Gene Title	Chromosome	logFC	AveExpr	adj.P.Val
202237_at	NNMT	nicotinamide N-methyltransferase	11q23.1	-3.46372	10.8511	4.59801e-14
204457_s_at	GAS1	growth arrest-specific 1	9q21.3-q22	-4.48995	7.53068	1.74911e-13
219561_at	COPZ2	coatomer protein complex, subunit zeta 2	17q21.32	-2.66079	7.9701	2.09686e-13
202988_s_at	RGS1	regulator of G-protein signaling 1	1q31	-3.99418	7.3235	2.09686e-13
202497_x_at	SLC2A3	solute carrier family 2 (facilitated glucose transporter), member 3	12p13.3	-3.11749	7.27099	2.12743e-13
202499_s_at	SLC2A3	solute carrier family 2 (facilitated glucose transporter), member 3	12p13.3	-3.26344	9.10092	3.82536e-13
201694_s_at	EGR1	early growth response 1	5q31.1	-2.58152	10.553	1.41428e-12
202238_s_at	NNMT	nicotinamide N-methyltransferase	11q23.1	-3.57926	9.55731	2.28027e-12
216834_at	RGS1	regulator of G-protein signaling 1	1q31	-3.85254	9.27998	2.53021e-12
212354_at	SULF1	sulfatase 1	8q13.1	-3.34098	9.28571	6.36295e-12
201615_x_at	CALD1	caldesmon 1	7q33	-3.0725	8.76042	6.48345e-12
202644_s_at	TNFAIP3	tumor necrosis factor, alpha-induced protein 3	6q23	-2.07469	10.151	1.52261e-11
217763_s_at	RAB31	RAB31, member RAS oncogene family	18p11.3	-2.15628	9.87309	4.67249e-11
211719_x_at	FN1	fibronectin 1	2q34	-2.74886	12.9697	7.01944e-11
201792_at	AEBP1	AE binding protein 1	7p13	-2.90589	9.61328	9.66603e-11
204345_at	COL16A1	collagen, type XVI, alpha 1	1p35-p34	-2.1955	9.52925	1.10085e-10
200906_s_at	PALLD	palladin, cytoskeletal associated protein	4q32.3	-2.47274	8.41579	1.20231e-10
209774_x_at	CXCL2	chemokine (C-X-C motif) ligand 2	4q21	-3.06307	8.29354	1.51208e-10
205249_at	EGR2	early growth response 2	10q21.1	-2.2987	7.67719	2.06038e-10
212414_s_at				-2.01291	8.1	2.44329e-10
201041_s_at	DUSP1	dual specificity phosphatase 1	5q34	-2.32695	12.1489	2.88275e-10
210495_x_at	FN1	fibronectin 1	2q34	-2.52883	13.1531	3.36597e-10
212464_s_at	FN1	fibronectin 1	2q34	-2.72673	12.4864	3.62201e-10
206025_s_at	TNFAIP6	tumor necrosis factor, alpha-induced protein 6	2q23.3	-2.63476	7.36745	3.8231e-10
204326_x_at	MT1X	metallothionein 1X	16q13	-2.59544	10.9898	4.35507e-10
205303_at	KCNJ8	potassium inwardly-rectifying channel, subfamily J, member 8	12p11.23	-1.91194	7.60118	4.82101e-10
208581_x_at	MT1X	metallothionein 1X	16q13	-2.89206	11.7412	5.27596e-10
202404_s_at	COL1A2	collagen, type I, alpha 2	7q22.1	-2.54724	12.3324	5.79721e-10
215198_s_at	CALD1	caldesmon 1	7q33	-2.13529	7.79765	5.79721e-10
210809_s_at	POSTN	periostin, osteoblast specific factor	13q13.3	-3.1568	10.6681	5.79721e-10
212353_at	SULF1	sulfatase 1	8q13.1	-2.41543	8.54367	6.19668e-10
209250_at	DEGS1	degenerative spermatocyte homolog 1, lipid desaturase (Drosophila)	1q42.11	-2.10342	9.04266	7.03876e-10
203753_at	TCF4	transcription factor 4	18q21.1	-1.61872	9.36059	7.80904e-10
216442_x_at	FN1	fibronectin 1	2q34	-2.49568	13.0585	7.80904e-10
202388_at	RGS2	regulator of G-protein signaling 2, 24kDa	1q31	-2.53918	10.7845	8.17502e-10
205666_at	FMO1	flavin containing monooxygenase 1	1q24.3	-2.99502	6.41396	9.24704e-10
222288_at				-3.82618	6.50085	9.87269e-10
203414_at	MMD	monocyte to macrophage differentiation-associated	17q	-2.07801	9.33981	1.32544e-09
206461_x_at	MT1H	metallothionein 1H	16q13	-2.7173	10.9906	1.40553e-09
217028_at	CXCR4	chemokine (C-X-C motif) receptor 4	2q21	-2.19445	9.55876	1.40553e-09
205525_at	CALD1	caldesmon 1	7q33	-1.95719	7.97162	1.55924e-09
218854_at	DSE	dermatan sulfate epimerase	6q22	-2.0822	8.04573	1.75385e-09
208636_at	ACTN1	actinin, alpha 1	14q22-q24	-1.70207	11.4429	1.85441e-09
213891_s_at	TCF4	transcription factor 4	18q21.1	-2.0069	9.52179	1.85441e-09
200797_s_at	MCL1	myeloid cell leukemia sequence 1 (BCL2-related)	1q21	-1.10864	12.5604	1.85893e-09
200897_s_at	PALLD	palladin, cytoskeletal associated protein	4q32.3	-2.20863	11.6585	2.33354e-09
202643_s_at	TNFAIP3	tumor necrosis factor, alpha-induced protein 3	6q23	-1.74478	8.6838	2.40002e-09
217764_s_at	RAB31	RAB31, member RAS oncogene family	18p11.3	-1.51561	10.7692	2.49787e-09
211161_s_at	COL3A1	collagen, type III, alpha 1	2q31	-2.24922	11.7938	2.49787e-09
209959_at	NR4A3	nuclear receptor subfamily 4, group A, member 3	9q22	-3.1274	7.31029	2.51869e-09
218469_at	GREM1	gremlin 1	15q13.3	-2.81341	8.55715	2.71327e-09
217165_x_at	MT1F	metallothionein 1F	16q13	-2.7815	9.6868	2.71327e-09
206571_s_at	MAP4K4	mitogen-activated protein kinase kinase kinase kinase 4	2q11.2-q12	-1.6809	8.86775	2.94426e-09
213275_x_at	CTSB	cathepsin B	8p22	-1.74763	11.4607	3.88132e-09
210511_s_at	INHBA	inhibin, beta A	7p15-p13	-3.07997	8.88163	3.90625e-09
219257_s_at	SPHK1	sphingosine kinase 1	17q25.2	-1.73495	8.76771	4.60306e-09
209955_s_at	FAP	fibroblast activation protein, alpha	2q23	-2.94959	7.47833	4.61577e-09
201389_at	ITGA5	integrin, alpha 5 (fibronectin receptor, alpha polypeptide)	12q11-q13	-1.77989	10.0735	4.8659e-09
216236_s_at				-1.9724	7.25544	4.97068e-09
213059_at	CREB3L1	cAMP responsive element binding protein 3-like 1	11p11.2	-2.41221	7.67097	5.29099e-09
207697_x_at	LILRB2	leukocyte immunoglobulin-like receptor, subfamily B (with TM and ITIM domains), member 2	19q13.4	-2.28094	7.44515	5.29099e-09
201739_at	SGK1	serum/glucocorticoid regulated kinase 1	6q23	-2.08596	10.8975	5.73246e-09
201616_s_at	CALD1	caldesmon 1	7q33	-2.8238	8.13605	6.13918e-09
200801_x_at	ACTB	actin, beta	7p22	-0.832001	15.2874	6.73305e-09
217762_s_at	RAB31	RAB31, member RAS oncogene family	18p11.3	-1.78823	10.7841	6.75996e-09
201289_at	CYR61	cysteine-rich, angiogenic inducer, 61	1p22.3	-2.30796	10.2857	7.12678e-09
201324_at	EMP1	epithelial membrane protein 1	12p12.3	-2.24879	10.0454	7.18784e-09
204472_at	GEM	GTP binding protein overexpressed in skeletal muscle	8q13-q21	-2.4621	8.82503	7.32767e-09
212185_x_at	MT2A	metallothionein 2A	16q13	-2.24737	12.7023	7.50897e-09
204211_x_at	EIF2AK2	eukaryotic translation initiation factor 2-alpha kinase 2	2p22-p21	-1.30671	7.98918	7.50897e-09
201464_x_at	JUN	jun proto-oncogene	1p32-p31	-1.57816	10.7983	7.87813e-09
201631_s_at	IER3	immediate early response 3	6p21.3	-1.87375	11.4019	8.00338e-09
221676_s_at	CORO1C	coronin, actin binding protein, 1C	12q24.1	-1.3589	9.67051	8.01366e-09
205207_at	IL6	interleukin 6 (interferon, beta 2)	7p21	-2.6075	8.60243	9.74097e-09
214056_at	MCL1	myeloid cell leukemia sequence 1 (BCL2-related)	1q21	-1.12915	8.41188	1.01174e-08
215199_at	CALD1	caldesmon 1	7q33	-2.55054	6.70167	1.0165e-08
203879_at	PIK3CD	phosphoinositide-3-kinase, catalytic, delta polypeptide	1p36.2	-1.74271	8.23904	1.16929e-08
212992_at	AHNAK2	AHNAK nucleoprotein 2	14q32.33	-2.67509	9.02744	1.35015e-08
203325_s_at	COL5A1	collagen, type V, alpha 1	9q34.2-q34.3	-2.21481	9.01981	1.49139e-08
215076_s_at	COL3A1	collagen, type III, alpha 1	2q31	-2.1866	12.9458	1.59012e-08
218330_s_at	NAV2	neuron navigator 2	11p15.1	-1.72768	8.493	1.78956e-08
209900_s_at	SLC16A1	solute carrier family 16, member 1 (monocarboxylic acid transporter 1)	1p12	-2.91413	6.76932	1.80338e-08
221729_at	COL5A2	collagen, type V, alpha 2	2q14-q32	-2.28632	10.3685	1.87445e-08
201466_s_at	JUN	jun proto-oncogene	1p32-p31	-2.11827	8.94764	1.87445e-08
201438_at	COL6A3	collagen, type VI, alpha 3	2q37	-2.05876	11.8977	1.93808e-08
207571_x_at	C1orf38	chromosome 1 open reading frame 38	1p35.3	-1.70717	7.99611	2.31587e-08
203700_s_at	DIO2	deiodinase, iodothyronine, type II	14q24.2-q24.3	-1.64472	7.42711	2.32833e-08
209118_s_at	TUBA1A	tubulin, alpha 1a	12q13.12	-2.13158	11.4715	2.56589e-08
205100_at	GFPT2	glutamine-fructose-6-phosphate transaminase 2	5q34-q35	-1.81875	8.03642	2.75748e-08
201560_at	CLIC4	chloride intracellular channel 4	1p36.11	-2.20913	9.92012	2.91402e-08
204619_s_at	VCAN	versican	5q14.3	-2.39805	8.2168	2.94341e-08
221730_at	COL5A2	collagen, type V, alpha 2	2q14-q32	-2.56348	9.30631	3.0217e-08
220088_at	C5AR1	complement component 5a receptor 1	19q13.3-q13.4	-2.00552	7.70921	3.11525e-08
205828_at	MMP3	matrix metallopeptidase 3 (stromelysin 1, progelatinase)	11q22.3	-2.61435	7.78916	3.30324e-08
202679_at	NPC1	Niemann-Pick disease, type C1	18q11-q12	-1.08536	9.27017	3.36505e-08
203066_at	CHST15	carbohydrate (N-acetylgalactosamine 4-sulfate 6-O) sulfotransferase 15	10q26	-1.86726	8.04436	3.51134e-08
213867_x_at	ACTB	actin, beta	7p22	-0.78948	15.3451	3.51134e-08
201645_at	TNC	tenascin C	9q33	-2.64556	8.45266	3.62111e-08
211596_s_at	LRIG1	leucine-rich repeats and immunoglobulin-like domains 1	3p14	-2.32479	7.28007	3.79719e-08
219087_at	ASPN	asporin	9q22	-2.99318	8.4382	3.97366e-08
215062_at				-1.34115	7.43268	4.00592e-08
202664_at	WIPF1	WAS/WASL interacting protein family, member 1	2q31.1	-2.17849	7.87838	4.04908e-08
200702_s_at	DDX24	DEAD (Asp-Glu-Ala-Asp) box polypeptide 24	14q32	-2.88132	7.04593	4.04908e-08
201693_s_at	EGR1	early growth response 1	5q31.1	-2.02641	8.59812	4.13438e-08
213790_at	ADAM12	ADAM metallopeptidase domain 12	10q26.3	-2.10889	7.56848	4.26827e-08
202403_s_at	COL1A2	collagen, type I, alpha 2	7q22.1	-1.85532	13.3123	4.35183e-08
204745_x_at	MT1G	metallothionein 1G	16q13	-1.75782	10.8215	4.48052e-08
204570_at	COX7A1	cytochrome c oxidase subunit VIIa polypeptide 1 (muscle)	19q13.1	-2.08194	8.74504	4.52809e-08
218223_s_at	PLEKHO1	pleckstrin homology domain containing, family O member 1	1q21.2	-1.65998	8.58803	5.2012e-08
203662_s_at	TMOD1	tropomodulin 1	9q22.3	-2.4386	6.41403	5.38725e-08
219179_at	DACT1	dapper, antagonist of beta-catenin, homolog 1 (Xenopus laevis)	14q23.1	-1.93439	7.12829	5.42116e-08
202132_at	WWTR1	WW domain containing transcription regulator 1	3q23-q24	-1.64394	7.89916	5.44708e-08
201761_at	MTHFD2	methylenetetrahydrofolate dehydrogenase (NADP+ dependent) 2, methenyltetrahydrofolate cyclohydrolase	2p13.1	-1.37761	10.0228	5.53601e-08
202202_s_at	LAMA4	laminin, alpha 4	6q21	-1.36848	8.95527	5.83941e-08
209795_at	CD69	CD69 molecule	12p13	-1.82639	7.26376	5.8461e-08
203083_at	THBS2	thrombospondin 2	6q27	-2.14509	10.8676	5.98324e-08
214508_x_at	CREM	cAMP responsive element modulator	10p11.21	-1.42457	8.18518	6.18019e-08
216336_x_at				-1.98859	10.1721	6.22375e-08
203044_at	CHSY1	chondroitin sulfate synthase 1	15q26.3	-1.12744	9.73699	6.64573e-08
211456_x_at	MT1P2	metallothionein 1 pseudogene 2	1q43	-2.20941	11.1146	6.64573e-08
202087_s_at	CTSL1	cathepsin L1	9q21.33	-1.46981	11.0717	6.93375e-08
212859_x_at	MT1E	metallothionein 1E	16q13	-2.24813	10.9259	7.40934e-08
208092_s_at	FAM49A	family with sequence similarity 49, member A	2p24.2	-1.14597	7.8712	7.98315e-08
205798_at	IL7R	interleukin 7 receptor	5p13	-2.21077	7.83814	8.3944e-08
219778_at	ZFPM2	zinc finger protein, multitype 2	8q23	-2.20703	6.89535	8.47245e-08
201266_at	TXNRD1	thioredoxin reductase 1	12q23-q24.1	-1.17848	9.78269	8.50033e-08
213943_at	TWIST1	twist homolog 1 (Drosophila)	7p21.2	-1.76609	7.79164	8.68286e-08
201109_s_at	THBS1	thrombospondin 1	15q15	-2.58714	8.2894	8.68286e-08
205559_s_at	PCSK5	proprotein convertase subtilisin/kexin type 5	9q21.3	-1.81927	7.29101	8.73376e-08
213010_at	PRKCDBP	protein kinase C, delta binding protein	11p15.4	-1.99077	8.07709	9.43166e-08
207191_s_at	ISLR	immunoglobulin superfamily containing leucine-rich repeat	15q23-q24	-1.96978	8.10637	9.45151e-08
221731_x_at	VCAN	versican	5q14.3	-2.16101	11.2764	9.77562e-08
201506_at	TGFBI	transforming growth factor, beta-induced, 68kDa	5q31	-1.994	11.5386	1.00957e-07
209101_at	CTGF	connective tissue growth factor	6q23.1	-2.53713	10.0653	1.01158e-07
218901_at	PLSCR4	phospholipid scramblase 4	3q24	-2.24238	7.43567	1.01342e-07
210764_s_at	CYR61	cysteine-rich, angiogenic inducer, 61	1p22.3	-2.37558	9.84208	1.03224e-07
206026_s_at	TNFAIP6	tumor necrosis factor, alpha-induced protein 6	2q23.3	-1.75128	7.68846	1.10452e-07
202719_s_at	TES	testis derived transcript (3 LIM domains)	7q31.2	-1.13271	8.81148	1.16404e-07
209170_s_at	GPM6B	glycoprotein M6B	Xp22.2	-2.76016	6.74583	1.17422e-07
222146_s_at	TCF4	transcription factor 4	18q21.1	-1.63346	8.34754	1.17422e-07
216005_at	TNC	tenascin C	9q33	-1.91495	7.35279	1.18539e-07
213716_s_at	SECTM1	secreted and transmembrane 1	17q25	-1.74548	7.90906	1.22775e-07
217967_s_at	FAM129A	family with sequence similarity 129, member A	1q25	-1.86589	9.45927	1.23499e-07
201559_s_at	CLIC4	chloride intracellular channel 4	1p36.11	-1.84868	7.32791	1.28866e-07
205941_s_at	COL10A1	collagen, type X, alpha 1	6q21-q22	-2.43234	8.12988	1.31179e-07
215051_x_at	AIF1	allograft inflammatory factor 1	6p21.3	-2.63315	8.47201	1.39876e-07
212077_at	CALD1	caldesmon 1	7q33	-1.98989	11.2332	1.39876e-07
210180_s_at	TRA2B	transformer 2 beta homolog (Drosophila)	3q26.2-q27	-2.49115	6.64724	1.40166e-07
205547_s_at	TAGLN	transgelin	11q23.2	-2.78905	11.4358	1.40166e-07
217739_s_at	NAMPT	nicotinamide phosphoribosyltransferase	7q22.3	-1.36665	9.98326	1.41048e-07
208747_s_at	C1S	complement component 1, s subcomponent	12p13	-2.19573	11.2564	1.4208e-07
202555_s_at	MYLK	myosin light chain kinase	3q21	-2.9969	10.111	1.44202e-07
203973_s_at	CEBPD	CCAAT/enhancer binding protein (C/EBP), delta	8p11.2-p11.1	-0.982666	12.0237	1.53545e-07
213543_at	SGCD	sarcoglycan, delta (35kDa dystrophin-associated glycoprotein)	5q33-q34	-2.59414	6.23165	1.53625e-07
212365_at	MYO1B	myosin IB	2q12-q34	-1.1411	8.8844	1.60378e-07
202766_s_at	FBN1	fibrillin 1	15q21.1	-2.33105	9.79399	1.60378e-07
200907_s_at	PALLD	palladin, cytoskeletal associated protein	4q32.3	-2.24441	10.1514	1.64379e-07
202156_s_at	CELF2	CUGBP, Elav-like family member 2	10p13	-1.86706	6.90732	1.66279e-07
204347_at	AK4	adenylate kinase 4	1p31.3	-1.88417	6.86605	1.70979e-07
222027_at	NUCKS1	nuclear casein kinase and cyclin-dependent kinase substrate 1	1q32.1	-1.33325	7.46141	1.7986e-07
212344_at	SULF1	sulfatase 1	8q13.1	-2.392	7.91388	1.80271e-07
38037_at	HBEGF	heparin-binding EGF-like growth factor	5q23	-1.64931	8.13381	1.80836e-07
209933_s_at	CD300A	CD300a molecule	17q25.1	-1.8407	7.40348	1.82445e-07
200989_at	HIF1A	hypoxia inducible factor 1, alpha subunit (basic helix-loop-helix transcription factor)	14q23.2	-1.06805	12.0155	1.82445e-07
206359_at	SOCS3	suppressor of cytokine signaling 3	17q25.3	-2.17054	7.32244	1.90214e-07
213056_at	FRMD4B	FERM domain containing 4B	3p14.1	-1.23378	7.36594	1.94765e-07
202443_x_at	NOTCH2	notch 2	1p13-p11	-0.858801	10.0254	1.94807e-07
201325_s_at	EMP1	epithelial membrane protein 1	12p12.3	-2.3982	8.80134	1.94807e-07
204017_at	KDELR3	KDEL (Lys-Asp-Glu-Leu) endoplasmic reticulum protein retention receptor 3	22q13.1	-1.42064	9.12434	2.05765e-07
204140_at	TPST1	tyrosylprotein sulfotransferase 1	7q11.21	-1.20355	8.97846	2.08024e-07
212027_at	RBM25	RNA binding motif protein 25	14q24.3	-1.38993	8.94093	2.24023e-07
214298_x_at	SEPT6	septin 6	Xq24	-1.22624	7.94504	2.28433e-07
201843_s_at	EFEMP1	EGF-containing fibulin-like extracellular matrix protein 1	2p16	-2.52242	6.91774	2.32043e-07
209606_at	CYTIP	cytohesin 1 interacting protein	2q11.2	-1.43834	7.25174	2.57993e-07
201939_at	PLK2	polo-like kinase 2	5q12.1-q13.2	-1.77366	8.37729	2.60686e-07
212012_at	PXDN	peroxidasin homolog (Drosophila)	2p25	-1.40988	10.0344	2.60686e-07
208782_at	FSTL1	follistatin-like 1	3q13.33	-1.29754	11.997	2.61229e-07
213274_s_at	CTSB	cathepsin B	8p22	-1.23123	9.57158	2.62049e-07
206584_at	LY96	lymphocyte antigen 96	8q21.11	-2.17745	7.97212	2.84473e-07
201105_at	LGALS1	lectin, galactoside-binding, soluble, 1	22q13.1	-1.95992	12.9547	2.96913e-07
204620_s_at	VCAN	versican	5q14.3	-1.87243	10.5304	3.04647e-07
218088_s_at	RRAGC	Ras-related GTP binding C	1p34	-0.810151	10.583	3.08979e-07
206414_s_at	ASAP2	ArfGAP with SH3 domain, ankyrin repeat and PH domain 2	2p24	-1.18037	9.17523	3.29147e-07
201859_at	SRGN	serglycin	10q22.1	-1.85652	10.409	3.30606e-07
204604_at	CDK14	cyclin-dependent kinase 14	7q21-q22	-1.63222	8.37614	3.43862e-07
205859_at	LY86	lymphocyte antigen 86	6p25.1	-1.16302	8.35377	3.50308e-07
213566_at	RNASE6	ribonuclease, RNase A family, k6	14q11.2	-2.09548	7.47607	3.60163e-07
203828_s_at	IL32	interleukin 32	16p13.3	-2.62235	7.12628	3.69827e-07
212489_at	COL5A1	collagen, type V, alpha 1	9q34.2-q34.3	-1.95309	8.66154	3.75324e-07
213003_s_at	CEBPD	CCAAT/enhancer binding protein (C/EBP), delta	8p11.2-p11.1	-1.24257	7.56468	3.82029e-07
217875_s_at	PMEPA1	prostate transmembrane protein, androgen induced 1	20q13.31-q13.33	-2.4856	8.0179	3.89313e-07
201744_s_at	LUM	lumican	12q21.3-q22	-2.15499	10.9229	3.93484e-07
210139_s_at	PMP22	peripheral myelin protein 22	17p12	-2.19396	10.3487	3.99596e-07
212915_at	PDZRN3	PDZ domain containing ring finger 3	3p13	-2.60977	7.05955	4.09131e-07
208763_s_at	TSC22D3	TSC22 domain family, member 3	Xq22.3	-1.2395	10.9913	4.12424e-07
200788_s_at	PEA15	phosphoprotein enriched in astrocytes 15	1q21.1	-0.917442	11.5171	4.22182e-07
204589_at	NUAK1	NUAK family, SNF1-like kinase, 1	12q23.3	-1.60038	8.69127	4.40108e-07
204030_s_at	SCHIP1	schwannomin interacting protein 1	3q25.32-q25.33	-1.25546	8.38976	4.48526e-07
213113_s_at	SLC43A3	solute carrier family 43, member 3	11q11	-0.877918	9.43761	4.64703e-07
212013_at	PXDN	peroxidasin homolog (Drosophila)	2p25	-1.54668	9.95482	4.67416e-07
202234_s_at	SLC16A1	solute carrier family 16, member 1 (monocarboxylic acid transporter 1)	1p12	-2.05118	7.12893	4.67416e-07
213804_at	INPP5B	inositol polyphosphate-5-phosphatase, 75kDa	1p34	-1.16873	7.7699	4.91378e-07
204464_s_at	EDNRA	endothelin receptor type A	4q31.22	-1.49132	8.75132	5.03937e-07
203742_s_at	TDG	thymine-DNA glycosylase	12q24.1	-1.25827	8.31706	5.07873e-07
208370_s_at	RCAN1	regulator of calcineurin 1	21q22.1-q22.2	-1.29222	9.17218	5.20215e-07
212810_s_at	SLC1A4	solute carrier family 1 (glutamate/neutral amino acid transporter), member 4	2p15-p13	-1.00236	8.39412	5.5554e-07
200798_x_at	MCL1	myeloid cell leukemia sequence 1 (BCL2-related)	1q21	-1.14747	9.79255	5.58329e-07
220296_at	GALNT10	UDP-N-acetyl-alpha-D-galactosamine:polypeptide N-acetylgalactosaminyltransferase 10 (GalNAc-T10)	5q33.2	-1.30962	7.59623	5.70254e-07
218574_s_at	LMCD1	LIM and cysteine-rich domains 1	3p26-p24	-1.35472	9.33438	5.71871e-07
210201_x_at	BIN1	bridging integrator 1	2q14	-1.48335	9.05874	5.84671e-07
204334_at	KLF7	Kruppel-like factor 7 (ubiquitous)	2q32	-0.796699	9.11376	5.92149e-07
200982_s_at	ANXA6	annexin A6	5q33.1	-1.6531	8.98758	6.17368e-07
220244_at	LOH3CR2A	loss of heterozygosity, 3, chromosomal region 2, gene A	3p25.3	-1.27599	8.44585	6.338e-07
202565_s_at	SVIL	supervillin	10p11.2	-1.29799	10.0607	6.50848e-07
209747_at	TGFB3	transforming growth factor, beta 3	14q24	-1.54128	8.38326	7.15364e-07
201842_s_at	EFEMP1	EGF-containing fibulin-like extracellular matrix protein 1	2p16	-2.34611	9.06559	7.4983e-07
219183_s_at	CYTH4	cytohesin 4	22q12.3-q13.1	-1.46354	7.81039	7.50863e-07
212067_s_at	C1R	complement component 1, r subcomponent	12p13	-1.57585	10.6698	7.80622e-07
202437_s_at	CYP1B1	cytochrome P450, family 1, subfamily B, polypeptide 1	2p21	-2.41779	7.02604	7.89906e-07
37408_at	MRC2	mannose receptor, C type 2	17q23.2	-1.12907	10.2708	8.12392e-07
222379_at	KCNE4	potassium voltage-gated channel, Isk-related family, member 4	2q36.3	-1.98787	6.22773	8.16504e-07
204103_at	CCL4	chemokine (C-C motif) ligand 4	17q12	-1.83914	8.05357	8.42145e-07
204940_at	PLN	phospholamban	6q22.1	-2.70585	6.47032	8.42145e-07
215446_s_at	LOX	lysyl oxidase	5q23.2	-1.84637	7.8008	8.72418e-07
201110_s_at	THBS1	thrombospondin 1	15q15	-2.90764	8.37607	8.72418e-07
214057_at	MCL1	myeloid cell leukemia sequence 1 (BCL2-related)	1q21	-0.822398	8.74471	8.92321e-07
214604_at	HOXD11	homeobox D11	2q31.1	-1.6168	7.05569	8.92321e-07
201852_x_at	COL3A1	collagen, type III, alpha 1	2q31	-1.89563	12.621	8.92321e-07
204052_s_at	SFRP4	secreted frizzled-related protein 4	7p14.1	-2.39459	7.12138	9.38261e-07
205304_s_at	KCNJ8	potassium inwardly-rectifying channel, subfamily J, member 8	12p11.23	-2.04832	6.75166	9.39784e-07
217966_s_at	FAM129A	family with sequence similarity 129, member A	1q25	-1.7809	7.91107	9.6056e-07
202436_s_at	CYP1B1	cytochrome P450, family 1, subfamily B, polypeptide 1	2p21	-2.21122	8.54743	9.71062e-07
202729_s_at	LTBP1	latent transforming growth factor beta binding protein 1	2p22-p21	-1.52593	9.83471	9.76928e-07
210605_s_at	MFGE8	milk fat globule-EGF factor 8 protein	15q25	-1.43956	8.36606	9.85776e-07
214693_x_at				-1.82319	9.03006	9.85776e-07
219228_at	ZNF331	zinc finger protein 331	19q13.42	-0.956159	9.18692	9.85776e-07
202760_s_at	PALM2-AKAP2	PALM2-AKAP2 readthrough	9q31.3	-1.6692	7.41804	9.85776e-07
215049_x_at	CD163	CD163 molecule	12p13.3	-1.89617	9.45684	9.92896e-07
221881_s_at	CLIC4	chloride intracellular channel 4	1p36.11	-1.84013	6.52425	9.94916e-07
209945_s_at	GSK3B	glycogen synthase kinase 3 beta	3q13.3	-0.730807	9.35376	1.01654e-06
205609_at	ANGPT1	angiopoietin 1	8q23.1	-2.08373	6.65479	1.02236e-06
216248_s_at	NR4A2	nuclear receptor subfamily 4, group A, member 2	2q22-q23	-1.68903	8.09976	1.02236e-06
204938_s_at	PLN	phospholamban	6q22.1	-2.92675	6.30861	1.02236e-06
212570_at	ENDOD1	endonuclease domain containing 1	11q21	-0.832662	7.83058	1.06673e-06
204337_at	RGS4	regulator of G-protein signaling 4	1q23.3	-2.22391	7.14305	1.08736e-06
211067_s_at	GAS7	growth arrest-specific 7	17p13.1	-1.54521	7.21278	1.1041e-06
214439_x_at	BIN1	bridging integrator 1	2q14	-1.97202	8.31687	1.16772e-06
209687_at	CXCL12	chemokine (C-X-C motif) ligand 12	10q11.1	-2.873	7.64604	1.19507e-06
202450_s_at	CTSK	cathepsin K	1q21	-1.76074	10.447	1.21289e-06
37892_at	COL11A1	collagen, type XI, alpha 1	1p21	-3.47627	7.15164	1.22436e-06
210629_x_at	LST1	leukocyte specific transcript 1	6p21.3	-1.27775	7.94816	1.22436e-06
218486_at	KLF11	Kruppel-like factor 11	2p25	-1.20978	8.21474	1.23018e-06
209758_s_at	MFAP5	microfibrillar associated protein 5	12p13.1-p12.3	-1.56057	8.20015	1.23373e-06
218468_s_at	GREM1	gremlin 1	15q13.3	-2.1476	8.30366	1.27284e-06
208789_at	PTRF	polymerase I and transcript release factor	17q21.2	-1.74507	9.561	1.29559e-06
209395_at	CHI3L1	chitinase 3-like 1 (cartilage glycoprotein-39)	1q32.1	-3.63486	7.56947	1.32227e-06
209646_x_at	ALDH1B1	aldehyde dehydrogenase 1 family, member B1	9p11.1	-1.90031	6.91458	1.34298e-06
209563_x_at	CALM1	calmodulin 1 (phosphorylase kinase, delta)	14q24-q31	-0.69587	12.0659	1.3453e-06
203645_s_at	CD163	CD163 molecule	12p13.3	-1.76983	9.27917	1.35069e-06
218943_s_at	DDX58	DEAD (Asp-Glu-Ala-Asp) box polypeptide 58	9p12	-1.4723	7.93771	1.35349e-06
212082_s_at	MYL6	myosin, light chain 6, alkali, smooth muscle and non-muscle	12q13.2	-0.784795	13.9644	1.38943e-06
203886_s_at	FBLN2	fibulin 2	3p25.1	-2.63705	6.84568	1.39941e-06
207574_s_at	GADD45B	growth arrest and DNA-damage-inducible, beta	19p13.3	-1.60804	10.1664	1.40414e-06
209396_s_at	CHI3L1	chitinase 3-like 1 (cartilage glycoprotein-39)	1q32.1	-2.58994	8.70141	1.44167e-06
201431_s_at	DPYSL3	dihydropyrimidinase-like 3	5q32	-1.81908	9.47662	1.466e-06
209156_s_at	COL6A2	collagen, type VI, alpha 2	21q22.3	-2.11789	10.8117	1.5137e-06
202859_x_at	IL8	interleukin 8	4q13-q21	-2.83148	9.69666	1.52291e-06
209335_at	DCN	decorin	12q21.33	-2.06067	8.85898	1.55235e-06
204588_s_at	SLC7A7	solute carrier family 7 (cationic amino acid transporter, y+ system), member 7	14q11.2	-1.35034	8.5527	1.55621e-06
212764_at	ZEB1	zinc finger E-box binding homeobox 1	10p11.2	-1.87641	8.47658	1.55621e-06
202672_s_at	ATF3	activating transcription factor 3	1q32.3	-1.75698	10.1086	1.60961e-06
212803_at	NAB2	NGFI-A binding protein 2 (EGR1 binding protein 2)	12q13.3	-1.04644	7.96491	1.61795e-06
218193_s_at	GOLT1B	golgi transport 1B	12p12.1	-1.11536	8.73729	1.62424e-06
208780_x_at	VAPA	VAMP (vesicle-associated membrane protein)-associated protein A, 33kDa	18p11.22	-0.623	12.5366	1.6498e-06
222088_s_at				-1.77339	7.72611	1.6498e-06
204135_at	FILIP1L	filamin A interacting protein 1-like	3q12.1	-1.52157	9.47404	1.68904e-06
209012_at	TRIO	triple functional domain (PTPRF interacting)	5p15.2	-0.763909	8.49974	1.68998e-06
209465_x_at	PTN	pleiotrophin	7q33	-2.63956	7.32307	1.69642e-06
203370_s_at	PDLIM7	PDZ and LIM domain 7 (enigma)	5q35.3	-1.5085	8.73661	1.70781e-06
201061_s_at	STOM	stomatin	9q34.1	-1.34571	11.1397	1.7182e-06
213071_at	DPT	dermatopontin	1q12-q23	-2.44933	7.08857	1.75135e-06
218871_x_at	CSGALNACT2	chondroitin sulfate N-acetylgalactosaminyltransferase 2	10q11.21	-1.29077	7.67896	1.75135e-06
213869_x_at	THY1	Thy-1 cell surface antigen	11q23.3	-1.14431	9.73032	1.76926e-06
202283_at	SERPINF1	serpin peptidase inhibitor, clade F (alpha-2 antiplasmin, pigment epithelium derived factor), member 1	17p13.1	-1.77852	10.6018	1.77423e-06
218975_at	COL5A3	collagen, type V, alpha 3	19p13.2	-1.54137	7.14315	1.78717e-06
212488_at	COL5A1	collagen, type V, alpha 1	9q34.2-q34.3	-1.67026	10.247	1.79055e-06
209621_s_at	PDLIM3	PDZ and LIM domain 3	4q35	-2.29573	8.76596	1.79055e-06
202207_at	ARL4C	ADP-ribosylation factor-like 4C	2q37.1	-1.43629	9.10611	1.79721e-06
205226_at	PDGFRL	platelet-derived growth factor receptor-like	8p22-p21.3	-1.49267	7.14404	1.82963e-06
213338_at	TMEM158	transmembrane protein 158 (gene/pseudogene)	3p21.3	-2.33596	7.73225	1.86514e-06
209191_at	TUBB6	tubulin, beta 6	18p11.21	-1.60009	10.3698	1.88206e-06
209723_at	SERPINB9	serpin peptidase inhibitor, clade B (ovalbumin), member 9	6p25	-1.50817	8.18625	1.90719e-06
210170_at	PDLIM3	PDZ and LIM domain 3	4q35	-2.00607	7.13968	1.9101e-06
221541_at	CRISPLD2	cysteine-rich secretory protein LCCL domain containing 2	16q24.1	-1.68955	10.2391	1.91795e-06
209167_at	GPM6B	glycoprotein M6B	Xp22.2	-1.97276	7.09184	1.93462e-06
38487_at	STAB1	stabilin 1	3p21.1	-1.08655	10.4064	1.96183e-06
201108_s_at	THBS1	thrombospondin 1	15q15	-1.51279	8.61437	1.96849e-06
214752_x_at	FLNA	filamin A, alpha	Xq28	-1.60056	10.7635	1.97213e-06
201124_at	ITGB5	integrin, beta 5	3q21.2	-0.715666	8.45504	1.97213e-06
203382_s_at	APOE	apolipoprotein E	19q13.2	-1.8268	9.34752	2.01073e-06
213069_at	HEG1	HEG homolog 1 (zebrafish)	3q21.2	-1.28389	8.65851	2.01073e-06
202931_x_at	BIN1	bridging integrator 1	2q14	-1.61469	8.3568	2.01073e-06
204363_at	F3	coagulation factor III (thromboplastin, tissue factor)	1p22-p21	-2.7618	8.32293	2.05234e-06
218559_s_at	MAFB	v-maf musculoaponeurotic fibrosarcoma oncogene homolog B (avian)	20q11.2-q13.1	-1.57136	9.42421	2.05348e-06
202133_at	WWTR1	WW domain containing transcription regulator 1	3q23-q24	-1.72984	9.32845	2.13614e-06
203104_at	CSF1R	colony stimulating factor 1 receptor	5q32	-1.38157	7.89232	2.16541e-06
217546_at	MT1M	metallothionein 1M	16q13	-3.16442	5.98467	2.60529e-06
214435_x_at	RALA	v-ral simian leukemia viral oncogene homolog A (ras related)	7p15-p13	-1.0571	8.9988	2.71943e-06
213125_at	OLFML2B	olfactomedin-like 2B	1q23.3	-1.38401	8.31769	2.75669e-06
44673_at	SIGLEC1	sialic acid binding Ig-like lectin 1, sialoadhesin	20p13	-1.06756	8.13469	2.80324e-06
212609_s_at	AKT3	v-akt murine thymoma viral oncogene homolog 3 (protein kinase B, gamma)	1q44	-1.42572	7.91483	2.83733e-06
203708_at	PDE4B	phosphodiesterase 4B, cAMP-specific	1p31	-1.94111	7.29955	2.85576e-06
204912_at	IL10RA	interleukin 10 receptor, alpha	11q23	-1.0875	8.69155	2.91256e-06
212487_at	GPATCH8	G patch domain containing 8	17q21.31	-1.09036	8.62913	3.07319e-06
212233_at	MAP1B	microtubule-associated protein 1B	5q13	-1.69052	9.80623	3.09383e-06
212822_at	HEG1	HEG homolog 1 (zebrafish)	3q21.2	-1.10513	8.65911	3.09483e-06
204502_at	SAMHD1	SAM domain and HD domain 1	20pter-q12	-1.5389	7.12333	3.14596e-06
210785_s_at	C1orf38	chromosome 1 open reading frame 38	1p35.3	-1.04938	8.30415	3.17965e-06
213699_s_at	YWHAQ	tyrosine 3-monooxygenase/tryptophan 5-monooxygenase activation protein, theta polypeptide	2p25.1	-0.659648	13.155	3.21361e-06
202506_at	SSFA2	sperm specific antigen 2	2q31.3	-1.19633	8.84128	3.27645e-06
206227_at	CILP	cartilage intermediate layer protein, nucleotide pyrophosphohydrolase	15q22	-1.35836	8.51947	3.34215e-06
203761_at	SLA	Src-like-adaptor	8q22.3-qter	-1.44296	8.76939	3.40871e-06
206115_at	EGR3	early growth response 3	8p23-p21	-1.64503	7.45734	3.45742e-06
38964_r_at	WAS	Wiskott-Aldrich syndrome (eczema-thrombocytopenia)	Xp11.4-p11.21	-0.931338	9.40686	3.46408e-06
203455_s_at	SAT1	spermidine/spermine N1-acetyltransferase 1	Xp22.1	-1.06041	11.6457	3.47456e-06
209210_s_at	FERMT2	fermitin family member 2	14q22.1	-1.99453	9.59542	3.49486e-06
204114_at	NID2	nidogen 2 (osteonidogen)	14q22.1	-1.66477	8.03425	3.53315e-06
213413_at				-1.76887	7.71172	3.53315e-06
210251_s_at	RUFY3	RUN and FYVE domain containing 3	4q13.3	-1.16704	7.07018	3.55359e-06
34210_at	CD52	CD52 molecule	1p36	-2.45723	7.77087	3.86711e-06
213524_s_at	G0S2	G0/G1switch 2	1q32.2	-1.41188	9.32651	3.91948e-06
209542_x_at	IGF1	insulin-like growth factor 1 (somatomedin C)	12q23.2	-2.62184	6.71696	3.94447e-06
220272_at	BNC2	basonuclin 2	9p22.2	-1.21312	8.07398	3.95338e-06
204364_s_at	REEP1	receptor accessory protein 1	2p11.2	-2.29562	6.62708	3.98054e-06
213095_x_at	AIF1	allograft inflammatory factor 1	6p21.3	-2.38366	7.62452	3.98054e-06
36829_at	PER1	period homolog 1 (Drosophila)	17p13.1	-0.900124	9.50531	3.98054e-06
208875_s_at	PAK2	p21 protein (Cdc42/Rac)-activated kinase 2	3q29	-0.698857	8.41176	4.01936e-06
219181_at	LIPG	lipase, endothelial	18q21.1	-1.70234	7.29158	4.01936e-06
210757_x_at	DAB2	disabled homolog 2, mitogen-responsive phosphoprotein (Drosophila)	5p13	-1.01275	9.0352	4.07425e-06
202191_s_at	GAS7	growth arrest-specific 7	17p13.1	-1.38668	7.45972	4.19542e-06
205695_at	SDS	serine dehydratase	12q24.13	-1.43844	7.44921	4.20456e-06
204051_s_at	SFRP4	secreted frizzled-related protein 4	7p14.1	-1.94193	9.01896	4.26658e-06
52255_s_at	COL5A3	collagen, type V, alpha 3	19p13.2	-1.23762	8.4405	4.26658e-06
220232_at	SCD5	stearoyl-CoA desaturase 5	4q21.22	-1.48557	8.37101	4.33456e-06
213168_at	SP3	Sp3 transcription factor	2q31	-1.0621	9.42787	4.40587e-06
213262_at	SACS	spastic ataxia of Charlevoix-Saguenay (sacsin)	13q12	-1.89489	7.03625	4.46474e-06
212387_at	TCF4	transcription factor 4	18q21.1	-1.43578	8.43593	4.60038e-06
60471_at				-0.798879	8.64313	4.62001e-06
203225_s_at	RFK	riboflavin kinase	9q21.13	-0.993216	7.79162	4.69712e-06
209890_at	TSPAN5	tetraspanin 5	4q23	-1.44268	7.30489	4.7858e-06
209785_s_at	PLA2G4C	phospholipase A2, group IVC (cytosolic, calcium-independent)	19q13.3	-1.57334	7.74137	4.8885e-06
202952_s_at	ADAM12	ADAM metallopeptidase domain 12	10q26.3	-2.17427	6.82053	4.99454e-06
208964_s_at	FADS1	fatty acid desaturase 1	11q12.2-q13.1	-0.769209	9.43092	5.00123e-06
222294_s_at	RAB27A	RAB27A, member RAS oncogene family	15q15-q21.1	-1.02233	7.77635	5.05626e-06
221698_s_at	CLEC7A	C-type lectin domain family 7, member A	12p13.2	-1.68556	7.46053	5.08714e-06
201358_s_at	COPB1	coatomer protein complex, subunit beta 1	11p15.2	-0.64501	11.6184	5.09441e-06
209906_at	C3AR1	complement component 3a receptor 1	12p13.31	-1.29103	8.34246	5.11556e-06
221419_s_at				-1.04843	8.87644	5.12149e-06
205824_at	HSPB2	heat shock 27kDa protein 2	11q22-q23	-2.10559	5.85448	5.1413e-06
213422_s_at	MXRA8	matrix-remodelling associated 8	1p36.33	-1.22895	9.81882	5.42644e-06
201232_s_at	PSMD13	proteasome (prosome, macropain) 26S subunit, non-ATPase, 13	11p15.5	-0.735629	10.5648	5.44771e-06
205802_at	TRPC1	transient receptor potential cation channel, subfamily C, member 1	3q23	-1.85062	6.88692	5.47024e-06
200665_s_at	SPARC	secreted protein, acidic, cysteine-rich (osteonectin)	5q31.3-q32	-1.21793	12.6029	5.50432e-06
209568_s_at	RGL1	ral guanine nucleotide dissociation stimulator-like 1	1q25.3	-1.21302	8.92893	5.52773e-06
203777_s_at	RPS6KB2	ribosomal protein S6 kinase, 70kDa, polypeptide 2	11q13.2	-0.77764	8.2003	5.52773e-06
219134_at	ELTD1	EGF, latrophilin and seven transmembrane domain containing 1	1p33-p32	-1.61085	7.58913	5.66105e-06
204121_at	GADD45G	growth arrest and DNA-damage-inducible, gamma	9q22.1-q22.2	-1.97514	6.30614	5.74357e-06
212386_at	TCF4	transcription factor 4	18q21.1	-1.72901	9.44618	5.74357e-06
204802_at	RRAD	Ras-related associated with diabetes	16q22	-2.18843	6.20484	5.87561e-06
213982_s_at	RABGAP1L	RAB GTPase activating protein 1-like	1q24	-1.13183	8.24039	6.06117e-06
202376_at	SERPINA3	serpin peptidase inhibitor, clade A (alpha-1 antiproteinase, antitrypsin), member 3	14q32.1	-2.45233	8.17576	6.25139e-06
203060_s_at	PAPSS2	3'-phosphoadenosine 5'-phosphosulfate synthase 2	10q24	-1.78394	7.86088	6.3635e-06
208981_at	PECAM1	platelet/endothelial cell adhesion molecule	17q23	-1.02112	9.10727	6.4372e-06
213577_at	SQLE	squalene epoxidase	8q24.1	-1.67978	8.16587	6.44161e-06
205003_at	DOCK4	dedicator of cytokinesis 4	7q31.1	-1.18515	7.454	6.44161e-06
203878_s_at	MMP11	matrix metallopeptidase 11 (stromelysin 3)	22q11.2	-1.77864	9.30353	6.58358e-06
213281_at				-1.02967	7.84026	6.71161e-06
212887_at	SEC23A	Sec23 homolog A (S. cerevisiae)	14q21.1	-1.18359	8.67522	6.84414e-06
209304_x_at	GADD45B	growth arrest and DNA-damage-inducible, beta	19p13.3	-1.69429	9.33659	6.89807e-06
215222_x_at	MACF1	microtubule-actin crosslinking factor 1	1p32-p31	-1.03712	9.22762	7.0383e-06
202861_at	PER1	period homolog 1 (Drosophila)	17p13.1	-1.61372	8.10147	7.07991e-06
207610_s_at	EMR2	egf-like module containing, mucin-like, hormone receptor-like 2	19p13.1	-1.60807	6.82243	7.09724e-06
204059_s_at	ME1	malic enzyme 1, NADP(+)-dependent, cytosolic	6q12	-1.21646	7.82335	7.11331e-06
202948_at	IL1R1	interleukin 1 receptor, type I	2q12	-1.43853	9.69619	7.24778e-06
209496_at	RARRES2	retinoic acid receptor responder (tazarotene induced) 2	7q36.1	-2.04435	9.74623	7.3851e-06
213428_s_at	COL6A1	collagen, type VI, alpha 1	21q22.3	-1.71954	11.4152	7.41556e-06
220975_s_at	C1QTNF1	C1q and tumor necrosis factor related protein 1	17q25.3	-0.965159	8.66315	7.58875e-06
210895_s_at	CD86	CD86 molecule	3q21	-1.75344	6.66659	7.60823e-06
203477_at	COL15A1	collagen, type XV, alpha 1	9q21-q22	-1.55972	9.08655	7.61375e-06
209765_at	ADAM19	ADAM metallopeptidase domain 19	5q33.3	-1.80642	7.57111	7.61375e-06
219386_s_at	SLAMF8	SLAM family member 8	1q23.2	-1.68328	7.88003	7.61375e-06
205568_at	AQP9	aquaporin 9	15q	-1.83633	6.32167	7.62256e-06
205419_at	GPR183	G protein-coupled receptor 183	13q32.3	-1.90185	6.78772	7.66081e-06
212097_at	CAV1	caveolin 1, caveolae protein, 22kDa	7q31.1	-1.5893	10.36	7.87132e-06
218995_s_at	EDN1	endothelin 1	6p24.1	-1.97062	7.08313	7.94406e-06
210832_x_at	PTGER3	prostaglandin E receptor 3 (subtype EP3)	1p31.2	-1.21014	7.15389	8.0081e-06
203729_at	EMP3	epithelial membrane protein 3	19q13.3	-1.27729	9.26507	8.02703e-06
219666_at	MS4A6A	membrane-spanning 4-domains, subfamily A, member 6A	11q12.1	-1.44672	8.84522	8.1112e-06
218045_x_at	PTMS	parathymosin	12p13	-1.70099	6.87614	8.18128e-06
203508_at	TNFRSF1B	tumor necrosis factor receptor superfamily, member 1B	1p36.22	-1.18826	8.53924	8.31212e-06
204803_s_at	RRAD	Ras-related associated with diabetes	16q22	-2.07332	6.43218	8.34828e-06
206049_at	SELP	selectin P (granule membrane protein 140kDa, antigen CD62)	1q22-q25	-0.953007	8.50998	8.6343e-06
208131_s_at	PTGIS	prostaglandin I2 (prostacyclin) synthase	20q13.13	-2.07744	8.99008	8.6343e-06
220990_s_at				-0.927545	11.1459	9.00662e-06
214770_at	MSR1	macrophage scavenger receptor 1	8p22	-2.22264	6.59824	9.00662e-06
220610_s_at	LRRFIP2	leucine rich repeat (in FLII) interacting protein 2	3p22.2	-0.604977	8.28172	9.07373e-06
212190_at	SERPINE2	serpin peptidase inhibitor, clade E (nexin, plasminogen activator inhibitor type 1), member 2	2q33-q35	-1.61132	9.36932	9.09247e-06
202310_s_at	COL1A1	collagen, type I, alpha 1	17q21.33	-1.74606	12.5579	9.09673e-06
210986_s_at	TPM1	tropomyosin 1 (alpha)	15q22.1	-1.42263	12.1684	9.18643e-06
217878_s_at	CDC27	cell division cycle 27 homolog (S. cerevisiae)	17q21.32	-1.1724	7.45081	9.18643e-06
204359_at	FLRT2	fibronectin leucine rich transmembrane protein 2	14q24-q32	-1.85176	7.70666	9.4039e-06
218224_at	PNMA1	paraneoplastic antigen MA1	14q24.3	-1.18417	9.1466	9.54431e-06
213629_x_at	MT1F	metallothionein 1F	16q13	-1.13762	9.78166	9.69687e-06
218718_at	PDGFC	platelet derived growth factor C	4q32	-1.45397	9.35474	9.69815e-06
214121_x_at	PDLIM7	PDZ and LIM domain 7 (enigma)	5q35.3	-2.05169	5.89827	9.70235e-06
201169_s_at	BHLHE40	basic helix-loop-helix family, member e40	3p26	-2.0929	7.67877	9.75895e-06
221900_at	COL8A2	collagen, type VIII, alpha 2	1p34.2	-1.84364	6.28368	9.89873e-06
205114_s_at				-1.62726	8.08152	9.92497e-06
212836_at	POLD3	polymerase (DNA-directed), delta 3, accessory subunit	11q14	-0.769797	8.77997	9.97105e-06
207749_s_at	PPP2R3A	protein phosphatase 2, regulatory subunit B'', alpha	3q22.1	-0.912462	8.04118	9.98253e-06
209473_at	ENTPD1	ectonucleoside triphosphate diphosphohydrolase 1	10q24	-1.13418	9.5608	1.00296e-05
210644_s_at	LAIR1	leukocyte-associated immunoglobulin-like receptor 1	19q13.4	-0.816105	8.39417	1.02659e-05
203574_at	NFIL3	nuclear factor, interleukin 3 regulated	9q22	-1.16963	9.66265	1.02659e-05
205518_s_at	CMAH	cytidine monophosphate-N-acetylneuraminic acid hydroxylase (CMP-N-acetylneuraminate monooxygenase) pseudogene	6p21.32	-1.03136	7.58439	1.04048e-05
204320_at	COL11A1	collagen, type XI, alpha 1	1p21	-3.16363	6.90071	1.04058e-05
201125_s_at	ITGB5	integrin, beta 5	3q21.2	-0.914242	10.1095	1.09046e-05
201965_s_at	SETX	senataxin	9q34.13	-0.826663	8.39973	1.09046e-05
202896_s_at	SIRPA	signal-regulatory protein alpha	20p13	-0.798352	8.42068	1.09046e-05
214574_x_at	LST1	leukocyte specific transcript 1	6p21.3	-1.4576	7.93586	1.12076e-05
219520_s_at	WWC3	WWC family member 3	Xp22.32	-0.748577	9.31241	1.14092e-05
222158_s_at	PPPDE1	PPPDE peptidase domain containing 1	1q44	-2.0994	7.06833	1.16075e-05
202222_s_at	DES	desmin	2q35	-3.28849	9.13837	1.16643e-05
217579_x_at				-0.884841	8.77324	1.177e-05
201215_at	PLS3	plastin 3	Xq23	-0.964911	11.4479	1.18016e-05
202620_s_at	PLOD2	procollagen-lysine, 2-oxoglutarate 5-dioxygenase 2	3q24	-1.77008	9.28927	1.18031e-05
203820_s_at	IGF2BP3	insulin-like growth factor 2 mRNA binding protein 3	7p11	-2.0946	6.48118	1.18806e-05
204435_at	NUPL1	nucleoporin like 1	13q12.13	-0.917773	8.21419	1.21332e-05
209288_s_at	CDC42EP3	CDC42 effector protein (Rho GTPase binding) 3	2p21	-1.14993	7.92076	1.21735e-05
214845_s_at	CALU	calumenin	7q32.1	-1.29651	7.48098	1.21735e-05
204939_s_at	PLN	phospholamban	6q22.1	-2.77161	7.95916	1.22598e-05
202068_s_at	LDLR	low density lipoprotein receptor	19p13.3	-1.37819	9.66637	1.23688e-05
207876_s_at	FLNC	filamin C, gamma	7q32-q35	-1.69378	8.8118	1.25447e-05
201170_s_at	BHLHE40	basic helix-loop-helix family, member e40	3p26	-1.25393	10.859	1.255e-05
212813_at	JAM3	junctional adhesion molecule 3	11q25	-1.25645	9.05809	1.25591e-05
213939_s_at	RUFY3	RUN and FYVE domain containing 3	4q13.3	-1.1396	8.86791	1.29498e-05
202340_x_at	NR4A1	nuclear receptor subfamily 4, group A, member 1	12q13	-1.71737	9.10634	1.29498e-05
219358_s_at	ADAP2	ArfGAP with dual PH domains 2	17q11.2	-0.742246	8.62317	1.30549e-05
212851_at	DCUN1D4	DCN1, defective in cullin neddylation 1, domain containing 4 (S. cerevisiae)	4q12	-0.784661	8.33523	1.30886e-05
209230_s_at	NUPR1	nuclear protein, transcriptional regulator, 1	16p11.2	-1.39121	10.0518	1.30886e-05
220658_s_at	ARNTL2	aryl hydrocarbon receptor nuclear translocator-like 2	12p12.2-p11.2	-1.52365	7.49158	1.35004e-05
201893_x_at	DCN	decorin	12q21.33	-1.71981	11.6842	1.37563e-05
200755_s_at	CALU	calumenin	7q32.1	-1.54749	8.15937	1.38119e-05
201407_s_at	PPP1CB	protein phosphatase 1, catalytic subunit, beta isozyme	2p23	-0.874152	9.02908	1.38748e-05
211160_x_at	ACTN1	actinin, alpha 1	14q22-q24	-1.59149	9.72554	1.40858e-05
204622_x_at	NR4A2	nuclear receptor subfamily 4, group A, member 2	2q22-q23	-1.59894	7.701	1.40858e-05
212196_at	IL6ST	interleukin 6 signal transducer (gp130, oncostatin M receptor)	5q11	-1.32704	7.75684	1.43925e-05
204122_at	TYROBP	TYRO protein tyrosine kinase binding protein	19q13.1	-1.42695	9.59155	1.43925e-05
201294_s_at	WSB1	WD repeat and SOCS box-containing 1	17q11.1	-1.94955	8.13308	1.4489e-05
202157_s_at	CELF2	CUGBP, Elav-like family member 2	10p13	-1.1947	9.2647	1.48698e-05
215434_x_at				-1.55561	8.26849	1.48698e-05
211429_s_at	SERPINA1	serpin peptidase inhibitor, clade A (alpha-1 antiproteinase, antitrypsin), member 1	14q32.1	-1.92179	8.96327	1.48698e-05
220940_at	ANKRD36B	ankyrin repeat domain 36B	2q11.2	-1.55297	7.64354	1.49906e-05
205315_s_at	SNTB2	syntrophin, beta 2 (dystrophin-associated protein A1, 59kDa, basic component 2)	16q22.1	-0.656599	9.29593	1.50733e-05
215633_x_at	LST1	leukocyte specific transcript 1	6p21.3	-1.73677	6.87275	1.52688e-05
204881_s_at	UGCG	UDP-glucose ceramide glucosyltransferase	9q31	-1.69953	8.38875	1.53128e-05
212377_s_at	NOTCH2	notch 2	1p13-p11	-0.745702	9.53648	1.53711e-05
201737_s_at	MARCH6	membrane-associated ring finger (C3HC4) 6	5p15.2	-1.35861	8.83047	1.53722e-05
203474_at	IQGAP2	IQ motif containing GTPase activating protein 2	5q13.3	-1.13991	7.4182	1.55525e-05
203561_at	FCGR2A	Fc fragment of IgG, low affinity IIa, receptor (CD32)	1q23	-1.44756	8.36098	1.58739e-05
56256_at	SIDT2	SID1 transmembrane family, member 2	11q23.3	-0.822894	9.69442	1.58951e-05
202379_s_at	NKTR	natural killer-tumor recognition sequence	3p23-p21	-1.54478	9.88864	1.58987e-05
215387_x_at				-0.980771	8.06707	1.59519e-05
211535_s_at	FGFR1	fibroblast growth factor receptor 1	8p12	-1.34501	8.73126	1.60843e-05
209721_s_at	IFFO1	intermediate filament family orphan 1	12p13.3	-0.939699	8.77692	1.62745e-05
213765_at	MFAP5	microfibrillar associated protein 5	12p13.1-p12.3	-1.66828	6.93704	1.62745e-05
221748_s_at	TNS1	tensin 1	2q35-q36	-1.89068	10.4766	1.63271e-05
212587_s_at	PTPRC	protein tyrosine phosphatase, receptor type, C	1q31-q32	-2.4093	6.93816	1.63271e-05
203543_s_at	KLF9	Kruppel-like factor 9	9q13	-2.1886	6.3963	1.6373e-05
219392_x_at	PRR11	proline rich 11	17q22	-0.937653	11.4553	1.65165e-05
211074_at	FOLR1	folate receptor 1 (adult)	11q13.3-q14.1	-1.59061	7.92211	1.66348e-05
219519_s_at	SIGLEC1	sialic acid binding Ig-like lectin 1, sialoadhesin	20p13	-2.28303	5.912	1.66803e-05
216153_x_at	RECK	reversion-inducing-cysteine-rich protein with kazal motifs	9p13.3	-1.20814	9.31667	1.70232e-05
203817_at	GUCY1B3	guanylate cyclase 1, soluble, beta 3	4q31.3-q33	-1.38031	7.66486	1.70799e-05
201887_at	IL13RA1	interleukin 13 receptor, alpha 1	Xq24	-0.612329	10.0128	1.70799e-05
217428_s_at	COL10A1	collagen, type X, alpha 1	6q21-q22	-2.38256	6.53241	1.73664e-05
205786_s_at	ITGAM	integrin, alpha M (complement component 3 receptor 3 subunit)	16p11.2	-1.3497	7.49978	1.73669e-05
218781_at	SMC6	structural maintenance of chromosomes 6	2p24.2	-0.701573	8.7332	1.75513e-05
219451_at	MSRB2	methionine sulfoxide reductase B2	10p12	-1.26403	7.74767	1.75513e-05
209283_at	CRYAB	crystallin, alpha B	11q22.3-q23.1	-1.61926	8.88889	1.7814e-05
213032_at	NFIB	nuclear factor I/B	9p24.1	-2.07135	7.27909	1.78454e-05
220287_at	ADAMTS9	ADAM metallopeptidase with thrombospondin type 1 motif, 9	3p14.1	-1.03023	8.37883	1.78495e-05
200600_at	MSN	moesin	Xq11.1	-1.22079	9.99788	1.79416e-05
209879_at	SELPLG	selectin P ligand	12q24	-1.15365	8.27218	1.80391e-05
202291_s_at	MGP	matrix Gla protein	12p12.3	-1.90456	11.4035	1.86552e-05
204141_at	TUBB2A	tubulin, beta 2A	6p25	-1.61853	10.4511	1.86552e-05
202311_s_at	COL1A1	collagen, type I, alpha 1	17q21.33	-1.71704	8.89721	1.86649e-05
218268_at	TBC1D15	TBC1 domain family, member 15	12q21.1	-0.74173	9.10556	1.88403e-05
212110_at	SLC39A14	solute carrier family 39 (zinc transporter), member 14	8p21.3	-1.06194	9.623	1.89189e-05
202013_s_at	EXT2	exostosin 2	11p12-p11	-0.649466	8.34163	1.89266e-05
213457_at	MFHAS1	malignant fibrous histiocytoma amplified sequence 1	8p23.1	-1.53688	6.80762	1.9024e-05
202270_at	GBP1	guanylate binding protein 1, interferon-inducible, 67kDa	1p22.2	-1.68364	8.53163	1.90832e-05
201333_s_at	ARHGEF12	Rho guanine nucleotide exchange factor (GEF) 12	11q23.3	-0.761692	7.87455	1.92405e-05
204575_s_at	MMP19	matrix metallopeptidase 19	12q14	-1.47012	8.19811	1.95427e-05
203300_x_at	AP1S2	adaptor-related protein complex 1, sigma 2 subunit	Xp22.2	-1.31101	7.73693	1.96165e-05
200043_at	ERH	enhancer of rudimentary homolog (Drosophila)	14q24.1	-0.734961	11.5055	1.98317e-05
202236_s_at	SLC16A1	solute carrier family 16, member 1 (monocarboxylic acid transporter 1)	1p12	-1.15622	7.92324	1.98452e-05
204774_at	EVI2A	ecotropic viral integration site 2A	17q11.2	-1.31938	7.69481	2.02119e-05
203910_at	ARHGAP29	Rho GTPase activating protein 29	1p22.1	-1.51885	8.92358	2.02119e-05
204629_at	PARVB	parvin, beta	22q13.2-q13.33	-0.749383	8.35205	2.05999e-05
201502_s_at	NFKBIA	nuclear factor of kappa light polypeptide gene enhancer in B-cells inhibitor, alpha	14q13	-1.02825	12.0023	2.06162e-05
201602_s_at	PPP1R12A	protein phosphatase 1, regulatory (inhibitor) subunit 12A	12q15-q21	-2.00358	7.05023	2.06897e-05
203903_s_at	HEPH	hephaestin	Xq11-q12	-1.48596	7.86028	2.07442e-05
202897_at	SIRPA	signal-regulatory protein alpha	20p13	-0.92455	8.32542	2.08798e-05
204222_s_at	GLIPR1	GLI pathogenesis-related 1	12q21.2	-1.46099	7.36693	2.10559e-05
208851_s_at	THY1	Thy-1 cell surface antigen	11q23.3	-0.943052	9.9942	2.13321e-05
202935_s_at	SOX9	SRY (sex determining region Y)-box 9	17q23	-1.89392	7.82704	2.13789e-05
209272_at	NAB1	NGFI-A binding protein 1 (EGR1 binding protein 1)	2q32.3-q33	-0.975283	9.30576	2.18519e-05
220072_at	CSPP1	centrosome and spindle pole associated protein 1	8q13.2	-1.25712	7.7369	2.1876e-05
209901_x_at	AIF1	allograft inflammatory factor 1	6p21.3	-2.20255	7.50023	2.19212e-05
213689_x_at	FAM69A	family with sequence similarity 69, member A	1p22.1	-0.907523	8.84451	2.2073e-05
211582_x_at	LST1	leukocyte specific transcript 1	6p21.3	-1.56989	7.23145	2.21549e-05
218870_at	ARHGAP15	Rho GTPase activating protein 15	2q22.2-q22.3	-1.53867	7.0522	2.22948e-05
203835_at	LRRC32	leucine rich repeat containing 32	11q13.5-q14	-1.5878	7.60198	2.23493e-05
214181_x_at	LST1	leukocyte specific transcript 1	6p21.3	-1.70077	6.81102	2.24386e-05
216044_x_at	FAM69A	family with sequence similarity 69, member A	1p22.1	-0.853673	8.21621	2.24386e-05
211040_x_at	GTSE1	G-2 and S-phase expressed 1	22q13.2-q13.3	-0.730336	10.6563	2.2627e-05
205479_s_at	PLAU	plasminogen activator, urokinase	10q24	-1.46133	10.2512	2.26937e-05
211499_s_at	MAPK11	mitogen-activated protein kinase 11	22q13.33	-1.02915	7.89878	2.30787e-05
213909_at	LRRC15	leucine rich repeat containing 15	3q29	-1.57614	8.11011	2.36192e-05
202974_at	MPP1	membrane protein, palmitoylated 1, 55kDa	Xq28	-1.11014	8.09675	2.37145e-05
203675_at	NUCB2	nucleobindin 2	11p15.1	-0.977184	8.81225	2.37228e-05
220617_s_at	ZNF532	zinc finger protein 532	18q21.32	-1.23936	8.62626	2.39202e-05
206792_x_at	PDE4C	phosphodiesterase 4C, cAMP-specific	19p13.11	-0.840597	12.3123	2.42337e-05
204661_at	CD52	CD52 molecule	1p36	-2.13778	7.62092	2.43645e-05
201647_s_at	SCARB2	scavenger receptor class B, member 2	4q21.1	-0.725932	7.97318	2.45261e-05
221112_at	IL1RAPL2	interleukin 1 receptor accessory protein-like 2	Xq22	-1.25917	6.8022	2.45739e-05
209340_at	UAP1	UDP-N-acteylglucosamine pyrophosphorylase 1	1q23.3	-0.98714	9.7759	2.50581e-05
212985_at	APBB2	amyloid beta (A4) precursor protein-binding, family B, member 2	4p13	-0.827065	7.9341	2.51364e-05
204068_at	STK3	serine/threonine kinase 3	8q22.2	-1.00804	8.91584	2.54243e-05
212589_at	RRAS2	related RAS viral (r-ras) oncogene homolog 2	11p15.2	-0.797282	8.95694	2.56939e-05
206323_x_at	OPHN1	oligophrenin 1	Xq12	-0.932482	11.2828	2.57462e-05
214052_x_at	BAT2L2	HLA-B associated transcript 2-like 2	1q23.3	-1.10881	7.76036	2.57462e-05
212843_at	NCAM1	neural cell adhesion molecule 1	11q23.1	-2.01969	7.39401	2.63486e-05
214909_s_at	DDAH2	dimethylarginine dimethylaminohydrolase 2	6p21.3	-0.923867	8.91558	2.64307e-05
203951_at	CNN1	calponin 1, basic, smooth muscle	19p13.2-p13.1	-2.64318	9.3762	2.67071e-05
202036_s_at	SFRP1	secreted frizzled-related protein 1	8p11.21	-2.33117	6.28174	2.67298e-05
212917_x_at	RECQL	RecQ protein-like (DNA helicase Q1-like)	12p12	-1.34836	7.85619	2.71107e-05
221745_at	DCAF7	DDB1 and CUL4 associated factor 7	17q23.3	-1.57092	7.29724	2.73797e-05
219836_at	ZBED2	zinc finger, BED-type containing 2	3q13.2	-1.89361	7.08808	2.74478e-05
212481_s_at	TPM4	tropomyosin 4	19p13.1	-0.845125	9.86881	2.74478e-05
219390_at	FKBP14	FK506 binding protein 14, 22 kDa	7p14.3	-0.930917	7.35239	2.74478e-05
57588_at	SLC24A3	solute carrier family 24 (sodium/potassium/calcium exchanger), member 3	20p13	-1.44932	7.19556	2.74577e-05
204610_s_at	CCDC85B	coiled-coil domain containing 85B	11q12.1	-0.976808	8.91629	2.74978e-05
200655_s_at	CALM1	calmodulin 1 (phosphorylase kinase, delta)	14q24-q31	-0.785566	11.5866	2.75567e-05
212653_s_at	EHBP1	EH domain binding protein 1	2p15	-0.677112	9.51433	2.76652e-05
221773_at	ELK3	ELK3, ETS-domain protein (SRF accessory protein 2)	12q23	-1.09134	9.57659	2.76674e-05
212805_at	PRUNE2	prune homolog 2 (Drosophila)	9q21.2	-1.76037	8.37381	2.88432e-05
204048_s_at	PHACTR2	phosphatase and actin regulator 2	6q24.2	-1.12015	8.38372	2.90554e-05
207719_x_at	CEP170	centrosomal protein 170kDa	1q44	-1.00609	8.75574	2.90554e-05
211980_at	COL4A1	collagen, type IV, alpha 1	13q34	-1.0535	11.8071	2.96455e-05
212607_at	AKT3	v-akt murine thymoma viral oncogene homolog 3 (protein kinase B, gamma)	1q44	-0.993087	8.80723	2.97055e-05
213004_at	ANGPTL2	angiopoietin-like 2	9q34	-1.08903	8.38913	2.99352e-05
212873_at	HMHA1	histocompatibility (minor) HA-1	19p13.3	-1.35605	8.53561	3.03691e-05
206411_s_at	ABL2	v-abl Abelson murine leukemia viral oncogene homolog 2	1q25.2	-1.10575	7.56175	3.07263e-05
208634_s_at	MACF1	microtubule-actin crosslinking factor 1	1p32-p31	-0.852351	11.3491	3.11784e-05
204681_s_at	RAPGEF5	Rap guanine nucleotide exchange factor (GEF) 5	7p15.3	-1.13806	7.3604	3.12538e-05
202393_s_at	KLF10	Kruppel-like factor 10	8q22.2	-1.11297	9.53025	3.17786e-05
202878_s_at	CD93	CD93 molecule	20p11.21	-1.09665	9.82963	3.22033e-05
201477_s_at	RRM1	ribonucleotide reductase M1	11p15.5	-0.781461	10.7027	3.22952e-05
204682_at	LTBP2	latent transforming growth factor beta binding protein 2	14q24	-1.00839	9.82568	3.26773e-05
219507_at	RSRC1	arginine/serine-rich coiled-coil 1	3q25.32	-1.33725	7.62541	3.2784e-05
221581_s_at	LAT2	linker for activation of T cells family, member 2	7q11.23	-1.15357	7.45544	3.30559e-05
219506_at	C1orf54	chromosome 1 open reading frame 54	1q21.2	-1.07869	9.53028	3.32117e-05
212286_at	ANKRD12	ankyrin repeat domain 12	18p11.22	-1.7427	6.55038	3.35204e-05
204606_at	CCL21	chemokine (C-C motif) ligand 21	9p13	-1.54479	7.23887	3.36467e-05
215182_x_at				-1.45481	6.80456	3.39712e-05
207365_x_at	USP34	ubiquitin specific peptidase 34	2p15	-0.872356	11.1452	3.39712e-05
219025_at	CD248	CD248 molecule, endosialin	11q13	-0.851422	9.30269	3.46299e-05
202709_at	FMOD	fibromodulin	1q32	-0.835614	9.15632	3.46299e-05
201069_at	MMP2	matrix metallopeptidase 2 (gelatinase A, 72kDa gelatinase, 72kDa type IV collagenase)	16q13-q21	-1.32292	10.9115	3.50849e-05
210202_s_at	BIN1	bridging integrator 1	2q14	-1.87909	6.43157	3.53053e-05
216950_s_at				-1.13668	7.92348	3.54095e-05
217997_at	PHLDA1	pleckstrin homology-like domain, family A, member 1	12q15	-1.01216	8.10977	3.54352e-05
201310_s_at	C5orf13	chromosome 5 open reading frame 13	5q22.1	-1.08233	10.1103	3.59488e-05
210794_s_at	MEG3	maternally expressed 3 (non-protein coding)	14q32	-1.25324	8.80272	3.62086e-05
209534_x_at	AKAP13	A kinase (PRKA) anchor protein 13	15q24-q25	-0.696675	9.4912	3.66551e-05
201721_s_at	LAPTM5	lysosomal protein transmembrane 5	1p34	-1.09937	11.4095	3.67145e-05
204150_at	STAB1	stabilin 1	3p21.1	-1.06068	9.70719	3.7151e-05
222043_at	CLU	clusterin	8p21-p12	-1.58269	8.05152	3.72138e-05
31846_at	RHOD	ras homolog gene family, member D	11q14.3	-0.792171	10.3201	3.72138e-05
209263_x_at	TSPAN4	tetraspanin 4	11p15.5	-0.852559	8.93239	3.75946e-05
214085_x_at	GLIPR1	GLI pathogenesis-related 1	12q21.2	-1.74239	7.46884	3.7893e-05
201465_s_at	JUN	jun proto-oncogene	1p32-p31	-2.00042	6.36555	3.81068e-05
221743_at	CELF1	CUGBP, Elav-like family member 1	11p11	-0.620059	10.9821	3.81905e-05
202998_s_at	LOXL2	lysyl oxidase-like 2	8p21.3	-1.08398	9.51817	3.83436e-05
213066_at	RUSC2	RUN and SH3 domain containing 2	9p13.3	-1.32485	6.80214	3.88205e-05
204595_s_at				-1.09737	8.87983	3.89602e-05
205239_at	AREG	amphiregulin	4q13-q21	-1.55453	7.82274	3.89735e-05
216598_s_at	CCL2	chemokine (C-C motif) ligand 2	17q11.2-q12	-2.36768	8.25366	3.9463e-05
209969_s_at	STAT1	signal transducer and activator of transcription 1, 91kDa	2q32.2	-1.51644	10.1674	3.96089e-05
61734_at	RCN3	reticulocalbin 3, EF-hand calcium binding domain	19q13.33	-1.64104	7.80408	3.97627e-05
204823_at	NAV3	neuron navigator 3	12q14.3	-1.63437	6.31981	3.99466e-05
202056_at	KPNA1	karyopherin alpha 1 (importin alpha 5)	3q21	-0.716691	8.28815	4.02375e-05
207173_x_at	CDH11	cadherin 11, type 2, OB-cadherin (osteoblast)	16q22.1	-1.73194	8.69368	4.09296e-05
208178_x_at	TRIO	triple functional domain (PTPRF interacting)	5p15.2	-1.90886	6.88022	4.09296e-05
218886_at	PAK1IP1	PAK1 interacting protein 1	6p24.2	-1.82171	6.96568	4.10526e-05
212565_at	STK38L	serine/threonine kinase 38 like	12p11.23	-1.08852	7.83738	4.11822e-05
220330_s_at	SAMSN1	SAM domain, SH3 domain and nuclear localization signals 1	21q11	-1.5092	7.12267	4.1533e-05
221510_s_at	GLS	glutaminase	2q32-q34	-1.1814	8.21706	4.17926e-05
219821_s_at	GFOD1	glucose-fructose oxidoreductase domain containing 1	6pter-p22.1	-0.985927	9.12859	4.27161e-05
208637_x_at	ACTN1	actinin, alpha 1	14q22-q24	-1.21944	10.4415	4.28131e-05
217118_s_at	C22orf9	chromosome 22 open reading frame 9	22q13.31	-0.740449	10.2028	4.3191e-05
209387_s_at	TM4SF1	transmembrane 4 L six family member 1	3q21-q25	-2.14966	8.14789	4.3535e-05
203542_s_at	KLF9	Kruppel-like factor 9	9q13	-1.48056	7.29088	4.37165e-05
201060_x_at	STOM	stomatin	9q34.1	-1.18453	9.2966	4.37268e-05
205079_s_at	MPDZ	multiple PDZ domain protein	9p23	-1.21405	7.72738	4.38769e-05
209082_s_at	COL18A1	collagen, type XVIII, alpha 1	21q22.3	-0.99358	9.46778	4.42889e-05
204618_s_at	GABPB1	GA binding protein transcription factor, beta subunit 1	15q21.2	-0.65988	8.26876	4.47719e-05
218502_s_at	TRPS1	trichorhinophalangeal syndrome I	8q24.12	-1.52595	7.30422	4.55141e-05
218974_at	SOBP	sine oculis binding protein homolog (Drosophila)	6q21	-1.31029	7.93141	4.56786e-05
219779_at	ZFHX4	zinc finger homeobox 4	8q21.11	-1.11211	7.71363	4.61476e-05
210002_at	GATA6	GATA binding protein 6	18q11.1-q11.2	-1.60664	6.66279	4.62323e-05
208982_at	PECAM1	platelet/endothelial cell adhesion molecule	17q23	-1.20983	10.2594	4.63687e-05
212817_at	DNAJB5	DnaJ (Hsp40) homolog, subfamily B, member 5	9p13.3	-0.924013	7.86714	4.68099e-05
205242_at	CXCL13	chemokine (C-X-C motif) ligand 13	4q21	-2.41126	7.68491	4.75369e-05
205579_at	HRH1	histamine receptor H1	3p25	-0.804471	7.85971	4.86528e-05
201153_s_at	MBNL1	muscleblind-like (Drosophila)	3q25	-0.887685	10.3181	4.95759e-05
219471_at	C13orf18	chromosome 13 open reading frame 18	13q14.13	-1.51543	6.86549	4.96515e-05
201296_s_at	WSB1	WD repeat and SOCS box-containing 1	17q11.1	-0.969863	10.9228	4.99498e-05
213975_s_at	LYZ	lysozyme	12q15	-1.99638	9.9201	4.99498e-05
212624_s_at	CHN1	chimerin (chimaerin) 1	2q31.1	-1.4615	7.52105	4.99498e-05
209289_at	NFIB	nuclear factor I/B	9p24.1	-1.23839	9.5481	5.01169e-05
209337_at	PSIP1	PC4 and SFRS1 interacting protein 1	9p22.3	-1.01566	9.02098	5.02649e-05
207691_x_at	ENTPD1	ectonucleoside triphosphate diphosphohydrolase 1	10q24	-0.840117	7.94557	5.20246e-05
201617_x_at	CALD1	caldesmon 1	7q33	-2.61949	6.34118	5.21138e-05
214843_s_at	USP33	ubiquitin specific peptidase 33	1p31.1	-1.09839	7.96851	5.25355e-05
210793_s_at	NUP98	nucleoporin 98kDa	11p15.5	-0.684229	7.9929	5.2685e-05
218588_s_at	FAM114A2	family with sequence similarity 114, member A2	5q31-q33	-0.808199	7.99915	5.31858e-05
215870_s_at	PLA2G5	phospholipase A2, group V	1p36-p34	-2.1257	5.34118	5.33044e-05
201853_s_at	CDC25B	cell division cycle 25 homolog B (S. pombe)	20p13	-0.986121	10.1883	5.33044e-05
201749_at	ECE1	endothelin converting enzyme 1	1p36.1	-0.647798	8.66305	5.33078e-05
214038_at	CCL8	chemokine (C-C motif) ligand 8	17q11.2	-1.51621	7.34521	5.38067e-05
204655_at	CCL5	chemokine (C-C motif) ligand 5	17q11.2-q12	-1.43012	9.00374	5.40085e-05
204482_at	CLDN5	claudin 5	22q11.21	-1.80517	7.57428	5.41267e-05
213434_at	STX2	syntaxin 2	12q24.33	-0.727267	8.23758	5.43494e-05
213488_at	SNED1	sushi, nidogen and EGF-like domains 1	2q37.3	-1.11021	7.47225	5.44109e-05
213924_at	MPPE1	metallophosphoesterase 1	18p11.21	-1.92557	7.03504	5.44668e-05
201795_at	LBR	lamin B receptor	1q42.1	-0.924228	10.3757	5.4507e-05
218304_s_at	OSBPL11	oxysterol binding protein-like 11	3q21	-0.6563	7.85516	5.4973e-05
220796_x_at	SLC35E1	solute carrier family 35, member E1	19p13.11	-0.888993	11.6321	5.53529e-05
205399_at	DCLK1	doublecortin-like kinase 1	13q13	-1.67735	6.34785	5.65849e-05
206702_at	TEK	TEK tyrosine kinase, endothelial	9p21	-1.32062	7.27721	5.80246e-05
203797_at	VSNL1	visinin-like 1	2p24.3	-1.28824	8.24858	5.80246e-05
209540_at	IGF1	insulin-like growth factor 1 (somatomedin C)	12q23.2	-2.43524	6.76317	5.8167e-05
208451_s_at				-1.59591	9.29453	5.82733e-05
214104_at	GPR161	G protein-coupled receptor 161	1q24.2	-1.04446	7.6285	5.85001e-05
202992_at	C7	complement component 7	5p13	-2.25773	7.17124	5.89016e-05
214972_at	MGEA5	meningioma expressed antigen 5 (hyaluronidase)	10q24.1-q24.3	-0.919036	7.59571	5.90821e-05
201743_at	CD14	CD14 molecule	5q22-q32	-1.34139	9.46775	5.91385e-05
203002_at	AMOTL2	angiomotin like 2	3q21-q22	-0.823503	8.61852	5.91883e-05
217738_at	NAMPT	nicotinamide phosphoribosyltransferase	7q22.3	-0.914798	9.8718	5.98099e-05
209225_x_at	TNPO1	transportin 1	5q13.2	-1.0515	9.76171	6.02473e-05
209348_s_at	MAF	v-maf musculoaponeurotic fibrosarcoma oncogene homolog (avian)	16q22-q23	-1.27614	8.37541	6.0519e-05
213746_s_at	FLNA	filamin A, alpha	Xq28	-1.68918	9.63522	6.08343e-05
201531_at	ZFP36	zinc finger protein 36, C3H type, homolog (mouse)	19q13.1	-1.29392	11.2135	6.13424e-05
214369_s_at	RASGRP2	RAS guanyl releasing protein 2 (calcium and DAG-regulated)	11q13	-0.783015	7.79487	6.13424e-05
212473_s_at	MICAL2	microtubule associated monoxygenase, calponin and LIM domain containing 2	11p15.3	-0.932661	10.1157	6.16833e-05
212665_at	TIPARP	TCDD-inducible poly(ADP-ribose) polymerase	3q25.31	-1.0419	9.52426	6.47041e-05
217767_at	C3	complement component 3	19p13.3-p13.2	-1.87423	10.8585	6.48327e-05
202273_at	PDGFRB	platelet-derived growth factor receptor, beta polypeptide	5q33.1	-1.10047	8.84512	6.59653e-05
218181_s_at	MAP4K4	mitogen-activated protein kinase kinase kinase kinase 4	2q11.2-q12	-0.706773	8.43882	6.60903e-05
204955_at	SRPX	sushi-repeat-containing protein, X-linked	Xp21.1	-1.53148	9.06045	6.66953e-05
205596_s_at	SMURF2	SMAD specific E3 ubiquitin protein ligase 2	17q22-q23	-0.874037	8.714	6.69115e-05
205534_at	PCDH7	protocadherin 7	4p15	-1.60128	7.1039	6.69115e-05
219634_at	CHST11	carbohydrate (chondroitin 4) sulfotransferase 11	12q	-1.48035	7.03272	6.69276e-05
204639_at	ADA	adenosine deaminase	20q13.12	-1.28547	8.05382	6.70625e-05
214374_s_at	PPFIBP1	PTPRF interacting protein, binding protein 1 (liprin beta 1)	12p12.1	-2.3959	5.28907	6.73023e-05
204083_s_at	TPM2	tropomyosin 2 (beta)	9p13	-1.75288	10.8496	6.81242e-05
209589_s_at	EPHB2	EPH receptor B2	1p36.1-p35	-1.32154	7.29974	6.89338e-05
209305_s_at	GADD45B	growth arrest and DNA-damage-inducible, beta	19p13.3	-1.26549	8.39121	6.89942e-05
215813_s_at	PTGS1	prostaglandin-endoperoxide synthase 1 (prostaglandin G/H synthase and cyclooxygenase)	9q32-q33.3	-1.40221	8.91054	6.97864e-05
215462_at				-0.873523	7.79204	6.9896e-05
210845_s_at	PLAUR	plasminogen activator, urokinase receptor	19q13	-0.969359	9.74091	7.03402e-05
214212_x_at	FERMT2	fermitin family member 2	14q22.1	-1.14322	7.62748	7.0785e-05
210538_s_at	BIRC3	baculoviral IAP repeat-containing 3	11q22	-1.48001	7.2216	7.11132e-05
207808_s_at	PROS1	protein S (alpha)	3q11.2	-1.02434	8.16502	7.11132e-05
219559_at	SLC17A9	solute carrier family 17, member 9	20q13.33	-0.862643	8.20658	7.14232e-05
221734_at	PRRC1	proline-rich coiled-coil 1	5q23.2	-1.06354	7.97128	7.19008e-05
214306_at	OPA1	optic atrophy 1 (autosomal dominant)	3q28-q29	-0.846224	7.87631	7.22648e-05
219371_s_at	KLF2	Kruppel-like factor 2 (lung)	19p13.13-p13.11	-1.39901	8.86299	7.22648e-05
208962_s_at	FADS1	fatty acid desaturase 1	11q12.2-q13.1	-1.19734	8.30639	7.27539e-05
218802_at	CCDC109B	coiled-coil domain containing 109B	4q25	-1.32999	8.84397	7.35076e-05
202953_at	C1QB	complement component 1, q subcomponent, B chain	1p36.12	-1.34936	9.7681	7.35076e-05
214722_at	NOTCH2NL	notch 2 N-terminal like	1q21.2	-0.815669	11.2762	7.35323e-05
201300_s_at	PRNP	prion protein	20p13	-1.16338	11.0263	7.35323e-05
214902_x_at				-0.958462	10.5289	7.36728e-05
217497_at	TYMP	thymidine phosphorylase	22q13	-1.28908	8.03105	7.39169e-05
203580_s_at	SLC7A6	solute carrier family 7 (cationic amino acid transporter, y+ system), member 6	16q22.1	-0.805374	8.51122	7.39333e-05
200859_x_at	FLNA	filamin A, alpha	Xq28	-1.46384	11.4637	7.39333e-05
213933_at	PTGER3	prostaglandin E receptor 3 (subtype EP3)	1p31.2	-1.54158	7.14276	7.42066e-05
213068_at	DPT	dermatopontin	1q12-q23	-2.12281	6.64261	7.43906e-05
203810_at	DNAJB4	DnaJ (Hsp40) homolog, subfamily B, member 4	1p31.1	-1.1794	7.314	7.4559e-05
218232_at	C1QA	complement component 1, q subcomponent, A chain	1p36.12	-1.38941	9.49987	7.55855e-05
201340_s_at	ENC1	ectodermal-neural cortex 1 (with BTB-like domain)	5q13	-1.67785	7.16593	7.57795e-05
202627_s_at	SERPINE1	serpin peptidase inhibitor, clade E (nexin, plasminogen activator inhibitor type 1), member 1	7q21.3-q22	-1.47425	9.17267	7.73133e-05
205713_s_at	COMP	cartilage oligomeric matrix protein	19p13.1	-2.59056	7.42978	7.81502e-05
204281_at	TEAD4	TEA domain family member 4	12p13.3-p13.2	-1.24031	7.82185	7.83809e-05
202208_s_at	ARL4C	ADP-ribosylation factor-like 4C	2q37.1	-1.08855	9.21945	7.94199e-05
200731_s_at	PTP4A1	protein tyrosine phosphatase type IVA, member 1	6q12	-1.08501	8.36446	7.97829e-05
212509_s_at	MXRA7	matrix-remodelling associated 7	17q25.1	-1.15466	11.5372	7.99423e-05
207604_s_at	SLC4A7	solute carrier family 4, sodium bicarbonate cotransporter, member 7	3p22	-1.13429	8.25662	8.16276e-05
211896_s_at	DCN	decorin	12q21.33	-1.59928	10.5495	8.23952e-05
212364_at	MYO1B	myosin IB	2q12-q34	-1.16304	8.38463	8.27463e-05
203821_at	HBEGF	heparin-binding EGF-like growth factor	5q23	-1.69082	8.34386	8.29955e-05
209280_at	MRC2	mannose receptor, C type 2	17q23.2	-0.860079	8.02998	8.29955e-05
215903_s_at	MAST2	microtubule associated serine/threonine kinase 2	1p34.1	-0.69766	9.23981	8.29967e-05
214027_x_at				-2.81851	8.29389	8.32985e-05
202007_at	NID1	nidogen 1	1q43	-1.61843	7.89437	8.36144e-05
208881_x_at	IDI1	isopentenyl-diphosphate delta isomerase 1	10p15.3	-0.710958	10.2148	8.36144e-05
203876_s_at	MMP11	matrix metallopeptidase 11 (stromelysin 3)	22q11.2	-1.32732	6.98298	8.36144e-05
222024_s_at	AKAP13	A kinase (PRKA) anchor protein 13	15q24-q25	-0.932669	9.28637	8.36654e-05
204784_s_at	MLF1	myeloid leukemia factor 1	3q25.1	-1.13733	8.95793	8.46839e-05
204842_x_at	PRKAR2A	protein kinase, cAMP-dependent, regulatory, type II, alpha	3p21.3-p21.2	-0.826255	9.98753	8.51801e-05
216321_s_at	NR3C1	nuclear receptor subfamily 3, group C, member 1 (glucocorticoid receptor)	5q31.3	-1.31472	8.22106	8.60521e-05
202638_s_at	ICAM1	intercellular adhesion molecule 1	19p13.3-p13.2	-1.07648	7.98893	8.68915e-05
215439_x_at				-0.934027	8.34135	8.72149e-05
205923_at	RELN	reelin	7q22	-1.21174	6.87841	8.77681e-05
201141_at	GPNMB	glycoprotein (transmembrane) nmb	7p15	-1.62466	11.2879	8.77681e-05
207358_x_at	MACF1	microtubule-actin crosslinking factor 1	1p32-p31	-0.762288	9.2464	9.0489e-05
201671_x_at	USP14	ubiquitin specific peptidase 14 (tRNA-guanine transglycosylase)	18p11.32	-1.12862	8.56311	9.11373e-05
215628_x_at				-0.706479	10.146	9.1676e-05
217905_at	C10orf119	chromosome 10 open reading frame 119	10q26.11	-0.610873	8.67131	9.26236e-05
212884_x_at	APOE	apolipoprotein E	19q13.2	-1.04038	10.1325	9.33154e-05
221660_at	MYL10	myosin, light chain 10, regulatory	7q22.1	-1.28787	6.79115	9.41287e-05
205656_at	PCDH17	protocadherin 17	13q21.1	-0.790818	9.14543	9.4302e-05
204947_at	E2F1	E2F transcription factor 1	20q11.2	-1.12381	7.40122	9.4302e-05
211430_s_at				-1.99355	13.3873	9.45997e-05
213397_x_at				-1.04406	8.54544	9.71483e-05
212958_x_at	PAM	peptidylglycine alpha-amidating monooxygenase	5q14-q21	-0.780729	9.93234	9.71483e-05
213733_at	MYO1F	myosin IF	19p13.3-p13.2	-0.791598	8.36883	9.73776e-05
215221_at				-0.789458	8.42686	9.78726e-05
204078_at	LEPREL4	leprecan-like 4	17q21.2	-1.28633	7.63579	9.81506e-05
210105_s_at	FYN	FYN oncogene related to SRC, FGR, YES	6q21	-0.966425	9.09442	9.92199e-05
222214_at				-1.46393	7.16503	9.93222e-05
204646_at	DPYD	dihydropyrimidine dehydrogenase	1p22	-1.53134	7.15699	9.94356e-05
213316_at	KIAA1462	KIAA1462	10p11.23	-0.772055	7.8257	9.96157e-05
203868_s_at	VCAM1	vascular cell adhesion molecule 1	1p32-p31	-1.33458	8.95816	9.97409e-05
220765_s_at	LIMS2	LIM and senescent cell antigen-like domains 2	2q14.3	-1.0025	8.98359	0.000100222
211795_s_at	FYB	FYN binding protein	5p13.1	-1.4533	6.87814	0.000100222
214627_at	EPX	eosinophil peroxidase	17q23.1	-1.07886	7.16369	0.000100269
208790_s_at	PTRF	polymerase I and transcript release factor	17q21.2	-2.04631	5.8046	0.000100811
214043_at	PTPRD	protein tyrosine phosphatase, receptor type, D	9p23-p24.3	-1.66259	6.09342	0.000101899
212571_at	CHD8	chromodomain helicase DNA binding protein 8	14q11.2	-0.651243	9.15206	0.000102355
210943_s_at	LYST	lysosomal trafficking regulator	1q42.1-q42.2	-0.839216	8.54837	0.000102964
205681_at	BCL2A1	BCL2-related protein A1	15q24.3	-1.81055	6.65881	0.000102964
218638_s_at	SPON2	spondin 2, extracellular matrix protein	4p16.3	-0.996435	10.1	0.000104702
218656_s_at	LHFP	lipoma HMGIC fusion partner	13q12	-1.16465	8.48761	0.000104802
221829_s_at	TNPO1	transportin 1	5q13.2	-1.39273	10.5503	0.000105712
213001_at	ANGPTL2	angiopoietin-like 2	9q34	-0.972436	9.67671	0.000107694
217820_s_at	ENAH	enabled homolog (Drosophila)	1q42.12	-0.929194	10.1779	0.000107694
213241_at	PLXNC1	plexin C1	12q23.3	-1.04855	8.02364	0.000107869
209616_s_at	CES1	carboxylesterase 1 (monocyte/macrophage serine esterase 1)	16q22.2	-1.70305	7.38215	0.00010972
202888_s_at	ANPEP	alanyl (membrane) aminopeptidase	15q25-q26	-1.54416	6.75313	0.000109776
219866_at	CLIC5	chloride intracellular channel 5	6p12.3	-0.9569	7.54964	0.000110468
202269_x_at	GBP1	guanylate binding protein 1, interferon-inducible, 67kDa	1p22.2	-1.37994	9.1368	0.000111283
209894_at	LEPR	leptin receptor	1p31	-1.29134	7.34273	0.000111478
215373_x_at				-0.703794	9.83409	0.000111675
219073_s_at	OSBPL10	oxysterol binding protein-like 10	3p22.3	-1.10123	8.61221	0.000112205
215588_x_at	RIOK3	RIO kinase 3 (yeast)	18q11.2	-0.716552	10.639	0.000112324
204461_x_at	RAD1	RAD1 homolog (S. pombe)	5p13.2	-0.855649	8.94361	0.000112562
220323_at	CNTD2	cyclin N-terminal domain containing 2	19q13.2	-0.793993	8.74961	0.000114155
202759_s_at				-1.18441	8.90343	0.00011422
219595_at				-0.886161	8.18003	0.00011422
211813_x_at	DCN	decorin	12q21.33	-1.48617	10.8322	0.000114406
216745_x_at				-0.808484	8.58012	0.00011468
204005_s_at	PAWR	PRKC, apoptosis, WT1, regulator	12q21	-0.608611	7.99187	0.00011468
200821_at	LAMP2	lysosomal-associated membrane protein 2	Xq24	-1.07398	8.79328	0.000114993
204863_s_at	IL6ST	interleukin 6 signal transducer (gp130, oncostatin M receptor)	5q11	-1.93617	6.26901	0.000115618
211657_at	CEACAM6	carcinoembryonic antigen-related cell adhesion molecule 6 (non-specific cross reacting antigen)	19q13.2	-1.90866	9.20735	0.000115718
202357_s_at				-1.42306	8.68115	0.000115719
203416_at	CD53	CD53 molecule	1p13	-0.945622	9.87061	0.000116063
219049_at	CSGALNACT1	chondroitin sulfate N-acetylgalactosaminyltransferase 1	8p21.3	-1.38217	7.98019	0.000116719
207375_s_at	IL15RA	interleukin 15 receptor, alpha	10p15.1	-1.11121	8.26158	0.000116935
210461_s_at	ABLIM1	actin binding LIM protein 1	10q25	-1.65115	6.26878	0.000117795
212952_at	CALR	calreticulin	19p13.3-p13.2	-0.739278	9.36015	0.000118129
202192_s_at	GAS7	growth arrest-specific 7	17p13.1	-0.621835	9.1857	0.000118355
200730_s_at	PTP4A1	protein tyrosine phosphatase type IVA, member 1	6q12	-0.97582	7.37037	0.000120849
204597_x_at	STC1	stanniocalcin 1	8p21-p11.2	-1.40259	7.72458	0.000121069
210686_x_at	SLC25A16	solute carrier family 25 (mitochondrial carrier; Graves disease autoantigen), member 16	10q21.3	-0.689371	10.2502	0.000121635
213547_at	CAND2	cullin-associated and neddylation-dissociated 2 (putative)	3p25.2	-1.0475	7.36437	0.000121657
214375_at				-1.73195	7.05806	0.000121946
204556_s_at	DZIP1	DAZ interacting protein 1	13q32.1	-0.963589	7.75034	0.000122313
201117_s_at	CPE	carboxypeptidase E	4q32.3	-1.59951	7.02951	0.00012633
40489_at	ATN1	atrophin 1	12p13.31	-1.22725	7.38897	0.000128075
204951_at	RHOH	ras homolog gene family, member H	4p13	-1.21212	6.99898	0.000128437
212382_at	TCF4	transcription factor 4	18q21.1	-1.56062	7.22106	0.000128709
200732_s_at	PTP4A1	protein tyrosine phosphatase type IVA, member 1	6q12	-0.792915	9.70713	0.000128713
210524_x_at				-1.01557	9.38684	0.000128933
221523_s_at	RRAGD	Ras-related GTP binding D	6q15-q16	-1.37869	7.30672	0.000129687
202637_s_at	ICAM1	intercellular adhesion molecule 1	19p13.3-p13.2	-0.91478	9.26755	0.000129946
221031_s_at	APOLD1	apolipoprotein L domain containing 1	12p13.1	-1.26339	8.95723	0.000130187
213553_x_at	APOC1	apolipoprotein C-I	19q13.2	-1.56269	10.0341	0.000130187
209386_at	TM4SF1	transmembrane 4 L six family member 1	3q21-q25	-1.60242	10.5411	0.000132877
212845_at	SAMD4A	sterile alpha motif domain containing 4A	14q22.2	-1.18311	8.57249	0.000133322
221898_at	PDPN	podoplanin	1p36.21	-1.79624	7.19849	0.000133328
222187_x_at	G3BP1	GTPase activating protein (SH3 domain) binding protein 1	5q33.1	-0.785074	8.1743	0.000133328
201058_s_at	MYL9	myosin, light chain 9, regulatory	20q11.23	-1.91321	10.3862	0.000133706
204007_at	FCGR3B	Fc fragment of IgG, low affinity IIIb, receptor (CD16b)	1q23	-0.941174	8.17006	0.000134447
204438_at				-1.26087	8.75462	0.000134621
211945_s_at	ITGB1	integrin, beta 1 (fibronectin receptor, beta polypeptide, antigen CD29 includes MDF2, MSK12)	10p11.2	-0.633552	12.4673	0.000134658
204163_at	EMILIN1	elastin microfibril interfacer 1	2p23.3-p23.2	-1.75593	6.88189	0.000135598
221747_at	TNS1	tensin 1	2q35-q36	-1.6568	8.85286	0.000136712
210008_s_at	MRPS12	mitochondrial ribosomal protein S12	19q13.1-q13.2	-1.44416	6.25199	0.00013824
210784_x_at				-1.3689	7.09138	0.000138898
216524_x_at				-0.620379	10.9136	0.000139614
209406_at	BAG2	BCL2-associated athanogene 2	6p12.1-p11.2	-1.30019	7.78102	0.000139897
212203_x_at	IFITM3	interferon induced transmembrane protein 3 (1-8U)	11p15.5	-1.08997	12.6147	0.000140245
205099_s_at	CCR1	chemokine (C-C motif) receptor 1	3p21	-1.61546	6.70932	0.000140436
204670_x_at				-1.01669	12.2283	0.000142383
210172_at	SF1	splicing factor 1	11q13	-1.44435	7.22301	0.000143964
212256_at	GALNT10	UDP-N-acetyl-alpha-D-galactosamine:polypeptide N-acetylgalactosaminyltransferase 10 (GalNAc-T10)	5q33.2	-0.673649	8.68617	0.000145138
209481_at	SNRK	SNF related kinase	3p22.1	-0.65253	9.78651	0.000145919
205103_at	C1orf61	chromosome 1 open reading frame 61	1q22	-1.12355	7.70979	0.000146502
213026_at	ATG12	ATG12 autophagy related 12 homolog (S. cerevisiae)	5q21-q22	-0.832575	9.26242	0.000146502
206580_s_at	EFEMP2	EGF-containing fibulin-like extracellular matrix protein 2	11q13.1	-0.84483	9.73345	0.000146539
219410_at	TMEM45A	transmembrane protein 45A	3q12.2	-1.73826	9.42265	0.000146866
212224_at	ALDH1A1	aldehyde dehydrogenase 1 family, member A1	9q21.13	-2.34469	6.08226	0.000147246
209897_s_at	SLIT2	slit homolog 2 (Drosophila)	4p15.2	-0.902965	7.78941	0.000147246
202587_s_at	AK1	adenylate kinase 1	9q34.1	-0.924092	8.97623	0.000148023
215034_s_at	TM4SF1	transmembrane 4 L six family member 1	3q21-q25	-1.75438	9.07715	0.000148278
219863_at	HERC5	hect domain and RLD 5	4q22.1	-0.975137	8.38212	0.000149492
217996_at	PHLDA1	pleckstrin homology-like domain, family A, member 1	12q15	-1.22968	9.07439	0.000150876
215283_at	LOC339290	hypothetical LOC339290	18p11.31	-0.755632	7.73285	0.000152491
204621_s_at	NR4A2	nuclear receptor subfamily 4, group A, member 2	2q22-q23	-1.5335	6.79103	0.00015326
202600_s_at	NRIP1	nuclear receptor interacting protein 1	21q11.2	-1.77176	7.45648	0.000153501
217897_at	FXYD6	FXYD domain containing ion transport regulator 6	11q23.3	-1.50574	8.54767	0.000155904
219090_at	SLC24A3	solute carrier family 24 (sodium/potassium/calcium exchanger), member 3	20p13	-1.83084	7.06148	0.000156381
206211_at	SELE	selectin E	1q22-q25	-2.0568	6.34287	0.000156778
216542_x_at				-0.838152	8.62858	0.000157249
209663_s_at	ITGA7	integrin, alpha 7	12q13	-1.83353	6.07965	0.00016048
204082_at	PBX3	pre-B-cell leukemia homeobox 3	9q33.3	-0.843123	8.50461	0.000161745
211143_x_at	NR4A1	nuclear receptor subfamily 4, group A, member 1	12q13	-1.29631	7.32005	0.000161753
212188_at	KCTD12	potassium channel tetramerisation domain containing 12	13q22.3	-2.12354	6.70905	0.000162595
205330_at	MN1	meningioma (disrupted in balanced translocation) 1	22q11	-1.39275	7.02339	0.00016267
202936_s_at	SOX9	SRY (sex determining region Y)-box 9	17q23	-1.4054	8.48595	0.000162888
214041_x_at	RPL37A	ribosomal protein L37a	2q35	-1.56138	9.02943	0.000163017
204584_at	L1CAM	L1 cell adhesion molecule	Xq28	-1.60657	6.66816	0.000163527
209708_at	MOXD1	monooxygenase, DBH-like 1	6q23.2	-1.08861	7.96941	0.000163832
204771_s_at	TTF1	transcription termination factor, RNA polymerase I	9q34.13	-0.680663	8.65934	0.000164916
209013_x_at	TRIO	triple functional domain (PTPRF interacting)	5p15.2	-1.82991	6.60171	0.000165298
202631_s_at	APPBP2	amyloid beta precursor protein (cytoplasmic tail) binding protein 2	17q21-q23	-0.799338	7.60874	0.000165298
205752_s_at	GSTM5	glutathione S-transferase mu 5	1p13.3	-0.929637	7.81429	0.000165298
208691_at	TFRC	transferrin receptor (p90, CD71)	3q29	-0.812659	12.2946	0.000165898
44702_at	SYDE1	synapse defective 1, Rho GTPase, homolog 1 (C. elegans)	19p13.12	-0.612315	8.89643	0.000167484
204916_at	RAMP1	receptor (G protein-coupled) activity modifying protein 1	2q36-q37.1	-0.990134	8.71897	0.000168151
201151_s_at	MBNL1	muscleblind-like (Drosophila)	3q25	-1.79322	6.07448	0.000169196
214807_at				-1.43527	6.54973	0.000169289
204923_at	SASH3	SAM and SH3 domain containing 3	Xq26	-0.705508	8.39464	0.000169289
209579_s_at	MBD4	methyl-CpG binding domain protein 4	3q21.3	-1.3593	9.03346	0.000170368
202669_s_at	EFNB2	ephrin-B2	13q33	-1.43673	7.28667	0.000170496
203627_at	IGF1R	insulin-like growth factor 1 receptor	15q26.3	-0.738234	8.01386	0.000171368
213994_s_at	SPON1	spondin 1, extracellular matrix protein	11p15.2	-2.12129	6.84449	0.000174635
221477_s_at	SOD2	superoxide dismutase 2, mitochondrial	6q25.3	-0.930476	9.28395	0.000175609
214327_x_at	TPT1	tumor protein, translationally-controlled 1	13q14	-0.62355	14.6662	0.000176169
221558_s_at	LEF1	lymphoid enhancer-binding factor 1	4q23-q25	-1.14932	7.37758	0.000176723
220358_at	BATF3	basic leucine zipper transcription factor, ATF-like 3	1q32.3	-1.05855	7.54954	0.000178343
220071_x_at	HAUS2	HAUS augmin-like complex, subunit 2	15q15.2	-0.760349	11.4087	0.000179653
221071_at				-1.3689	6.50855	0.000180178
221918_at	CDK17	cyclin-dependent kinase 17	12q23.1	-0.927496	8.99523	0.000180235
200757_s_at	CALU	calumenin	7q32.1	-0.734862	10.5175	0.000183009
217430_x_at	COL1A1	collagen, type I, alpha 1	17q21.33	-1.00732	8.68222	0.000183387
218414_s_at	NDE1	nudE nuclear distribution gene E homolog 1 (A. nidulans)	16p13.11	-0.765086	8.55175	0.000183408
202920_at	ANK2	ankyrin 2, neuronal	4q25-q27	-1.35051	7.578	0.000183784
204194_at	BACH1	BTB and CNC homology 1, basic leucine zipper transcription factor 1	21q22.11	-1.06318	7.72832	0.000183784
212274_at	LPIN1	lipin 1	2p25.1	-0.754248	8.86224	0.000185489
211709_s_at	CLEC11A	C-type lectin domain family 11, member A	19q13.3	-0.875518	8.65442	0.000189454
203819_s_at	IGF2BP3	insulin-like growth factor 2 mRNA binding protein 3	7p11	-2.06895	6.25367	0.000189608
221942_s_at	GUCY1A3	guanylate cyclase 1, soluble, alpha 3	4q31.1-q31.2	-0.855077	8.54447	0.00019355
209422_at	PHF20	PHD finger protein 20	20q11.22-q11.23	-0.638156	9.27396	0.000195075
203417_at	MFAP2	microfibrillar-associated protein 2	1p36.1-p35	-1.42899	9.11896	0.000197877
215206_at				-1.15407	7.59241	0.000200011
219221_at	ZBTB38	zinc finger and BTB domain containing 38	3q23	-0.970255	8.62826	0.000200443
218773_s_at	MSRB2	methionine sulfoxide reductase B2	10p12	-0.729075	10.0979	0.000200588
212099_at	RHOB	ras homolog gene family, member B	2p24	-1.24234	10.9413	0.000201702
209678_s_at	PRKCI	protein kinase C, iota	3q26.3	-0.969712	9.37488	0.00020187
203496_s_at	MED1	mediator complex subunit 1	17q12	-1.92534	6.01393	0.000202107
207067_s_at	HDC	histidine decarboxylase	15q21-q22	-1.32237	7.31372	0.000202908
200782_at	ANXA5	annexin A5	4q26-q28	-0.848765	11.0151	0.00020307
206118_at	STAT4	signal transducer and activator of transcription 4	2q32.2-q32.3	-0.790489	7.75449	0.00020307
200630_x_at	SET	SET nuclear oncogene	9q34	-0.652533	12.0276	0.000203552
218501_at	ARHGEF3	Rho guanine nucleotide exchange factor (GEF) 3	3p21-p13	-0.799233	8.86366	0.000204475
204466_s_at	SNCA	synuclein, alpha (non A4 component of amyloid precursor)	4q21	-1.03708	7.25018	0.000206157
210517_s_at	AKAP12	A kinase (PRKA) anchor protein 12	6q24-q25	-1.41375	8.75042	0.000206157
216272_x_at	SYDE1	synapse defective 1, Rho GTPase, homolog 1 (C. elegans)	19p13.12	-0.623346	8.13701	0.000206157
204574_s_at	MMP19	matrix metallopeptidase 19	12q14	-0.938374	7.65583	0.00020857
205265_s_at	SPEG	SPEG complex locus	2q35	-1.46941	7.63324	0.00020857
209523_at	TAF2	TAF2 RNA polymerase II, TATA box binding protein (TBP)-associated factor, 150kDa	8q24.12	-0.822384	8.84636	0.00020857
212220_at	PSME4	proteasome (prosome, macropain) activator subunit 4	2p16.2	-1.27465	6.62673	0.00020857
204348_s_at	AK4	adenylate kinase 4	1p31.3	-1.20123	8.02453	0.000209297
208961_s_at	KLF6	Kruppel-like factor 6	10p15	-1.02942	10.7485	0.000209793
218660_at	DYSF	dysferlin, limb girdle muscular dystrophy 2B (autosomal recessive)	2p13.3	-0.830044	8.29932	0.000209858
202720_at	TES	testis derived transcript (3 LIM domains)	7q31.2	-0.866255	10.1985	0.00021047
211395_x_at	FCGR2C	Fc fragment of IgG, low affinity IIc, receptor for (CD32) (gene/pseudogene)	1q23.3	-0.854884	7.98484	0.000217169
200727_s_at	ACTR2	ARP2 actin-related protein 2 homolog (yeast)	2p14	-1.02901	8.17059	0.000218082
214428_x_at				-1.31403	9.53992	0.000219284
203617_x_at	ELK1	ELK1, member of ETS oncogene family	Xp11.2	-0.736334	8.35068	0.000221214
209541_at	IGF1	insulin-like growth factor 1 (somatomedin C)	12q23.2	-1.6125	7.51602	0.00022155
204243_at	RLF	rearranged L-myc fusion	1p32	-0.632744	8.987	0.000221847
202628_s_at	SERPINE1	serpin peptidase inhibitor, clade E (nexin, plasminogen activator inhibitor type 1), member 1	7q21.3-q22	-1.76551	9.33446	0.000222323
213261_at	TRANK1	tetratricopeptide repeat and ankyrin repeat containing 1	3p22.2	-0.623054	8.50772	0.000222323
205700_at	HSD17B6	hydroxysteroid (17-beta) dehydrogenase 6 homolog (mouse)	12q13	-2.01451	6.39981	0.000222323
213249_at	FBXL7	F-box and leucine-rich repeat protein 7	5p15.1	-0.868165	8.09009	0.000224984
212647_at	RRAS	related RAS viral (r-ras) oncogene homolog	19q13.3-qter	-1.22922	8.69815	0.000227585
205529_s_at	RUNX1T1	runt-related transcription factor 1; translocated to, 1 (cyclin D-related)	8q22	-0.856359	7.52146	0.000229668
205356_at	USP13	ubiquitin specific peptidase 13 (isopeptidase T-3)	3q26.2-q26.3	-0.721103	8.11481	0.000229779
212341_at	YIPF6	Yip1 domain family, member 6	Xq12	-0.793852	9.23813	0.000230948
207339_s_at	LTB	lymphotoxin beta (TNF superfamily, member 3)	6p21.3	-0.866727	8.19514	0.000232066
208963_x_at	FADS1	fatty acid desaturase 1	11q12.2-q13.1	-1.31922	7.5855	0.000233586
217904_s_at	BACE1	beta-site APP-cleaving enzyme 1	11q23.2-q23.3	-1.2501	7.64176	0.000234524
204517_at	PPIC	peptidylprolyl isomerase C (cyclophilin C)	5q23.2	-0.74507	10.3709	0.000236427
215248_at	GRB10	growth factor receptor-bound protein 10	7p12.2	-1.57516	6.39321	0.000237733
219935_at	ADAMTS5	ADAM metallopeptidase with thrombospondin type 1 motif, 5	21q21.3	-0.898862	8.1284	0.000240766
201983_s_at	EGFR	epidermal growth factor receptor	7p12	-1.46906	8.72314	0.000241086
201143_s_at	EIF2S1	eukaryotic translation initiation factor 2, subunit 1 alpha, 35kDa	14q23.3	-0.975913	7.92061	0.000241189
211593_s_at	MAST2	microtubule associated serine/threonine kinase 2	1p34.1	-0.648589	9.17129	0.000247118
219092_s_at	IPPK	inositol 1,3,4,5,6-pentakisphosphate 2-kinase	9q22.31	-0.615618	8.37883	0.000251004
203423_at	RBP1	retinol binding protein 1, cellular	3q23	-1.20194	8.8948	0.000251375
201163_s_at	IGFBP7	insulin-like growth factor binding protein 7	4q12	-0.860882	11.8267	0.000251684
206157_at	PTX3	pentraxin 3, long	3q25	-1.67584	6.4179	0.000252508
221905_at	CYLD	cylindromatosis (turban tumor syndrome)	16q12.1	-1.81827	5.42356	0.000252508
218087_s_at	SORBS1	sorbin and SH3 domain containing 1	10q23.33	-2.58082	8.00087	0.000255169
219059_s_at	LYVE1	lymphatic vessel endothelial hyaluronan receptor 1	11p15	-1.407	6.7653	0.000258283
216858_x_at				-1.02532	9.45202	0.000266198
210889_s_at	FCGR2B	Fc fragment of IgG, low affinity IIb, receptor (CD32)	1q23	-1.13055	7.539	0.000271336
218421_at	CERK	ceramide kinase	22q13.31	-0.719191	8.93485	0.000274118
205119_s_at	FPR1	formyl peptide receptor 1	19q13.4	-0.831897	8.19158	0.000275954
202043_s_at	SMS	spermine synthase	Xp22.1	-0.745492	9.70434	0.000281542
37022_at	PRELP	proline/arginine-rich end leucine-rich repeat protein	1q32	-0.778792	8.65962	0.000283137
209648_x_at	SOCS5	suppressor of cytokine signaling 5	2p21	-0.871351	7.75316	0.000284845
203367_at	DUSP14	dual specificity phosphatase 14	17q12	-0.714284	8.99733	0.000284908
200839_s_at	CTSB	cathepsin B	8p22	-0.814335	12.8077	0.000286048
201279_s_at	DAB2	disabled homolog 2, mitogen-responsive phosphoprotein (Drosophila)	5p13	-0.95237	8.50684	0.000290093
204064_at	THOC1	THO complex 1	18p11.32	-0.742438	9.50942	0.000292228
203473_at	SLCO2B1	solute carrier organic anion transporter family, member 2B1	11q13	-0.683914	8.95423	0.000294142
212730_at	SYNM	synemin, intermediate filament protein	15q26.3	-1.91257	9.9279	0.000295142
204365_s_at	REEP1	receptor accessory protein 1	2p11.2	-1.2103	7.96814	0.000295142
201655_s_at	HSPG2	heparan sulfate proteoglycan 2	1p36.1-p34	-1.11563	9.73129	0.000296342
202599_s_at	NRIP1	nuclear receptor interacting protein 1	21q11.2	-0.842611	10.0154	0.000299583
201888_s_at	IL13RA1	interleukin 13 receptor, alpha 1	Xq24	-0.721157	7.74392	0.000303656
204470_at	CXCL1	chemokine (C-X-C motif) ligand 1 (melanoma growth stimulating activity, alpha)	4q21	-1.73984	8.74568	0.000303736
205266_at	LIF	leukemia inhibitory factor (cholinergic differentiation factor)	22q12.2	-1.30689	8.06958	0.000304013
209323_at	PRKRIR	protein-kinase, interferon-inducible double stranded RNA dependent inhibitor, repressor of (P58 repressor)	11q13.5	-0.772597	9.56109	0.000304197
213757_at				-0.865432	9.28067	0.00030489
219806_s_at	C11orf75	chromosome 11 open reading frame 75	11q21	-0.833508	8.79976	0.000313917
205001_s_at	DDX3Y	DEAD (Asp-Glu-Ala-Asp) box polypeptide 3, Y-linked	Yq11	-1.61667	6.42187	0.000314205
207953_at				-0.801953	8.52272	0.000314205
209967_s_at	CREM	cAMP responsive element modulator	10p11.21	-1.2886	6.98592	0.000318218
212572_at	STK38L	serine/threonine kinase 38 like	12p11.23	-0.895424	9.07147	0.000319084
221701_s_at	STRA6	stimulated by retinoic acid gene 6 homolog (mouse)	15q24.1	-0.876459	8.06121	0.00032074
200762_at	DPYSL2	dihydropyrimidinase-like 2	8p22-p21	-1.12619	9.55958	0.00032074
201315_x_at	IFITM2	interferon induced transmembrane protein 2 (1-8D)	11p15.5	-1.01521	11.9528	0.000320777
201719_s_at	EPB41L2	erythrocyte membrane protein band 4.1-like 2	6q23	-0.922689	8.90718	0.000320777
205120_s_at	SGCB	sarcoglycan, beta (43kDa dystrophin-associated glycoprotein)	4q12	-0.876158	8.50918	0.000322201
221718_s_at	AKAP13	A kinase (PRKA) anchor protein 13	15q24-q25	-0.73727	9.25186	0.000324274
209674_at	CRY1	cryptochrome 1 (photolyase-like)	12q23-q24.1	-0.76919	7.64982	0.000324459
203065_s_at	CAV1	caveolin 1, caveolae protein, 22kDa	7q31.1	-1.30609	9.8633	0.000331783
212134_at	PHLDB1	pleckstrin homology-like domain, family B, member 1	11q23.3	-0.740039	8.23743	0.00033675
209596_at	MXRA5	matrix-remodelling associated 5	Xp22.33	-1.36464	10.4752	0.000340055
212157_at	SDC2	syndecan 2	8q22-q23	-0.785435	7.97966	0.000341756
213684_s_at	PDLIM5	PDZ and LIM domain 5	4q22	-1.44938	7.09802	0.000343876
212501_at	CEBPB	CCAAT/enhancer binding protein (C/EBP), beta	20q13.1	-0.847006	12.6347	0.000346003
203592_s_at	FSTL3	follistatin-like 3 (secreted glycoprotein)	19p13	-0.80294	8.50167	0.00034637
206488_s_at	CD36	CD36 molecule (thrombospondin receptor)	7q11.2	-2.02171	6.71079	0.000352416
213642_at				-0.916501	8.47473	0.000360001
218368_s_at	TNFRSF12A	tumor necrosis factor receptor superfamily, member 12A	16p13.3	-0.904471	9.36979	0.000366418
216438_s_at				-0.627502	14.2147	0.000369158
202557_at	HSPA13	heat shock protein 70kDa family, member 13	21q11	-0.899252	8.64436	0.000374402
214110_s_at				-1.02247	8.44902	0.000374611
212585_at	OSBPL8	oxysterol binding protein-like 8	12q14	-0.763927	9.03477	0.000375976
214456_x_at				-2.54328	7.23751	0.000377924
31637_s_at				-0.744184	9.37916	0.000377924
220239_at	KLHL7	kelch-like 7 (Drosophila)	7p15.3	-0.797283	7.96001	0.000381419
219956_at	GALNT6	UDP-N-acetyl-alpha-D-galactosamine:polypeptide N-acetylgalactosaminyltransferase 6 (GalNAc-T6)	12q13	-1.41263	7.07362	0.000383095
203666_at	CXCL12	chemokine (C-X-C motif) ligand 12	10q11.1	-0.980095	8.42225	0.000383424
201280_s_at	DAB2	disabled homolog 2, mitogen-responsive phosphoprotein (Drosophila)	5p13	-1.4064	7.35426	0.000383765
215338_s_at	NKTR	natural killer-tumor recognition sequence	3p23-p21	-1.53625	7.3126	0.000384729
205192_at	MAP3K14	mitogen-activated protein kinase kinase kinase 14	17q21	-0.855229	7.83935	0.000384731
219677_at	SPSB1	splA/ryanodine receptor domain and SOCS box containing 1	1p36.22	-0.655197	8.34643	0.000386513
209290_s_at	NFIB	nuclear factor I/B	9p24.1	-1.08476	9.91728	0.000386547
211063_s_at	NCK1	NCK adaptor protein 1	3q21	-0.718099	8.76523	0.00038677
219295_s_at	PCOLCE2	procollagen C-endopeptidase enhancer 2	3q21-q24	-1.49572	6.95569	0.000391665
211965_at	ZFP36L1	zinc finger protein 36, C3H type-like 1	14q22-q24	-1.17512	7.70667	0.000391665
208373_s_at	P2RY6	pyrimidinergic receptor P2Y, G-protein coupled, 6	11q13.5	-1.07663	7.69764	0.000393536
212177_at	SFRS18	splicing factor, arginine/serine-rich 18	6q16.3	-0.951999	8.83122	0.00039459
201012_at	ANXA1	annexin A1	9q12-q21.2	-1.35486	11.6319	0.000397611
201844_s_at	RYBP	RING1 and YY1 binding protein	3p13	-0.999577	8.99282	0.000397843
210164_at	GZMB	granzyme B (granzyme 2, cytotoxic T-lymphocyte-associated serine esterase 1)	14q11.2	-1.29618	7.37273	0.000399225
210031_at	CD247	CD247 molecule	1q22-q23	-0.890977	7.87498	0.000400083
215609_at				-1.22881	6.91961	0.000400626
211924_s_at	PLAUR	plasminogen activator, urokinase receptor	19q13	-1.10241	8.45233	0.000406961
214505_s_at	FHL1	four and a half LIM domains 1	Xq26	-1.50304	8.35535	0.000406997
203167_at	TIMP2	TIMP metallopeptidase inhibitor 2	17q25	-1.5267	7.83582	0.000407692
209583_s_at	CD200	CD200 molecule	3q12-q13	-1.08734	7.89978	0.000411773
203851_at	IGFBP6	insulin-like growth factor binding protein 6	12q13	-1.08835	8.92955	0.000411913
203435_s_at	MME	membrane metallo-endopeptidase	3q25.1-q25.2	-1.70135	6.50876	0.00041532
200733_s_at	PTP4A1	protein tyrosine phosphatase type IVA, member 1	6q12	-0.652922	8.45284	0.000416084
213993_at	SPON1	spondin 1, extracellular matrix protein	11p15.2	-1.79068	6.42574	0.000420225
212561_at	DENND5A	DENN/MADD domain containing 5A	11p15.4	-0.698803	9.40664	0.000424803
206101_at	ECM2	extracellular matrix protein 2, female organ and adipocyte specific	9q22.3	-0.99384	7.44403	0.000426019
200872_at	S100A10	S100 calcium binding protein A10	1q21	-1.26193	12.6556	0.000426875
205345_at	BARD1	BRCA1 associated RING domain 1	2q34-q35	-0.865457	8.18827	0.000431636
210231_x_at	SET	SET nuclear oncogene	9q34	-0.759908	11.0559	0.000433961
214684_at	MEF2A	myocyte enhancer factor 2A	15q26	-0.831733	7.66616	0.000435566
203936_s_at	MMP9	matrix metallopeptidase 9 (gelatinase B, 92kDa gelatinase, 92kDa type IV collagenase)	20q11.2-q13.1	-1.27733	9.703	0.000439546
213958_at	CD6	CD6 molecule	11q13	-0.880444	8.10476	0.000447532
213309_at	PLCL2	phospholipase C-like 2	3p24.3	-1.6796	6.12564	0.000449192
207317_s_at	CASQ2	calsequestrin 2 (cardiac muscle)	1p13.3-p11	-1.95176	6.42908	0.00045338
210608_s_at	FUT2	fucosyltransferase 2 (secretor status included)	19q13.3	-0.63305	8.30159	0.00045338
1598_g_at	GAS6	growth arrest-specific 6	13q34	-0.931945	10.7601	0.000456439
38671_at	PLXND1	plexin D1	3q22.1	-0.741345	9.64204	0.000458114
214773_x_at	TIPRL	TIP41, TOR signaling pathway regulator-like (S. cerevisiae)	1q23.2	-1.22157	8.24684	0.000461485
214022_s_at	IFITM1	interferon induced transmembrane protein 1 (9-27)	11p15.5	-1.18351	11.5268	0.000464761
219546_at	BMP2K	BMP2 inducible kinase	4q21.21	-1.33757	6.59344	0.000467794
212588_at	PTPRC	protein tyrosine phosphatase, receptor type, C	1q31-q32	-1.01144	7.98887	0.000467794
210789_x_at	CEACAM3	carcinoembryonic antigen-related cell adhesion molecule 3	19q13.2	-0.905385	7.2044	0.000468661
221765_at	UGCG	UDP-glucose ceramide glucosyltransferase	9q31	-2.33162	6.61401	0.000469697
209949_at	NCF2	neutrophil cytosolic factor 2	1q25	-1.29244	7.62278	0.000472971
206214_at	PLA2G7	phospholipase A2, group VII (platelet-activating factor acetylhydrolase, plasma)	6p21.2-p12	-1.08356	7.98393	0.000474095
205370_x_at	DBT	dihydrolipoamide branched chain transacylase E2	1p31	-0.682366	11.9909	0.000475846
214290_s_at				-1.16257	11.0377	0.000476293
211458_s_at				-0.844634	10.3779	0.000477772
217482_at				-1.08699	7.42413	0.000477916
213568_at	OSR2	odd-skipped related 2 (Drosophila)	8q22.2	-1.57567	7.54712	0.000478801
202947_s_at	GYPC	glycophorin C (Gerbich blood group)	2q14-q21	-0.981117	8.86155	0.000480639
213429_at				-1.6651	6.57219	0.000480912
204436_at	PLEKHO2	pleckstrin homology domain containing, family O member 2	15q22.1	-0.693785	9.14639	0.000482913
209948_at	KCNMB1	potassium large conductance calcium-activated channel, subfamily M, beta member 1	5q34	-1.36525	8.3997	0.000487367
205404_at	HSD11B1	hydroxysteroid (11-beta) dehydrogenase 1	1q32-q41	-0.982169	7.38713	0.000491856
208146_s_at	CPVL	carboxypeptidase, vitellogenic-like	7p15.1	-1.25491	7.33734	0.000494821
219884_at	LHX6	LIM homeobox 6	9q33.2	-1.37481	7.27913	0.000496371
210739_x_at	SLC4A4	solute carrier family 4, sodium bicarbonate cotransporter, member 4	4q21	-0.69028	8.02586	0.000499406
219434_at	TREM1	triggering receptor expressed on myeloid cells 1	6p21.1	-1.19751	7.9266	0.000505698
213537_at	HLA-DPA1	major histocompatibility complex, class II, DP alpha 1	6p21.3	-1.2477	7.43193	0.000507789
201858_s_at	SRGN	serglycin	10q22.1	-1.53034	9.34386	0.000512671
214295_at	KIAA0485	hypothetical LOC57235		-0.887798	8.19909	0.000515067
219205_at	SRR	serine racemase	17p13	-0.636575	8.22354	0.000515067
203756_at	ARHGEF17	Rho guanine nucleotide exchange factor (GEF) 17	11q13.4	-0.966483	7.84942	0.000515945
215600_x_at	FBXW12	F-box and WD repeat domain containing 12	3p21.31	-0.747395	10.9024	0.000519419
219489_s_at				-1.09785	10.3289	0.00052198
202806_at	DBN1	drebrin 1	5q35.3	-0.970997	8.79367	0.000522789
200995_at	IPO7	importin 7	11p15.4	-0.721648	8.70364	0.000524066
212298_at	NRP1	neuropilin 1	10p12	-1.10861	7.46093	0.000524147
201720_s_at	LAPTM5	lysosomal protein transmembrane 5	1p34	-0.878651	9.26325	0.000524964
213290_at	COL6A2	collagen, type VI, alpha 2	21q22.3	-0.767964	8.19961	0.000528005
207741_x_at	TPSAB1	tryptase alpha/beta 1	16p13.3	-1.35147	7.80288	0.000533912
201185_at	HTRA1	HtrA serine peptidase 1	10q26.3	-1.02834	10.714	0.000534105
37831_at	SIPA1L3	signal-induced proliferation-associated 1 like 3	19q13.13	-0.773873	8.24638	0.000534189
204430_s_at	SLC2A5	solute carrier family 2 (facilitated glucose/fructose transporter), member 5	1p36.2	-1.39572	6.43654	0.00053853
202501_at	MAPRE2	microtubule-associated protein, RP/EB family, member 2	18q12.1	-0.731196	8.81245	0.000541657
219103_at	ASAP3	ArfGAP with SH3 domain, ankyrin repeat and PH domain 3	1p36.12	-0.976773	7.23259	0.000541707
201224_s_at	SRRM1	serine/arginine repetitive matrix 1	1p36.11	-1.00066	7.83898	0.000543003
209633_at	PPP2R3A	protein phosphatase 2, regulatory subunit B'', alpha	3q22.1	-1.02604	8.24301	0.000543488
205488_at	GZMA	granzyme A (granzyme 1, cytotoxic T-lymphocyte-associated serine esterase 3)	5q11-q12	-1.22656	7.38168	0.00055047
205507_at	ARHGEF15	Rho guanine nucleotide exchange factor (GEF) 15	17p13.1	-0.618973	8.08933	0.000555695
215978_x_at	ZNF721	zinc finger protein 721	4p16.3	-0.83544	11.4802	0.00055591
204237_at	GULP1	GULP, engulfment adaptor PTB domain containing 1	2q32.3-q33	-1.21027	7.39002	0.000559016
213154_s_at	BICD2	bicaudal D homolog 2 (Drosophila)	9q22.31	-0.705865	9.25306	0.000561804
219102_at	RCN3	reticulocalbin 3, EF-hand calcium binding domain	19q13.33	-1.25228	6.73991	0.000564805
207943_x_at	PLAGL1	pleiomorphic adenoma gene-like 1	6q24-q25	-1.12635	7.75479	0.000568601
212794_s_at	KIAA1033	KIAA1033	12q24.11	-1.13396	8.35358	0.000574749
201042_at	TGM2	transglutaminase 2 (C polypeptide, protein-glutamine-gamma-glutamyltransferase)	20q12	-0.788815	9.89056	0.000576311
215306_at				-1.53472	6.78288	0.000576473
221750_at	HMGCS1	3-hydroxy-3-methylglutaryl-CoA synthase 1 (soluble)	5p14-p13	-0.863197	9.09644	0.000579837
214464_at	CDC42BPA	CDC42 binding protein kinase alpha (DMPK-like)	1q42.11	-1.36778	8.58364	0.000581648
204440_at	CD83	CD83 molecule	6p23	-0.714939	8.74024	0.00058228
202746_at	ITM2A	integral membrane protein 2A	Xq13.3-Xq21.2	-1.25581	7.71336	0.000583338
218859_s_at	ESF1	ESF1, nucleolar pre-rRNA processing protein, homolog (S. cerevisiae)	20p12.1	-0.90092	8.86822	0.000586108
201980_s_at	RSU1	Ras suppressor protein 1	10p13	-0.610851	9.20649	0.000590683
213940_s_at	FNBP1	formin binding protein 1	9q34	-0.65929	8.43858	0.000591454
37005_at	NBL1	neuroblastoma, suppression of tumorigenicity 1	1p36.13	-0.730476	11.4944	0.000606803
206147_x_at	SCML2	sex comb on midleg-like 2 (Drosophila)	Xp22	-0.681667	7.93284	0.000607489
203438_at	STC2	stanniocalcin 2	5q35.1	-1.27227	6.6184	0.000608424
65718_at	GPR124	G protein-coupled receptor 124	8p11.23	-0.87139	7.99003	0.000612355
204964_s_at	SSPN	sarcospan (Kras oncogene-associated gene)	12p11.2	-1.53231	6.87158	0.000618776
205644_s_at	SNRPG	small nuclear ribonucleoprotein polypeptide G	2p13.3	-0.745936	11.83	0.000620161
204716_at	CCDC6	coiled-coil domain containing 6	10q21	-0.669166	7.4391	0.000620741
201581_at	TMX4	thioredoxin-related transmembrane protein 4	20p12	-0.871789	8.73225	0.000629887
203741_s_at	ADCY7	adenylate cyclase 7	16q12.1	-1.31175	7.07638	0.000629887
211986_at	AHNAK	AHNAK nucleoprotein	11q12.2	-0.782409	12.1772	0.000630503
215541_s_at	DIAPH1	diaphanous homolog 1 (Drosophila)	5q31	-1.11834	7.30514	0.000632056
203710_at	ITPR1	inositol 1,4,5-triphosphate receptor, type 1	3p26.1	-1.43379	7.32292	0.000638624
201545_s_at	PABPN1	poly(A) binding protein, nuclear 1	14q11.2-q13	-0.795115	8.94077	0.000640218
205068_s_at	ARHGAP26	Rho GTPase activating protein 26	5q31	-0.629214	7.89469	0.000646274
219298_at	ECHDC3	enoyl CoA hydratase domain containing 3	10p14	-1.43274	6.76018	0.00064717
203915_at	CXCL9	chemokine (C-X-C motif) ligand 9	4q21	-1.6944	8.85684	0.000647429
207030_s_at	CSRP2	cysteine and glycine-rich protein 2	12q21.1	-1.18075	10.0508	0.000649918
208246_x_at				-0.723474	11.4673	0.000652198
204134_at	PDE2A	phosphodiesterase 2A, cGMP-stimulated	11q13.4	-1.19281	7.66567	0.000661306
219167_at	RASL12	RAS-like, family 12	15q11.2-q22.33	-1.10106	8.06162	0.000661752
202780_at	OXCT1	3-oxoacid CoA transferase 1	5p13.1	-1.07734	8.62394	0.000665709
212506_at	PICALM	phosphatidylinositol binding clathrin assembly protein	11q14	-0.64298	10.0211	0.000665709
221011_s_at	LBH	limb bud and heart development homolog (mouse)	2p23.1	-0.678477	9.12091	0.000670133
213474_at	KCTD7	potassium channel tetramerisation domain containing 7	7q11.21	-0.973034	7.52985	0.000680437
209374_s_at	IGHM	immunoglobulin heavy constant mu	14q32.33	-1.8991	8.92071	0.000682136
200621_at	CSRP1	cysteine and glycine-rich protein 1	1q32	-1.01973	11.6598	0.000685724
221584_s_at	KCNMA1	potassium large conductance calcium-activated channel, subfamily M, alpha member 1	10q22.3	-1.74959	7.9107	0.000688503
219717_at	DCAF16	DDB1 and CUL4 associated factor 16	4p15.31	-1.14348	7.07698	0.000688976
202040_s_at	KDM5A	lysine (K)-specific demethylase 5A	12p11	-0.64926	9.44366	0.000689449
212535_at				-0.610437	9.5832	0.000690678
201029_s_at	CD99	CD99 molecule	Xp22.32	-0.765056	12.2297	0.000691399
201540_at	FHL1	four and a half LIM domains 1	Xq26	-1.81824	10.3135	0.000695275
215863_at	TFR2	transferrin receptor 2	7q22	-0.749827	7.69104	0.000699559
209088_s_at	UBN1	ubinuclein 1	16p13.3	-0.669191	8.55452	0.000707204
215605_at	NCOA2	nuclear receptor coactivator 2	8q13.3	-1.08337	7.68512	0.000721703
202917_s_at	S100A8	S100 calcium binding protein A8	1q21	-2.53032	11.2712	0.000724066
49306_at	RASSF4	Ras association (RalGDS/AF-6) domain family member 4	10q11.21	-1.24397	6.58411	0.000730812
203692_s_at	E2F3	E2F transcription factor 3	6p22	-1.08946	7.57133	0.000731801
32128_at	CCL18	chemokine (C-C motif) ligand 18 (pulmonary and activation-regulated)	17q11.2	-1.74053	8.09874	0.000733606
205128_x_at	PTGS1	prostaglandin-endoperoxide synthase 1 (prostaglandin G/H synthase and cyclooxygenase)	9q32-q33.3	-1.07282	9.21911	0.000733814
203620_s_at	FCHSD2	FCH and double SH3 domains 2	11q13.4	-0.954704	7.67593	0.000736272
212636_at	QKI	quaking homolog, KH domain RNA binding (mouse)	6q26	-1.15714	7.8128	0.000740077
221870_at	EHD2	EH-domain containing 2	19q13.3	-1.63256	7.4619	0.000740638
210401_at	P2RX1	purinergic receptor P2X, ligand-gated ion channel, 1	17p13.3	-1.08349	7.77958	0.000740638
214081_at	PLXDC1	plexin domain containing 1	17q21.1	-0.815635	7.92733	0.000741578
205967_at	HIST1H4C	histone cluster 1, H4c	6p21.3	-1.22186	8.94437	0.000742835
208018_s_at	HCK	hemopoietic cell kinase	20q11-q12	-1.11481	7.46587	0.000742835
201918_at	SLC25A36	solute carrier family 25, member 36	3q23	-1.35765	8.32248	0.000745681
209183_s_at	C10orf10	chromosome 10 open reading frame 10	10q11.21	-0.93778	10.1965	0.000746384
217052_x_at				-0.849178	7.92577	0.000748007
221080_s_at	DENND1C	DENN/MADD domain containing 1C	19p13.3	-0.620987	7.74736	0.000748854
201683_x_at	TOX4	TOX high mobility group box family member 4	14q11.2	-1.09927	7.28385	0.00074928
37966_at	PARVB	parvin, beta	22q13.2-q13.33	-0.940461	7.13349	0.00074928
200931_s_at	VCL	vinculin	10q22.2	-0.689439	11.9918	0.000765262
213288_at	MBOAT2	membrane bound O-acyltransferase domain containing 2	2p25.1	-0.662294	8.72767	0.000772759
218196_at	OSTM1	osteopetrosis associated transmembrane protein 1	6q21	-0.835397	8.07219	0.000775705
222339_x_at				-1.08464	7.4256	0.000780092
209939_x_at	CFLAR	CASP8 and FADD-like apoptosis regulator	2q33-q34	-0.729758	9.65468	0.000784152
200974_at	ACTA2	actin, alpha 2, smooth muscle, aorta	10q23.3	-1.4403	12.3912	0.000784152
201599_at	OAT	ornithine aminotransferase	10q26	-1.18196	9.38355	0.000784152
45297_at	EHD2	EH-domain containing 2	19q13.3	-0.800022	8.64574	0.000784788
209734_at	NCKAP1L	NCK-associated protein 1-like	12q13.1	-0.858408	7.97145	0.000785747
201667_at	GJA1	gap junction protein, alpha 1, 43kDa	6q21-q23.2	-1.16647	10.9257	0.000791942
212195_at	IL6ST	interleukin 6 signal transducer (gp130, oncostatin M receptor)	5q11	-1.02914	10.173	0.000792244
213194_at	ROBO1	roundabout, axon guidance receptor, homolog 1 (Drosophila)	3p12	-1.19008	8.8515	0.000795409
218418_s_at	KANK2	KN motif and ankyrin repeat domains 2	19p13.2	-0.961145	10.068	0.000802192
211612_s_at	IL13RA1	interleukin 13 receptor, alpha 1	Xq24	-0.602867	8.06833	0.00080916
215907_at				-0.653829	8.38495	0.00080916
213311_s_at	TCF25	transcription factor 25 (basic helix-loop-helix)	16q24.3	-1.02131	8.72873	0.00081075
219540_at	ZNF267	zinc finger protein 267	16p11.2	-0.608025	7.91864	0.000813062
202619_s_at	PLOD2	procollagen-lysine, 2-oxoglutarate 5-dioxygenase 2	3q24	-1.09243	8.62453	0.000822619
203854_at	CFI	complement factor I	4q25	-1.06041	7.8737	0.000822777
213418_at	HSPA6	heat shock 70kDa protein 6 (HSP70B')	1q23	-0.900844	8.94743	0.000825957
220955_x_at	RAB23	RAB23, member RAS oncogene family	6p11	-1.55411	6.23692	0.000831348
214463_x_at				-1.62005	7.55447	0.000836781
211742_s_at	EVI2B	ecotropic viral integration site 2B	17q11.2	-1.05499	7.28404	0.00083853
200986_at	SERPING1	serpin peptidase inhibitor, clade G (C1 inhibitor), member 1	11q12-q13.1	-1.05607	10.3532	0.000843648
212208_at	MED13L	mediator complex subunit 13-like	12q24.21	-0.770647	8.78427	0.000848563
206467_x_at				-0.87794	8.0636	0.000851424
216550_x_at	ANKRD12	ankyrin repeat domain 12	18p11.22	-0.920544	7.56128	0.000861126
213850_s_at	SRSF2IP	serine/arginine-rich splicing factor 2, interacting protein	12q12	-0.716331	10.1464	0.000864151
213725_x_at	XYLT1	xylosyltransferase I	16p12.3	-1.03036	7.34419	0.000867488
202626_s_at	LYN	v-yes-1 Yamaguchi sarcoma viral related oncogene homolog	8q13	-0.894355	8.04088	0.000873714
209087_x_at	MCAM	melanoma cell adhesion molecule	11q23.3	-0.892812	10.168	0.000881373
214149_s_at	ATP6V0E1	ATPase, H+ transporting, lysosomal 9kDa, V0 subunit e1	5q35.1	-0.935634	7.42994	0.000883855
206697_s_at	HP	haptoglobin	16q22.1	-1.32883	6.45918	0.000895712
211208_s_at	CASK	calcium/calmodulin-dependent serine protein kinase (MAGUK family)	Xp11.4	-0.657936	9.65401	0.000899311
221985_at	KLHL24	kelch-like 24 (Drosophila)	3q27.1	-0.641151	8.51647	0.000903731
218273_s_at	PDP1	pyruvate dehyrogenase phosphatase catalytic subunit 1	8q22.1	-0.934975	7.4399	0.000906465
207426_s_at	TNFSF4	tumor necrosis factor (ligand) superfamily, member 4	1q25	-1.08734	6.80937	0.000908328
218053_at	PRPF40A	PRP40 pre-mRNA processing factor 40 homolog A (S. cerevisiae)	2q23.3	-0.877541	9.94549	0.00090955
208306_x_at	HLA-DRB4	major histocompatibility complex, class II, DR beta 4	6p21.3	-0.991795	12.8207	0.000909558
207002_s_at	PLAGL1	pleiomorphic adenoma gene-like 1	6q24-q25	-1.49892	6.86812	0.000911513
204040_at	RNF144A	ring finger protein 144A	2p25.2	-1.14421	7.90721	0.000914622
202768_at	FOSB	FBJ murine osteosarcoma viral oncogene homolog B	19q13.32	-2.28335	9.03213	0.000918865
210036_s_at	KCNH2	potassium voltage-gated channel, subfamily H (eag-related), member 2	7q36.1	-0.807573	8.14917	0.000920866
219165_at	PDLIM2	PDZ and LIM domain 2 (mystique)	8p21.2	-0.690232	8.68719	0.000920866
203324_s_at	CAV2	caveolin 2	7q31.1	-0.967035	9.22651	0.000922525
210561_s_at	WSB1	WD repeat and SOCS box-containing 1	17q11.1	-1.40197	9.59234	0.000927488
221019_s_at	COLEC12	collectin sub-family member 12	18pter-p11.3	-0.755824	7.97845	0.000941272
219213_at	JAM2	junctional adhesion molecule 2	21q21.2	-0.868174	7.91617	0.000950504
202274_at	ACTG2	actin, gamma 2, smooth muscle, enteric	2p13.1	-2.08148	10.868	0.000952412
210972_x_at				-0.769896	8.08966	0.000955737
202351_at	ITGAV	integrin, alpha V (vitronectin receptor, alpha polypeptide, antigen CD51)	2q31-q32	-0.694347	10.6212	0.000959662
221830_at	RAP2A	RAP2A, member of RAS oncogene family	13q34	-1.5341	8.14152	0.000959662
211737_x_at	PTN	pleiotrophin	7q33	-1.61039	8.57833	0.00096448
212858_at	PAQR4	progestin and adipoQ receptor family member IV	16p13.3	-0.817239	8.30513	0.000968233
213742_at	SRSF11	serine/arginine-rich splicing factor 11	1p31	-1.22243	7.4664	0.00097534
219426_at	EIF2C3	eukaryotic translation initiation factor 2C, 3	1p34.3	-0.754362	7.56392	0.000975571
212262_at	QKI	quaking homolog, KH domain RNA binding (mouse)	6q26	-0.689624	8.06301	0.000977815
218927_s_at	CHST12	carbohydrate (chondroitin 4) sulfotransferase 12	7p22	-0.701505	8.04141	0.000979857
212472_at	MICAL2	microtubule associated monoxygenase, calponin and LIM domain containing 2	11p15.3	-0.77492	9.46695	0.000979857
212975_at	DENND3	DENN/MADD domain containing 3	8q24.3	-0.607626	8.16187	0.00099214
203388_at	ARRB2	arrestin, beta 2	17p13	-1.3348	6.65777	0.000994005
213650_at				-1.12502	7.77457	0.000997414
202206_at	ARL4C	ADP-ribosylation factor-like 4C	2q37.1	-0.899089	8.02245	0.000997414
201603_at	PPP1R12A	protein phosphatase 1, regulatory (inhibitor) subunit 12A	12q15-q21	-0.764971	9.59882	0.000999445
218847_at	IGF2BP2	insulin-like growth factor 2 mRNA binding protein 2	3q27.2	-1.00524	8.91592	0.00100287
218820_at	C14orf132	chromosome 14 open reading frame 132	14q32.2	-1.13178	7.08583	0.00100698
209466_x_at	PTN	pleiotrophin	7q33	-1.15526	9.32289	0.00102006
215147_at				-1.06198	6.59004	0.0010236
201152_s_at	MBNL1	muscleblind-like (Drosophila)	3q25	-1.22334	9.9529	0.00102856
213048_s_at				-0.804474	11.0824	0.00103146
205648_at	WNT2	wingless-type MMTV integration site family member 2	7q31.2	-1.34847	7.09291	0.00103561
202468_s_at	CTNNAL1	catenin (cadherin-associated protein), alpha-like 1	9q31.2	-0.821077	9.07145	0.0010363
216563_at	ANKRD12	ankyrin repeat domain 12	18p11.22	-1.04936	7.36936	0.00104067
219607_s_at	MS4A4A	membrane-spanning 4-domains, subfamily A, member 4	11q12	-1.41372	7.08782	0.00104173
215750_at	KIAA1659	KIAA1659 protein		-0.90282	7.15826	0.00104296
213596_at	CASP4	caspase 4, apoptosis-related cysteine peptidase	11q22.2-q22.3	-0.64294	7.88734	0.00104561
200958_s_at	SDCBP	syndecan binding protein (syntenin)	8q12	-0.625141	11.2524	0.00105798
214724_at	DIXDC1	DIX domain containing 1	11q23.1	-1.77441	5.99563	0.00106829
205308_at	FAM164A	family with sequence similarity 164, member A	8q21.12	-0.646117	8.4905	0.00107912
221496_s_at	TOB2	transducer of ERBB2, 2	22q13.2	-1.38145	6.67052	0.00108203
209379_s_at	FAM190B	family with sequence similarity 190, member B	10q23.1	-0.650893	8.34244	0.00108429
201539_s_at	FHL1	four and a half LIM domains 1	Xq26	-1.48175	7.4148	0.00108728
203381_s_at	APOE	apolipoprotein E	19q13.2	-1.36087	8.25103	0.00109023
219799_s_at	DHRS9	dehydrogenase/reductase (SDR family) member 9	2q31.1	-1.29709	7.22973	0.00109074
204854_at				-1.07243	7.20306	0.00109296
205870_at	BDKRB2	bradykinin receptor B2	14q32.1-q32.2	-0.93493	8.12523	0.00110176
210225_x_at				-1.04048	6.98802	0.00110176
205132_at	ACTC1	actin, alpha, cardiac muscle 1	15q11-q14	-1.72679	9.29099	0.00111072
208901_s_at	TOP1	topoisomerase (DNA) I	20q12-q13.1	-0.723388	10.2372	0.00111422
206929_s_at	NFIC	nuclear factor I/C (CCAAT-binding transcription factor)	19p13.3	-1.17503	7.33339	0.00113048
208624_s_at	EIF4G1	eukaryotic translation initiation factor 4 gamma, 1	3q27-qter	-0.71817	7.89078	0.0011417
202082_s_at	SEC14L1	SEC14-like 1 (S. cerevisiae)	17q25.2	-0.943161	7.32098	0.00114728
217803_at	GOLPH3	golgi phosphoprotein 3 (coat-protein)	5p13.3	-0.628029	10.262	0.00114952
221872_at	RARRES1	retinoic acid receptor responder (tazarotene induced) 1	3q25.32	-1.78643	9.55931	0.00115687
212251_at	MTDH	metadherin	8q22.1	-0.61609	10.6988	0.00115974
210987_x_at	TPM1	tropomyosin 1 (alpha)	15q22.1	-1.15215	11.6849	0.00116187
206100_at	CPM	carboxypeptidase M	12q14.3	-1.54843	6.32819	0.00116938
211992_at	WNK1	WNK lysine deficient protein kinase 1	12p13.3	-0.835802	8.71594	0.00118096
220691_at				-1.12179	6.70658	0.00118395
212358_at	CLIP3	CAP-GLY domain containing linker protein 3	19q13.12	-1.09531	7.54353	0.00118807
209436_at	SPON1	spondin 1, extracellular matrix protein	11p15.2	-1.09341	9.05963	0.0012006
201445_at	CNN3	calponin 3, acidic	1p22-p21	-0.98009	8.78596	0.00120248
204834_at	FGL2	fibrinogen-like 2	7q11.23	-1.04155	7.83854	0.00121427
203535_at	S100A9	S100 calcium binding protein A9	1q21	-2.15554	11.2229	0.00121532
204298_s_at	LOX	lysyl oxidase	5q23.2	-1.36197	6.59016	0.00121532
202728_s_at	LTBP1	latent transforming growth factor beta binding protein 1	2p22-p21	-1.2921	6.77151	0.00122065
214352_s_at	KRAS	v-Ki-ras2 Kirsten rat sarcoma viral oncogene homolog	12p12.1	-0.975852	9.55064	0.00123344
202034_x_at	RB1CC1	RB1-inducible coiled-coil 1	8q11	-0.624652	7.77481	0.00124753
212091_s_at	COL6A1	collagen, type VI, alpha 1	21q22.3	-1.66786	7.64151	0.0012516
204057_at	IRF8	interferon regulatory factor 8	16q24.1	-1.02657	7.94028	0.0012596
215336_at	AKAP11	A kinase (PRKA) anchor protein 11	13q14.11	-0.84298	7.24056	0.00125962
213686_at				-0.681443	7.58269	0.00127274
214403_x_at	SPDEF	SAM pointed domain containing ets transcription factor	6p21.3	-0.770017	8.00104	0.00128383
209209_s_at	FERMT2	fermitin family member 2	14q22.1	-1.38333	6.84709	0.00129122
218663_at	NCAPG	non-SMC condensin I complex, subunit G	4p15.33	-1.30627	7.09801	0.00129708
212558_at	SPRY1	sprouty homolog 1, antagonist of FGF signaling (Drosophila)	4q28.1	-0.764179	8.90444	0.00130749
202412_s_at	USP1	ubiquitin specific peptidase 1	1p31.3	-1.58223	6.48699	0.00131454
202880_s_at	CYTH1	cytohesin 1	17q25	-0.610339	8.97363	0.00131939
200887_s_at	STAT1	signal transducer and activator of transcription 1, 91kDa	2q32.2	-0.832833	11.4095	0.00132972
215116_s_at	DNM1	dynamin 1	9q34	-0.918995	8.38569	0.00133073
208103_s_at	ANP32E	acidic (leucine-rich) nuclear phosphoprotein 32 family, member E	1q21.2	-0.862278	7.55956	0.00133144
209199_s_at	MEF2C	myocyte enhancer factor 2C	5q14	-0.896271	8.02471	0.00133786
218542_at	CEP55	centrosomal protein 55kDa	10q23.33	-1.13528	7.71471	0.00134723
204787_at	VSIG4	V-set and immunoglobulin domain containing 4	Xq12-q13.3	-0.856586	8.98009	0.00134911
222303_at				-0.950334	9.75032	0.00135903
212667_at	SPARC	secreted protein, acidic, cysteine-rich (osteonectin)	5q31.3-q32	-0.994087	10.4843	0.00136121
35436_at	GOLGA2	golgin A2	9q34.11	-1.03843	8.12517	0.00136474
203923_s_at	CYBB	cytochrome b-245, beta polypeptide	Xp21.1	-0.778124	7.63797	0.00136474
221641_s_at	ACOT9	acyl-CoA thioesterase 9	Xp22.11	-0.769369	9.06194	0.00136959
221505_at	ANP32E	acidic (leucine-rich) nuclear phosphoprotein 32 family, member E	1q21.2	-0.661519	9.91042	0.00137286
36030_at	IFFO1	intermediate filament family orphan 1	12p13.3	-0.794845	8.28971	0.00137286
209376_x_at	SRSF2IP	serine/arginine-rich splicing factor 2, interacting protein	12q12	-0.670679	9.65555	0.00137352
216840_s_at	LAMA2	laminin, alpha 2	6q22-q23	-1.26144	6.70539	0.0013812
214617_at	PRF1	perforin 1 (pore forming protein)	10q22	-0.908736	7.60951	0.00140087
208120_x_at				-0.750194	9.9467	0.001401
215179_x_at	PGF	placental growth factor	14q24.3	-0.612251	11.0844	0.00140647
202800_at	SLC1A3	solute carrier family 1 (glial high affinity glutamate transporter), member 3	5p13	-1.32204	7.89736	0.00140647
209763_at	CHRDL1	chordin-like 1	Xq23	-1.68313	7.24839	0.00142298
212650_at	EHBP1	EH domain binding protein 1	2p15	-1.27372	6.40553	0.00142359
204929_s_at	VAMP5	vesicle-associated membrane protein 5 (myobrevin)	2p11.2	-0.785991	8.64381	0.00142549
211571_s_at	VCAN	versican	5q14.3	-1.45461	7.57795	0.00144658
219882_at	TTLL7	tubulin tyrosine ligase-like family, member 7	1p31.1	-1.0734	6.94336	0.00145228
202413_s_at	USP1	ubiquitin specific peptidase 1	1p31.3	-0.684264	9.98371	0.00145879
219874_at	SLC12A8	solute carrier family 12 (potassium/chloride transporters), member 8	3q21.2	-0.793857	7.77771	0.00146836
216841_s_at	SOD2	superoxide dismutase 2, mitochondrial	6q25.3	-0.990597	7.43195	0.00147076
200953_s_at	CCND2	cyclin D2	12p13	-0.981144	9.76849	0.00150912
214730_s_at	GLG1	golgi glycoprotein 1	16q22.3	-0.618432	9.56936	0.00152042
208930_s_at	ILF3	interleukin enhancer binding factor 3, 90kDa	19p13.2	-1.75666	6.27924	0.00152901
203881_s_at	DMD	dystrophin	Xp21.2	-1.36649	6.98094	0.00153914
210273_at	PCDH7	protocadherin 7	4p15	-0.837116	8.05743	0.00153914
209875_s_at	SPP1	secreted phosphoprotein 1	4q22.1	-1.55498	10.377	0.00154606
220725_x_at	DNAH3	dynein, axonemal, heavy chain 3	16p12.3	-0.637579	9.23093	0.00155052
203766_s_at	LMOD1	leiomodin 1 (smooth muscle)	1q32	-2.28422	7.81301	0.00156301
208788_at	ELOVL5	ELOVL family member 5, elongation of long chain fatty acids (FEN1/Elo2, SUR4/Elo3-like, yeast)	6p21.1-p12.1	-0.634783	10.1324	0.00156808
212765_at	CAMSAP1L1	calmodulin regulated spectrin-associated protein 1-like 1	1q32.1	-0.67393	9.8453	0.00156915
208610_s_at	SRRM2	serine/arginine repetitive matrix 2	16p13.3	-0.777392	10.6774	0.00157434
209515_s_at	RAB27A	RAB27A, member RAS oncogene family	15q15-q21.1	-1.00617	8.11349	0.00157671
209780_at	PHTF2	putative homeodomain transcription factor 2	7q11.23-q21	-0.699159	9.06782	0.00157858
205758_at	CD8A	CD8a molecule	2p12	-0.938817	8.12906	0.00158331
209184_s_at	IRS2	insulin receptor substrate 2	13q34	-0.644166	8.96709	0.00159415
218319_at	PELI1	pellino homolog 1 (Drosophila)	2p13.3	-0.791792	9.22903	0.00160087
204615_x_at	IDI1	isopentenyl-diphosphate delta isomerase 1	10p15.3	-0.642901	9.82058	0.0016138
205624_at	CPA3	carboxypeptidase A3 (mast cell)	3q21-q25	-1.24442	8.0748	0.00161492
201601_x_at	IFITM1	interferon induced transmembrane protein 1 (9-27)	11p15.5	-1.19441	11.3478	0.00162461
213813_x_at				-1.00134	7.45464	0.00162462
221006_s_at	SNX27	sorting nexin family member 27	1q21.3	-0.758283	7.89134	0.00166859
206216_at	SRPK3	SRSF protein kinase 3	Xq28	-0.769592	7.36228	0.00167079
204858_s_at	TYMP	thymidine phosphorylase	22q13	-0.852541	8.67297	0.00168505
205236_x_at	SOD3	superoxide dismutase 3, extracellular	4p15.3-p15.1	-0.850097	8.73197	0.00168512
203562_at	FEZ1	fasciculation and elongation protein zeta 1 (zygin I)	11q24.2	-0.791965	8.84469	0.0016877
212160_at	XPOT	exportin, tRNA (nuclear export receptor for tRNAs)	12q14.2	-0.615435	9.20056	0.00169704
213925_at	C1orf95	chromosome 1 open reading frame 95	1q42.12	-1.05976	6.94457	0.00171323
201261_x_at	BGN	biglycan	Xq28	-1.18685	10.3708	0.00171532
221671_x_at				-1.56867	13.5605	0.00172918
209527_at	EXOSC2	exosome component 2	9q34	-0.711315	8.06977	0.00172925
210089_s_at	LAMA4	laminin, alpha 4	6q21	-1.31943	6.61638	0.00174645
221651_x_at				-1.48312	13.6758	0.00177031
208896_at	DDX18	DEAD (Asp-Glu-Ala-Asp) box polypeptide 18	2q14.1	-0.878788	7.76031	0.00177031
208335_s_at	DARC	Duffy blood group, chemokine receptor	1q21-q22	-1.94463	7.01002	0.00178334
212724_at	RND3	Rho family GTPase 3	2q23.3	-0.813762	10.6648	0.00178867
204829_s_at	FOLR2	folate receptor 2 (fetal)	11q13.3-q13.5	-1.12577	8.09262	0.00179699
203760_s_at	SLA	Src-like-adaptor	8q22.3-qter	-1.40301	6.38899	0.00179928
201409_s_at	PPP1CB	protein phosphatase 1, catalytic subunit, beta isozyme	2p23	-0.693279	9.75788	0.00181791
209457_at	DUSP5	dual specificity phosphatase 5	10q25	-0.726292	9.53014	0.00182613
212951_at	GPR116	G protein-coupled receptor 116	6p12.3	-1.21392	7.03622	0.00184289
217094_s_at	ITCH	itchy E3 ubiquitin protein ligase homolog (mouse)	20q11.22	-0.799935	7.96309	0.0018805
202701_at	BMP1	bone morphogenetic protein 1	8p21.3	-0.748645	8.23203	0.00188481
209651_at	TGFB1I1	transforming growth factor beta 1 induced transcript 1	16p11.2	-0.813775	9.60957	0.00188646
204558_at	RAD54L	RAD54-like (S. cerevisiae)	1p32	-1.00979	6.8224	0.00192144
211635_x_at				-1.24576	6.51174	0.00193937
203232_s_at	ATXN1	ataxin 1	6p23	-0.886065	8.75234	0.00195995
211105_s_at	NFATC1	nuclear factor of activated T-cells, cytoplasmic, calcineurin-dependent 1	18q23	-0.783432	8.26185	0.00197574
202435_s_at	CYP1B1	cytochrome P450, family 1, subfamily B, polypeptide 1	2p21	-1.24438	7.07287	0.00198828
203318_s_at	ZNF148	zinc finger protein 148	3q21	-0.886268	8.97428	0.00199819
205943_at	TDO2	tryptophan 2,3-dioxygenase	4q31-q32	-0.9281	7.50508	0.00200006
202124_s_at	TRAK2	trafficking protein, kinesin binding 2	2q33	-1.14596	7.03512	0.00200152
221447_s_at	GLT8D2	glycosyltransferase 8 domain containing 2	12q	-0.792705	8.02344	0.00200597
209365_s_at	ECM1	extracellular matrix protein 1	1q21	-0.666779	9.08065	0.00206693
209312_x_at				-0.962845	12.1857	0.00207988
211581_x_at	LST1	leukocyte specific transcript 1	6p21.3	-0.964426	6.9423	0.00207988
218573_at	MAGEH1	melanoma antigen family H, 1	Xp11.21	-0.914191	8.09137	0.00212274
213560_at	GADD45B	growth arrest and DNA-damage-inducible, beta	19p13.3	-0.890002	7.45707	0.00213562
221802_s_at	KIAA1598	KIAA1598	10q25.3	-0.954349	7.62023	0.00215142
215501_s_at	DUSP10	dual specificity phosphatase 10	1q41	-0.77347	8.03037	0.00216465
218280_x_at				-0.891108	10.3488	0.00217391
212192_at	KCTD12	potassium channel tetramerisation domain containing 12	13q22.3	-1.11807	9.18508	0.00217797
202336_s_at	PAM	peptidylglycine alpha-amidating monooxygenase	5q14-q21	-0.812364	10.3679	0.00217797
204115_at	GNG11	guanine nucleotide binding protein (G protein), gamma 11	7q21	-0.889375	8.99252	0.00219362
207165_at	HMMR	hyaluronan-mediated motility receptor (RHAMM)	5q33.2-qter	-1.03901	7.85252	0.00219409
209884_s_at	SLC4A7	solute carrier family 4, sodium bicarbonate cotransporter, member 7	3p22	-0.703297	7.69739	0.00219409
218553_s_at	KCTD15	potassium channel tetramerisation domain containing 15	19q13.11	-0.67671	7.97809	0.00219996
218979_at	RMI1	RMI1, RecQ mediated genome instability 1, homolog (S. cerevisiae)	9q21.32	-0.759215	7.99951	0.00220102
205098_at	CCR1	chemokine (C-C motif) receptor 1	3p21	-0.679488	8.14614	0.00220558
210133_at	CCL11	chemokine (C-C motif) ligand 11	17q21.1-q21.2	-1.18408	7.794	0.00223099
214175_x_at	PDLIM4	PDZ and LIM domain 4	5q31.1	-1.4041	8.17706	0.00223833
218357_s_at	TIMM8B	translocase of inner mitochondrial membrane 8 homolog B (yeast)	11q23.1-q23.2	-0.622203	11.776	0.00225501
204662_at	CP110	CP110 protein	16p12.3	-0.661192	8.3581	0.00225501
220374_at	KLHL28	kelch-like 28 (Drosophila)	14q21.2	-1.24178	6.37706	0.0022653
204271_s_at	EDNRB	endothelin receptor type B	13q22	-0.852691	7.57502	0.00226588
203346_s_at	MTF2	metal response element binding transcription factor 2	1p22.1	-0.780617	8.70813	0.00228265
209318_x_at	PLAGL1	pleiomorphic adenoma gene-like 1	6q24-q25	-0.864309	7.84725	0.00228543
210038_at	PRKCQ	protein kinase C, theta	10p15	-0.993268	7.20837	0.00229047
203883_s_at	RAB11FIP2	RAB11 family interacting protein 2 (class I)	10q26.11	-0.706841	8.06257	0.00230055
207431_s_at	DEGS1	degenerative spermatocyte homolog 1, lipid desaturase (Drosophila)	1q42.11	-1.03151	7.61827	0.0023035
203153_at	IFIT1	interferon-induced protein with tetratricopeptide repeats 1	10q23.31	-1.68767	7.39023	0.002308
201626_at	INSIG1	insulin induced gene 1	7q36	-0.7764	8.51958	0.00231583
205991_s_at	PRRX1	paired related homeobox 1	1q24	-0.647902	7.54183	0.00233809
213517_at	PCBP2	poly(rC) binding protein 2	12q13.12-q13.13	-1.10217	7.74536	0.00233966
204118_at	CD48	CD48 molecule	1q21.3-q22	-0.727242	8.80104	0.00235141
211564_s_at	PDLIM4	PDZ and LIM domain 4	5q31.1	-1.09664	8.43782	0.00235729
202464_s_at	PFKFB3	6-phosphofructo-2-kinase/fructose-2,6-biphosphatase 3	10p15.1	-0.765767	9.47683	0.00236541
217998_at				-1.04062	7.11555	0.00238724
201992_s_at	KIF5B	kinesin family member 5B	10p11.22	-0.636437	8.16117	0.00240482
209246_at	ABCF2	ATP-binding cassette, sub-family F (GCN20), member 2	7q36	-0.66715	7.80554	0.00241492
203323_at	CAV2	caveolin 2	7q31.1	-0.786769	9.49149	0.00241492
204424_s_at	LMO3	LIM domain only 3 (rhombotin-like 2)	12p12.3	-1.135	8.15511	0.00241567
212758_s_at	ZEB1	zinc finger E-box binding homeobox 1	10p11.2	-1.44749	6.35307	0.00242306
211828_s_at	TNIK	TRAF2 and NCK interacting kinase	3q26.31	-1.13762	6.6144	0.00243188
203505_at	ABCA1	ATP-binding cassette, sub-family A (ABC1), member 1	9q31.1	-0.837754	9.11603	0.00243396
217662_x_at				-0.740756	7.54824	0.00243471
211919_s_at	CXCR4	chemokine (C-X-C motif) receptor 4	2q21	-0.636429	8.95522	0.00243509
212695_at	CRY2	cryptochrome 2 (photolyase-like)	11p11.2	-0.858154	7.78548	0.00244012
203424_s_at	IGFBP5	insulin-like growth factor binding protein 5	2q33-q36	-1.43158	5.8317	0.00245219
215123_at				-1.26363	7.81503	0.00245278
203595_s_at	IFIT5	interferon-induced protein with tetratricopeptide repeats 5	10q23.31	-0.936487	7.96224	0.0024553
211914_x_at	NF1	neurofibromin 1	17q11.2	-0.966254	6.65324	0.00245978
203961_at	NEBL	nebulette	10p12	-1.11799	8.57086	0.00246341
209791_at	PADI2	peptidyl arginine deiminase, type II	1p36.13	-0.830432	7.25412	0.00247776
215223_s_at	SOD2	superoxide dismutase 2, mitochondrial	6q25.3	-0.92917	9.40666	0.00248328
210356_x_at	MS4A1	membrane-spanning 4-domains, subfamily A, member 1	11q12	-1.22185	6.32244	0.00248328
206551_x_at	KLHL24	kelch-like 24 (Drosophila)	3q27.1	-0.806608	9.90426	0.00250659
207011_s_at	PTK7	PTK7 protein tyrosine kinase 7	6p21.1-p12.2	-0.689513	8.7979	0.00251214
204232_at	FCER1G	Fc fragment of IgE, high affinity I, receptor for; gamma polypeptide	1q23	-0.758851	9.30829	0.00251901
204346_s_at	RASSF1	Ras association (RalGDS/AF-6) domain family member 1	3p21.3	-0.772084	7.88083	0.00252303
208960_s_at	KLF6	Kruppel-like factor 6	10p15	-1.29509	8.68644	0.00252772
213016_at	BBX	bobby sox homolog (Drosophila)	3q13.1	-1.1825	7.75106	0.00256161
212514_x_at	DDX3X	DEAD (Asp-Glu-Ala-Asp) box polypeptide 3, X-linked	Xp11.3-p11.23	-0.811972	7.75333	0.00264155
212468_at	SPAG9	sperm associated antigen 9	17q21.33	-0.987656	7.04472	0.00266907
208663_s_at	TTC3	tetratricopeptide repeat domain 3	21q22.2	-1.09122	8.43165	0.00266907
212582_at	OSBPL8	oxysterol binding protein-like 8	12q14	-1.16385	8.66029	0.00269612
202833_s_at	SERPINA1	serpin peptidase inhibitor, clade A (alpha-1 antiproteinase, antitrypsin), member 1	14q32.1	-1.41664	7.64865	0.00273438
201422_at	IFI30	interferon, gamma-inducible protein 30	19p13.1	-1.07706	10.7585	0.00275019
202260_s_at	STXBP1	syntaxin binding protein 1	9q34.1	-0.937477	7.99409	0.00276657
205475_at	SCRG1	stimulator of chondrogenesis 1	4q34.1	-1.2172	7.8828	0.00277283
220987_s_at				-0.606312	8.08196	0.00278914
213029_at	NFIB	nuclear factor I/B	9p24.1	-0.869961	9.29619	0.00279351
210873_x_at	APOBEC3A	apolipoprotein B mRNA editing enzyme, catalytic polypeptide-like 3A	22q13.1-q13.2	-1.29239	7.08888	0.00280221
214715_x_at	ZNF160	zinc finger protein 160	19q13.42	-0.640625	11.4892	0.00282599
218683_at	PTBP2	polypyrimidine tract binding protein 2	1p21.3	-0.731385	8.01323	0.0028437
205549_at	PCP4	Purkinje cell protein 4	21q22.2	-2.39204	8.3333	0.00285495
201508_at	IGFBP4	insulin-like growth factor binding protein 4	17q12-q21.1	-0.968558	11.2104	0.00286133
214151_s_at				-0.937916	7.39859	0.00286133
206070_s_at	EPHA3	EPH receptor A3	3p11.2	-1.5697	6.0059	0.00286568
205168_at	DDR2	discoidin domain receptor tyrosine kinase 2	1q23.3	-1.11767	7.07569	0.00289829
201278_at	DAB2	disabled homolog 2, mitogen-responsive phosphoprotein (Drosophila)	5p13	-0.766605	8.98068	0.0029055
203349_s_at	ETV5	ets variant 5	3q28	-0.640317	8.3578	0.00292492
201427_s_at	SEPP1	selenoprotein P, plasma, 1	5q31	-1.10403	10.6868	0.00292679
213592_at	APLNR	apelin receptor	11q12	-1.15445	6.66958	0.00294151
220411_x_at	PODNL1	podocan-like 1	19p13.12	-0.619235	8.40837	0.0029522
205992_s_at	IL15	interleukin 15	4q31	-0.915789	7.60103	0.00296279
204891_s_at	LCK	lymphocyte-specific protein tyrosine kinase	1p34.3	-0.941586	7.49575	0.00298078
201666_at	TIMP1	TIMP metallopeptidase inhibitor 1	Xp11.3-p11.23	-0.849648	12.7372	0.00301061
213015_at	BBX	bobby sox homolog (Drosophila)	3q13.1	-0.814713	8.59503	0.0030115
209023_s_at	STAG2	stromal antigen 2	Xq25	-1.01431	7.81711	0.00305438
209626_s_at	OSBPL3	oxysterol binding protein-like 3	7p15	-0.63806	8.22114	0.0030988
212629_s_at	PKN2	protein kinase N2	1p22.2	-0.758577	9.52009	0.003116
212385_at	TCF4	transcription factor 4	18q21.1	-1.20783	6.30132	0.0031614
214370_at	S100A8	S100 calcium binding protein A8	1q21	-1.86605	5.57093	0.0031614
201070_x_at	SF3B1	splicing factor 3b, subunit 1, 155kDa	2q33.1	-0.787506	9.0783	0.0031614
209168_at	GPM6B	glycoprotein M6B	Xp22.2	-0.627653	7.71683	0.00316406
203764_at	DLGAP5	discs, large (Drosophila) homolog-associated protein 5	14q22.3	-0.964309	8.00887	0.00320623
201514_s_at	G3BP1	GTPase activating protein (SH3 domain) binding protein 1	5q33.1	-1.17428	6.71802	0.003207
206117_at	TPM1	tropomyosin 1 (alpha)	15q22.1	-1.5672	6.79509	0.00321407
205081_at	CRIP1	cysteine-rich protein 1 (intestinal)	14q32.33	-1.29047	9.83256	0.00326034
204235_s_at	GULP1	GULP, engulfment adaptor PTB domain containing 1	2q32.3-q33	-0.9798	7.20027	0.00326609
207827_x_at	SNCA	synuclein, alpha (non A4 component of amyloid precursor)	4q21	-0.691189	7.33814	0.00328799
209555_s_at	CD36	CD36 molecule (thrombospondin receptor)	7q11.2	-1.81365	6.86466	0.00329947
210298_x_at	FHL1	four and a half LIM domains 1	Xq26	-1.81147	6.93692	0.00331088
217549_at				-0.96352	6.95997	0.00333415
217272_s_at	SERPINB13	serpin peptidase inhibitor, clade B (ovalbumin), member 13	18q21.3-q22	-1.28447	7.49052	0.00335127
209136_s_at	USP10	ubiquitin specific peptidase 10	16q24.1	-0.719718	7.4776	0.00336544
216804_s_at	PDLIM5	PDZ and LIM domain 5	4q22	-1.23746	7.40052	0.0033681
218162_at	OLFML3	olfactomedin-like 3	1p13.2	-1.15417	8.59457	0.00337277
211962_s_at	ZFP36L1	zinc finger protein 36, C3H type-like 1	14q22-q24	-0.858801	10.0195	0.00337296
207463_x_at	PRSS3	protease, serine, 3	9p11.2	-1.19688	7.97611	0.00337296
202037_s_at	SFRP1	secreted frizzled-related protein 1	8p11.21	-1.30592	8.35702	0.00337926
208965_s_at	IFI16	interferon, gamma-inducible protein 16	1q22	-1.49322	7.76128	0.00339976
207277_at	CD209	CD209 molecule	19p13	-0.605762	8.02616	0.003429
205270_s_at	LCP2	lymphocyte cytosolic protein 2 (SH2 domain containing leukocyte protein of 76kDa)	5q33.1-qter	-1.0451	7.59163	0.00343604
222101_s_at	DCHS1	dachsous 1 (Drosophila)	11p15.4	-1.03433	7.85831	0.00343979
218577_at	LRRC40	leucine rich repeat containing 40	1p31.1	-0.604327	8.3438	0.00344759
208003_s_at	NFAT5	nuclear factor of activated T-cells 5, tonicity-responsive	16q22.1	-0.952299	7.6629	0.00344759
214951_at	SLC26A10	solute carrier family 26, member 10	12q13	-0.69018	7.75443	0.00345168
211135_x_at	LILRB3	leukocyte immunoglobulin-like receptor, subfamily B (with TM and ITIM domains), member 3	19q13.4	-0.979845	7.14499	0.00348862
203665_at	HMOX1	heme oxygenase (decycling) 1	22q12	-0.823552	8.4927	0.00349197
213675_at				-0.662405	8.97284	0.00353588
201621_at	NBL1	neuroblastoma, suppression of tumorigenicity 1	1p36.13	-0.622969	10.0766	0.00354437
204879_at	PDPN	podoplanin	1p36.21	-1.75467	5.33033	0.00354515
209356_x_at	EFEMP2	EGF-containing fibulin-like extracellular matrix protein 2	11q13.1	-0.705021	9.10637	0.00355805
216565_x_at				-0.802145	9.73095	0.00356397
219420_s_at	C1orf163	chromosome 1 open reading frame 163	1p32.3	-0.827985	7.28603	0.00357422
212865_s_at	COL14A1	collagen, type XIV, alpha 1	8q23	-1.35297	7.78055	0.00357422
204170_s_at	CKS2	CDC28 protein kinase regulatory subunit 2	9q22	-0.913911	10.3234	0.00358263
201133_s_at	PJA2	praja ring finger 2	5q21.3	-1.03454	8.36715	0.0036088
201137_s_at	HLA-DPB1	major histocompatibility complex, class II, DP beta 1	6p21.3	-0.868191	11.3073	0.0036204
222235_s_at				-0.756177	7.34994	0.00362181
208727_s_at	CDC42	cell division cycle 42 (GTP binding protein, 25kDa)	1p36.1	-0.682804	10.094	0.00362793
209433_s_at	PPAT	phosphoribosyl pyrophosphate amidotransferase	4q12	-0.752927	7.91856	0.00364471
209060_x_at	NCOA3	nuclear receptor coactivator 3	20q12	-0.84123	8.07302	0.00365792
202073_at	OPTN	optineurin	10p13	-0.612202	8.26598	0.00367677
216702_x_at				-1.0271	6.9769	0.00368515
214973_x_at				-0.960109	7.88252	0.00371484
219725_at	TREM2	triggering receptor expressed on myeloid cells 2	6p21.1	-1.34569	6.11692	0.00372659
222104_x_at	GTF2H3	general transcription factor IIH, polypeptide 3, 34kDa	12q24.31	-0.751055	9.34387	0.00381504
203787_at	SSBP2	single-stranded DNA binding protein 2	5q14.1	-0.781117	7.54824	0.00381506
212423_at	ZCCHC24	zinc finger, CCHC domain containing 24	10q22.3	-0.793268	8.94173	0.00381529
214305_s_at	SF3B1	splicing factor 3b, subunit 1, 155kDa	2q33.1	-0.910839	9.13659	0.00382334
204046_at	PLCB2	phospholipase C, beta 2	15q15	-0.844961	7.38307	0.00383802
209197_at	SYT11	synaptotagmin XI	1q21.2	-0.620902	7.50695	0.00385379
218236_s_at	PRKD3	protein kinase D3	2p21	-0.649943	8.13203	0.00392995
219359_at	ATHL1	ATH1, acid trehalase-like 1 (yeast)	11p15.5	-1.07349	8.54698	0.00393736
218823_s_at	KCTD9	potassium channel tetramerisation domain containing 9	8p21.1	-0.612907	7.78801	0.00398601
204894_s_at	AOC3	amine oxidase, copper containing 3 (vascular adhesion protein 1)	17q21	-1.09	8.54147	0.00402813
209885_at	RHOD	ras homolog gene family, member D	11q14.3	-1.28293	7.6255	0.00403174
213103_at	STARD13	StAR-related lipid transfer (START) domain containing 13	13q12-q13	-0.783924	7.50297	0.00403228
202796_at	SYNPO	synaptopodin	5q33.1	-0.685406	8.72732	0.00404556
214054_at	DOK2	docking protein 2, 56kDa	8p21.3	-0.998023	7.17995	0.00406074
215253_s_at	RCAN1	regulator of calcineurin 1	21q22.1-q22.2	-0.963779	7.27421	0.00406267
219297_at	WDR44	WD repeat domain 44	Xq24	-0.662906	7.50554	0.00407747
204638_at	ACP5	acid phosphatase 5, tartrate resistant	19p13.3-p13.2	-0.709223	8.9455	0.00407747
200696_s_at	GSN	gelsolin	9q33	-0.699787	11.4402	0.00409256
218825_at	EGFL7	EGF-like-domain, multiple 7	9q34.3	-0.771831	7.91116	0.00409564
213138_at	ARID5A	AT rich interactive domain 5A (MRF1-like)	2q11.2	-0.62321	8.17465	0.00409718
206061_s_at	DICER1	dicer 1, ribonuclease type III	14q32.13	-0.655613	7.95652	0.00412391
209474_s_at	ENTPD1	ectonucleoside triphosphate diphosphohydrolase 1	10q24	-0.975791	7.05292	0.00412806
218805_at	GIMAP5	GTPase, IMAP family member 5	7q36.1	-0.663425	8.76236	0.00423753
216333_x_at				-1.5239	7.70789	0.00428119
201865_x_at	NR3C1	nuclear receptor subfamily 3, group C, member 1 (glucocorticoid receptor)	5q31.3	-0.64197	9.61762	0.00428119
206481_s_at	LDB2	LIM domain binding 2	4p16	-1.2727	6.88406	0.00428651
201206_s_at	RRBP1	ribosome binding protein 1 homolog 180kDa (dog)	20p12	-0.705179	9.03124	0.00429588
205917_at	ZNF264	zinc finger protein 264	19q13.4	-0.716834	7.58172	0.00434133
203131_at	PDGFRA	platelet-derived growth factor receptor, alpha polypeptide	4q12	-1.09749	8.82798	0.00434862
202262_x_at	DDAH2	dimethylarginine dimethylaminohydrolase 2	6p21.3	-0.600538	9.2615	0.00435637
221903_s_at	CYLD	cylindromatosis (turban tumor syndrome)	16q12.1	-0.780527	8.54206	0.00438475
204318_s_at	GTSE1	G-2 and S-phase expressed 1	22q13.2-q13.3	-1.04636	7.03081	0.00439367
206991_s_at	CCR5	chemokine (C-C motif) receptor 5	3p21.31	-1.17566	6.16887	0.00442996
212551_at	CAP2	CAP, adenylate cyclase-associated protein, 2 (yeast)	6p22.3	-0.896051	7.1212	0.00444308
214196_s_at	TPP1	tripeptidyl peptidase I	11p15	-0.929139	7.29527	0.00444349
205637_s_at	SH3GL3	SH3-domain GRB2-like 3	15q24	-1.14217	6.3532	0.00444478
219157_at	KLHL2	kelch-like 2, Mayven (Drosophila)	4q21.2	-0.622843	8.68357	0.00444513
217679_x_at				-0.624745	11.8295	0.00445127
212621_at	TMEM194A	transmembrane protein 194A	12q13.3	-0.611645	8.47902	0.00445127
213298_at	NFIC	nuclear factor I/C (CCAAT-binding transcription factor)	19p13.3	-1.31025	6.02557	0.00448328
210951_x_at	RAB27A	RAB27A, member RAS oncogene family	15q15-q21.1	-0.649928	8.98203	0.00455007
203757_s_at	CEACAM6	carcinoembryonic antigen-related cell adhesion molecule 6 (non-specific cross reacting antigen)	19q13.2	-1.90096	7.35125	0.00457626
222109_at	GNL3L	guanine nucleotide binding protein-like 3 (nucleolar)-like	Xp11.22	-0.762858	7.46772	0.00458719
219510_at	POLQ	polymerase (DNA directed), theta	3q13.33	-0.839681	7.78399	0.00458732
210299_s_at	FHL1	four and a half LIM domains 1	Xq26	-1.66746	7.1276	0.00462966
202465_at	PCOLCE	procollagen C-endopeptidase enhancer	7q22	-0.863689	9.2348	0.00466106
203932_at	HLA-DMB	major histocompatibility complex, class II, DM beta	6p21.3	-0.721672	10.0373	0.00470496
203037_s_at	MTSS1	metastasis suppressor 1	8p22	-0.668404	10.516	0.00472144
201430_s_at	DPYSL3	dihydropyrimidinase-like 3	5q32	-1.05425	7.30157	0.00474755
203549_s_at	LPL	lipoprotein lipase	8p22	-1.00428	7.85965	0.00474792
214499_s_at	BCLAF1	BCL2-associated transcription factor 1	6q22-q23	-1.0753	6.83807	0.00475683
210355_at	PTHLH	parathyroid hormone-like hormone	12p12.1-p11.2	-1.58735	6.37135	0.00475894
214677_x_at				-1.54719	13.041	0.00479758
218578_at	CDC73	cell division cycle 73, Paf1/RNA polymerase II complex component, homolog (S. cerevisiae)	1q25	-0.751733	7.63983	0.00482731
206953_s_at	LPHN2	latrophilin 2	1p31.1	-0.950018	7.21984	0.00485317
209258_s_at	SMC3	structural maintenance of chromosomes 3	10q25	-1.18565	6.58687	0.00485402
213539_at	CD3D	CD3d molecule, delta (CD3-TCR complex)	11q23	-0.903859	8.92409	0.00485449
216301_at				-0.738239	7.59789	0.00491365
210074_at	CTSL2	cathepsin L2	9q22.2	-1.02894	8.13854	0.00493424
207966_s_at	GLG1	golgi glycoprotein 1	16q22.3	-0.834234	8.97891	0.00495985
202686_s_at	AXL	AXL receptor tyrosine kinase	19q13.1	-0.939449	8.76404	0.00499987
212288_at	FNBP1	formin binding protein 1	9q34	-0.747671	9.46298	0.00503249
209750_at	NR1D2	nuclear receptor subfamily 1, group D, member 2	3p24.2	-0.962474	6.93747	0.00511283
201366_at	ANXA7	annexin A7	10q22.2	-0.628248	9.2234	0.00513387
201411_s_at	PLEKHB2	pleckstrin homology domain containing, family B (evectins) member 2	2q21.1	-1.47926	5.68469	0.00522432
219367_s_at	NRP2	neuropilin 2	2q33.3	-0.700761	7.52805	0.00528828
202446_s_at	PLSCR1	phospholipid scramblase 1	3q23	-0.603334	10.5022	0.00531313
204094_s_at	TSC22D2	TSC22 domain family, member 2	3q25.1	-0.804968	8.5871	0.00531844
213797_at	RSAD2	radical S-adenosyl methionine domain containing 2	2p25.2	-1.15227	6.8906	0.00536583
200934_at	DEK	DEK oncogene	6p22.3	-0.623848	10.5496	0.00537
216033_s_at	FYN	FYN oncogene related to SRC, FGR, YES	6q21	-1.40474	6.42875	0.00538395
209715_at	CBX5	chromobox homolog 5	12q13.13	-0.952637	6.84089	0.00544033
213446_s_at	IQGAP1	IQ motif containing GTPase activating protein 1	15q26.1	-1.03299	6.8307	0.00547032
201646_at	SCARB2	scavenger receptor class B, member 2	4q21.1	-0.739857	8.16544	0.00556506
211726_s_at	FMO2	flavin containing monooxygenase 2 (non-functional)	1q24.3	-0.72264	7.59436	0.00556506
213328_at	NEK1	NIMA (never in mitosis gene a)-related kinase 1	4q33	-0.894777	7.2688	0.00556667
217025_s_at	DBN1	drebrin 1	5q35.3	-0.737158	7.74432	0.00557007
202994_s_at	FBLN1	fibulin 1	22q13.31	-1.37615	9.77725	0.00564415
207961_x_at	MYH11	myosin, heavy chain 11, smooth muscle	16p13.11	-2.03726	9.49443	0.00569082
207172_s_at	CDH11	cadherin 11, type 2, OB-cadherin (osteoblast)	16q22.1	-1.24028	6.58657	0.00571214
204793_at	GPRASP1	G protein-coupled receptor associated sorting protein 1	Xq22.1	-0.819215	7.72847	0.00573462
219511_s_at	SNCAIP	synuclein, alpha interacting protein	5q23.2	-1.07308	6.50025	0.00574617
211993_at	WNK1	WNK lysine deficient protein kinase 1	12p13.3	-0.946899	7.23382	0.00586228
208580_x_at				-1.3552	6.68833	0.00587
214511_x_at	FCGR1B	Fc fragment of IgG, high affinity Ib, receptor (CD64)	1p11.2	-0.949647	7.56504	0.00592619
203151_at	MAP1A	microtubule-associated protein 1A	15q15.3	-0.612234	8.20024	0.0059311
203685_at	BCL2	B-cell CLL/lymphoma 2	18q21.3	-0.710768	7.76168	0.0059311
212268_at	SERPINB1	serpin peptidase inhibitor, clade B (ovalbumin), member 1	6p25	-0.862155	9.38043	0.005933
210220_at	FZD2	frizzled homolog 2 (Drosophila)	17q21.1	-0.828788	7.37335	0.00594853
216207_x_at				-1.09057	10.3718	0.00595504
206662_at	GLRX	glutaredoxin (thioltransferase)	5q14	-0.911618	9.85827	0.00595577
209924_at	CCL18	chemokine (C-C motif) ligand 18 (pulmonary and activation-regulated)	17q11.2	-1.29324	8.73622	0.00597241
200756_x_at	CALU	calumenin	7q32.1	-0.692102	7.83866	0.00601193
211503_s_at	RAB14	RAB14, member RAS oncogene family	9q32-q34.11	-0.707841	9.24858	0.0060445
217523_at	CD44	CD44 molecule (Indian blood group)	11p13	-1.32839	7.4097	0.00606121
221922_at	GPSM2	G-protein signaling modulator 2	1p13.3	-0.767467	8.26062	0.00606972
200795_at	SPARCL1	SPARC-like 1 (hevin)	4q22.1	-0.970059	11.3718	0.00620377
219549_s_at	RTN3	reticulon 3	11q13	-0.610467	9.74634	0.0062501
209644_x_at	CDKN2A	cyclin-dependent kinase inhibitor 2A (melanoma, p16, inhibits CDK4)	9p21	-1.09884	9.20923	0.00636884
215780_s_at				-1.06352	8.25779	0.00637039
221814_at	GPR124	G protein-coupled receptor 124	8p11.23	-1.00188	7.84102	0.00639558
221041_s_at	SLC17A5	solute carrier family 17 (anion/sugar transporter), member 5	6q14-q15	-0.654984	8.32675	0.00640209
204781_s_at	FAS	Fas (TNF receptor superfamily, member 6)	10q24.1	-0.604439	8.22187	0.00640209
41037_at	TEAD4	TEA domain family member 4	12p13.3-p13.2	-0.683256	7.54637	0.00641506
206765_at	KCNJ2	potassium inwardly-rectifying channel, subfamily J, member 2	17q24.3	-0.657686	7.77597	0.00648622
209942_x_at	MAGEA3	melanoma antigen family A, 3	Xq28	-2.24871	8.0294	0.00649395
206169_x_at	ZC3H7B	zinc finger CCCH-type containing 7B	22q13.2	-0.719765	10.0852	0.00652841
203042_at	LAMP2	lysosomal-associated membrane protein 2	Xq24	-0.658557	8.29555	0.00658808
212226_s_at	PPAP2B	phosphatidic acid phosphatase type 2B	1pter-p22.1	-0.831687	9.48018	0.00660378
209760_at	KIAA0922	KIAA0922	4q31.3	-0.652747	8.36637	0.00662477
205159_at	CSF2RB	colony stimulating factor 2 receptor, beta, low-affinity (granulocyte-macrophage)	22q13.1	-0.636784	7.94061	0.00664084
221016_s_at	TCF7L1	transcription factor 7-like 1 (T-cell specific, HMG-box)	2p11.2	-0.618627	8.47223	0.0066464
210018_x_at	MALT1	mucosa associated lymphoid tissue lymphoma translocation gene 1	18q21	-0.636877	7.97806	0.00669521
207914_x_at	EVX1	even-skipped homeobox 1	7p15.2	-0.647721	7.16459	0.00670465
217157_x_at				-1.12401	8.59043	0.00675766
208633_s_at	MACF1	microtubule-actin crosslinking factor 1	1p32-p31	-0.605299	8.86716	0.00691167
215382_x_at	TPSAB1	tryptase alpha/beta 1	16p13.3	-0.996616	7.73256	0.00709522
219306_at	KIF15	kinesin family member 15	3p21.31	-0.74348	7.48274	0.00709522
213541_s_at	ERG	v-ets erythroblastosis virus E26 oncogene homolog (avian)	21q22.3	-0.617118	7.34655	0.00709606
202668_at	EFNB2	ephrin-B2	13q33	-0.740524	9.41862	0.00711791
213074_at	PHIP	pleckstrin homology domain interacting protein	6q14	-0.603603	10.1797	0.00712086
203865_s_at	ADARB1	adenosine deaminase, RNA-specific, B1	21q22.3	-1.10185	7.918	0.00720439
215560_x_at	MTRF1L	mitochondrial translational release factor 1-like	6q25-q26	-0.621533	7.77984	0.00720748
[truncated: 83 more rows]

## Sheet: SanchezC Invasive Down
ID	Symbol	Gene Title	Chromosome	logFC	AveExpr	adj.P.Val
[truncated: 1,241 more rows]

## Sheet: Kim MS1 Up
ID	Symbol	Gene Title	Chromosome	logFC	AveExpr	adj.P.Val
[truncated: 957 more rows]

[truncated: 11 more sheets: Kim MS2 Up, DyrskjotNatGen MS1 Up, DyrskjotNatGen MS2 Up, StranskyNatGen MS1 Up, StranskyNatGen MS2 Up, SanchezC MS1 Up, SanchezC MS2 Up, StranskyNatGen Grade High Up, StranskyNatGen Grade Low Up, SanchezC Grade High Up, SanchezC Grade Low Up]
