# Supplementary material for: Combination of a Novel Gene Expression Signature with a Clinical Nomogram Improves the Prediction of Survival in High-Risk Bladder Cancer
Source: Oxford University Press journal article supplement (doi:10.1158/1078-0432.ccr-11-2271), 2012-01-06
Supplement: 10780432ccr112271-sup-t5_xls_553k.xls [file 10780432ccr112271-sup-t5_xls_553k.xls]

## Sheet: Overlap Invasive-NonMuscleInvas
This file lists all significantly differentially expressed probe sets which are also found to be differentially expressed in other data sets.
Genes marked with an asterisk are known cancer genes according the Sanger Cancer Census.
Affymetrix	Symbol	Description	Study	List	Rank	AveFC
204456_s_at	GAS1	growth arrest-specific 1	BlaveriCCR	InvUP	5	-4.7
			DyrskjotNatGen	InvUP
			Kim Molecular Cancer 2010	InvUP
			SanchezCarbayoJCO	InvUP
			StranskyNatGen	InvUP
202831_at	GPX2	glutathione peroxidase 2 (gastrointestinal)	BlaveriCCR	SupUP	17, 280	3.02
			DyrskjotNatGen	SupUP
			Kim Molecular Cancer 2010	SupUp
			SanchezCarbayoJCO	SupUP
			StranskyNatGen	SupUP
202237_at	NNMT	nicotinamide N-methyltransferase	BlaveriCCR	InvUP	68, 145	-2.63
			DyrskjotNatGen	InvUP
			Kim Molecular Cancer 2010	InvUP
			SanchezCarbayoJCO	InvUP
			StranskyNatGen	InvUP
201438_at	COL6A3	collagen, type VI, alpha 3	BlaveriCCR	InvUP	317	-1.7
			DyrskjotNatGen	InvUP
			Kim Molecular Cancer 2010	InvUP
			SanchezCarbayoJCO	InvUP
			StranskyNatGen	InvUP
205856_at	SLC14A1	solute carrier family 14 (urea transporter), member 1 (Kidd blood group)	BlaveriCCR	SupUP	1, 11	4.68
			DyrskjotNatGen	SupUP
			Kim Molecular Cancer 2010	SupUp
			SanchezCarbayoJCO	SupUP
204818_at	HSD17B2	hydroxysteroid (17-beta) dehydrogenase 2	DyrskjotNatGen	SupUP	6	4.7
			Kim Molecular Cancer 2010	SupUp
			SanchezCarbayoJCO	SupUP
			StranskyNatGen	SupUP
1555497_a_at	CYP4B1	cytochrome P450, family 4, subfamily B, polypeptide 1	BlaveriCCR	SupUP	13, 14	4.32
			DyrskjotNatGen	SupUP
			Kim Molecular Cancer 2010	SupUp
			SanchezCarbayoJCO	SupUP
212344_at	SULF1	sulfatase 1	BlaveriCCR	InvUP	19, 39, 82	-3.41
			Kim Molecular Cancer 2010	InvUP
			SanchezCarbayoJCO	InvUP
			StranskyNatGen	InvUP
204607_at	HMGCS2	3-hydroxy-3-methylglutaryl-CoA synthase 2 (mitochondrial)	DyrskjotNatGen	SupUP	25	3.8
			Kim Molecular Cancer 2010	SupUp
			SanchezCarbayoJCO	SupUP
			StranskyNatGen	SupUP
201852_x_at	COL3A1	collagen, type III, alpha 1	BlaveriCCR	InvUP	32, 256, 342, 375	-2.16
			Kim Molecular Cancer 2010	InvUP
			SanchezCarbayoJCO	InvUP
			StranskyNatGen	InvUP
201792_at	AEBP1	AE binding protein 1	BlaveriCCR	InvUP	58	-3.05
			Kim Molecular Cancer 2010	InvUP
			SanchezCarbayoJCO	InvUP
			StranskyNatGen	InvUP
209696_at	FBP1	fructose-1,6-bisphosphatase 1	BlaveriCCR	SupUP	60	3.04
			Kim Molecular Cancer 2010	SupUp
			SanchezCarbayoJCO	SupUP
			StranskyNatGen	SupUP
205073_at	CYP2J2	cytochrome P450, family 2, subfamily J, polypeptide 2	BlaveriCCR	SupUP	79	2.84
			DyrskjotNatGen	SupUP
			Kim Molecular Cancer 2010	SupUp
			StranskyNatGen	SupUP
201645_at	TNC	tenascin C	BlaveriCCR	InvUP	87	-2.77
			Kim Molecular Cancer 2010	InvUP
			SanchezCarbayoJCO	InvUP
			StranskyNatGen	InvUP
204667_at	FOXA1	forkhead box A1	DyrskjotNatGen	SupUP	90	2.75
			Kim Molecular Cancer 2010	SupUp
			SanchezCarbayoJCO	SupUP
			StranskyNatGen	SupUP
207431_s_at	DEGS1	degenerative spermatocyte homolog 1, lipid desaturase (Drosophila)	BlaveriCCR	InvUP	93, 310	-2.22
			Kim Molecular Cancer 2010	InvUP
			SanchezCarbayoJCO	InvUP
			StranskyNatGen	InvUP
212841_s_at	PPFIBP2	PTPRF interacting protein, binding protein 2 (liprin beta 2)	BlaveriCCR	SupUP	103	2.65
			Kim Molecular Cancer 2010	SupUp
			SanchezCarbayoJCO	SupUP
			StranskyNatGen	SupUP
1553970_s_at	FAP	carboxyl ester lipase (bile salt-stimulated lipase)	BlaveriCCR	InvUP	115	-2.53
			Kim Molecular Cancer 2010	InvUP
			SanchezCarbayoJCO	InvUP
			StranskyNatGen	InvUP
1558199_at	FN1	fibronectin 1	BlaveriCCR	InvUP	124, 158, 187, 218, 265	-2.16
			DyrskjotNatGen	InvUP
			SanchezCarbayoJCO	InvUP
			StranskyNatGen	InvUP
201283_s_at	TRAK1	trafficking protein, kinesin binding 1	DyrskjotNatGen	SupUP	169, 191, 217, 378	2
			Kim Molecular Cancer 2010	SupUp
			SanchezCarbayoJCO	SupUP
			StranskyNatGen	SupUP
201853_s_at	CDC25B	cell division cycle 25 homolog B (S. pombe)	BlaveriCCR	InvUP	177	-2.21
			DyrskjotNatGen	InvUP
			Kim Molecular Cancer 2010	InvUP
			StranskyNatGen	InvUP
201506_at	TGFBI	transforming growth factor, beta-induced, 68kDa	DyrskjotNatGen	InvUP	210	-2.07
			Kim Molecular Cancer 2010	InvUP
			SanchezCarbayoJCO	InvUP
			StranskyNatGen	InvUP
203509_at	SORL1	sortilin-related receptor, L(DLR class) A repeats-containing	DyrskjotNatGen	SupUP	213	2.06
			Kim Molecular Cancer 2010	SupUp
			SanchezCarbayoJCO	SupUP
			StranskyNatGen	SupUP
201615_x_at	CALD1	caldesmon 1	BlaveriCCR	InvUP	272, 371	-1.68
			Kim Molecular Cancer 2010	InvUP
			SanchezCarbayoJCO	InvUP
			StranskyNatGen	InvUP
208636_at	ACTN1	actinin, alpha 1	DyrskjotNatGen	InvUP	312, 433	-1.55
			Kim Molecular Cancer 2010	InvUP
			SanchezCarbayoJCO	InvUP
			StranskyNatGen	InvUP
207069_s_at	SMAD6	SMAD family member 6	DyrskjotNatGen	SupUP	319	1.69
			Kim Molecular Cancer 2010	SupUp
			SanchezCarbayoJCO	SupUP
			StranskyNatGen	SupUP
204345_at	COL16A1	collagen, type XVI, alpha 1	DyrskjotNatGen	InvUP	343	-1.63
			Kim Molecular Cancer 2010	InvUP
			SanchezCarbayoJCO	InvUP
			StranskyNatGen	InvUP
1555777_at	POSTN	periostin, osteoblast specific factor	DyrskjotNatGen	InvUP	2, 3	-4.84
			SanchezCarbayoJCO	InvUP
			StranskyNatGen	InvUP
204378_at	BCAS1	breast carcinoma amplified sequence 1	Kim Molecular Cancer 2010	SupUp	30, 43	3.51
			SanchezCarbayoJCO	SupUP
			StranskyNatGen	SupUP
209621_s_at	PDLIM3	PDZ and LIM domain 3	Kim Molecular Cancer 2010	InvUP	63	-3.01
			SanchezCarbayoJCO	InvUP
			StranskyNatGen	InvUP
203083_at	THBS2	thrombospondin 2	BlaveriCCR	InvUP	75	-2.89
			Kim Molecular Cancer 2010	InvUP
			StranskyNatGen	InvUP
203217_s_at	ST3GAL5	ST3 beta-galactoside alpha-2,3-sialyltransferase 5	Kim Molecular Cancer 2010	SupUp	110	2.55
			SanchezCarbayoJCO	SupUP
			StranskyNatGen	SupUP
214390_s_at	BCAT1	branched chain amino-acid transaminase 1, cytosolic	BlaveriCCR	InvUP	127	-2.44
			Kim Molecular Cancer 2010	InvUP
			StranskyNatGen	InvUP
1555758_a_at	CDKN3	cyclin-dependent kinase inhibitor 3	DyrskjotNatGen	InvUP	133, 251	-2.15
			Kim Molecular Cancer 2010	InvUP
			StranskyNatGen	InvUP
221729_at	COL5A2	collagen, type V, alpha 2	Kim Molecular Cancer 2010	InvUP	139, 254	-2.12
			SanchezCarbayoJCO	InvUP
			StranskyNatGen	InvUP
208161_s_at	ABCC3	ATP-binding cassette, sub-family C (CFTR/MRP), member 3	Kim Molecular Cancer 2010	SupUp	141, 352, 386	1.82
			SanchezCarbayoJCO	SupUP
			StranskyNatGen	SupUP
203167_at	TIMP2	TIMP metallopeptidase inhibitor 2	DyrskjotNatGen	InvUP	151	-2.3
			Kim Molecular Cancer 2010	InvUP
			StranskyNatGen	InvUP
203759_at	ST3GAL4	ST3 beta-galactoside alpha-2,3-sialyltransferase 4	BlaveriCCR	SupUP	171	2.25
			Kim Molecular Cancer 2010	SupUp
			StranskyNatGen	SupUP
206539_s_at	CYP4F12	cytochrome P450, family 4, subfamily F, polypeptide 12	BlaveriCCR	SupUP	183	2.19
			Kim Molecular Cancer 2010	SupUp
			StranskyNatGen	SupUP
204326_x_at	MT1X	metallothionein 1X	Kim Molecular Cancer 2010	InvUP	184, 214	-2.12
			SanchezCarbayoJCO	InvUP
			StranskyNatGen	InvUP
1563466_at	MYLK	myosin light chain kinase	Kim Molecular Cancer 2010	InvUP	193, 227	-2.07
			SanchezCarbayoJCO	InvUP
			StranskyNatGen	InvUP
212067_s_at	C1R	complement component 1, r subcomponent	BlaveriCCR	InvUP	205	-2.09
			SanchezCarbayoJCO	InvUP
			StranskyNatGen	InvUP
1557535_at	PALLD	palladin, cytoskeletal associated protein	Kim Molecular Cancer 2010	InvUP	222, 284, 420	-1.75
			SanchezCarbayoJCO	InvUP
			StranskyNatGen	InvUP
200859_x_at	FLNA	filamin A, alpha	DyrskjotNatGen	InvUP	239, 260, 288	-1.87
			Kim Molecular Cancer 2010	InvUP
			StranskyNatGen	InvUP
202403_s_at	COL1A2	collagen, type I, alpha 2	Kim Molecular Cancer 2010	InvUP	289	-1.78
			SanchezCarbayoJCO	InvUP
			StranskyNatGen	InvUP
209590_at	BMP7	bone morphogenetic protein 7	DyrskjotNatGen	SupUP	301	1.74
			Kim Molecular Cancer 2010	SupUp
			StranskyNatGen	SupUP
203414_at	MMD	monocyte to macrophage differentiation-associated	Kim Molecular Cancer 2010	InvUP	330	-1.66
			SanchezCarbayoJCO	InvUP
			StranskyNatGen	InvUP
201744_s_at	LUM	lumican	BlaveriCCR	InvUP	331	-1.66
			Kim Molecular Cancer 2010	InvUP
			StranskyNatGen	InvUP
201105_at	LGALS1	lectin, galactoside-binding, soluble, 1	DyrskjotNatGen	InvUP	345	-1.62
			Kim Molecular Cancer 2010	InvUP
			StranskyNatGen	InvUP
200782_at	ANXA5	annexin A5	BlaveriCCR	InvUP	347	-1.62
			Kim Molecular Cancer 2010	InvUP
			StranskyNatGen	InvUP
200755_s_at	CALU	calumenin	BlaveriCCR	InvUP	449, 465	-1.33
			Kim Molecular Cancer 2010	InvUP
			StranskyNatGen	InvUP
204813_at	MAPK10	mitogen-activated protein kinase 10	BlaveriCCR	SupUP	490	1.25
			DyrskjotNatGen	SupUP
			StranskyNatGen	SupUP
204320_at	COL11A1	collagen, type XI, alpha 1	SanchezCarbayoJCO	InvUP	7, 31	-4.16
			StranskyNatGen	InvUP
214774_x_at	TOX3	TOX high mobility group box family member 3	SanchezCarbayoJCO	SupUP	8, 9, 16	4.47
			StranskyNatGen	SupUP
218468_s_at	GREM1	gremlin 1	Kim Molecular Cancer 2010	InvUP	10, 18	-4.32
			SanchezCarbayoJCO	InvUP
205765_at	CYP3A5	cytochrome P450, family 3, subfamily A, polypeptide 5	Kim Molecular Cancer 2010	SupUp	23, 29, 37	3.7
			StranskyNatGen	SupUP
210143_at	ANXA10	annexin A10	Kim Molecular Cancer 2010	SupUp	26	3.8
			StranskyNatGen	SupUP
204298_s_at	LOX	lysyl oxidase	SanchezCarbayoJCO	InvUP	34	-3.55
			StranskyNatGen	InvUP
205941_s_at	COL10A1	collagen, type X, alpha 1	SanchezCarbayoJCO	InvUP	41	-3.35
			StranskyNatGen	InvUP
205166_at	CAPN5	calpain 5	Kim Molecular Cancer 2010	SupUp	47	3.27
			StranskyNatGen	SupUP
1557918_s_at	SLC16A1	solute carrier family 16, member 1 (monocarboxylic acid transporter 1)	SanchezCarbayoJCO	InvUP	50, 88, 94	-2.89
			StranskyNatGen	InvUP
201430_s_at	DPYSL3	dihydropyrimidinase-like 3	Kim Molecular Cancer 2010	InvUP	51, 84	-3
			StranskyNatGen	InvUP
202274_at	ACTG2	actin, gamma 2, smooth muscle, enteric	Kim Molecular Cancer 2010	InvUP	57	-3.06
			StranskyNatGen	InvUP
202206_at	ARL4C	ADP-ribosylation factor-like 4C	BlaveriCCR	InvUP	80, 220, 435	-2.07
			StranskyNatGen	InvUP
202765_s_at	FBN1	fibrillin 1	SanchezCarbayoJCO	InvUP	81	-2.82
			StranskyNatGen	InvUP
206025_s_at	TNFAIP6	tumor necrosis factor, alpha-induced protein 6	Kim Molecular Cancer 2010	InvUP	85	-2.79
			SanchezCarbayoJCO	InvUP
225726_s_at	PLEKHH1	pleckstrin homology domain containing, family H (with MyTH4 domain) member 1	BlaveriCCR	SupUP	92, 224	2.36
			Kim Molecular Cancer 2010	SupUp
204926_at	INHBA	inhibin, beta A	BlaveriCCR	InvUP	95	-2.71
			SanchezCarbayoJCO	InvUP
212190_at	SERPINE2	serpin peptidase inhibitor, clade E (nexin, plasminogen activator inhibitor type 1), member 2	Kim Molecular Cancer 2010	InvUP	104	-2.63
			StranskyNatGen	InvUP
201893_x_at	DCN	decorin	Kim Molecular Cancer 2010	InvUP	106, 136, 209	-2.36
			SanchezCarbayoJCO	InvUP
204688_at	SGCE	sarcoglycan, epsilon	Kim Molecular Cancer 2010	InvUP	116	-2.53
			StranskyNatGen	InvUP
204962_s_at	CENPA	centromere protein A	Kim Molecular Cancer 2010	InvUP	123	-2.47
			StranskyNatGen	InvUP
208584_at	SNCG	synuclein, gamma (breast cancer-specific protein 1)	Kim Molecular Cancer 2010	SupUp	126	2.45
			StranskyNatGen	SupUP
221676_s_at	CORO1C	coronin, actin binding protein, 1C	Kim Molecular Cancer 2010	InvUP	152, 478	-1.79
			SanchezCarbayoJCO	InvUP
202768_at	FOSB	FBJ murine osteosarcoma viral oncogene homolog B	DyrskjotNatGen	InvUP	153	2.3
			Kim Molecular Cancer 2010	InvUP
213629_x_at	MT1F	metallothionein 1F	BlaveriCCR	InvUP	163	-2.27
			StranskyNatGen	InvUP
205459_s_at	NPAS2	neuronal PAS domain protein 2	SanchezCarbayoJCO	SupUP	164, 245, 349	1.93
			StranskyNatGen	SupUP
204083_s_at	TPM2	tropomyosin 2 (beta)	Kim Molecular Cancer 2010	InvUP	178	-2.21
			StranskyNatGen	InvUP
204794_at	DUSP2	dual specificity phosphatase 2	Kim Molecular Cancer 2010	SupUp	194	2.14
			StranskyNatGen	SupUP
213422_s_at	MXRA8	matrix-remodelling associated 8	SanchezCarbayoJCO	InvUP	203	-2.1
			StranskyNatGen	InvUP
221081_s_at	DENND2D	DENN/MADD domain containing 2D	Kim Molecular Cancer 2010	SupUp	212	2.06
			SanchezCarbayoJCO	SupUP
204017_at	KDELR3	KDEL (Lys-Asp-Glu-Leu) endoplasmic reticulum protein retention receptor 3	Kim Molecular Cancer 2010	InvUP	216	-2.05
			StranskyNatGen	InvUP
204140_at	TPST1	tyrosylprotein sulfotransferase 1	Kim Molecular Cancer 2010	InvUP	223	-2.01
			StranskyNatGen	InvUP
201445_at	CNN3	calponin 3, acidic	Kim Molecular Cancer 2010	InvUP	231, 561	-1.51
			StranskyNatGen	InvUP
1558532_at	TPM1	tropomyosin 1 (alpha)	Kim Molecular Cancer 2010	InvUP	241	-1.94
			StranskyNatGen	InvUP
1557938_s_at	PTRF	polymerase I and transcript release factor	Kim Molecular Cancer 2010	InvUP	253, 382	-1.7
			StranskyNatGen	InvUP
208414_s_at	HOXB3	homeobox B3	Kim Molecular Cancer 2010	SupUp	268	1.84
			StranskyNatGen	SupUP
205396_at	SMAD3	SMAD family member 3	DyrskjotNatGen	SupUP	274, 418	1.63
			StranskyNatGen	SupUP
204527_at	MYO5A	myosin VA (heavy chain 12, myoxin)	Kim Molecular Cancer 2010	InvUP	277	-1.81
			StranskyNatGen	InvUP
201467_s_at	NQO1	NAD(P)H dehydrogenase, quinone 1	DyrskjotNatGen	SupUP	279	1.8
			StranskyNatGen	SupUP
201559_s_at	CLIC4	chloride intracellular channel 4	Kim Molecular Cancer 2010	InvUP	282	-1.8
			StranskyNatGen	InvUP
204092_s_at	AURKA	aurora kinase A	Kim Molecular Cancer 2010	InvUP	308	-1.73
			StranskyNatGen	InvUP
208434_at	MECOM	MDS1 and EVI1 complex locus	BlaveriCCR	SupUP	346	1.62
			StranskyNatGen	SupUP
202341_s_at	TRIM2	tripartite motif-containing 2	Kim Molecular Cancer 2010	SupUp	355, 446	1.47
			StranskyNatGen	SupUP
210052_s_at	TPX2	TPX2, microtubule-associated, homolog (Xenopus laevis)	Kim Molecular Cancer 2010	InvUP	358	-1.58
			StranskyNatGen	InvUP
203367_at	DUSP14	dual specificity phosphatase 14	Kim Molecular Cancer 2010	InvUP	394	-1.49
			StranskyNatGen	InvUP
207331_at	CENPF	centromere protein F, 350/400kDa (mitosin)	Kim Molecular Cancer 2010	InvUP	407	-1.46
			StranskyNatGen	InvUP
206831_s_at	ARSD	arylsulfatase D	Kim Molecular Cancer 2010	SupUp	422	1.42
			StranskyNatGen	SupUP
203385_at	DGKA	diacylglycerol kinase, alpha 80kDa	DyrskjotNatGen	SupUP	437	1.38
			StranskyNatGen	SupUP
204825_at	MELK	maternal embryonic leucine zipper kinase	Kim Molecular Cancer 2010	InvUP	445	-1.36
			StranskyNatGen	InvUP
203755_at	BUB1B*	budding uninhibited by benzimidazoles 1 homolog beta (yeast)	Kim Molecular Cancer 2010	InvUP	464	-1.3
			StranskyNatGen	InvUP
201732_s_at	CLCN3	chloride channel 3	DyrskjotNatGen	SupUP	467, 514, 556	1.18
			SanchezCarbayoJCO	SupUP
202679_at	NPC1	Niemann-Pick disease, type C1	SanchezCarbayoJCO	InvUP	476	-1.29
			StranskyNatGen	InvUP
1554692_at	SLC23A2	solute carrier family 23 (nucleobase transporters), member 2	DyrskjotNatGen	SupUP	485	1.26
			StranskyNatGen	SupUP
204792_s_at	IFT140	intraflagellar transport 140 homolog (Chlamydomonas)	Kim Molecular Cancer 2010	SupUp	496	1.22
			SanchezCarbayoJCO	SupUP
205074_at	SLC22A5	solute carrier family 22 (organic cation/carnitine transporter), member 5	Kim Molecular Cancer 2010	SupUp	518	1.16
			StranskyNatGen	SupUP
201020_at	YWHAH	tyrosine 3-monooxygenase/tryptophan 5-monooxygenase activation protein, eta polypeptide	Kim Molecular Cancer 2010	InvUP	545	-1.08
			StranskyNatGen	InvUP
204231_s_at	FAAH	fatty acid amide hydrolase	Kim Molecular Cancer 2010	SupUp	617	0.798
			StranskyNatGen	SupUP
223121_s_at	SFRP2	secreted frizzled-related protein 2	Kim Molecular Cancer 2010	InvUP	4	-4.71
1552566_at	BTBD16	BTB (POZ) domain containing 16	Kim Molecular Cancer 2010	SupUp	12	4.38
201842_s_at	EFEMP1	EGF-containing fibulin-like extracellular matrix protein 1	BlaveriCCR	InvUP	20	-3.98
209395_at	CHI3L1	chitinase 3-like 1 (cartilage glycoprotein-39)	StranskyNatGen	InvUP	21, 73	-3.43
205991_s_at	PRRX1	paired related homeobox 1	Kim Molecular Cancer 2010	InvUP	22	-3.95
225681_at	CTHRC1	collagen triple helix repeat containing 1	Kim Molecular Cancer 2010	InvUP	28	-3.77
236225_at	GGT6	gamma-glutamyltransferase 6	Kim Molecular Cancer 2010	SupUp	44	3.3
1555997_s_at	IGFBP5	insulin-like growth factor binding protein 5	BlaveriCCR	InvUP	46	-3.28
228232_s_at	VSIG2	V-set and immunoglobulin domain containing 2	Kim Molecular Cancer 2010	SupUp	48, 70	3.09
226226_at	TMEM45B	transmembrane protein 45B	Kim Molecular Cancer 2010	SupUp	56	3.07
226051_at	SELM	selenoprotein M	Kim Molecular Cancer 2010	InvUP	64	-3.01
201510_at	ELF3	E74-like factor 3 (ets domain transcription factor, epithelial-specific )	StranskyNatGen	SupUP	69, 98	2.81
204750_s_at	DSC2	desmocollin 2	Kim Molecular Cancer 2010	InvUP	76, 105, 118	-2.68
218309_at	CAMK2N1	calcium/calmodulin-dependent protein kinase II inhibitor 1	BlaveriCCR	SupUP	78	2.87
209406_at	BAG2	BCL2-associated athanogene 2	StranskyNatGen	InvUP	83	-2.81
1554126_at	MSRB3	methionine sulfoxide reductase B3	Kim Molecular Cancer 2010	InvUP	86, 176	-2.5
204955_at	SRPX	sushi-repeat-containing protein, X-linked	Kim Molecular Cancer 2010	InvUP	96	-2.71
1568603_at	CAPS	Ca++-dependent secretion activator	Kim Molecular Cancer 2010	SupUp	99, 160, 188, 559	2.04
205700_at	HSD17B6	hydroxysteroid (17-beta) dehydrogenase 6 homolog (mouse)	Kim Molecular Cancer 2010	InvUP	108	-2.6
213262_at	SACS	spastic ataxia of Charlevoix-Saguenay (sacsin)	StranskyNatGen	InvUP	113	-2.54
227676_at	FAM3D	family with sequence similarity 3, member D	Kim Molecular Cancer 2010	SupUp	120	2.51
219682_s_at	TBX3	T-box 3	Kim Molecular Cancer 2010	SupUp	121	2.5
226403_at	TMC4	transmembrane channel-like 4	Kim Molecular Cancer 2010	SupUp	125	2.46
218559_s_at	MAFB*	v-maf musculoaponeurotic fibrosarcoma oncogene homolog B (avian)	Kim Molecular Cancer 2010	InvUP	128	-2.43
201920_at	SLC20A1	solute carrier family 20 (phosphate transporter), member 1	BlaveriCCR	SupUP	131, 524	1.78
218657_at	RAPGEFL1	Rap guanine nucleotide exchange factor (GEF)-like 1	Kim Molecular Cancer 2010	SupUp	132	2.41
223748_at	SLC4A11	solute carrier family 4, sodium borate transporter, member 11	Kim Molecular Cancer 2010	SupUp	143	2.33
204072_s_at	FRY	furry homolog (Drosophila)	StranskyNatGen	SupUP	149	2.3
1554827_a_at	ADCY7	adenylate cyclase 7	StranskyNatGen	InvUP	161	-2.28
226743_at	SLFN11	schlafen family member 11	Kim Molecular Cancer 2010	InvUP	170	-2.25
217889_s_at	CYBRD1	cytochrome b reductase 1	Kim Molecular Cancer 2010	InvUP	173	-2.25
1558867_at	DSE	dermatan sulfate epimerase	SanchezCarbayoJCO	InvUP	182	-2.2
221880_s_at	FAM174B	family with sequence similarity 174, member B	SanchezCarbayoJCO	SupUP	185, 199	2.15
205613_at	SYT17	synaptotagmin XVII	Kim Molecular Cancer 2010	SupUp	189, 396	1.82
219102_at	RCN3	reticulocalbin 3, EF-hand calcium binding domain	Kim Molecular Cancer 2010	InvUP	190	-2.15
1555203_s_at	SLC44A4	solute carrier family 44, member 4	Kim Molecular Cancer 2010	SupUp	192	2.15
220319_s_at	MYLIP	myosin regulatory light chain interacting protein	SanchezCarbayoJCO	SupUP	195, 535	1.62
1554652_s_at	MAST4	microtubule associated serine/threonine kinase family member 4	StranskyNatGen	SupUP	207	2.09
225651_at	UBE2E2	ubiquitin-conjugating enzyme E2E 2 (UBC4/5 homolog, yeast)	Kim Molecular Cancer 2010	InvUP	208	-2.08
204519_s_at	PLLP	plasmolipin	BlaveriCCR	SupUP	215	2.05
226722_at	FAM20C	family with sequence similarity 20, member C	Kim Molecular Cancer 2010	InvUP	219	-2.03
209191_at	TUBB6	tubulin, beta 6	Kim Molecular Cancer 2010	InvUP	225	-2.01
1555259_at	ZAK	sterile alpha motif and leucine zipper containing kinase AZK	Kim Molecular Cancer 2010	InvUP	226, 309, 364	-1.76
1555433_at	SLC39A14	solute carrier family 39 (zinc transporter), member 14	StranskyNatGen	InvUP	229	-1.98
218574_s_at	LMCD1	LIM and cysteine-rich domains 1	Kim Molecular Cancer 2010	InvUP	233	-1.98
204141_at	TUBB2A	tubulin, beta 2A	StranskyNatGen	InvUP	235	-1.97
219918_s_at	ASPM	asp (abnormal spindle) homolog, microcephaly associated (Drosophila)	Kim Molecular Cancer 2010	InvUP	236	-1.97
204484_at	PIK3C2B	phosphoinositide-3-kinase, class 2, beta polypeptide	StranskyNatGen	SupUP	243	1.93
219257_s_at	SPHK1	sphingosine kinase 1	SanchezCarbayoJCO	InvUP	250	-1.9
1552619_a_at	ANLN	anillin, actin binding protein	Kim Molecular Cancer 2010	InvUP	257	-1.88
1562415_a_at	SPOCD1	SPOC domain containing 1	Kim Molecular Cancer 2010	SupUp	266	1.84
203764_at	DLGAP5	discs, large (Drosophila) homolog-associated protein 5	StranskyNatGen	InvUP	275	-1.81
218404_at	SNX10	sorting nexin 10	Kim Molecular Cancer 2010	InvUP	287	-1.79
215892_at	ZNF440	zinc finger protein 440	Kim Molecular Cancer 2010	SupUp	291, 314	1.74
208103_s_at	ANP32E	acidic (leucine-rich) nuclear phosphoprotein 32 family, member E	StranskyNatGen	InvUP	292	-1.78
220682_s_at	KLHL5	kelch-like 5 (Drosophila)	Kim Molecular Cancer 2010	InvUP	296	-1.77
209209_s_at	FERMT2	fermitin family member 2	StranskyNatGen	InvUP	299	-1.76
211071_s_at	MLLT11	myeloid/lymphoid or mixed-lineage leukemia (trithorax homolog, Drosophila); translocated to, 11	Kim Molecular Cancer 2010	InvUP	305	-1.73
225687_at	FAM83D	family with sequence similarity 83, member D	Kim Molecular Cancer 2010	InvUP	307	-1.73
204663_at	ME3	malic enzyme 3, NADP(+)-dependent, mitochondrial	StranskyNatGen	SupUP	354	1.58
203615_x_at	SULT1A1	sulfotransferase family, cytosolic, 1A, phenol-preferring, member 1	StranskyNatGen	SupUP	370, 533	1.33
241233_x_at	C21orf81	ankyrin repeat domain 20 family, member A3 pseudogene	Kim Molecular Cancer 2010	SupUp	376	1.53
1558338_at	SEMA6A	sema domain, transmembrane domain (TM), and cytoplasmic domain, (semaphorin) 6A	Kim Molecular Cancer 2010	SupUp	377	1.53
219561_at	COPZ2	coatomer protein complex, subunit zeta 2	SanchezCarbayoJCO	InvUP	380	-1.51
206599_at	SLC16A5	solute carrier family 16, member 5 (monocarboxylic acid transporter 6)	StranskyNatGen	SupUP	388, 406	1.48
206364_at	KIF14	kinesin family member 14	StranskyNatGen	InvUP	393	-1.49
205437_at	ZNF211	zinc finger protein 211	StranskyNatGen	SupUP	403	1.46
224927_at	KIAA1949	KIAA1949	Kim Molecular Cancer 2010	InvUP	404	-1.46
215668_s_at	PLXNB1	plexin B1	StranskyNatGen	SupUP	408	1.46
1559022_at	KIAA0494	KIAA0494	StranskyNatGen	SupUP	414	1.44
206550_s_at	NUP155	nucleoporin 155kDa	StranskyNatGen	InvUP	419	-1.44
221530_s_at	BHLHE41	basic helix-loop-helix family, member e41	SanchezCarbayoJCO	SupUP	424	1.42
209118_s_at	TUBA1A	tubulin, alpha 1a	Kim Molecular Cancer 2010	InvUP	439	-1.38
223234_at	MAD2L2	MAD2 mitotic arrest deficient-like 2 (yeast)	Kim Molecular Cancer 2010	InvUP	450	-1.35
208447_s_at	PRPS1	phosphoribosyl pyrophosphate synthetase 1	StranskyNatGen	InvUP	454	-1.33
218224_at	PNMA1	paraneoplastic antigen MA1	Kim Molecular Cancer 2010	InvUP	457	-1.32
228450_at	PLEKHA7	pleckstrin homology domain containing, family A member 7	Kim Molecular Cancer 2010	SupUp	460	1.32
1562368_at	CARD11*	caspase recruitment domain family, member 11	Kim Molecular Cancer 2010	SupUp	473	1.3
209341_s_at	IKBKB	inhibitor of kappa light polypeptide gene enhancer in B-cells, kinase beta	StranskyNatGen	SupUP	481	1.28
225096_at	C17orf79	chromosome 17 open reading frame 79	Kim Molecular Cancer 2010	InvUP	491	-1.24
218928_s_at	SLC37A1	solute carrier family 37 (glycerol-3-phosphate transporter), member 1	SanchezCarbayoJCO	SupUP	499	1.21
203567_s_at	TRIM38	tripartite motif-containing 38	StranskyNatGen	SupUP	505, 508, 553	1.15
208381_s_at	SGPL1	sphingosine-1-phosphate lyase 1	BlaveriCCR	SupUP	507	1.2
203117_s_at	PAN2	PAN2 poly(A) specific ribonuclease subunit homolog (S. cerevisiae)	StranskyNatGen	SupUP	511	1.19
224753_at	CDCA5	cell division cycle associated 5	Kim Molecular Cancer 2010	InvUP	519	-1.16
1560033_at	MCCC2	methylcrotonoyl-CoA carboxylase 2 (beta)	StranskyNatGen	SupUP	523	1.15
212020_s_at	MKI67	antigen identified by monoclonal antibody Ki-67	StranskyNatGen	InvUP	531	-1.11
1555895_at	DNM2	dynamin 2	StranskyNatGen	SupUP	547	1.07
200752_s_at	CAPN1	calpain 1, (mu/I) large subunit	StranskyNatGen	SupUP	554	1.05
200827_at	PLOD1	procollagen-lysine 1, 2-oxoglutarate 5-dioxygenase 1	StranskyNatGen	InvUP	560	-1.04
207719_x_at	CEP170	centrosomal protein 170kDa	StranskyNatGen	InvUP	563	-1.03
205345_at	BARD1	BRCA1 associated RING domain 1	StranskyNatGen	InvUP	568	-1.02
203286_at	RNF44	ring finger protein 44	StranskyNatGen	SupUP	588	0.961
201861_s_at	LRRFIP1	leucine rich repeat (in FLII) interacting protein 1	StranskyNatGen	SupUP	589	0.956
1552332_at	TRIOBP	TRIO and F-actin binding protein	StranskyNatGen	SupUP	593	0.93
214372_x_at	ERN2	endoplasmic reticulum to nucleus signaling 2	Kim Molecular Cancer 2010	SupUp	622	0.735
218473_s_at	GLT25D1	glycosyltransferase 25 domain containing 1	Kim Molecular Cancer 2010	InvUP	624	-0.73

## Sheet: Overlap MS1-MS2
Affymetrix	Symbol	Description	Study	List	Rank	AveFC
206463_s_at	DHRS2	dehydrogenase/reductase (SDR family) member 2	DyrskjotNatGen	MS1_UP	34, 38	-4.03
			Kim Molecular Cancer 2010	MS1_UP
			Lindgren Cancer Research 2010	MS1_UP
			SanchezCarbayoJCO	MS1_UP
			StranskyNatGen	MS1_UP
204379_s_at	FGFR3*	fibroblast growth factor receptor 3	DyrskjotNatGen	MS1_UP	124, 3340	-2.25
			Kim Molecular Cancer 2010	MS1_UP
			Lindgren Cancer Research 2010	MS1_UP
			SanchezCarbayoJCO	MS1_UP
			StranskyNatGen	MS1_UP
204351_at	S100P	S100 calcium binding protein P	DyrskjotNatGen	MS1_UP	220	-3.01
			Kim Molecular Cancer 2010	MS1_UP
			Lindgren Cancer Research 2010	MS1_UP
			SanchezCarbayoJCO	MS1_UP
			StranskyNatGen	MS1_UP
208894_at	HLA-DRA	major histocompatibility complex, class II, DR alpha	DyrskjotNatGen	MS2_UP	312, 324	2.77
			Kim Molecular Cancer 2010	MS2_UP
			Lindgren Cancer Research 2010	MS2_UP
			SanchezCarbayoJCO	MS2_UP
			StranskyNatGen	MS2_UP
1553114_a_at	PTK6	PTK6 protein tyrosine kinase 6	DyrskjotNatGen	MS1_UP	517, 1922	-1.99
			Kim Molecular Cancer 2010	MS1_UP
			Lindgren Cancer Research 2010	MS1_UP
			SanchezCarbayoJCO	MS1_UP
			StranskyNatGen	MS1_UP
203167_at	TIMP2	TIMP metallopeptidase inhibitor 2	DyrskjotNatGen	MS2_UP	587, 1065, 1271	2.04
			Kim Molecular Cancer 2010	MS2_UP
			Lindgren Cancer Research 2010	MS2_UP
			SanchezCarbayoJCO	MS2_UP
			StranskyNatGen	MS2_UP
1568574_x_at	SPP1	secreted phosphoprotein 1	DyrskjotNatGen	MS2_UP	804, 1140	2.01
			Kim Molecular Cancer 2010	MS2_UP
			Lindgren Cancer Research 2010	MS2_UP
			SanchezCarbayoJCO	MS2_UP
			StranskyNatGen	MS2_UP
207172_s_at	CDH11*	cadherin 11, type 2, OB-cadherin (osteoblast)	DyrskjotNatGen	MS2_UP	911, 2592	1.69
			Kim Molecular Cancer 2010	MS2_UP
			Lindgren Cancer Research 2010	MS2_UP
			SanchezCarbayoJCO	MS2_UP
			StranskyNatGen	MS2_UP
203574_at	NFIL3	nuclear factor, interleukin 3 regulated	DyrskjotNatGen	MS2_UP	1222	1.85
			Kim Molecular Cancer 2010	MS2_UP
			Lindgren Cancer Research 2010	MS2_UP
			SanchezCarbayoJCO	MS2_UP
			StranskyNatGen	MS2_UP
201445_at	CNN3	calponin 3, acidic	DyrskjotNatGen	MS2_UP	1263, 6028	1.3
			Kim Molecular Cancer 2010	MS2_UP
			Lindgren Cancer Research 2010	MS2_UP
			SanchezCarbayoJCO	MS2_UP
			StranskyNatGen	MS2_UP
202087_s_at	CTSL1	cathepsin L1	DyrskjotNatGen	MS2_UP	1395	1.75
			Kim Molecular Cancer 2010	MS2_UP
			Lindgren Cancer Research 2010	MS2_UP
			SanchezCarbayoJCO	MS2_UP
			StranskyNatGen	MS2_UP
1554933_at	PSIP1	PC4 and SFRS1 interacting protein 1	DyrskjotNatGen	MS2_UP	1435, 2668, 6891	1.24
			Kim Molecular Cancer 2010	MS2_UP
			Lindgren Cancer Research 2010	MS2_UP
			SanchezCarbayoJCO	MS2_UP
			StranskyNatGen	MS2_UP
210139_s_at	PMP22	peripheral myelin protein 22	DyrskjotNatGen	MS2_UP	2211	1.45
			Kim Molecular Cancer 2010	MS2_UP
			Lindgren Cancer Research 2010	MS2_UP
			SanchezCarbayoJCO	MS2_UP
			StranskyNatGen	MS2_UP
202625_at	LYN	v-yes-1 Yamaguchi sarcoma viral related oncogene homolog	DyrskjotNatGen	MS2_UP	2802, 3357, 3611	1.2
			Kim Molecular Cancer 2010	MS2_UP
			Lindgren Cancer Research 2010	MS2_UP
			SanchezCarbayoJCO	MS2_UP
			StranskyNatGen	MS2_UP
209590_at	BMP7	bone morphogenetic protein 7	DyrskjotNatGen	MS1_UP	3108, 3352	-1.2
			Kim Molecular Cancer 2010	MS1_UP
			Lindgren Cancer Research 2010	MS1_UP
			SanchezCarbayoJCO	MS1_UP
			StranskyNatGen	MS1_UP
203287_at	LAD1	ladinin 1	DyrskjotNatGen	MS1_UP	3251	-1.19
			Kim Molecular Cancer 2010	MS1_UP
			Lindgren Cancer Research 2010	MS1_UP
			SanchezCarbayoJCO	MS1_UP
			StranskyNatGen	MS1_UP
203385_at	DGKA	diacylglycerol kinase, alpha 80kDa	DyrskjotNatGen	MS1_UP	3317, 6689	-0.934
			Kim Molecular Cancer 2010	MS1_UP
			Lindgren Cancer Research 2010	MS1_UP
			SanchezCarbayoJCO	MS1_UP
			StranskyNatGen	MS1_UP
209110_s_at	RGL2	ral guanine nucleotide dissociation stimulator-like 2	DyrskjotNatGen	MS1_UP	4073	-1.04
			Kim Molecular Cancer 2010	MS1_UP
			Lindgren Cancer Research 2010	MS1_UP
			SanchezCarbayoJCO	MS1_UP
			StranskyNatGen	MS1_UP
211320_s_at	PTPRU	protein tyrosine phosphatase, receptor type, U	DyrskjotNatGen	MS1_UP	4305	-1.01
			Kim Molecular Cancer 2010	MS1_UP
			Lindgren Cancer Research 2010	MS1_UP
			SanchezCarbayoJCO	MS1_UP
			StranskyNatGen	MS1_UP
208636_at	ACTN1	actinin, alpha 1	DyrskjotNatGen	MS2_UP	4348, 5147, 6866	0.848
			Kim Molecular Cancer 2010	MS2_UP
			Lindgren Cancer Research 2010	MS2_UP
			SanchezCarbayoJCO	MS2_UP
			StranskyNatGen	MS2_UP
1555895_at	DNM2	dynamin 2	DyrskjotNatGen	MS1_UP	5797	-0.794
			Kim Molecular Cancer 2010	MS1_UP
			Lindgren Cancer Research 2010	MS1_UP
			SanchezCarbayoJCO	MS1_UP
			StranskyNatGen	MS1_UP
203675_at	NUCB2	nucleobindin 2	DyrskjotNatGen	MS2_UP	5931, 6412	0.75
			Kim Molecular Cancer 2010	MS2_UP
			Lindgren Cancer Research 2010	MS2_UP
			SanchezCarbayoJCO	MS2_UP
			StranskyNatGen	MS2_UP
205993_s_at	TBX2	T-box 2	DyrskjotNatGen	MS1_UP	19, 21, 581	-3.59
			Kim Molecular Cancer 2010	MS1_UP
			SanchezCarbayoJCO	MS1_UP
			StranskyNatGen	MS1_UP
204533_at	CXCL10	chemokine (C-X-C motif) ligand 10	DyrskjotNatGen	MS2_UP	23	4.15
			Kim Molecular Cancer 2010	MS2_UP
			SanchezCarbayoJCO	MS2_UP
			StranskyNatGen	MS2_UP
1554899_s_at	FCER1G	Fc fragment of IgE, high affinity I, receptor for; gamma polypeptide	DyrskjotNatGen	MS2_UP	25, 98	3.78
			Kim Molecular Cancer 2010	MS2_UP
			SanchezCarbayoJCO	MS2_UP
			StranskyNatGen	MS2_UP
202953_at	C1QB	complement component 1, q subcomponent, B chain	DyrskjotNatGen	MS2_UP	32	4.07
			Kim Molecular Cancer 2010	MS2_UP
			SanchezCarbayoJCO	MS2_UP
			StranskyNatGen	MS2_UP
204174_at	ALOX5AP	arachidonate 5-lipoxygenase-activating protein	DyrskjotNatGen	MS2_UP	39	3.98
			Kim Molecular Cancer 2010	MS2_UP
			SanchezCarbayoJCO	MS2_UP
			StranskyNatGen	MS2_UP
201743_at	CD14	CD14 molecule	DyrskjotNatGen	MS2_UP	43	3.9
			Kim Molecular Cancer 2010	MS2_UP
			SanchezCarbayoJCO	MS2_UP
			StranskyNatGen	MS2_UP
204456_s_at	GAS1	growth arrest-specific 1	DyrskjotNatGen	MS2_UP	48	3.86
			Kim Molecular Cancer 2010	MS2_UP
			SanchezCarbayoJCO	MS2_UP
			StranskyNatGen	MS2_UP
202831_at	GPX2	glutathione peroxidase 2 (gastrointestinal)	DyrskjotNatGen	MS1_UP	50, 2393	-2.61
			Kim Molecular Cancer 2010	MS1_UP
			SanchezCarbayoJCO	MS1_UP
			StranskyNatGen	MS1_UP
209602_s_at	GATA3*	GATA binding protein 3	DyrskjotNatGen	MS1_UP	53, 86, 137	-3.52
			Lindgren Cancer Research 2010	MS1_UP
			SanchezCarbayoJCO	MS1_UP
			StranskyNatGen	MS1_UP
1555852_at	PSMB9	proteasome (prosome, macropain) subunit, beta type, 9 (large multifunctional peptidase 2)	DyrskjotNatGen	MS2_UP	60, 632	3.01
			Lindgren Cancer Research 2010	MS2_UP
			SanchezCarbayoJCO	MS2_UP
			StranskyNatGen	MS2_UP
1554676_at	SRGN	serglycin	DyrskjotNatGen	MS2_UP	68, 931	2.84
			Kim Molecular Cancer 2010	MS2_UP
			SanchezCarbayoJCO	MS2_UP
			StranskyNatGen	MS2_UP
205405_at	SEMA5A	sema domain, seven thrombospondin repeats (type 1 and type 1-like), transmembrane domain (TM) and short cytoplasmic domain, (semaphorin) 5A	DyrskjotNatGen	MS1_UP	85, 813, 3924	-2.23
			Kim Molecular Cancer 2010	MS2_UP
			SanchezCarbayoJCO	MS1_UP
			StranskyNatGen	MS1_UP
1555229_a_at	C1S	complement component 1, s subcomponent	DyrskjotNatGen	MS2_UP	116, 706	2.79
			Kim Molecular Cancer 2010	MS2_UP
			SanchezCarbayoJCO	MS2_UP
			StranskyNatGen	MS2_UP
209369_at	ANXA3	annexin A3	DyrskjotNatGen	MS2_UP	120	3.34
			Kim Molecular Cancer 2010	MS2_UP
			SanchezCarbayoJCO	MS2_UP
			StranskyNatGen	MS2_UP
209480_at	HLA-DQB1	major histocompatibility complex, class II, DQ beta 1	DyrskjotNatGen	MS2_UP	122, 277, 341, 459, 1242	2.66
			Kim Molecular Cancer 2010	MS2_UP
			SanchezCarbayoJCO	MS2_UP
			StranskyNatGen	MS2_UP
208510_s_at	PPARG*	peroxisome proliferator-activated receptor gamma	DyrskjotNatGen	MS1_UP	157	-3.2
			Lindgren Cancer Research 2010	MS1_UP
			SanchezCarbayoJCO	MS1_UP
			StranskyNatGen	MS1_UP
207431_s_at	DEGS1	degenerative spermatocyte homolog 1, lipid desaturase (Drosophila)	Kim Molecular Cancer 2010	MS2_UP	166, 1833	2.36
			Lindgren Cancer Research 2010	MS2_UP
			SanchezCarbayoJCO	MS2_UP
			StranskyNatGen	MS2_UP
1555745_a_at	LYZ	lysozyme	DyrskjotNatGen	MS2_UP	171, 728	2.68
			Kim Molecular Cancer 2010	MS2_UP
			Lindgren Cancer Research 2010	MS2_UP
			SanchezCarbayoJCO	MS2_UP
203065_s_at	CAV1	caveolin 1, caveolae protein, 22kDa	DyrskjotNatGen	MS2_UP	242, 768	2.56
			Kim Molecular Cancer 2010	MS2_UP
			SanchezCarbayoJCO	MS2_UP
			StranskyNatGen	MS2_UP
203381_s_at	APOE	apolipoprotein E	DyrskjotNatGen	MS2_UP	254, 441, 3542	2.21
			Kim Molecular Cancer 2010	MS2_UP
			SanchezCarbayoJCO	MS2_UP
			StranskyNatGen	MS2_UP
203729_at	EMP3	epithelial membrane protein 3	DyrskjotNatGen	MS2_UP	318	2.77
			Kim Molecular Cancer 2010	MS2_UP
			SanchezCarbayoJCO	MS2_UP
			StranskyNatGen	MS2_UP
202509_s_at	TNFAIP2	tumor necrosis factor, alpha-induced protein 2	DyrskjotNatGen	MS1_UP	322, 3266	-1.97
			Kim Molecular Cancer 2010	MS1_UP
			SanchezCarbayoJCO	MS1_UP, MS2_UP
			StranskyNatGen	MS1_UP
203509_at	SORL1	sortilin-related receptor, L(DLR class) A repeats-containing	DyrskjotNatGen	MS1_UP	326, 644, 673	-2.44
			Lindgren Cancer Research 2010	MS1_UP
			SanchezCarbayoJCO	MS1_UP
			StranskyNatGen	MS1_UP
1405_i_at	CCL5	chemokine (C-C motif) ligand 5	DyrskjotNatGen	MS2_UP	409, 418, 494	2.56
			Kim Molecular Cancer 2010	MS2_UP
			SanchezCarbayoJCO	MS2_UP
			StranskyNatGen	MS2_UP
204619_s_at	VCAN	versican	DyrskjotNatGen	MS2_UP	436, 541, 2307, 2745, 2803	1.8
			Kim Molecular Cancer 2010	MS2_UP
			SanchezCarbayoJCO	MS2_UP
			StranskyNatGen	MS2_UP
201506_at	TGFBI	transforming growth factor, beta-induced, 68kDa	DyrskjotNatGen	MS2_UP	450	2.55
			Kim Molecular Cancer 2010	MS2_UP
			SanchezCarbayoJCO	MS2_UP
			StranskyNatGen	MS2_UP
201853_s_at	CDC25B	cell division cycle 25 homolog B (S. pombe)	DyrskjotNatGen	MS2_UP	471	2.52
			Lindgren Cancer Research 2010	MS2_UP
			SanchezCarbayoJCO	MS2_UP
			StranskyNatGen	MS2_UP
202450_s_at	CTSK	cathepsin K	DyrskjotNatGen	MS2_UP	521	2.44
			Lindgren Cancer Research 2010	MS2_UP
			SanchezCarbayoJCO	MS2_UP
			StranskyNatGen	MS2_UP
202988_s_at	RGS1	regulator of G-protein signaling 1	DyrskjotNatGen	MS2_UP	522, 1205	2.15
			Kim Molecular Cancer 2010	MS2_UP
			SanchezCarbayoJCO	MS2_UP
			StranskyNatGen	MS2_UP
204431_at	TLE2	transducin-like enhancer of split 2 (E(sp1) homolog, Drosophila)	DyrskjotNatGen	MS1_UP	527, 3434	-1.8
			Lindgren Cancer Research 2010	MS1_UP
			SanchezCarbayoJCO	MS1_UP
			StranskyNatGen	MS1_UP
212185_x_at	MT2A	metallothionein 2A	DyrskjotNatGen	MS2_UP	531	2.42
			Kim Molecular Cancer 2010	MS2_UP
			SanchezCarbayoJCO	MS2_UP
			StranskyNatGen	MS2_UP
201422_at	IFI30	interferon, gamma-inducible protein 30	DyrskjotNatGen	MS2_UP	552	2.4
			Lindgren Cancer Research 2010	MS2_UP
			SanchezCarbayoJCO	MS2_UP
			StranskyNatGen	MS2_UP
205019_s_at	VIPR1	vasoactive intestinal peptide receptor 1	DyrskjotNatGen	MS1_UP	664	-2.27
			Kim Molecular Cancer 2010	MS1_UP
			SanchezCarbayoJCO	MS1_UP
			StranskyNatGen	MS1_UP
203423_at	RBP1	retinol binding protein 1, cellular	DyrskjotNatGen	MS2_UP	704	2.23
			Kim Molecular Cancer 2010	MS2_UP
			SanchezCarbayoJCO	MS2_UP
			StranskyNatGen	MS2_UP
216598_s_at	CCL2	chemokine (C-C motif) ligand 2	Kim Molecular Cancer 2010	MS2_UP	802	2.13
			Lindgren Cancer Research 2010	MS2_UP
			SanchezCarbayoJCO	MS2_UP
			StranskyNatGen	MS2_UP
209386_at	TM4SF1	transmembrane 4 L six family member 1	DyrskjotNatGen	MS2_UP	842, 855, 2436	1.86
			Lindgren Cancer Research 2010	MS2_UP
			SanchezCarbayoJCO	MS2_UP
			StranskyNatGen	MS2_UP
210845_s_at	PLAUR	plasminogen activator, urokinase receptor	DyrskjotNatGen	MS2_UP	860, 1011, 1973	1.87
			Lindgren Cancer Research 2010	MS2_UP
			SanchezCarbayoJCO	MS2_UP
			StranskyNatGen	MS2_UP
206832_s_at	SEMA3F	sema domain, immunoglobulin domain (Ig), short basic domain, secreted, (semaphorin) 3F	DyrskjotNatGen	MS1_UP	904, 1244	-1.94
			Kim Molecular Cancer 2010	MS1_UP
			SanchezCarbayoJCO	MS1_UP
			StranskyNatGen	MS1_UP
209201_x_at	CXCR4	chemokine (C-X-C motif) receptor 4	DyrskjotNatGen	MS2_UP	906, 1076, 2084	1.83
			Kim Molecular Cancer 2010	MS2_UP
			SanchezCarbayoJCO	MS2_UP
			StranskyNatGen	MS2_UP
202637_s_at	ICAM1	intercellular adhesion molecule 1	DyrskjotNatGen	MS2_UP	1013, 1505	1.84
			Lindgren Cancer Research 2010	MS2_UP
			SanchezCarbayoJCO	MS2_UP
			StranskyNatGen	MS2_UP
205208_at	ALDH1L1	aldehyde dehydrogenase 1 family, member L1	Kim Molecular Cancer 2010	MS1_UP	1022	-1.98
			Lindgren Cancer Research 2010	MS1_UP
			SanchezCarbayoJCO	MS1_UP
			StranskyNatGen	MS1_UP
201012_at	ANXA1	annexin A1	Kim Molecular Cancer 2010	MS2_UP	1025	1.97
			Lindgren Cancer Research 2010	MS2_UP
			SanchezCarbayoJCO	MS2_UP
			StranskyNatGen	MS2_UP
203217_s_at	ST3GAL5	ST3 beta-galactoside alpha-2,3-sialyltransferase 5	Kim Molecular Cancer 2010	MS1_UP	1070	-1.94
			Lindgren Cancer Research 2010	MS1_UP
			SanchezCarbayoJCO	MS1_UP
			StranskyNatGen	MS1_UP
1555433_at	SLC39A14	solute carrier family 39 (zinc transporter), member 14	DyrskjotNatGen	MS2_UP	1097	1.93
			Kim Molecular Cancer 2010	MS2_UP
			SanchezCarbayoJCO	MS2_UP
			StranskyNatGen	MS2_UP
208161_s_at	ABCC3	ATP-binding cassette, sub-family C (CFTR/MRP), member 3	Kim Molecular Cancer 2010	MS1_UP	1120, 2642, 3609	-1.46
			Lindgren Cancer Research 2010	MS1_UP
			SanchezCarbayoJCO	MS1_UP
			StranskyNatGen	MS1_UP
203932_at	HLA-DMB	major histocompatibility complex, class II, DM beta	DyrskjotNatGen	MS2_UP	1130	1.9
			Kim Molecular Cancer 2010	MS2_UP
			SanchezCarbayoJCO	MS2_UP
			StranskyNatGen	MS2_UP
215668_s_at	PLXNB1	plexin B1	Kim Molecular Cancer 2010	MS1_UP	1136	-1.9
			Lindgren Cancer Research 2010	MS1_UP
			SanchezCarbayoJCO	MS1_UP
			StranskyNatGen	MS1_UP
221729_at	COL5A2	collagen, type V, alpha 2	DyrskjotNatGen	MS2_UP	1152, 1940	1.71
			Lindgren Cancer Research 2010	MS2_UP
			SanchezCarbayoJCO	MS2_UP
			StranskyNatGen	MS2_UP
202859_x_at	IL8	interleukin 8	DyrskjotNatGen	MS2_UP	1250	1.84
			Lindgren Cancer Research 2010	MS2_UP
			SanchezCarbayoJCO	MS2_UP
			StranskyNatGen	MS2_UP
201852_x_at	COL3A1	collagen, type III, alpha 1	DyrskjotNatGen	MS2_UP	1287, 2188, 3008, 4931	1.35
			Kim Molecular Cancer 2010	MS2_UP
			SanchezCarbayoJCO	MS2_UP
			StranskyNatGen	MS2_UP
207069_s_at	SMAD6	SMAD family member 6	DyrskjotNatGen	MS1_UP	1300	-1.8
			Lindgren Cancer Research 2010	MS1_UP
			SanchezCarbayoJCO	MS1_UP
			StranskyNatGen	MS1_UP
1559370_at	DAB2	disabled homolog 2, mitogen-responsive phosphoprotein (Drosophila)	Kim Molecular Cancer 2010	MS2_UP	1305, 2322, 2429, 3333	1.44
			Lindgren Cancer Research 2010	MS2_UP
			SanchezCarbayoJCO	MS2_UP
			StranskyNatGen	MS2_UP
203759_at	ST3GAL4	ST3 beta-galactoside alpha-2,3-sialyltransferase 4	DyrskjotNatGen	MS1_UP	1370	-1.76
			Kim Molecular Cancer 2010	MS1_UP
			SanchezCarbayoJCO	MS1_UP
			StranskyNatGen	MS1_UP
1558199_at	FN1	fibronectin 1	DyrskjotNatGen	MS2_UP	1376, 1709, 1882, 2166, 2483, 2713	1.51
			Lindgren Cancer Research 2010	MS2_UP
			SanchezCarbayoJCO	MS2_UP
			StranskyNatGen	MS2_UP
200782_at	ANXA5	annexin A5	DyrskjotNatGen	MS2_UP	1423	1.74
			Kim Molecular Cancer 2010	MS2_UP
			SanchezCarbayoJCO	MS2_UP
			StranskyNatGen	MS2_UP
203414_at	MMD	monocyte to macrophage differentiation-associated	DyrskjotNatGen	MS2_UP	1424	1.74
			Kim Molecular Cancer 2010	MS2_UP
			SanchezCarbayoJCO	MS2_UP
			StranskyNatGen	MS2_UP
201105_at	LGALS1	lectin, galactoside-binding, soluble, 1	DyrskjotNatGen	MS2_UP	1576	1.67
			Kim Molecular Cancer 2010	MS2_UP
			SanchezCarbayoJCO	MS2_UP
			StranskyNatGen	MS2_UP
204017_at	KDELR3	KDEL (Lys-Asp-Glu-Leu) endoplasmic reticulum protein retention receptor 3	Kim Molecular Cancer 2010	MS2_UP	1584, 1989	1.59
			Lindgren Cancer Research 2010	MS2_UP
			SanchezCarbayoJCO	MS2_UP
			StranskyNatGen	MS2_UP
204470_at	CXCL1	chemokine (C-X-C motif) ligand 1 (melanoma growth stimulating activity, alpha)	DyrskjotNatGen	MS2_UP	1591	1.67
			Lindgren Cancer Research 2010	MS2_UP
			SanchezCarbayoJCO	MS2_UP
			StranskyNatGen	MS2_UP
1566123_at	FABP6	fatty acid binding protein 6, ileal	DyrskjotNatGen	MS1_UP	1610	-1.66
			Kim Molecular Cancer 2010	MS1_UP
			SanchezCarbayoJCO	MS1_UP
			StranskyNatGen	MS1_UP
217762_s_at	RAB31	RAB31, member RAS oncogene family	DyrskjotNatGen	MS2_UP	1682, 2214, 2368	1.49
			Kim Molecular Cancer 2010	MS2_UP
			SanchezCarbayoJCO	MS2_UP
			StranskyNatGen	MS2_UP
205100_at	GFPT2	glutamine-fructose-6-phosphate transaminase 2	Kim Molecular Cancer 2010	MS2_UP	1842	1.57
			Lindgren Cancer Research 2010	MS2_UP
			SanchezCarbayoJCO	MS2_UP
			StranskyNatGen	MS2_UP
203508_at	TNFRSF1B	tumor necrosis factor receptor superfamily, member 1B	DyrskjotNatGen	MS2_UP	1925	1.54
			Lindgren Cancer Research 2010	MS2_UP
			SanchezCarbayoJCO	MS2_UP
			StranskyNatGen	MS2_UP
1555938_x_at	VIM	vimentin	DyrskjotNatGen	MS2_UP	1930	1.54
			Kim Molecular Cancer 2010	MS2_UP
			SanchezCarbayoJCO	MS2_UP
			StranskyNatGen	MS2_UP
1558532_at	TPM1	tropomyosin 1 (alpha)	DyrskjotNatGen	MS2_UP	2112, 4226	1.25
			Kim Molecular Cancer 2010	MS2_UP
			SanchezCarbayoJCO	MS2_UP
			StranskyNatGen	MS2_UP
1554383_a_at	TRAM2	translocation associated membrane protein 2	DyrskjotNatGen	MS2_UP	2121, 4639	1.22
			Kim Molecular Cancer 2010	MS2_UP
			SanchezCarbayoJCO	MS2_UP
			StranskyNatGen	MS2_UP
201042_at	TGM2	transglutaminase 2 (C polypeptide, protein-glutamine-gamma-glutamyltransferase)	Kim Molecular Cancer 2010	MS2_UP	2126, 2292	1.45
			Lindgren Cancer Research 2010	MS2_UP
			SanchezCarbayoJCO	MS2_UP
			StranskyNatGen	MS2_UP
202468_s_at	CTNNAL1	catenin (cadherin-associated protein), alpha-like 1	Kim Molecular Cancer 2010	MS2_UP	2176	1.46
			Lindgren Cancer Research 2010	MS2_UP
			SanchezCarbayoJCO	MS2_UP
			StranskyNatGen	MS2_UP
202388_at	RGS2	regulator of G-protein signaling 2, 24kDa	DyrskjotNatGen	MS2_UP	2363	1.4
			Kim Molecular Cancer 2010	MS2_UP
			SanchezCarbayoJCO	MS2_UP
			StranskyNatGen	MS2_UP
209008_x_at	KRT8	keratin 8	DyrskjotNatGen	MS1_UP	2399	-1.39
			Kim Molecular Cancer 2010	MS1_UP
			SanchezCarbayoJCO	MS1_UP
			StranskyNatGen	MS1_UP
201286_at	SDC1	syndecan 1	DyrskjotNatGen	MS1_UP	2435	-1.38
			Kim Molecular Cancer 2010	MS1_UP
			SanchezCarbayoJCO	MS1_UP
			StranskyNatGen	MS1_UP
201761_at	MTHFD2	methylenetetrahydrofolate dehydrogenase (NADP+ dependent) 2, methenyltetrahydrofolate cyclohydrolase	DyrskjotNatGen	MS2_UP	2485	1.36
			Kim Molecular Cancer 2010	MS2_UP
			SanchezCarbayoJCO	MS2_UP
			StranskyNatGen	MS2_UP
201438_at	COL6A3	collagen, type VI, alpha 3	DyrskjotNatGen	MS2_UP	2500	1.36
			Kim Molecular Cancer 2010	MS2_UP
			SanchezCarbayoJCO	MS2_UP
			StranskyNatGen	MS2_UP
1563466_at	MYLK	myosin light chain kinase	DyrskjotNatGen	MS2_UP	2543, 2685	1.33
			Kim Molecular Cancer 2010	MS2_UP
			SanchezCarbayoJCO	MS2_UP
			StranskyNatGen	MS2_UP
204718_at	EPHB6	EPH receptor B6	Kim Molecular Cancer 2010	MS1_UP	2572	-1.34
			Lindgren Cancer Research 2010	MS1_UP
			SanchezCarbayoJCO	MS1_UP
			StranskyNatGen	MS1_UP
202219_at	SLC6A8	solute carrier family 6 (neurotransmitter transporter, creatine), member 8	DyrskjotNatGen	MS1_UP	2612	-1.33
			Kim Molecular Cancer 2010	MS1_UP
			SanchezCarbayoJCO	MS1_UP
			StranskyNatGen	MS1_UP
201613_s_at	AP1G2	adaptor-related protein complex 1, gamma 2 subunit	Kim Molecular Cancer 2010	MS1_UP	2657	-1.32
			Lindgren Cancer Research 2010	MS1_UP
			SanchezCarbayoJCO	MS1_UP
			StranskyNatGen	MS1_UP
208817_at	COMT	catechol-O-methyltransferase	DyrskjotNatGen	MS1_UP	2659, 3471	-1.24
			Lindgren Cancer Research 2010	MS1_UP
			SanchezCarbayoJCO	MS1_UP
			StranskyNatGen	MS1_UP
200762_at	DPYSL2	dihydropyrimidinase-like 2	DyrskjotNatGen	MS2_UP	2672	1.32
			Kim Molecular Cancer 2010	MS2_UP
			SanchezCarbayoJCO	MS2_UP
			StranskyNatGen	MS2_UP
201425_at	ALDH2	aldehyde dehydrogenase 2 family (mitochondrial)	DyrskjotNatGen	MS2_UP	2729	1.31
			Kim Molecular Cancer 2010	MS2_UP
			SanchezCarbayoJCO	MS2_UP
			StranskyNatGen	MS2_UP
1559101_at	FYN	FYN oncogene related to SRC, FGR, YES	DyrskjotNatGen	MS2_UP	2749, 3397	1.23
			Lindgren Cancer Research 2010	MS2_UP
			SanchezCarbayoJCO	MS2_UP
			StranskyNatGen	MS2_UP
200635_s_at	PTPRF	protein tyrosine phosphatase, receptor type, F	DyrskjotNatGen	MS1_UP	2797, 4297, 4919, 6761	-0.971
			Lindgren Cancer Research 2010	MS1_UP
			SanchezCarbayoJCO	MS1_UP
			StranskyNatGen	MS1_UP
1567222_x_at	ELOVL5	ELOVL family member 5, elongation of long chain fatty acids (FEN1/Elo2, SUR4/Elo3-like, yeast)	Kim Molecular Cancer 2010	MS2_UP	2957	1.25
			Lindgren Cancer Research 2010	MS2_UP
			SanchezCarbayoJCO	MS2_UP
			StranskyNatGen	MS2_UP
203710_at	ITPR1	inositol 1,4,5-triphosphate receptor, type 1	Kim Molecular Cancer 2010	MS2_UP	3114, 4844	1.07
			Lindgren Cancer Research 2010	MS2_UP
			SanchezCarbayoJCO	MS2_UP
			StranskyNatGen	MS2_UP
1554965_at	FILIP1L	filamin A interacting protein 1-like	DyrskjotNatGen	MS2_UP	3190, 3560	1.17
			Kim Molecular Cancer 2010	MS2_UP
			SanchezCarbayoJCO	MS2_UP
			StranskyNatGen	MS2_UP
201744_s_at	LUM	lumican	DyrskjotNatGen	MS2_UP	3367	1.18
			Kim Molecular Cancer 2010	MS2_UP
			SanchezCarbayoJCO	MS2_UP
			StranskyNatGen	MS2_UP
202403_s_at	COL1A2	collagen, type I, alpha 2	DyrskjotNatGen	MS2_UP	3396, 4537	1.07
			Kim Molecular Cancer 2010	MS2_UP
			SanchezCarbayoJCO	MS2_UP
			StranskyNatGen	MS2_UP
207843_x_at	CYB5A	cytochrome b5 type A (microsomal)	DyrskjotNatGen	MS1_UP	3401, 3752, 3842	-1.12
			Kim Molecular Cancer 2010	MS2_UP
			SanchezCarbayoJCO	MS1_UP
			StranskyNatGen	MS1_UP
203477_at	COL15A1	collagen, type XV, alpha 1	DyrskjotNatGen	MS2_UP	3455	1.16
			Kim Molecular Cancer 2010	MS2_UP
			SanchezCarbayoJCO	MS2_UP
			StranskyNatGen	MS2_UP
1554828_at	PDGFRA*	platelet-derived growth factor receptor, alpha polypeptide	DyrskjotNatGen	MS2_UP	3638	1.12
			Kim Molecular Cancer 2010	MS2_UP
			SanchezCarbayoJCO	MS2_UP
			StranskyNatGen	MS2_UP
1557370_s_at	PAM	MYC binding protein 2	DyrskjotNatGen	MS2_UP	3651, 3964, 6573	0.96
			Kim Molecular Cancer 2010	MS2_UP
			SanchezCarbayoJCO	MS2_UP
			StranskyNatGen	MS2_UP
1561080_at	TXNRD1	thioredoxin reductase 1	DyrskjotNatGen	MS2_UP	3656	1.12
			Kim Molecular Cancer 2010	MS2_UP
			SanchezCarbayoJCO	MS2_UP
			StranskyNatGen	MS2_UP
202295_s_at	CTSH	cathepsin H	DyrskjotNatGen	MS1_UP	3765	-1.1
			Lindgren Cancer Research 2010	MS1_UP
			SanchezCarbayoJCO	MS1_UP
			StranskyNatGen	MS1_UP
201309_x_at	C5orf13	chromosome 5 open reading frame 13	DyrskjotNatGen	MS2_UP	3793, 4070	1.07
			Kim Molecular Cancer 2010	MS2_UP
			SanchezCarbayoJCO	MS2_UP
			StranskyNatGen	MS2_UP
211663_x_at	PTGDS	prostaglandin D2 synthase 21kDa (brain)	DyrskjotNatGen	MS2_UP	3875, 4181	1.05
			Kim Molecular Cancer 2010	MS2_UP
			SanchezCarbayoJCO	MS2_UP
			StranskyNatGen	MS2_UP
202931_x_at	BIN1	bridging integrator 1	DyrskjotNatGen	MS2_UP	3903, 4382, 5822	0.952
			Kim Molecular Cancer 2010	MS2_UP
			SanchezCarbayoJCO	MS2_UP
			StranskyNatGen	MS2_UP
218077_s_at	ZDHHC3	zinc finger, DHHC-type containing 3	Kim Molecular Cancer 2010	MS2_UP	3927, 5318	-0.961
			Lindgren Cancer Research 2010	MS1_UP
			SanchezCarbayoJCO	MS1_UP
			StranskyNatGen	MS1_UP
209289_at	NFIB*	nuclear factor I/B	DyrskjotNatGen	MS2_UP	3988	1.06
			Kim Molecular Cancer 2010	MS2_UP
			SanchezCarbayoJCO	MS2_UP
			StranskyNatGen	MS2_UP
200883_at	UQCRC2	ubiquinol-cytochrome c reductase core protein II	Kim Molecular Cancer 2010	MS2_UP	4140	-1.03
			Lindgren Cancer Research 2010	MS1_UP
			SanchezCarbayoJCO	MS1_UP
			StranskyNatGen	MS1_UP
1555037_a_at	IDH1*	isocitrate dehydrogenase 1 (NADP+), soluble	DyrskjotNatGen	MS1_UP	4480, 5116, 7254	-0.826
			Kim Molecular Cancer 2010	MS2_UP
			SanchezCarbayoJCO	MS1_UP
			StranskyNatGen	MS1_UP
202501_at	MAPRE2	microtubule-associated protein, RP/EB family, member 2	DyrskjotNatGen	MS2_UP	4840	0.924
			Kim Molecular Cancer 2010	MS2_UP
			SanchezCarbayoJCO	MS2_UP
			StranskyNatGen	MS2_UP
208322_s_at	ST3GAL1	ST3 beta-galactoside alpha-2,3-sialyltransferase 1	Kim Molecular Cancer 2010	MS1_UP	5956	-0.776
			Lindgren Cancer Research 2010	MS1_UP
			SanchezCarbayoJCO	MS1_UP
			StranskyNatGen	MS1_UP
217729_s_at	AES	amino-terminal enhancer of split	DyrskjotNatGen	MS1_UP	6233	-0.742
			Kim Molecular Cancer 2010	MS1_UP
			SanchezCarbayoJCO	MS1_UP
			StranskyNatGen	MS1_UP
201350_at	FLOT2	flotillin 2	DyrskjotNatGen	MS1_UP	7014	-0.648
			Lindgren Cancer Research 2010	MS1_UP
			SanchezCarbayoJCO	MS1_UP
			StranskyNatGen	MS1_UP
206239_s_at	SPINK1	serine peptidase inhibitor, Kazal type 1	DyrskjotNatGen	MS1_UP	5	-5.2
			SanchezCarbayoJCO	MS1_UP
			StranskyNatGen	MS1_UP
214624_at	UPK1A	uroplakin 1A	DyrskjotNatGen	MS1_UP	7	-4.95
			SanchezCarbayoJCO	MS1_UP
			StranskyNatGen	MS1_UP
202833_s_at	SERPINA1	serpin peptidase inhibitor, clade A (alpha-1 antiproteinase, antitrypsin), member 1	DyrskjotNatGen	MS2_UP	8, 40	4.37
			SanchezCarbayoJCO	MS2_UP
			StranskyNatGen	MS2_UP
204607_at	HMGCS2	3-hydroxy-3-methylglutaryl-CoA synthase 2 (mitochondrial)	DyrskjotNatGen	MS1_UP	15	-4.32
			SanchezCarbayoJCO	MS1_UP
			StranskyNatGen	MS1_UP
203915_at	CXCL9	chemokine (C-X-C motif) ligand 9	DyrskjotNatGen	MS2_UP	17	4.31
			SanchezCarbayoJCO	MS2_UP
			StranskyNatGen	MS2_UP
205856_at	SLC14A1	solute carrier family 14 (urea transporter), member 1 (Kidd blood group)	DyrskjotNatGen	MS1_UP	20, 51	-4.01
			Lindgren Cancer Research 2010	MS1_UP
			SanchezCarbayoJCO	MS1_UP
203645_s_at	CD163	CD163 molecule	Kim Molecular Cancer 2010	MS2_UP	26, 29	4.11
			SanchezCarbayoJCO	MS2_UP
			StranskyNatGen	MS2_UP
1555497_a_at	CYP4B1	cytochrome P450, family 4, subfamily B, polypeptide 1	DyrskjotNatGen	MS1_UP	28, 236	-3.54
			SanchezCarbayoJCO	MS1_UP
			StranskyNatGen	MS1_UP
205765_at	CYP3A5	cytochrome P450, family 3, subfamily A, polypeptide 5	Kim Molecular Cancer 2010	MS1_UP	42, 47, 156	-3.66
			SanchezCarbayoJCO	MS1_UP
			StranskyNatGen	MS1_UP
203913_s_at	HPGD	hydroxyprostaglandin dehydrogenase 15-(NAD)	DyrskjotNatGen	MS1_UP	46, 58, 99, 533	-3.36
			SanchezCarbayoJCO	MS1_UP
			StranskyNatGen	MS1_UP
1555777_at	POSTN	periostin, osteoblast specific factor	DyrskjotNatGen	MS2_UP	54, 131	3.55
			SanchezCarbayoJCO	MS2_UP
			StranskyNatGen	MS2_UP
204818_at	HSD17B2	hydroxysteroid (17-beta) dehydrogenase 2	DyrskjotNatGen	MS1_UP	63	-3.69
			SanchezCarbayoJCO	MS1_UP
			StranskyNatGen	MS1_UP
1557918_s_at	SLC16A1	solute carrier family 16, member 1 (monocarboxylic acid transporter 1)	DyrskjotNatGen	MS2_UP	64, 71, 104, 477	3.31
			SanchezCarbayoJCO	MS2_UP
			StranskyNatGen	MS2_UP
204378_at	BCAS1	breast carcinoma amplified sequence 1	Kim Molecular Cancer 2010	MS1_UP	75, 640	-2.94
			SanchezCarbayoJCO	MS1_UP
			StranskyNatGen	MS1_UP
1555758_a_at	CDKN3	cyclin-dependent kinase inhibitor 3	DyrskjotNatGen	MS2_UP	76, 412	3.08
			Kim Molecular Cancer 2010	MS2_UP
			StranskyNatGen	MS2_UP
1558338_at	SEMA6A	sema domain, transmembrane domain (TM), and cytoplasmic domain, (semaphorin) 6A	Kim Molecular Cancer 2010	MS1_UP	78, 80, 406, 1538	-2.85
			Lindgren Cancer Research 2010	MS1_UP
			StranskyNatGen	MS1_UP
1565673_at	FCGR2A	Fc fragment of IgG, low affinity IIa, receptor (CD32)	DyrskjotNatGen	MS2_UP	92	3.44
			SanchezCarbayoJCO	MS2_UP
			StranskyNatGen	MS2_UP
203153_at	IFIT1	interferon-induced protein with tetratricopeptide repeats 1	Kim Molecular Cancer 2010	MS2_UP	93	3.44
			SanchezCarbayoJCO	MS2_UP
			StranskyNatGen	MS2_UP
203571_s_at	C10orf116	chromosome 10 open reading frame 116	DyrskjotNatGen	MS1_UP	95	-3.43
			SanchezCarbayoJCO	MS1_UP
			StranskyNatGen	MS1_UP
203922_s_at	CYBB	cytochrome b-245, beta polypeptide	DyrskjotNatGen	MS2_UP	96, 875	2.75
			SanchezCarbayoJCO	MS2_UP
			StranskyNatGen	MS2_UP
1552480_s_at	PTPRC	protein tyrosine phosphatase, receptor type, C	DyrskjotNatGen	MS2_UP	100, 387, 391	2.9
			SanchezCarbayoJCO	MS2_UP
			StranskyNatGen	MS2_UP
205555_s_at	MSX2	msh homeobox 2	DyrskjotNatGen	MS1_UP	106, 2335	-2.41
			SanchezCarbayoJCO	MS1_UP
			StranskyNatGen	MS1_UP
204122_at	TYROBP	TYRO protein tyrosine kinase binding protein	Kim Molecular Cancer 2010	MS2_UP	109	3.38
			SanchezCarbayoJCO	MS2_UP
			StranskyNatGen	MS2_UP
205285_s_at	FYB	FYN binding protein	DyrskjotNatGen	MS2_UP	110, 251, 1425, 3854	2.28
			SanchezCarbayoJCO	MS2_UP
			StranskyNatGen	MS2_UP
202237_at	NNMT	nicotinamide N-methyltransferase	DyrskjotNatGen	MS2_UP	115, 580	2.86
			SanchezCarbayoJCO	MS2_UP
			StranskyNatGen	MS2_UP
204298_s_at	LOX	lysyl oxidase	DyrskjotNatGen	MS2_UP	123, 735	2.77
			SanchezCarbayoJCO	MS2_UP
			StranskyNatGen	MS2_UP
212224_at	ALDH1A1	aldehyde dehydrogenase 1 family, member A1	DyrskjotNatGen	MS2_UP	125	3.31
			Kim Molecular Cancer 2010	MS2_UP
			SanchezCarbayoJCO	MS2_UP
204465_s_at	INA	internexin neuronal intermediate filament protein, alpha	DyrskjotNatGen	MS1_UP	127	-3.31
			SanchezCarbayoJCO	MS1_UP
			StranskyNatGen	MS1_UP
212841_s_at	PPFIBP2	PTPRF interacting protein, binding protein 2 (liprin beta 2)	Kim Molecular Cancer 2010	MS1_UP	128	-3.31
			SanchezCarbayoJCO	MS1_UP
			StranskyNatGen	MS1_UP
209173_at	AGR2	anterior gradient homolog 2 (Xenopus laevis)	Lindgren Cancer Research 2010	MS1_UP	129, 908	-2.68
			SanchezCarbayoJCO	MS1_UP
			StranskyNatGen	MS1_UP
209395_at	CHI3L1	chitinase 3-like 1 (cartilage glycoprotein-39)	DyrskjotNatGen	MS2_UP	130, 489	2.89
			SanchezCarbayoJCO	MS2_UP
			StranskyNatGen	MS2_UP
204834_at	FGL2	fibrinogen-like 2	DyrskjotNatGen	MS2_UP	138, 199	3.17
			Kim Molecular Cancer 2010	MS2_UP
			SanchezCarbayoJCO	MS2_UP
201283_s_at	TRAK1	trafficking protein, kinesin binding 1	DyrskjotNatGen	MS1_UP	145, 269, 388, 536, 1547	-2.58
			SanchezCarbayoJCO	MS1_UP
			StranskyNatGen	MS1_UP
201645_at	TNC	tenascin C	DyrskjotNatGen	MS2_UP	158	3.19
			SanchezCarbayoJCO	MS2_UP
			StranskyNatGen	MS2_UP
203666_at	CXCL12	chemokine (C-X-C motif) ligand 12	DyrskjotNatGen	MS2_UP	169	3.14
			SanchezCarbayoJCO	MS2_UP
			StranskyNatGen	MS2_UP
205798_at	IL7R	interleukin 7 receptor	DyrskjotNatGen	MS2_UP	172, 520	2.79
			SanchezCarbayoJCO	MS2_UP
			StranskyNatGen	MS2_UP
205269_at	LCP2	lymphocyte cytosolic protein 2 (SH2 domain containing leukocyte protein of 76kDa)	DyrskjotNatGen	MS2_UP	178, 1733	2.36
			SanchezCarbayoJCO	MS2_UP
			StranskyNatGen	MS2_UP
203416_at	CD53	CD53 molecule	DyrskjotNatGen	MS2_UP	181	3.1
			SanchezCarbayoJCO	MS2_UP
			StranskyNatGen	MS2_UP
204326_x_at	MT1X	metallothionein 1X	Kim Molecular Cancer 2010	MS2_UP	183, 212	3.06
			SanchezCarbayoJCO	MS2_UP
			StranskyNatGen	MS2_UP
205073_at	CYP2J2	cytochrome P450, family 2, subfamily J, polypeptide 2	DyrskjotNatGen	MS1_UP	200	-3.06
			SanchezCarbayoJCO	MS1_UP
			StranskyNatGen	MS1_UP
209374_s_at	IGHM	immunoglobulin heavy constant mu	DyrskjotNatGen	MS2_UP	211, 475, 3932	2.2
			SanchezCarbayoJCO	MS2_UP
			StranskyNatGen	MS2_UP
203936_s_at	MMP9	matrix metallopeptidase 9 (gelatinase B, 92kDa gelatinase, 92kDa type IV collagenase)	DyrskjotNatGen	MS2_UP	213	3.02
			SanchezCarbayoJCO	MS2_UP
			StranskyNatGen	MS2_UP
204638_at	ACP5	acid phosphatase 5, tartrate resistant	DyrskjotNatGen	MS2_UP	230	2.98
			SanchezCarbayoJCO	MS2_UP
			StranskyNatGen	MS2_UP
209949_at	NCF2	neutrophil cytosolic factor 2	DyrskjotNatGen	MS2_UP	232	2.98
			SanchezCarbayoJCO	MS2_UP
			StranskyNatGen	MS2_UP
201720_s_at	LAPTM5	lysosomal protein transmembrane 5	DyrskjotNatGen	MS2_UP	241, 1122	2.43
			SanchezCarbayoJCO	MS2_UP
			StranskyNatGen	MS2_UP
202435_s_at	CYP1B1	cytochrome P450, family 1, subfamily B, polypeptide 1	Kim Molecular Cancer 2010	MS2_UP	243, 1147, 1163	2.24
			SanchezCarbayoJCO	MS2_UP
			StranskyNatGen	MS2_UP
208584_at	SNCG	synuclein, gamma (breast cancer-specific protein 1)	Lindgren Cancer Research 2010	MS1_UP	249	-2.94
			SanchezCarbayoJCO	MS1_UP
			StranskyNatGen	MS1_UP
212344_at	SULF1	sulfatase 1	Kim Molecular Cancer 2010	MS2_UP	263, 296, 427	2.77
			SanchezCarbayoJCO	MS2_UP
			StranskyNatGen	MS2_UP
204667_at	FOXA1	forkhead box A1	DyrskjotNatGen	MS1_UP	271, 629	-2.6
			SanchezCarbayoJCO	MS1_UP
			StranskyNatGen	MS1_UP
204612_at	PKIA	protein kinase (cAMP-dependent, catalytic) inhibitor alpha	Kim Molecular Cancer 2010	MS2_UP	275, 445	-2.72
			SanchezCarbayoJCO	MS1_UP
			StranskyNatGen	MS1_UP
211742_s_at	EVI2B	ecotropic viral integration site 2B	DyrskjotNatGen	MS2_UP	279	2.87
			SanchezCarbayoJCO	MS2_UP
			StranskyNatGen	MS2_UP
209266_s_at	SLC39A8	solute carrier family 39 (zinc transporter), member 8	Kim Molecular Cancer 2010	MS2_UP	280, 1858	2.21
			SanchezCarbayoJCO	MS2_UP
			StranskyNatGen	MS2_UP
1563252_at	ERBB3	v-erb-b2 erythroblastic leukemia viral oncogene homolog 3 (avian)	DyrskjotNatGen	MS1_UP	285, 420	-2.72
			SanchezCarbayoJCO	MS1_UP
			StranskyNatGen	MS1_UP
211990_at	HLA-DPA1	major histocompatibility complex, class II, DP alpha 1	Kim Molecular Cancer 2010	MS2_UP	289, 473, 1063	2.43
			SanchezCarbayoJCO	MS2_UP
			StranskyNatGen	MS2_UP
204698_at	ISG20	interferon stimulated exonuclease gene 20kDa	DyrskjotNatGen	MS2_UP	336, 743	2.46
			SanchezCarbayoJCO	MS2_UP
			StranskyNatGen	MS2_UP
204103_at	CCL4	chemokine (C-C motif) ligand 4	DyrskjotNatGen	MS2_UP	356	2.7
			SanchezCarbayoJCO	MS2_UP
			StranskyNatGen	MS2_UP
1554827_a_at	ADCY7	adenylate cyclase 7	DyrskjotNatGen	MS2_UP	360	2.7
			SanchezCarbayoJCO	MS2_UP
			StranskyNatGen	MS2_UP
204058_at	ME1	malic enzyme 1, NADP(+)-dependent, cytosolic	Kim Molecular Cancer 2010	MS2_UP	372, 694	2.46
			SanchezCarbayoJCO	MS2_UP
			StranskyNatGen	MS2_UP
205159_at	CSF2RB	colony stimulating factor 2 receptor, beta, low-affinity (granulocyte-macrophage)	Lindgren Cancer Research 2010	MS2_UP	379	2.65
			SanchezCarbayoJCO	MS2_UP
			StranskyNatGen	MS2_UP
201559_s_at	CLIC4	chloride intracellular channel 4	Kim Molecular Cancer 2010	MS2_UP	382, 454, 912	2.42
			SanchezCarbayoJCO	MS2_UP
			StranskyNatGen	MS2_UP
1555349_a_at	ITGB2	integrin, beta 2 (complement component 3 receptor 3 and 4 subunit)	DyrskjotNatGen	MS2_UP	383, 578	2.51
			SanchezCarbayoJCO	MS2_UP
			StranskyNatGen	MS2_UP
206461_x_at	MT1H	metallothionein 1H	DyrskjotNatGen	MS2_UP	385	2.64
			SanchezCarbayoJCO	MS2_UP
			StranskyNatGen	MS2_UP
200628_s_at	WARS	tryptophanyl-tRNA synthetase	DyrskjotNatGen	MS2_UP	414, 1103	2.26
			SanchezCarbayoJCO	MS2_UP
			StranskyNatGen	MS2_UP
207823_s_at	AIF1	allograft inflammatory factor 1	DyrskjotNatGen	MS2_UP	446, 778, 1018	2.23
			SanchezCarbayoJCO	MS2_UP
			StranskyNatGen	MS2_UP
202765_s_at	FBN1	fibrillin 1	DyrskjotNatGen	MS2_UP	455, 746, 1554	2.14
			SanchezCarbayoJCO	MS2_UP
			StranskyNatGen	MS2_UP
201601_x_at	IFITM1	interferon induced transmembrane protein 1 (9-27)	DyrskjotNatGen	MS2_UP	484, 965	2.25
			SanchezCarbayoJCO	MS2_UP
			StranskyNatGen	MS2_UP
214058_at	MYCL1*	v-myc myelocytomatosis viral oncogene homolog 1, lung carcinoma derived (avian)	DyrskjotNatGen	MS1_UP	496, 2445	-1.92
			SanchezCarbayoJCO	MS1_UP
			StranskyNatGen	MS1_UP
204503_at	EVPL	envoplakin	Kim Molecular Cancer 2010	MS1_UP	500	-2.47
			SanchezCarbayoJCO	MS1_UP
			StranskyNatGen	MS1_UP
203299_s_at	AP1S2	adaptor-related protein complex 1, sigma 2 subunit	Kim Molecular Cancer 2010	MS2_UP	505, 1462, 3488	1.78
			SanchezCarbayoJCO	MS2_UP
			StranskyNatGen	MS2_UP
200986_at	SERPING1	serpin peptidase inhibitor, clade G (C1 inhibitor), member 1	DyrskjotNatGen	MS2_UP	518	2.44
			SanchezCarbayoJCO	MS2_UP
			StranskyNatGen	MS2_UP
208146_s_at	CPVL	carboxypeptidase, vitellogenic-like	Kim Molecular Cancer 2010	MS2_UP	539	2.42
			SanchezCarbayoJCO	MS2_UP
			StranskyNatGen	MS2_UP
205098_at	CCR1	chemokine (C-C motif) receptor 1	DyrskjotNatGen	MS2_UP	550, 2154	1.94
			SanchezCarbayoJCO	MS2_UP
			StranskyNatGen	MS2_UP
204007_at	FCGR3B	Fc fragment of IgG, low affinity IIIb, receptor (CD16b)	DyrskjotNatGen	MS2_UP	556	2.4
			SanchezCarbayoJCO	MS2_UP
			StranskyNatGen	MS2_UP
208434_at	MECOM	MDS1 and EVI1 complex locus	Lindgren Cancer Research 2010	MS1_UP	563, 779, 2630, 3159	-1.77
			SanchezCarbayoJCO	MS1_UP
			StranskyNatGen	MS1_UP
209191_at	TUBB6	tubulin, beta 6	Kim Molecular Cancer 2010	MS2_UP	564	2.39
			Lindgren Cancer Research 2010	MS2_UP
			SanchezCarbayoJCO	MS2_UP
1566342_at	SOD2	superoxide dismutase 2, mitochondrial	DyrskjotNatGen	MS2_UP	586, 926, 2477, 4502	1.68
			Kim Molecular Cancer 2010	MS2_UP
			SanchezCarbayoJCO	MS2_UP
209621_s_at	PDLIM3	PDZ and LIM domain 3	Kim Molecular Cancer 2010	MS2_UP	634	2.31
			SanchezCarbayoJCO	MS2_UP
			StranskyNatGen	MS2_UP
201137_s_at	HLA-DPB1	major histocompatibility complex, class II, DP beta 1	DyrskjotNatGen	MS2_UP	660	2.28
			SanchezCarbayoJCO	MS2_UP
			StranskyNatGen	MS2_UP
208018_s_at	HCK	hemopoietic cell kinase	DyrskjotNatGen	MS2_UP	667	2.27
			SanchezCarbayoJCO	MS2_UP
			StranskyNatGen	MS2_UP
202974_at	MPP1	membrane protein, palmitoylated 1, 55kDa	DyrskjotNatGen	MS2_UP	672	2.26
			SanchezCarbayoJCO	MS2_UP
			StranskyNatGen	MS2_UP
205479_s_at	PLAU	plasminogen activator, urokinase	DyrskjotNatGen	MS2_UP	690, 1698	1.94
			SanchezCarbayoJCO	MS2_UP
			StranskyNatGen	MS2_UP
1554784_at	F3	contactin 1	DyrskjotNatGen	MS2_UP	703	2.24
			SanchezCarbayoJCO	MS2_UP
			StranskyNatGen	MS2_UP
203708_at	PDE4B	phosphodiesterase 4B, cAMP-specific	DyrskjotNatGen	MS2_UP	709	2.22
			SanchezCarbayoJCO	MS2_UP
			StranskyNatGen	MS2_UP
1554018_at	GPNMB	glycoprotein (transmembrane) nmb	Kim Molecular Cancer 2010	MS2_UP	731, 1240	2.02
			Lindgren Cancer Research 2010	MS2_UP
			SanchezCarbayoJCO	MS2_UP
204588_s_at	SLC7A7	solute carrier family 7 (cationic amino acid transporter, y+ system), member 7	Kim Molecular Cancer 2010	MS2_UP	741	2.2
			SanchezCarbayoJCO	MS2_UP
			StranskyNatGen	MS2_UP
202952_s_at	ADAM12	ADAM metallopeptidase domain 12	Lindgren Cancer Research 2010	MS2_UP	748, 1485	1.95
			SanchezCarbayoJCO	MS2_UP
			StranskyNatGen	MS2_UP
204284_at	PPP1R3C	protein phosphatase 1, regulatory (inhibitor) subunit 3C	Kim Molecular Cancer 2010	MS2_UP	753	-2.18
			SanchezCarbayoJCO	MS1_UP
			StranskyNatGen	MS1_UP
1554947_at	ACAT1	acetyl-CoA acetyltransferase 1	DyrskjotNatGen	MS2_UP	757	2.18
			Kim Molecular Cancer 2010	MS2_UP
			SanchezCarbayoJCO	MS2_UP
203066_at	CHST15	carbohydrate (N-acetylgalactosamine 4-sulfate 6-O) sulfotransferase 15	Lindgren Cancer Research 2010	MS2_UP	761	2.17
			SanchezCarbayoJCO	MS2_UP
			StranskyNatGen	MS2_UP
206084_at	PTPRR	protein tyrosine phosphatase, receptor type, R	DyrskjotNatGen	MS1_UP	762, 2439	-1.77
			SanchezCarbayoJCO	MS1_UP
			StranskyNatGen	MS1_UP
201107_s_at	THBS1	thrombospondin 1	Kim Molecular Cancer 2010	MS2_UP	769, 1078, 2599, 4365	1.61
			SanchezCarbayoJCO	MS2_UP
			StranskyNatGen	MS2_UP
201130_s_at	CDH1*	cadherin 1, type 1, E-cadherin (epithelial)	DyrskjotNatGen	MS1_UP	787	-2.15
			SanchezCarbayoJCO	MS1_UP
			StranskyNatGen	MS1_UP
204540_at	EEF1A2	eukaryotic translation elongation factor 1 alpha 2	DyrskjotNatGen	MS1_UP	798	-2.13
			Kim Molecular Cancer 2010	MS1_UP
			SanchezCarbayoJCO	MS1_UP
203541_s_at	KLF9	Kruppel-like factor 9	Kim Molecular Cancer 2010	MS2_UP	835, 3467	1.63
			SanchezCarbayoJCO	MS2_UP
			StranskyNatGen	MS2_UP
1555716_a_at	CXADR	coxsackie virus and adenovirus receptor	DyrskjotNatGen	MS1_UP	841	-2.1
			SanchezCarbayoJCO	MS1_UP
			StranskyNatGen	MS1_UP
1564796_at	EMP1	epithelial membrane protein 1	Kim Molecular Cancer 2010	MS2_UP	856, 2738	1.7
			SanchezCarbayoJCO	MS2_UP
			StranskyNatGen	MS2_UP
207954_at	GATA2*	GATA binding protein 2	Lindgren Cancer Research 2010	MS1_UP	882	-2.07
			SanchezCarbayoJCO	MS1_UP
			StranskyNatGen	MS1_UP
202283_at	SERPINF1	serpin peptidase inhibitor, clade F (alpha-2 antiplasmin, pigment epithelium derived factor), member 1	DyrskjotNatGen	MS2_UP	895	2.06
			SanchezCarbayoJCO	MS2_UP
			StranskyNatGen	MS2_UP
202269_x_at	GBP1	guanylate binding protein 1, interferon-inducible, 67kDa	Kim Molecular Cancer 2010	MS2_UP	929, 1565, 1646	1.79
			SanchezCarbayoJCO	MS2_UP
			StranskyNatGen	MS2_UP
204388_s_at	MAOA	monoamine oxidase A	DyrskjotNatGen	MS1_UP	938, 1196, 2250	-1.78
			SanchezCarbayoJCO	MS1_UP
			StranskyNatGen	MS1_UP
205127_at	PTGS1	prostaglandin-endoperoxide synthase 1 (prostaglandin G/H synthase and cyclooxygenase)	DyrskjotNatGen	MS2_UP	941, 994	2.01
			Kim Molecular Cancer 2010	MS2_UP
			SanchezCarbayoJCO	MS2_UP
201683_x_at	LCP1*	TOX high mobility group box family member 4	DyrskjotNatGen	MS2_UP	991	2
			SanchezCarbayoJCO	MS2_UP
			StranskyNatGen	MS2_UP
203868_s_at	VCAM1	vascular cell adhesion molecule 1	DyrskjotNatGen	MS2_UP	992	2
			SanchezCarbayoJCO	MS2_UP
			StranskyNatGen	MS2_UP
205459_s_at	NPAS2	neuronal PAS domain protein 2	DyrskjotNatGen	MS1_UP	1004, 1311, 4794	-1.57
			SanchezCarbayoJCO	MS1_UP
			StranskyNatGen	MS1_UP
212067_s_at	C1R	complement component 1, r subcomponent	DyrskjotNatGen	MS2_UP	1007	1.99
			SanchezCarbayoJCO	MS2_UP
			StranskyNatGen	MS2_UP
201792_at	AEBP1	AE binding protein 1	DyrskjotNatGen	MS2_UP	1017	1.98
			SanchezCarbayoJCO	MS2_UP
			StranskyNatGen	MS2_UP
201615_x_at	CALD1	caldesmon 1	DyrskjotNatGen	MS2_UP	1020, 1966, 3075	1.58
			SanchezCarbayoJCO	MS2_UP
			StranskyNatGen	MS2_UP
201235_s_at	BTG2	BTG family, member 2	DyrskjotNatGen	MS1_UP	1035	-1.97
			SanchezCarbayoJCO	MS1_UP
			StranskyNatGen	MS1_UP
213524_s_at	G0S2	G0/G1switch 2	DyrskjotNatGen	MS2_UP	1051	1.96
			SanchezCarbayoJCO	MS2_UP
			StranskyNatGen	MS2_UP
201599_at	OAT	ornithine aminotransferase	Kim Molecular Cancer 2010	MS2_UP	1052	1.96
			SanchezCarbayoJCO	MS2_UP
			StranskyNatGen	MS2_UP
203608_at	ALDH5A1	aldehyde dehydrogenase 5 family, member A1	Kim Molecular Cancer 2010	MS2_UP	1060	-1.95
			SanchezCarbayoJCO	MS1_UP
			StranskyNatGen	MS1_UP
205768_s_at	SLC27A2	solute carrier family 27 (fatty acid transporter), member 2	Kim Molecular Cancer 2010	MS2_UP	1062, 1523	-1.82
			SanchezCarbayoJCO	MS1_UP
			StranskyNatGen	MS1_UP
203126_at	IMPA2	inositol(myo)-1(or 4)-monophosphatase 2	Kim Molecular Cancer 2010	MS2_UP	1066	1.95
			Lindgren Cancer Research 2010	MS2_UP
			StranskyNatGen	MS2_UP
200755_s_at	CALU	calumenin	Kim Molecular Cancer 2010	MS2_UP	1072, 1600, 1957, 2965	1.6
			SanchezCarbayoJCO	MS2_UP
			StranskyNatGen	MS2_UP
209211_at	KLF5	Kruppel-like factor 5 (intestinal)	DyrskjotNatGen	MS1_UP	1081, 2751	-1.62
			SanchezCarbayoJCO	MS1_UP
			StranskyNatGen	MS1_UP
220661_s_at	ZNF692	zinc finger protein 692	Kim Molecular Cancer 2010	MS1_UP	1084	-1.93
			Lindgren Cancer Research 2010	MS1_UP
			SanchezCarbayoJCO	MS1_UP
201825_s_at	SCCPDH	saccharopine dehydrogenase (putative)	Lindgren Cancer Research 2010	MS1_UP	1138, 3231	-1.55
			SanchezCarbayoJCO	MS1_UP
			StranskyNatGen	MS1_UP
204070_at	RARRES3	retinoic acid receptor responder (tazarotene induced) 3	Kim Molecular Cancer 2010	MS2_UP	1141	1.89
			Lindgren Cancer Research 2010	MS2_UP
			SanchezCarbayoJCO	MS2_UP
200821_at	LAMP2	lysosomal-associated membrane protein 2	Kim Molecular Cancer 2010	MS2_UP	1154, 1227, 1976, 4131	1.57
			SanchezCarbayoJCO	MS2_UP
			StranskyNatGen	MS2_UP
201998_at	ST6GAL1	ST6 beta-galactosamide alpha-2,6-sialyltranferase 1	Kim Molecular Cancer 2010	MS2_UP	1162	1.88
			SanchezCarbayoJCO	MS2_UP
			StranskyNatGen	MS2_UP
200600_at	MSN*	moesin	DyrskjotNatGen	MS2_UP	1167	1.88
			SanchezCarbayoJCO	MS2_UP
			StranskyNatGen	MS2_UP
205239_at	AREG	amphiregulin	DyrskjotNatGen	MS2_UP	1171	1.88
			SanchezCarbayoJCO	MS2_UP
			StranskyNatGen	MS2_UP
202285_s_at	TACSTD2	tumor-associated calcium signal transducer 2	DyrskjotNatGen	MS1_UP	1202	-1.86
			SanchezCarbayoJCO	MS1_UP
			StranskyNatGen	MS1_UP
206539_s_at	CYP4F12	cytochrome P450, family 4, subfamily F, polypeptide 12	Kim Molecular Cancer 2010	MS1_UP	1217	-1.85
			SanchezCarbayoJCO	MS1_UP
			StranskyNatGen	MS1_UP
201430_s_at	DPYSL3	dihydropyrimidinase-like 3	DyrskjotNatGen	MS2_UP	1276, 1294	1.81
			SanchezCarbayoJCO	MS2_UP
			StranskyNatGen	MS2_UP
208306_x_at	HLA-DRB4	major histocompatibility complex, class II, DR beta 4	Kim Molecular Cancer 2010	MS2_UP	1298	1.8
			Lindgren Cancer Research 2010	MS2_UP
			SanchezCarbayoJCO	MS2_UP
202307_s_at	TAP1	transporter 1, ATP-binding cassette, sub-family B (MDR/TAP)	Lindgren Cancer Research 2010	MS2_UP	1312	1.79
			SanchezCarbayoJCO	MS2_UP
			StranskyNatGen	MS2_UP
212364_at	MYO1B	myosin IB	Lindgren Cancer Research 2010	MS2_UP	1314, 2256	1.61
			SanchezCarbayoJCO	MS2_UP
			StranskyNatGen	MS2_UP
204401_at	KCNN4	potassium intermediate/small conductance calcium-activated channel, subfamily N, member 4	Kim Molecular Cancer 2010	MS1_UP	1358	-1.76
			SanchezCarbayoJCO	MS1_UP
			StranskyNatGen	MS1_UP
209209_s_at	FERMT2	fermitin family member 2	DyrskjotNatGen	MS2_UP	1360, 2848	1.52
			SanchezCarbayoJCO	MS2_UP
			StranskyNatGen	MS2_UP
200982_s_at	ANXA6	annexin A6	DyrskjotNatGen	MS2_UP	1393	1.75
			SanchezCarbayoJCO	MS2_UP
			StranskyNatGen	MS2_UP
201785_at	RNASE1	ribonuclease, RNase A family, 1 (pancreatic)	DyrskjotNatGen	MS2_UP	1413	1.74
			Kim Molecular Cancer 2010	MS2_UP
			StranskyNatGen	MS2_UP
203470_s_at	PLEK	pleckstrin	DyrskjotNatGen	MS2_UP	1418, 3483	1.44
			Kim Molecular Cancer 2010	MS2_UP
			SanchezCarbayoJCO	MS2_UP
1555749_at	SF1	splicing factor 1	Kim Molecular Cancer 2010	MS1_UP	1440	-1.73
			Lindgren Cancer Research 2010	MS1_UP
			SanchezCarbayoJCO	MS2_UP
218849_s_at	PPP1R13L	protein phosphatase 1, regulatory (inhibitor) subunit 13 like	Kim Molecular Cancer 2010	MS1_UP	1450	-1.72
			Lindgren Cancer Research 2010	MS1_UP
			SanchezCarbayoJCO	MS1_UP
207630_s_at	CREM	cAMP responsive element modulator	Lindgren Cancer Research 2010	MS2_UP	1454, 1639, 2169, 2832	1.53
			SanchezCarbayoJCO	MS2_UP
			StranskyNatGen	MS2_UP
209156_s_at	COL6A2	collagen, type VI, alpha 2	DyrskjotNatGen	MS2_UP	1470, 3870	1.4
			SanchezCarbayoJCO	MS2_UP
			StranskyNatGen	MS2_UP
210930_s_at	ERBB2*	v-erb-b2 erythroblastic leukemia viral oncogene homolog 2, neuro/glioblastoma derived oncogene homolog (avian)	DyrskjotNatGen	MS1_UP	1479	-1.71
			Lindgren Cancer Research 2010	MS2_UP
			SanchezCarbayoJCO	MS1_UP
204472_at	GEM	GTP binding protein overexpressed in skeletal muscle	DyrskjotNatGen	MS2_UP	1492	1.71
			SanchezCarbayoJCO	MS2_UP
			StranskyNatGen	MS2_UP
204294_at	AMT	aminomethyltransferase	Kim Molecular Cancer 2010	MS1_UP	1512	-1.7
			Lindgren Cancer Research 2010	MS1_UP
			StranskyNatGen	MS1_UP
200730_s_at	PTP4A1	protein tyrosine phosphatase type IVA, member 1	Kim Molecular Cancer 2010	MS2_UP	1520, 2526, 4037	1.37
			SanchezCarbayoJCO	MS2_UP
			StranskyNatGen	MS2_UP
207002_s_at	PLAGL1	pleiomorphic adenoma gene-like 1	Lindgren Cancer Research 2010	MS2_UP	1556, 2362, 2812	1.46
			SanchezCarbayoJCO	MS2_UP
			StranskyNatGen	MS2_UP
208003_s_at	NFAT5	nuclear factor of activated T-cells 5, tonicity-responsive	Kim Molecular Cancer 2010	MS1_UP	1577, 1789, 4570	-1.41
			Lindgren Cancer Research 2010	MS1_UP
			SanchezCarbayoJCO	MS2_UP
202935_s_at	SOX9	SRY (sex determining region Y)-box 9	Lindgren Cancer Research 2010	MS2_UP	1579	1.67
			SanchezCarbayoJCO	MS2_UP
			StranskyNatGen	MS2_UP
204002_s_at	ICA1	islet cell autoantigen 1, 69kDa	Kim Molecular Cancer 2010	MS1_UP	1593, 2664	-1.49
			SanchezCarbayoJCO	MS1_UP
			StranskyNatGen	MS1_UP
203354_s_at	PSD3	pleckstrin and Sec7 domain containing 3	Lindgren Cancer Research 2010	MS1_UP	1640, 4628	-1.3
			SanchezCarbayoJCO	MS1_UP
			StranskyNatGen	MS1_UP
221942_s_at	GUCY1A3	guanylate cyclase 1, soluble, alpha 3	DyrskjotNatGen	MS2_UP	1656, 2530, 3575	1.38
			SanchezCarbayoJCO	MS2_UP
			StranskyNatGen	MS2_UP
203560_at	GGH	gamma-glutamyl hydrolase (conjugase, folylpolygammaglutamyl hydrolase)	Kim Molecular Cancer 2010	MS2_UP	1659	1.64
			Lindgren Cancer Research 2010	MS2_UP
			StranskyNatGen	MS2_UP
204116_at	IL2RG	interleukin 2 receptor, gamma	DyrskjotNatGen	MS2_UP	1680	1.63
			SanchezCarbayoJCO	MS2_UP
			StranskyNatGen	MS2_UP
209230_s_at	NUPR1	nuclear protein, transcriptional regulator, 1	Lindgren Cancer Research 2010	MS2_UP	1681	1.63
			SanchezCarbayoJCO	MS2_UP
			StranskyNatGen	MS2_UP
212091_s_at	COL6A1	collagen, type VI, alpha 1	DyrskjotNatGen	MS2_UP	1699, 2753, 5711	1.24
			SanchezCarbayoJCO	MS2_UP
			StranskyNatGen	MS2_UP
212311_at	SEL1L3	sel-1 suppressor of lin-12-like 3 (C. elegans)	Lindgren Cancer Research 2010	MS1_UP	1732	1.61
			SanchezCarbayoJCO	MS1_UP
			StranskyNatGen	MS1_UP
1557535_at	PALLD	palladin, cytoskeletal associated protein	Kim Molecular Cancer 2010	MS2_UP	1744, 2090, 3272	1.43
			SanchezCarbayoJCO	MS2_UP
			StranskyNatGen	MS2_UP
209101_at	CTGF	connective tissue growth factor	DyrskjotNatGen	MS2_UP	1751	1.6
			SanchezCarbayoJCO	MS2_UP
			StranskyNatGen	MS2_UP
213338_at	TMEM158	transmembrane protein 158 (gene/pseudogene)	Kim Molecular Cancer 2010	MS2_UP	1804	1.58
			SanchezCarbayoJCO	MS2_UP
			StranskyNatGen	MS2_UP
200887_s_at	STAT1	signal transducer and activator of transcription 1, 91kDa	Lindgren Cancer Research 2010	MS2_UP	1815, 2367	1.49
			SanchezCarbayoJCO	MS2_UP
			StranskyNatGen	MS2_UP
1557736_at	NKTR	natural killer-tumor recognition sequence	Kim Molecular Cancer 2010	MS1_UP	1823, 2631, 3920, 4565, 7080	-1.11
			Lindgren Cancer Research 2010	MS1_UP
			SanchezCarbayoJCO	MS2_UP
204444_at	KIF11	kinesin family member 11	Kim Molecular Cancer 2010	MS2_UP	1850	1.57
			Lindgren Cancer Research 2010	MS2_UP
			StranskyNatGen	MS2_UP
1558460_at	ABCC5	ATP-binding cassette, sub-family C (CFTR/MRP), member 5	Kim Molecular Cancer 2010	MS1_UP	1864, 3843	-1.32
			SanchezCarbayoJCO	MS1_UP
			StranskyNatGen	MS1_UP
204463_s_at	EDNRA	endothelin receptor type A	DyrskjotNatGen	MS2_UP	1956, 2837, 5821	1.2
			SanchezCarbayoJCO	MS2_UP
			StranskyNatGen	MS2_UP
218552_at	ECHDC2	enoyl CoA hydratase domain containing 2	Kim Molecular Cancer 2010	MS1_UP	1960, 2611	-1.43
			Lindgren Cancer Research 2010	MS1_UP
			SanchezCarbayoJCO	MS1_UP
209946_at	VEGFC	vascular endothelial growth factor C	Kim Molecular Cancer 2010	MS2_UP	1962	1.53
			SanchezCarbayoJCO	MS2_UP
			StranskyNatGen	MS2_UP
202699_s_at	TMEM63A	transmembrane protein 63A	Kim Molecular Cancer 2010	MS1_UP	1970, 4436	-1.25
			SanchezCarbayoJCO	MS1_UP
			StranskyNatGen	MS1_UP
212203_x_at	IFITM3	interferon induced transmembrane protein 3 (1-8U)	Kim Molecular Cancer 2010	MS2_UP	2006	1.52
			SanchezCarbayoJCO	MS2_UP
			StranskyNatGen	MS2_UP
202291_s_at	MGP	matrix Gla protein	DyrskjotNatGen	MS2_UP	2035	1.51
			Kim Molecular Cancer 2010	MS2_UP
			SanchezCarbayoJCO	MS2_UP
203320_at	SH2B3	SH2B adaptor protein 3	Kim Molecular Cancer 2010	MS2_UP	2038	1.51
			SanchezCarbayoJCO	MS2_UP
			StranskyNatGen	MS2_UP
204140_at	TPST1	tyrosylprotein sulfotransferase 1	Kim Molecular Cancer 2010	MS2_UP	2040	1.51
			SanchezCarbayoJCO	MS2_UP
			StranskyNatGen	MS2_UP
204114_at	NID2	nidogen 2 (osteonidogen)	DyrskjotNatGen	MS2_UP	2059	1.5
			SanchezCarbayoJCO	MS2_UP
			StranskyNatGen	MS2_UP
212624_s_at	CHN1*	chimerin (chimaerin) 1	DyrskjotNatGen	MS2_UP	2093	1.49
			SanchezCarbayoJCO	MS2_UP
			StranskyNatGen	MS2_UP
209507_at	RPA3	replication protein A3, 14kDa	Kim Molecular Cancer 2010	MS2_UP	2110	1.48
			Lindgren Cancer Research 2010	MS2_UP
			StranskyNatGen	MS2_UP
218574_s_at	LMCD1	LIM and cysteine-rich domains 1	Kim Molecular Cancer 2010	MS2_UP	2115	1.48
			Lindgren Cancer Research 2010	MS2_UP
			SanchezCarbayoJCO	MS2_UP
204486_at	KCNQ1	potassium voltage-gated channel, KQT-like subfamily, member 1	DyrskjotNatGen	MS1_UP	2130	-1.48
			Lindgren Cancer Research 2010	MS1_UP
			SanchezCarbayoJCO	MS1_UP
201289_at	CYR61	cysteine-rich, angiogenic inducer, 61	DyrskjotNatGen	MS2_UP	2156, 4469	1.22
			SanchezCarbayoJCO	MS2_UP
			StranskyNatGen	MS2_UP
207761_s_at	METTL7A	methyltransferase like 7A	Lindgren Cancer Research 2010	MS1_UP	2162, 3877, 5242	-1.14
			SanchezCarbayoJCO	MS1_UP
			StranskyNatGen	MS1_UP
203393_at	HES1	hairy and enhancer of split 1, (Drosophila)	DyrskjotNatGen	MS1_UP	2172, 5054	-1.18
			SanchezCarbayoJCO	MS1_UP
			StranskyNatGen	MS1_UP
209261_s_at	NR2F6	nuclear receptor subfamily 2, group F, member 6	DyrskjotNatGen	MS1_UP	2173	-1.46
			SanchezCarbayoJCO	MS1_UP
			StranskyNatGen	MS1_UP
200872_at	S100A10	S100 calcium binding protein A10	Kim Molecular Cancer 2010	MS2_UP	2194	1.45
			SanchezCarbayoJCO	MS2_UP
			StranskyNatGen	MS2_UP
201315_x_at	IFITM2	interferon induced transmembrane protein 2 (1-8D)	Kim Molecular Cancer 2010	MS2_UP	2257	1.43
			SanchezCarbayoJCO	MS2_UP
			StranskyNatGen	MS2_UP
1555056_at	CCNG2	cyclin G2	DyrskjotNatGen	MS1_UP	2274	-1.43
			SanchezCarbayoJCO	MS1_UP
			StranskyNatGen	MS1_UP
202497_x_at	SLC2A3	solute carrier family 2 (facilitated glucose transporter), member 3	DyrskjotNatGen	MS2_UP	2288, 2450, 2981	1.35
			SanchezCarbayoJCO	MS2_UP
			StranskyNatGen	MS2_UP
202035_s_at	SFRP1	secreted frizzled-related protein 1	Kim Molecular Cancer 2010	MS2_UP	2313	1.42
			SanchezCarbayoJCO	MS2_UP
			StranskyNatGen	MS2_UP
202488_s_at	FXYD3	FXYD domain containing ion transport regulator 3	DyrskjotNatGen	MS1_UP	2317, 3784	-1.26
			SanchezCarbayoJCO	MS1_UP
			StranskyNatGen	MS1_UP
204204_at	SLC31A2	solute carrier family 31 (copper transporters), member 2	Kim Molecular Cancer 2010	MS2_UP	2356	1.4
			Lindgren Cancer Research 2010	MS2_UP
			SanchezCarbayoJCO	MS2_UP
218193_s_at	GOLT1B	golgi transport 1B	Kim Molecular Cancer 2010	MS2_UP	2360, 5762	1.1
			Lindgren Cancer Research 2010	MS2_UP
			SanchezCarbayoJCO	MS2_UP
201923_at	PRDX4	peroxiredoxin 4	Kim Molecular Cancer 2010	MS2_UP	2392	1.39
			Lindgren Cancer Research 2010	MS2_UP
			StranskyNatGen	MS2_UP
201028_s_at	CD99	CD99 molecule	Kim Molecular Cancer 2010	MS2_UP	2395, 6512	1.05
			SanchezCarbayoJCO	MS2_UP
			StranskyNatGen	MS2_UP
209605_at	TST	thiosulfate sulfurtransferase (rhodanese)	DyrskjotNatGen	MS1_UP	2402	-1.39
			SanchezCarbayoJCO	MS1_UP
			StranskyNatGen	MS1_UP
204740_at	CNKSR1	connector enhancer of kinase suppressor of Ras 1	Kim Molecular Cancer 2010	MS1_UP	2411	-1.38
			SanchezCarbayoJCO	MS1_UP
			StranskyNatGen	MS1_UP
202643_s_at	TNFAIP3*	tumor necrosis factor, alpha-induced protein 3	DyrskjotNatGen	MS2_UP	2433	1.38
			SanchezCarbayoJCO	MS2_UP
			StranskyNatGen	MS2_UP
205624_at	CPA3	carboxypeptidase A3 (mast cell)	DyrskjotNatGen	MS2_UP	2441	1.37
			SanchezCarbayoJCO	MS2_UP
			StranskyNatGen	MS2_UP
205116_at	LAMA2	laminin, alpha 2	DyrskjotNatGen	MS2_UP	2442, 3204, 6551	1.09
			SanchezCarbayoJCO	MS2_UP
			StranskyNatGen	MS2_UP
202412_s_at	USP1	ubiquitin specific peptidase 1	Kim Molecular Cancer 2010	MS2_UP	2443, 6231	1.06
			SanchezCarbayoJCO	MS2_UP
			StranskyNatGen	MS2_UP
206582_s_at	GPR56	G protein-coupled receptor 56	Lindgren Cancer Research 2010	MS1_UP	2456	-1.37
			SanchezCarbayoJCO	MS1_UP
			StranskyNatGen	MS1_UP
202889_x_at	MAP7	microtubule-associated protein 7	DyrskjotNatGen	MS1_UP	2470	-1.36
			Lindgren Cancer Research 2010	MS1_UP
			SanchezCarbayoJCO	MS1_UP
219749_at	SH2D4A	SH2 domain containing 4A	Kim Molecular Cancer 2010	MS1_UP	2473	-1.36
			Lindgren Cancer Research 2010	MS1_UP
			SanchezCarbayoJCO	MS1_UP
202580_x_at	FOXM1	forkhead box M1	DyrskjotNatGen	MS2_UP	2491	1.36
			Lindgren Cancer Research 2010	MS2_UP
			StranskyNatGen	MS2_UP
213502_x_at	LOC91316	glucuronidase, beta/immunoglobulin lambda-like polypeptide 1 pseudogene	DyrskjotNatGen	MS2_UP	2504	1.36
			SanchezCarbayoJCO	MS2_UP
			StranskyNatGen	MS2_UP
202465_at	PCOLCE	procollagen C-endopeptidase enhancer	DyrskjotNatGen	MS2_UP	2511	1.36
			SanchezCarbayoJCO	MS2_UP
			StranskyNatGen	MS2_UP
200951_s_at	CCND2*	cyclin D2	DyrskjotNatGen	MS2_UP	2514	1.36
			Kim Molecular Cancer 2010	MS2_UP
			SanchezCarbayoJCO	MS2_UP
205396_at	SMAD3	SMAD family member 3	DyrskjotNatGen	MS1_UP	2523	-1.36
			SanchezCarbayoJCO	MS1_UP
			StranskyNatGen	MS1_UP
201389_at	ITGA5	integrin, alpha 5 (fibronectin receptor, alpha polypeptide)	DyrskjotNatGen	MS2_UP	2560	1.35
			SanchezCarbayoJCO	MS2_UP
			StranskyNatGen	MS2_UP
201060_x_at	STOM	stomatin	DyrskjotNatGen	MS2_UP	2576, 4035	1.2
			SanchezCarbayoJCO	MS2_UP
			StranskyNatGen	MS2_UP
203367_at	DUSP14	dual specificity phosphatase 14	Kim Molecular Cancer 2010	MS2_UP	2586	1.34
			SanchezCarbayoJCO	MS2_UP
			StranskyNatGen	MS2_UP
202430_s_at	PLSCR1	phospholipid scramblase 1	Kim Molecular Cancer 2010	MS2_UP	2589, 2818	1.31
			Lindgren Cancer Research 2010	MS2_UP
			SanchezCarbayoJCO	MS2_UP
201020_at	YWHAH	tyrosine 3-monooxygenase/tryptophan 5-monooxygenase activation protein, eta polypeptide	DyrskjotNatGen	MS2_UP	2641	1.33
			Lindgren Cancer Research 2010	MS2_UP
			StranskyNatGen	MS2_UP
210150_s_at	LAMA5	laminin, alpha 5	Kim Molecular Cancer 2010	MS1_UP	2650	-1.33
			SanchezCarbayoJCO	MS1_UP
			StranskyNatGen	MS1_UP
209283_at	CRYAB	crystallin, alpha B	DyrskjotNatGen	MS2_UP	2666	1.32
			SanchezCarbayoJCO	MS2_UP
			StranskyNatGen	MS2_UP
209496_at	RARRES2	retinoic acid receptor responder (tazarotene induced) 2	DyrskjotNatGen	MS2_UP	2701	1.31
			SanchezCarbayoJCO	MS2_UP
			StranskyNatGen	MS2_UP
213001_at	ANGPTL2	angiopoietin-like 2	Kim Molecular Cancer 2010	MS2_UP	2708, 5623	1.06
			SanchezCarbayoJCO	MS2_UP
			StranskyNatGen	MS2_UP
200859_x_at	FLNA	filamin A, alpha	DyrskjotNatGen	MS2_UP	2728, 2922, 3067	1.27
			SanchezCarbayoJCO	MS2_UP
			StranskyNatGen	MS2_UP
205455_at	MST1R	macrophage stimulating 1 receptor (c-met-related tyrosine kinase)	Kim Molecular Cancer 2010	MS1_UP	2735	-1.31
			SanchezCarbayoJCO	MS1_UP
			StranskyNatGen	MS1_UP
1554692_at	SLC23A2	solute carrier family 23 (nucleobase transporters), member 2	Lindgren Cancer Research 2010	MS1_UP	2875	-1.27
			SanchezCarbayoJCO	MS1_UP
			StranskyNatGen	MS1_UP
204170_s_at	CKS2	CDC28 protein kinase regulatory subunit 2	Kim Molecular Cancer 2010	MS2_UP	2906	1.27
			SanchezCarbayoJCO	MS2_UP
			StranskyNatGen	MS2_UP
201185_at	HTRA1	HtrA serine peptidase 1	DyrskjotNatGen	MS2_UP	2925	1.26
			SanchezCarbayoJCO	MS2_UP
			StranskyNatGen	MS2_UP
202006_at	PTPN12	protein tyrosine phosphatase, non-receptor type 12	Kim Molecular Cancer 2010	MS2_UP	2963, 5087	1.07
			SanchezCarbayoJCO	MS2_UP
			StranskyNatGen	MS2_UP
207836_s_at	RBPMS	RNA binding protein with multiple splicing	Lindgren Cancer Research 2010	MS1_UP	2986, 3673, 3936	-1.14
			SanchezCarbayoJCO	MS1_UP
			StranskyNatGen	MS1_UP
205253_at	PBX1*	pre-B-cell leukemia homeobox 1	Kim Molecular Cancer 2010	MS1_UP	3070, 3226	-1.21
			SanchezCarbayoJCO	MS1_UP
			StranskyNatGen	MS1_UP
204138_s_at	MZF1	myeloid zinc finger 1	Kim Molecular Cancer 2010	MS1_UP	3085, 3175, 3233	-1.21
			SanchezCarbayoJCO	MS1_UP
			StranskyNatGen	MS1_UP
202997_s_at	LOXL2	lysyl oxidase-like 2	DyrskjotNatGen	MS2_UP	3100	1.22
			SanchezCarbayoJCO	MS2_UP
			StranskyNatGen	MS2_UP
205437_at	ZNF211	zinc finger protein 211	Kim Molecular Cancer 2010	MS1_UP	3119	-1.22
			SanchezCarbayoJCO	MS1_UP
			StranskyNatGen	MS1_UP
1555395_at	AKAP12	A kinase (PRKA) anchor protein 12	DyrskjotNatGen	MS2_UP	3195	1.21
			Lindgren Cancer Research 2010	MS2_UP
			SanchezCarbayoJCO	MS2_UP
204014_at	DUSP4	dual specificity phosphatase 4	Kim Molecular Cancer 2010	MS1_UP	3211	-1.2
			Lindgren Cancer Research 2010	MS1_UP
			StranskyNatGen	MS1_UP
204023_at	RFC4	replication factor C (activator 1) 4, 37kDa	DyrskjotNatGen	MS2_UP	3220	1.2
			Lindgren Cancer Research 2010	MS2_UP
			StranskyNatGen	MS2_UP
209890_at	TSPAN5	tetraspanin 5	Lindgren Cancer Research 2010	MS2_UP	3235	1.2
			SanchezCarbayoJCO	MS2_UP
			StranskyNatGen	MS2_UP
202709_at	FMOD	fibromodulin	DyrskjotNatGen	MS2_UP	3236	1.2
			SanchezCarbayoJCO	MS2_UP
			StranskyNatGen	MS2_UP
200934_at	DEK*	DEK oncogene	Kim Molecular Cancer 2010	MS2_UP	3239	1.2
			Lindgren Cancer Research 2010	MS2_UP
			SanchezCarbayoJCO	MS2_UP
208850_s_at	THY1	Thy-1 cell surface antigen	DyrskjotNatGen	MS2_UP	3244	1.19
			SanchezCarbayoJCO	MS2_UP
			StranskyNatGen	MS2_UP
1569748_at	PRKCZ	protein kinase C, zeta	DyrskjotNatGen	MS1_UP	3267	-1.19
			SanchezCarbayoJCO	MS1_UP
			StranskyNatGen	MS1_UP
204083_s_at	TPM2	tropomyosin 2 (beta)	DyrskjotNatGen	MS2_UP	3269	1.19
			SanchezCarbayoJCO	MS2_UP
			StranskyNatGen	MS2_UP
201732_s_at	CLCN3	chloride channel 3	DyrskjotNatGen	MS1_UP	3408, 4631, 4872	-1.01
			Lindgren Cancer Research 2010	MS1_UP
			SanchezCarbayoJCO	MS1_UP
218224_at	PNMA1	paraneoplastic antigen MA1	Kim Molecular Cancer 2010	MS2_UP	3416	1.16
			Lindgren Cancer Research 2010	MS2_UP
			SanchezCarbayoJCO	MS2_UP
202910_s_at	CD97	CD97 molecule	DyrskjotNatGen	MS2_UP	3500	1.15
			Kim Molecular Cancer 2010	MS2_UP
			StranskyNatGen	MS2_UP
204766_s_at	NUDT1	nudix (nucleoside diphosphate linked moiety X)-type motif 1	DyrskjotNatGen	MS2_UP	3610	1.13
			Lindgren Cancer Research 2010	MS2_UP
			StranskyNatGen	MS2_UP
1554728_at	SLC9A1	solute carrier family 9 (sodium/hydrogen exchanger), member 1	Lindgren Cancer Research 2010	MS1_UP	3630	-1.12
			SanchezCarbayoJCO	MS1_UP
			StranskyNatGen	MS1_UP
1555540_at	TGFB3	transforming growth factor, beta 3	DyrskjotNatGen	MS2_UP	3634	1.12
			SanchezCarbayoJCO	MS2_UP
			StranskyNatGen	MS2_UP
1559921_at	PECAM1	platelet/endothelial cell adhesion molecule	DyrskjotNatGen	MS2_UP	3652, 5942	0.95
			SanchezCarbayoJCO	MS2_UP
			StranskyNatGen	MS2_UP
1556499_s_at	COL1A1*	collagen, type I, alpha 1	DyrskjotNatGen	MS2_UP	3695	1.11
			SanchezCarbayoJCO	MS2_UP
			StranskyNatGen	MS2_UP
207351_s_at	SCAP	SH2 domain containing 2A	Kim Molecular Cancer 2010	MS1_UP	3777	-1.09
			SanchezCarbayoJCO	MS1_UP
			StranskyNatGen	MS1_UP
214103_s_at	RAP2A	RAP2A, member of RAS oncogene family	Kim Molecular Cancer 2010	MS2_UP	3783, 7329	0.852
			Lindgren Cancer Research 2010	MS2_UP
			SanchezCarbayoJCO	MS2_UP
1558960_a_at	MFGE8	milk fat globule-EGF factor 8 protein	DyrskjotNatGen	MS2_UP	3813	1.09
			SanchezCarbayoJCO	MS2_UP
			StranskyNatGen	MS2_UP
212176_at	SFRS18	splicing factor, arginine/serine-rich 18	Lindgren Cancer Research 2010	MS1_UP	3823, 4100, 5216	-0.998
			SanchezCarbayoJCO	MS2_UP
			StranskyNatGen	MS1_UP
202426_s_at	RXRA	retinoid X receptor, alpha	Kim Molecular Cancer 2010	MS1_UP	3880	-1.08
			SanchezCarbayoJCO	MS1_UP
			StranskyNatGen	MS1_UP
204269_at	PIM2	pim-2 oncogene	Lindgren Cancer Research 2010	MS2_UP	3898	1.07
			SanchezCarbayoJCO	MS2_UP
			StranskyNatGen	MS2_UP
203911_at	RAP1GAP	RAP1 GTPase activating protein	DyrskjotNatGen	MS1_UP	3921	-1.07
			Kim Molecular Cancer 2010	MS1_UP
			SanchezCarbayoJCO	MS1_UP
1555319_at	STAB1	stabilin 1	DyrskjotNatGen	MS2_UP	4023, 6035	0.91
			SanchezCarbayoJCO	MS2_UP
			StranskyNatGen	MS2_UP
201259_s_at	SYPL1	synaptophysin-like 1	Kim Molecular Cancer 2010	MS2_UP	4048	1.05
			SanchezCarbayoJCO	MS1_UP
			StranskyNatGen	MS1_UP
209179_s_at	MBOAT7	membrane bound O-acyltransferase domain containing 7	DyrskjotNatGen	MS1_UP	4051	-1.05
			SanchezCarbayoJCO	MS1_UP
			StranskyNatGen	MS1_UP
201263_at	TARS	threonyl-tRNA synthetase	Kim Molecular Cancer 2010	MS2_UP	4208	1.02
			Lindgren Cancer Research 2010	MS2_UP
			StranskyNatGen	MS2_UP
1555526_a_at	SEPT6*	septin 6	Lindgren Cancer Research 2010	MS1_UP	4358, 5716	0.9
			SanchezCarbayoJCO	MS2_UP
			StranskyNatGen	MS2_UP
205125_at	PLCD1	phospholipase C, delta 1	DyrskjotNatGen	MS1_UP	4364	-0.995
			Lindgren Cancer Research 2010	MS1_UP
			SanchezCarbayoJCO	MS1_UP
212233_at	MAP1B	microtubule-associated protein 1B	DyrskjotNatGen	MS2_UP	4385	0.992
			SanchezCarbayoJCO	MS2_UP
			StranskyNatGen	MS2_UP
209118_s_at	TUBA1A	tubulin, alpha 1a	DyrskjotNatGen	MS2_UP	4467	0.978
			Kim Molecular Cancer 2010	MS2_UP
			SanchezCarbayoJCO	MS2_UP
202025_x_at	ACAA1	acetyl-CoA acyltransferase 1	DyrskjotNatGen	MS1_UP	4470, 5369	-0.912
			SanchezCarbayoJCO	MS1_UP
			StranskyNatGen	MS1_UP
208795_s_at	MCM7	minichromosome maintenance complex component 7	Lindgren Cancer Research 2010	MS2_UP	4492	0.972
			SanchezCarbayoJCO	MS1_UP
			StranskyNatGen	MS2_UP
201579_at	FAT1	FAT tumor suppressor homolog 1 (Drosophila)	DyrskjotNatGen	MS1_UP	4673	-0.946
			SanchezCarbayoJCO	MS1_UP
			StranskyNatGen	MS1_UP
202609_at	EPS8	epidermal growth factor receptor pathway substrate 8	Lindgren Cancer Research 2010	MS1_UP	4740	-0.938
			SanchezCarbayoJCO	MS1_UP
			StranskyNatGen	MS1_UP
203358_s_at	EZH2*	enhancer of zeste homolog 2 (Drosophila)	DyrskjotNatGen	MS2_UP	4746	0.938
			Lindgren Cancer Research 2010	MS2_UP
			StranskyNatGen	MS2_UP
202202_s_at	LAMA4	laminin, alpha 4	DyrskjotNatGen	MS2_UP	4815	0.927
			SanchezCarbayoJCO	MS2_UP
			StranskyNatGen	MS2_UP
202181_at	KIAA0247	KIAA0247	DyrskjotNatGen	MS2_UP	4864	0.919
			SanchezCarbayoJCO	MS2_UP
			StranskyNatGen	MS2_UP
209341_s_at	IKBKB	inhibitor of kappa light polypeptide gene enhancer in B-cells, kinase beta	Kim Molecular Cancer 2010	MS1_UP	4904, 6027	-0.84
			Lindgren Cancer Research 2010	MS1_UP
			StranskyNatGen	MS1_UP
201215_at	PLS3	plastin 3	Kim Molecular Cancer 2010	MS2_UP	4909	0.912
			Lindgren Cancer Research 2010	MS2_UP
			SanchezCarbayoJCO	MS2_UP
209355_s_at	PPAP2B	phosphatidic acid phosphatase type 2B	Kim Molecular Cancer 2010	MS2_UP	4960	-0.904
			Lindgren Cancer Research 2010	MS1_UP
			SanchezCarbayoJCO	MS2_UP
201547_at	KDM5B	lysine (K)-specific demethylase 5B	Lindgren Cancer Research 2010	MS1_UP	5001, 7012, 7089	-0.728
			SanchezCarbayoJCO	MS1_UP
			StranskyNatGen	MS1_UP
1007_s_at	DDR1	discoidin domain receptor tyrosine kinase 1	DyrskjotNatGen	MS1_UP	5109, 5501, 5969, 6190	-0.808
			SanchezCarbayoJCO	MS1_UP
			StranskyNatGen	MS1_UP
201631_s_at	IER3	immediate early response 3	DyrskjotNatGen	MS2_UP	5159	0.877
			SanchezCarbayoJCO	MS2_UP
			StranskyNatGen	MS2_UP
200665_s_at	SPARC	secreted protein, acidic, cysteine-rich (osteonectin)	DyrskjotNatGen	MS2_UP	5268, 5600	0.839
			SanchezCarbayoJCO	MS2_UP
			StranskyNatGen	MS2_UP
200752_s_at	CAPN1	calpain 1, (mu/I) large subunit	DyrskjotNatGen	MS1_UP	5270, 6185	-0.805
			SanchezCarbayoJCO	MS1_UP
			StranskyNatGen	MS1_UP
1557649_at	GALE	UDP-galactose-4-epimerase	DyrskjotNatGen	MS1_UP	5276	-0.861
			SanchezCarbayoJCO	MS1_UP
			StranskyNatGen	MS1_UP
212692_s_at	LRBA	LPS-responsive vesicle trafficking, beach and anchor containing	DyrskjotNatGen	MS1_UP	5333, 6548	-0.777
			Lindgren Cancer Research 2010	MS1_UP
			StranskyNatGen	MS1_UP
204168_at	MGST2	microsomal glutathione S-transferase 2	Lindgren Cancer Research 2010	MS1_UP	5384	-0.845
			SanchezCarbayoJCO	MS1_UP
			StranskyNatGen	MS1_UP
202273_at	PDGFRB*	platelet-derived growth factor receptor, beta polypeptide	DyrskjotNatGen	MS2_UP	5399	0.843
			SanchezCarbayoJCO	MS2_UP
			StranskyNatGen	MS2_UP
208768_x_at	RPL22*	ribosomal protein L22	Kim Molecular Cancer 2010	MS2_UP	5448	-0.836
			SanchezCarbayoJCO	MS1_UP
			StranskyNatGen	MS1_UP
209340_at	UAP1	UDP-N-acteylglucosamine pyrophosphorylase 1	Kim Molecular Cancer 2010	MS2_UP	5580	0.818
			SanchezCarbayoJCO	MS2_UP
			StranskyNatGen	MS2_UP
200651_at	GNB2L1	guanine nucleotide binding protein (G protein), beta polypeptide 2-like 1	Lindgren Cancer Research 2010	MS1_UP	5634	-0.811
			SanchezCarbayoJCO	MS1_UP
			StranskyNatGen	MS1_UP
200863_s_at	RAB11A	RAB11A, member RAS oncogene family	Lindgren Cancer Research 2010	MS1_UP	5663	-0.808
			SanchezCarbayoJCO	MS1_UP
			StranskyNatGen	MS1_UP
1598_g_at	GAS6	growth arrest-specific 6	DyrskjotNatGen	MS2_UP	5715	0.803
			SanchezCarbayoJCO	MS2_UP
			StranskyNatGen	MS2_UP
204115_at	GNG11	guanine nucleotide binding protein (G protein), gamma 11	Kim Molecular Cancer 2010	MS2_UP	6011	0.768
			SanchezCarbayoJCO	MS2_UP
			StranskyNatGen	MS2_UP
204231_s_at	FAAH	fatty acid amide hydrolase	Kim Molecular Cancer 2010	MS1_UP	6050	-0.764
			SanchezCarbayoJCO	MS1_UP
			StranskyNatGen	MS1_UP
202814_s_at	HEXIM1	hexamethylene bis-acetamide inducible 1	Lindgren Cancer Research 2010	MS1_UP	6115	-0.755
			SanchezCarbayoJCO	MS1_UP
			StranskyNatGen	MS1_UP
200710_at	ACADVL	acyl-CoA dehydrogenase, very long chain	Kim Molecular Cancer 2010	MS1_UP	6243	-0.742
			SanchezCarbayoJCO	MS1_UP
			StranskyNatGen	MS1_UP
200878_at	EPAS1	endothelial PAS domain protein 1	DyrskjotNatGen	MS1_UP	6312	-0.733
			SanchezCarbayoJCO	MS1_UP
			StranskyNatGen	MS1_UP
201930_at	MCM6	minichromosome maintenance complex component 6	DyrskjotNatGen	MS2_UP	6328	0.731
			Lindgren Cancer Research 2010	MS2_UP
			StranskyNatGen	MS2_UP
205356_at	USP13	ubiquitin specific peptidase 13 (isopeptidase T-3)	DyrskjotNatGen	MS2_UP	6344, 7187	0.678
			SanchezCarbayoJCO	MS2_UP
			StranskyNatGen	MS2_UP
1555632_at	PIK3IP1	phosphoinositide-3-kinase interacting protein 1	DyrskjotNatGen	MS1_UP	6414	-0.721
			SanchezCarbayoJCO	MS1_UP
			StranskyNatGen	MS1_UP
203894_at	TUBG2	tubulin, gamma 2	Kim Molecular Cancer 2010	MS1_UP	6486	-0.712
			Lindgren Cancer Research 2010	MS1_UP
			SanchezCarbayoJCO	MS1_UP
204440_at	CD83	CD83 molecule	DyrskjotNatGen	MS2_UP	6549	0.703
			SanchezCarbayoJCO	MS2_UP
			StranskyNatGen	MS2_UP
1569086_at	EML2	echinoderm microtubule associated protein like 2	Kim Molecular Cancer 2010	MS1_UP	6665	-0.69
			Lindgren Cancer Research 2010	MS1_UP
			StranskyNatGen	MS1_UP
211987_at	TOP2B	topoisomerase (DNA) II beta 180kDa	Kim Molecular Cancer 2010	MS2_UP	6750	-0.678
			SanchezCarbayoJCO	MS1_UP
			StranskyNatGen	MS1_UP
203593_at	CD2AP	CD2-associated protein	Kim Molecular Cancer 2010	MS2_UP	6850	-0.668
			SanchezCarbayoJCO	MS1_UP
			StranskyNatGen	MS1_UP
1552803_a_at	STMN1	stathmin 1	Kim Molecular Cancer 2010	MS2_UP	6998	0.65
			Lindgren Cancer Research 2010	MS2_UP
			StranskyNatGen	MS2_UP
201212_at	LGMN	legumain	Kim Molecular Cancer 2010	MS2_UP	7004	0.65
			Lindgren Cancer Research 2010	MS1_UP
			StranskyNatGen	MS1_UP
201041_s_at	DUSP1	dual specificity phosphatase 1	DyrskjotNatGen	MS2_UP	7206	0.625
			SanchezCarbayoJCO	MS2_UP
			StranskyNatGen	MS2_UP
212038_s_at	VDAC1	voltage-dependent anion channel 1	Kim Molecular Cancer 2010	MS2_UP	7369	0.606
			SanchezCarbayoJCO	MS1_UP
			StranskyNatGen	MS1_UP
214774_x_at	TOX3	TOX high mobility group box family member 3	SanchezCarbayoJCO	MS1_UP	1, 3, 6	-5.5
			StranskyNatGen	MS1_UP
1560011_at	PSCA	prostate stem cell antigen	SanchezCarbayoJCO	MS1_UP	4	-5.26
			StranskyNatGen	MS1_UP
207862_at	UPK2	uroplakin 2	SanchezCarbayoJCO	MS1_UP	10	-4.64
			StranskyNatGen	MS1_UP
219666_at	MS4A6A	membrane-spanning 4-domains, subfamily A, member 6A	Kim Molecular Cancer 2010	MS2_UP	36, 61, 147, 354, 628	3.21
			SanchezCarbayoJCO	MS2_UP
205681_at	BCL2A1	BCL2-related protein A1	DyrskjotNatGen	MS2_UP	55	3.78
			SanchezCarbayoJCO	MS2_UP
201842_s_at	EFEMP1	EGF-containing fibulin-like extracellular matrix protein 1	SanchezCarbayoJCO	MS2_UP	66, 177	3.39
			StranskyNatGen	MS2_UP
201510_at	ELF3	E74-like factor 3 (ets domain transcription factor, epithelial-specific )	SanchezCarbayoJCO	MS1_UP	73, 195, 432	-3.08
			StranskyNatGen	MS1_UP
205488_at	GZMA	granzyme A (granzyme 1, cytotoxic T-lymphocyte-associated serine esterase 3)	DyrskjotNatGen	MS2_UP	74	3.58
			SanchezCarbayoJCO	MS2_UP
218232_at	C1QA	complement component 1, q subcomponent, A chain	Kim Molecular Cancer 2010	MS2_UP	79	3.55
			SanchezCarbayoJCO	MS2_UP
204750_s_at	DSC2	desmocollin 2	DyrskjotNatGen	MS2_UP	102, 374, 562	2.82
			StranskyNatGen	MS2_UP
203691_at	PI3	peptidase inhibitor 3, skin-derived	DyrskjotNatGen	MS2_UP	105, 337	3.07
			SanchezCarbayoJCO	MS2_UP
213629_x_at	MT1F	metallothionein 1F	SanchezCarbayoJCO	MS2_UP	108, 323	3.08
			StranskyNatGen	MS2_UP
1554534_at	DPYD	dihydropyrimidine dehydrogenase	Kim Molecular Cancer 2010	MS2_UP	117	3.35
			SanchezCarbayoJCO	MS2_UP
1558378_a_at	AHNAK2	AHNAK nucleoprotein 2	SanchezCarbayoJCO	MS2_UP	150	3.24
			StranskyNatGen	MS2_UP
1553970_s_at	FAP	carboxyl ester lipase (bile salt-stimulated lipase)	SanchezCarbayoJCO	MS2_UP	160	3.19
			StranskyNatGen	MS2_UP
210143_at	ANXA10	annexin A10	SanchezCarbayoJCO	MS1_UP	161	-3.18
			StranskyNatGen	MS1_UP
202685_s_at	AXL	AXL receptor tyrosine kinase	SanchezCarbayoJCO	MS2_UP	186	3.09
			StranskyNatGen	MS2_UP
204955_at	SRPX	sushi-repeat-containing protein, X-linked	Kim Molecular Cancer 2010	MS2_UP	191	3.07
			SanchezCarbayoJCO	MS2_UP
213797_at	RSAD2	radical S-adenosyl methionine domain containing 2	SanchezCarbayoJCO	MS2_UP	196, 284	2.96
			StranskyNatGen	MS2_UP
205487_s_at	VGLL1	vestigial like 1 (Drosophila)	DyrskjotNatGen	MS1_UP	202	-3.05
			SanchezCarbayoJCO	MS1_UP
1558867_at	DSE	dermatan sulfate epimerase	Kim Molecular Cancer 2010	MS2_UP	207	3.03
			SanchezCarbayoJCO	MS2_UP
212859_x_at	MT1E	metallothionein 1E	SanchezCarbayoJCO	MS2_UP	209	3.03
			StranskyNatGen	MS2_UP
202206_at	ARL4C	ADP-ribosylation factor-like 4C	SanchezCarbayoJCO	MS2_UP	223, 512, 2888	2.24
			StranskyNatGen	MS2_UP
206214_at	PLA2G7	phospholipase A2, group VII (platelet-activating factor acetylhydrolase, plasma)	DyrskjotNatGen	MS2_UP	225	2.99
			SanchezCarbayoJCO	MS2_UP
209696_at	FBP1	fructose-1,6-bisphosphatase 1	SanchezCarbayoJCO	MS1_UP	227	-2.99
			StranskyNatGen	MS1_UP
225353_s_at	C1QC	complement component 1, q subcomponent, C chain	Kim Molecular Cancer 2010	MS2_UP	247	2.95
			Lindgren Cancer Research 2010	MS2_UP
214038_at	CCL8	chemokine (C-C motif) ligand 8	SanchezCarbayoJCO	MS2_UP	253	2.93
			StranskyNatGen	MS2_UP
1558393_at	KRT7	keratin 7	SanchezCarbayoJCO	MS1_UP	257	-2.92
			StranskyNatGen	MS1_UP
1569300_at	MFAP3L	microfibrillar-associated protein 3-like	SanchezCarbayoJCO	MS1_UP	258	-2.92
			StranskyNatGen	MS1_UP
219682_s_at	TBX3	T-box 3	Lindgren Cancer Research 2010	MS1_UP	261, 364, 452	-2.72
			SanchezCarbayoJCO	MS1_UP
212325_at	LIMCH1	LIM and calponin homology domains 1	Lindgren Cancer Research 2010	MS1_UP	264, 468, 885, 888	-2.39
			SanchezCarbayoJCO	MS1_UP
205093_at	PLEKHA6	pleckstrin homology domain containing, family A member 6	Lindgren Cancer Research 2010	MS1_UP	267	-2.89
			StranskyNatGen	MS1_UP
213865_at	DCBLD2	discoidin, CUB and LCCL domain containing 2	Kim Molecular Cancer 2010	MS2_UP	268, 543	2.65
			Lindgren Cancer Research 2010	MS2_UP
218657_at	RAPGEFL1	Rap guanine nucleotide exchange factor (GEF)-like 1	Kim Molecular Cancer 2010	MS1_UP	270	-2.88
			SanchezCarbayoJCO	MS1_UP
205166_at	CAPN5	calpain 5	Kim Molecular Cancer 2010	MS1_UP	272	-2.88
			SanchezCarbayoJCO	MS1_UP
204484_at	PIK3C2B	phosphoinositide-3-kinase, class 2, beta polypeptide	SanchezCarbayoJCO	MS1_UP	276	-2.87
			StranskyNatGen	MS1_UP
220088_at	C5AR1	complement component 5a receptor 1	DyrskjotNatGen	MS2_UP	283	2.86
			SanchezCarbayoJCO	MS2_UP
221880_s_at	FAM174B	family with sequence similarity 174, member B	Lindgren Cancer Research 2010	MS1_UP	290, 381	-2.74
			SanchezCarbayoJCO	MS1_UP
210029_at	IDO1	indoleamine 2,3-dioxygenase 1	DyrskjotNatGen	MS2_UP	297	2.82
			SanchezCarbayoJCO	MS2_UP
202085_at	TJP2	tight junction protein 2 (zona occludens 2)	SanchezCarbayoJCO	MS1_UP	300, 2556	-2.08
			StranskyNatGen	MS1_UP
204072_s_at	FRY	furry homolog (Drosophila)	SanchezCarbayoJCO	MS1_UP	306, 969, 5419	-1.88
			StranskyNatGen	MS1_UP
205941_s_at	COL10A1	collagen, type X, alpha 1	SanchezCarbayoJCO	MS2_UP	321, 594	2.55
			StranskyNatGen	MS2_UP
206527_at	ABAT	4-aminobutyrate aminotransferase	SanchezCarbayoJCO	MS1_UP	327, 859	-2.42
			StranskyNatGen	MS1_UP
204197_s_at	RUNX3	runt-related transcription factor 3	DyrskjotNatGen	MS2_UP	330, 1494	2.22
			SanchezCarbayoJCO	MS2_UP
210538_s_at	BIRC3*	baculoviral IAP repeat-containing 3	DyrskjotNatGen	MS2_UP	342	2.72
			SanchezCarbayoJCO	MS2_UP
212510_at	GPD1L	glycerol-3-phosphate dehydrogenase 1-like	SanchezCarbayoJCO	MS1_UP	348	-2.72
			StranskyNatGen	MS1_UP
215795_at	MYH14	myosin, heavy chain 7B, cardiac muscle, beta	Kim Molecular Cancer 2010	MS1_UP	355, 648, 708, 978	-2.31
			SanchezCarbayoJCO	MS1_UP
204787_at	VSIG4	V-set and immunoglobulin domain containing 4	SanchezCarbayoJCO	MS2_UP	366	2.67
			StranskyNatGen	MS2_UP
204320_at	COL11A1	collagen, type XI, alpha 1	SanchezCarbayoJCO	MS2_UP	367, 887, 1862	2.1
			StranskyNatGen	MS2_UP
219863_at	HERC5	hect domain and RLD 5	Kim Molecular Cancer 2010	MS2_UP	371	2.67
			SanchezCarbayoJCO	MS2_UP
213566_at	RNASE6	ribonuclease, RNase A family, k6	Kim Molecular Cancer 2010	MS2_UP	375	2.66
			SanchezCarbayoJCO	MS2_UP
210889_s_at	FCGR2B*	Fc fragment of IgG, low affinity IIb, receptor (CD32)	SanchezCarbayoJCO	MS2_UP	380	2.65
			StranskyNatGen	MS2_UP
206470_at	PLXNC1	plexin C1	SanchezCarbayoJCO	MS2_UP	399, 3419	1.89
			StranskyNatGen	MS2_UP
209406_at	BAG2	BCL2-associated athanogene 2	SanchezCarbayoJCO	MS2_UP	400	2.62
			StranskyNatGen	MS2_UP
209924_at	CCL18	chemokine (C-C motif) ligand 18 (pulmonary and activation-regulated)	SanchezCarbayoJCO	MS2_UP	401, 913	2.33
			StranskyNatGen	MS2_UP
226743_at	SLFN11	schlafen family member 11	Kim Molecular Cancer 2010	MS2_UP	402	2.62
			Lindgren Cancer Research 2010	MS2_UP
210074_at	CTSL2	cathepsin L2	SanchezCarbayoJCO	MS2_UP	404	2.61
			StranskyNatGen	MS2_UP
221676_s_at	CORO1C	coronin, actin binding protein, 1C	Lindgren Cancer Research 2010	MS2_UP	419, 2574	1.97
			SanchezCarbayoJCO	MS2_UP
218559_s_at	MAFB*	v-maf musculoaponeurotic fibrosarcoma oncogene homolog B (avian)	Kim Molecular Cancer 2010	MS2_UP	425, 2053	2.04
			SanchezCarbayoJCO	MS2_UP
204235_s_at	GULP1	GULP, engulfment adaptor PTB domain containing 1	SanchezCarbayoJCO	MS2_UP	428, 449, 2354	2.18
			StranskyNatGen	MS2_UP
208033_s_at	ZFHX3	zinc finger homeobox 3	DyrskjotNatGen	MS1_UP	435, 506, 2091	-2.17
			SanchezCarbayoJCO	MS1_UP
207571_x_at	C1orf38	chromosome 1 open reading frame 38	SanchezCarbayoJCO	MS2_UP	437, 773	2.36
			StranskyNatGen	MS2_UP
212268_at	SERPINB1	serpin peptidase inhibitor, clade B (ovalbumin), member 1	Kim Molecular Cancer 2010	MS2_UP	448, 1093	2.24
			SanchezCarbayoJCO	MS2_UP
201920_at	SLC20A1	solute carrier family 20 (phosphate transporter), member 1	SanchezCarbayoJCO	MS1_UP	461, 5809	-1.67
			StranskyNatGen	MS1_UP
1555464_at	IFIH1	interferon induced with helicase C domain 1	Kim Molecular Cancer 2010	MS2_UP	462	2.54
			SanchezCarbayoJCO	MS2_UP
201887_at	IL13RA1	interleukin 13 receptor, alpha 1	Kim Molecular Cancer 2010	MS2_UP	464, 619, 966, 5692	1.92
			SanchezCarbayoJCO	MS2_UP
203290_at	HLA-DQA1	major histocompatibility complex, class II, DQ alpha 1	Kim Molecular Cancer 2010	MS2_UP	467, 1496	2.12
			StranskyNatGen	MS2_UP
1555118_at	ENTPD3	ectonucleoside triphosphate diphosphohydrolase 3	SanchezCarbayoJCO	MS1_UP	469	-2.53
			StranskyNatGen	MS1_UP
204858_s_at	TYMP	thymidine phosphorylase	SanchezCarbayoJCO	MS2_UP	472, 3990	1.79
			StranskyNatGen	MS2_UP
213262_at	SACS	spastic ataxia of Charlevoix-Saguenay (sacsin)	SanchezCarbayoJCO	MS2_UP	474	2.51
			StranskyNatGen	MS2_UP
204661_at	CD52	CD52 molecule	DyrskjotNatGen	MS2_UP	478, 935	2.26
			SanchezCarbayoJCO	MS2_UP
218706_s_at	GRAMD3	GRAM domain containing 3	Kim Molecular Cancer 2010	MS1_UP	482	-2.49
			SanchezCarbayoJCO	MS1_UP
203304_at	BAMBI	BMP and activin membrane-bound inhibitor homolog (Xenopus laevis)	SanchezCarbayoJCO	MS1_UP	501	-2.47
			StranskyNatGen	MS1_UP
206247_at	MICB	MHC class I polypeptide-related sequence B	SanchezCarbayoJCO	MS2_UP	528	2.43
			StranskyNatGen	MS2_UP
204118_at	CD48	CD48 molecule	DyrskjotNatGen	MS2_UP	538	2.42
			SanchezCarbayoJCO	MS2_UP
205419_at	GPR183	G protein-coupled receptor 183	SanchezCarbayoJCO	MS2_UP	545	2.41
			StranskyNatGen	MS2_UP
209906_at	C3AR1	complement component 3a receptor 1	DyrskjotNatGen	MS2_UP	560	2.4
			SanchezCarbayoJCO	MS2_UP
203415_at	PDCD6	programmed cell death 6	Kim Molecular Cancer 2010	MS2_UP	568, 5608, 6996	-0.851
			SanchezCarbayoJCO	MS1_UP
205542_at	STEAP1	six transmembrane epithelial antigen of the prostate 1	Kim Molecular Cancer 2010	MS2_UP	569	2.39
			StranskyNatGen	MS2_UP
201718_s_at	EPB41L2	erythrocyte membrane protein band 4.1-like 2	SanchezCarbayoJCO	MS2_UP	572, 2283	1.9
			StranskyNatGen	MS2_UP
203876_s_at	MMP11	matrix metallopeptidase 11 (stromelysin 3)	SanchezCarbayoJCO	MS2_UP	574, 824	2.25
			StranskyNatGen	MS2_UP
212190_at	SERPINE2	serpin peptidase inhibitor, clade E (nexin, plasminogen activator inhibitor type 1), member 2	SanchezCarbayoJCO	MS2_UP	579	2.37
			StranskyNatGen	MS2_UP
204745_x_at	MT1G	metallothionein 1G	Kim Molecular Cancer 2010	MS2_UP	593	2.35
			SanchezCarbayoJCO	MS2_UP
204926_at	INHBA	inhibin, beta A	Lindgren Cancer Research 2010	MS2_UP	596, 6345	1.54
			SanchezCarbayoJCO	MS2_UP
204912_at	IL10RA	interleukin 10 receptor, alpha	DyrskjotNatGen	MS2_UP	606	2.34
			SanchezCarbayoJCO	MS2_UP
204731_at	TGFBR3	transforming growth factor, beta receptor III	SanchezCarbayoJCO	MS1_UP	610, 691	-2.29
			StranskyNatGen	MS1_UP
1554652_s_at	MAST4	microtubule associated serine/threonine kinase family member 4	SanchezCarbayoJCO	MS1_UP	612, 995, 1448, 1612, 3141	-1.79
			StranskyNatGen	MS1_UP
204962_s_at	CENPA	centromere protein A	Kim Molecular Cancer 2010	MS2_UP	616	2.33
			StranskyNatGen	MS2_UP
220779_at	PADI3	peptidyl arginine deiminase, type III	Kim Molecular Cancer 2010	MS1_UP	617	-2.33
			SanchezCarbayoJCO	MS1_UP
201893_x_at	DCN	decorin	Kim Molecular Cancer 2010	MS2_UP	633, 1105, 1198, 1362	1.96
			SanchezCarbayoJCO	MS2_UP
203747_at	AQP3	aquaporin 3 (Gill blood group)	SanchezCarbayoJCO	MS1_UP	656, 1182, 1191	-2.01
			StranskyNatGen	MS1_UP
203104_at	CSF1R	colony stimulating factor 1 receptor	DyrskjotNatGen	MS2_UP	670	2.26
			SanchezCarbayoJCO	MS2_UP
204890_s_at	LCK*	lymphocyte-specific protein tyrosine kinase	DyrskjotNatGen	MS2_UP	683, 1653	1.95
			SanchezCarbayoJCO	MS2_UP
1555834_at	UCHL1	ubiquitin carboxyl-terminal esterase L1 (ubiquitin thiolesterase)	Kim Molecular Cancer 2010	MS2_UP	689	2.25
			SanchezCarbayoJCO	MS2_UP
211564_s_at	PDLIM4	PDZ and LIM domain 4	SanchezCarbayoJCO	MS2_UP	695, 1935	1.89
			StranskyNatGen	MS2_UP
218186_at	RAB25	RAB25, member RAS oncogene family	Lindgren Cancer Research 2010	MS1_UP	699	-2.24
			SanchezCarbayoJCO	MS1_UP
208309_s_at	MALT1*	mucosa associated lymphoid tissue lymphoma translocation gene 1	SanchezCarbayoJCO	MS2_UP	701, 851, 7066	1.66
			StranskyNatGen	MS2_UP
214581_x_at	TNFRSF21	tumor necrosis factor receptor superfamily, member 21	SanchezCarbayoJCO	MS1_UP	705, 800	-2.18
			StranskyNatGen	MS1_UP
1553167_a_at	SLA	Sep (O-phosphoserine) tRNA:Sec (selenocysteine) tRNA synthase	DyrskjotNatGen	MS2_UP	711, 1463	1.97
			SanchezCarbayoJCO	MS2_UP
1569033_at	IGF2BP3	insulin-like growth factor 2 mRNA binding protein 3	SanchezCarbayoJCO	MS2_UP	715	2.22
			StranskyNatGen	MS2_UP
213125_at	OLFML2B	olfactomedin-like 2B	SanchezCarbayoJCO	MS2_UP	716	2.22
			StranskyNatGen	MS2_UP
214180_at	MAN1C1	mannosidase, alpha, class 1C, member 1	Kim Molecular Cancer 2010	MS2_UP	722, 788	-2.18
			SanchezCarbayoJCO	MS1_UP
205831_at	CD2	CD2 molecule	DyrskjotNatGen	MS2_UP	736	2.21
			SanchezCarbayoJCO	MS2_UP
206666_at	GZMK	granzyme K (granzyme 3; tryptase II)	DyrskjotNatGen	MS2_UP	742	2.2
			SanchezCarbayoJCO	MS2_UP
211596_s_at	LRIG1	leucine-rich repeats and immunoglobulin-like domains 1	SanchezCarbayoJCO	MS2_UP	751	2.18
			StranskyNatGen	MS2_UP
220319_s_at	MYLIP	myosin regulatory light chain interacting protein	Kim Molecular Cancer 2010	MS2_UP	772, 1010, 1543, 2484, 3071	-1.68
			SanchezCarbayoJCO	MS1_UP
208456_s_at	RRAS2	related RAS viral (r-ras) oncogene homolog 2	Kim Molecular Cancer 2010	MS2_UP	776, 1274, 4973	1.63
			SanchezCarbayoJCO	MS2_UP
1567627_at	CD74*	CD74 molecule, major histocompatibility complex, class II invariant chain	DyrskjotNatGen	MS2_UP	777, 2676	1.74
			Kim Molecular Cancer 2010	MS2_UP
217546_at	MT1M	metallothionein 1M	Kim Molecular Cancer 2010	MS2_UP	781	2.15
			SanchezCarbayoJCO	MS2_UP
204281_at	TEAD4	TEA domain family member 4	SanchezCarbayoJCO	MS2_UP	789, 3029	1.69
			StranskyNatGen	MS2_UP
210119_at	KCNJ15	potassium inwardly-rectifying channel, subfamily J, member 15	SanchezCarbayoJCO	MS1_UP	794, 3468	-1.65
			StranskyNatGen	MS1_UP
1554696_s_at	TYMS	thymidylate synthetase	Kim Molecular Cancer 2010	MS2_UP	826, 2326	1.76
			StranskyNatGen	MS2_UP
214594_x_at	ATP8B1	ATPase, aminophospholipid transporter, class I, type 8B, member 1	SanchezCarbayoJCO	MS2_UP	839, 4836	-1.51
			StranskyNatGen	MS1_UP
213943_at	TWIST1	twist homolog 1 (Drosophila)	SanchezCarbayoJCO	MS2_UP	843	2.1
			StranskyNatGen	MS2_UP
203058_s_at	PAPSS2	3'-phosphoadenosine 5'-phosphosulfate synthase 2	Kim Molecular Cancer 2010	MS2_UP	849, 861	2.09
			SanchezCarbayoJCO	MS2_UP
203305_at	F13A1	coagulation factor XIII, A1 polypeptide	DyrskjotNatGen	MS2_UP	850	2.1
			SanchezCarbayoJCO	MS2_UP
203828_s_at	IL32	interleukin 32	DyrskjotNatGen	MS2_UP	854	2.09
			SanchezCarbayoJCO	MS2_UP
203722_at	ALDH4A1	aldehyde dehydrogenase 4 family, member A1	SanchezCarbayoJCO	MS1_UP	876	-2.07
			StranskyNatGen	MS1_UP
203323_at	CAV2	caveolin 2	Kim Molecular Cancer 2010	MS2_UP	900, 1574	1.86
			SanchezCarbayoJCO	MS2_UP
202780_at	OXCT1	3-oxoacid CoA transferase 1	SanchezCarbayoJCO	MS2_UP	901	2.05
			StranskyNatGen	MS2_UP
219241_x_at	SSH3	slingshot homolog 3 (Drosophila)	Kim Molecular Cancer 2010	MS1_UP	905, 956, 1156	-1.99
			SanchezCarbayoJCO	MS1_UP
1568779_a_at	ECM2	extracellular matrix protein 2, female organ and adipocyte specific	SanchezCarbayoJCO	MS2_UP	917	2.04
			StranskyNatGen	MS2_UP
202746_at	ITM2A	integral membrane protein 2A	Kim Molecular Cancer 2010	MS2_UP	925, 4072	1.54
			SanchezCarbayoJCO	MS2_UP
206504_at	CYP24A1	cytochrome P450, family 24, subfamily A, polypeptide 1	DyrskjotNatGen	MS1_UP	950	-2.02
			StranskyNatGen	MS1_UP
208647_at	FDFT1	farnesyl-diphosphate farnesyltransferase 1	Kim Molecular Cancer 2010	MS2_UP	957, 7057	-1.33
			SanchezCarbayoJCO	MS1_UP
203431_s_at	ARHGAP32	Rho GTPase activating protein 32	SanchezCarbayoJCO	MS1_UP	971, 982, 1050, 3481	-1.78
			StranskyNatGen	MS1_UP
1555564_a_at	CFI	complement factor I	DyrskjotNatGen	MS2_UP	979, 1027	1.99
			SanchezCarbayoJCO	MS2_UP
204201_s_at	PTPN13	protein tyrosine phosphatase, non-receptor type 13 (APO-1/CD95 (Fas)-associated phosphatase)	SanchezCarbayoJCO	MS1_UP	998	-1.99
			StranskyNatGen	MS1_UP
205926_at	IL27RA	interleukin 27 receptor, alpha	Lindgren Cancer Research 2010	MS2_UP	1059, 7243	1.29
			StranskyNatGen	MS2_UP
205828_at	MMP3	matrix metallopeptidase 3 (stromelysin 1, progelatinase)	SanchezCarbayoJCO	MS2_UP	1061	1.95
			StranskyNatGen	MS2_UP
204141_at	TUBB2A	tubulin, beta 2A	SanchezCarbayoJCO	MS2_UP	1064	1.95
			StranskyNatGen	MS2_UP
200096_s_at	ATP6V0E1	ATPase, H+ transporting, lysosomal 9kDa, V0 subunit e1	Kim Molecular Cancer 2010	MS2_UP	1067, 4331, 5811	1.25
			SanchezCarbayoJCO	MS2_UP
1566739_at	PLCE1	phospholipase C, epsilon 1	SanchezCarbayoJCO	MS1_UP	1073, 1416	-1.84
			StranskyNatGen	MS1_UP
203472_s_at	SLCO2B1	solute carrier organic anion transporter family, member 2B1	SanchezCarbayoJCO	MS2_UP	1075	1.94
			StranskyNatGen	MS2_UP
207191_s_at	ISLR	immunoglobulin superfamily containing leucine-rich repeat	SanchezCarbayoJCO	MS2_UP	1090	1.93
			StranskyNatGen	MS2_UP
209431_s_at	PATZ1	POZ (BTB) and AT hook containing zinc finger 1	SanchezCarbayoJCO	MS1_UP	1094, 3884	-1.5
			StranskyNatGen	MS1_UP
219870_at	ATF7IP2	activating transcription factor 7 interacting protein 2	Kim Molecular Cancer 2010	MS1_UP	1099, 3363	-1.55
			SanchezCarbayoJCO	MS1_UP
200796_s_at	MCL1	myeloid cell leukemia sequence 1 (BCL2-related)	DyrskjotNatGen	MS2_UP	1106, 2866, 4725	1.38
			SanchezCarbayoJCO	MS2_UP
205569_at	LAMP3	lysosomal-associated membrane protein 3	SanchezCarbayoJCO	MS2_UP	1108	1.92
			StranskyNatGen	MS2_UP
1565162_s_at	MGST1	microsomal glutathione S-transferase 1	DyrskjotNatGen	MS1_UP	1112	-1.92
			Kim Molecular Cancer 2010	MS2_UP
214710_s_at	CCNB1	cyclin B1	Lindgren Cancer Research 2010	MS2_UP	1114, 2931	1.59
			StranskyNatGen	MS2_UP
1557938_s_at	PTRF	polymerase I and transcript release factor	SanchezCarbayoJCO	MS2_UP	1121, 1192, 1473	1.83
			StranskyNatGen	MS2_UP
200737_at	PGK1	phosphoglycerate kinase 1	Kim Molecular Cancer 2010	MS2_UP	1139, 1203, 3897, 4340, 4632	1.36
			SanchezCarbayoJCO	MS1_UP
209879_at	SELPLG	selectin P ligand	DyrskjotNatGen	MS2_UP	1142	1.89
			SanchezCarbayoJCO	MS2_UP
204688_at	SGCE	sarcoglycan, epsilon	Kim Molecular Cancer 2010	MS2_UP	1145	1.89
			Lindgren Cancer Research 2010	MS2_UP
220232_at	SCD5	stearoyl-CoA desaturase 5	Lindgren Cancer Research 2010	MS2_UP	1149, 7305	0.639
			SanchezCarbayoJCO	MS2_UP
204033_at	TRIP13	thyroid hormone receptor interactor 13	Lindgren Cancer Research 2010	MS2_UP	1155	1.89
			StranskyNatGen	MS2_UP
1559882_at	SAMHD1	SAM domain and HD domain 1	SanchezCarbayoJCO	MS2_UP	1160, 1915	1.71
			StranskyNatGen	MS2_UP
218802_at	CCDC109B	coiled-coil domain containing 109B	Kim Molecular Cancer 2010	MS2_UP	1166	1.88
			SanchezCarbayoJCO	MS2_UP
205613_at	SYT17	synaptotagmin XVII	Kim Molecular Cancer 2010	MS1_UP	1179, 1529	-1.78
			SanchezCarbayoJCO	MS1_UP
209201_x_at	LAP3	chemokine (C-X-C motif) receptor 4	Kim Molecular Cancer 2010	MS2_UP	1190	1.87
			SanchezCarbayoJCO	MS2_UP
208447_s_at	PRPS1	phosphoribosyl pyrophosphate synthetase 1	Kim Molecular Cancer 2010	MS2_UP	1207, 1724	1.74
			StranskyNatGen	MS2_UP
206059_at	ZNF91	zinc finger protein 91	DyrskjotNatGen	MS1_UP	1208, 3603	-1.49
			StranskyNatGen	MS1_UP
218404_at	SNX10	sorting nexin 10	Kim Molecular Cancer 2010	MS2_UP	1211	1.85
			SanchezCarbayoJCO	MS2_UP
204604_at	CDK14	cyclin-dependent kinase 14	SanchezCarbayoJCO	MS2_UP	1214, 7290	1.23
			StranskyNatGen	MS2_UP
202104_s_at	SPG7	spastic paraplegia 7 (pure and complicated autosomal recessive)	Kim Molecular Cancer 2010	MS1_UP	1216, 3533, 5481, 5651	-1.16
			SanchezCarbayoJCO	MS1_UP
213295_at	CYLD*	cylindromatosis (turban tumor syndrome)	Kim Molecular Cancer 2010	MS1_UP	1239	1.84
			SanchezCarbayoJCO	MS2_UP
203139_at	DAPK1	death-associated protein kinase 1	DyrskjotNatGen	MS1_UP	1269	-1.82
			SanchezCarbayoJCO	MS1_UP
1558571_at	ZMYND8	zinc finger, MYND-type containing 8	SanchezCarbayoJCO	MS1_UP	1277, 2966	-1.53
			StranskyNatGen	MS1_UP
204856_at	B3GNT3	UDP-GlcNAc:betaGal beta-1,3-N-acetylglucosaminyltransferase 3	SanchezCarbayoJCO	MS1_UP	1278	-1.82
			StranskyNatGen	MS1_UP
208103_s_at	ANP32E	acidic (leucine-rich) nuclear phosphoprotein 32 family, member E	SanchezCarbayoJCO	MS2_UP	1291, 2036	1.66
			StranskyNatGen	MS2_UP
204416_x_at	APOC1	apolipoprotein C-I	SanchezCarbayoJCO	MS2_UP	1304, 5724	1.3
			StranskyNatGen	MS2_UP
219806_s_at	C11orf75	chromosome 11 open reading frame 75	Kim Molecular Cancer 2010	MS2_UP	1317	1.79
			SanchezCarbayoJCO	MS2_UP
205168_at	DDR2	discoidin domain receptor tyrosine kinase 2	SanchezCarbayoJCO	MS2_UP	1333, 4376	1.39
			StranskyNatGen	MS2_UP
222240_s_at	ISYNA1	inositol-3-phosphate synthase 1	Kim Molecular Cancer 2010	MS1_UP	1336	-1.77
			SanchezCarbayoJCO	MS1_UP
224762_at	SERINC2	serine incorporator 2	Kim Molecular Cancer 2010	MS1_UP	1366	-1.76
			Lindgren Cancer Research 2010	MS1_UP
205173_x_at	CD58	CD58 molecule	Kim Molecular Cancer 2010	MS2_UP	1379, 3587, 4265	1.3
			StranskyNatGen	MS1_UP
201596_x_at	KRT18	keratin 18	DyrskjotNatGen	MS1_UP	1386	-1.75
			SanchezCarbayoJCO	MS1_UP
213412_at	TJP3	tight junction protein 3 (zona occludens 3)	SanchezCarbayoJCO	MS1_UP	1394, 4514	-1.36
			StranskyNatGen	MS1_UP
200838_at	CTSB	cathepsin B	Kim Molecular Cancer 2010	MS2_UP	1411, 1948, 3011, 3517	1.41
			SanchezCarbayoJCO	MS2_UP
218191_s_at	LMBRD1	LMBR1 domain containing 1	Kim Molecular Cancer 2010	MS2_UP	1412	-1.74
			Lindgren Cancer Research 2010	MS1_UP
202387_at	BAG1	BCL2-associated athanogene	SanchezCarbayoJCO	MS1_UP	1414	-1.74
			StranskyNatGen	MS1_UP
209468_at	LRP5	low density lipoprotein receptor-related protein 5	SanchezCarbayoJCO	MS1_UP	1419	-1.74
			StranskyNatGen	MS1_UP
209083_at	CORO1A	coronin, actin binding protein, 1A	DyrskjotNatGen	MS2_UP	1422	1.74
			StranskyNatGen	MS2_UP
212607_at	AKT3	v-akt murine thymoma viral oncogene homolog 3 (protein kinase B, gamma)	DyrskjotNatGen	MS2_UP	1429, 3065	1.48
			SanchezCarbayoJCO	MS2_UP
1558691_a_at	DOCK4	dedicator of cytokinesis 4	SanchezCarbayoJCO	MS2_UP	1432	1.73
			StranskyNatGen	MS2_UP
209540_at	IGF1	insulin-like growth factor 1 (somatomedin C)	DyrskjotNatGen	MS2_UP	1455	1.72
			SanchezCarbayoJCO	MS2_UP
204639_at	ADA	adenosine deaminase	SanchezCarbayoJCO	MS2_UP	1457, 6051	1.24
			StranskyNatGen	MS2_UP
207691_x_at	ENTPD1	ectonucleoside triphosphate diphosphohydrolase 1	DyrskjotNatGen	MS2_UP	1481, 1738, 3042	1.52
			SanchezCarbayoJCO	MS2_UP
210095_s_at	IGFBP3	insulin-like growth factor binding protein 3	SanchezCarbayoJCO	MS1_UP	1499, 1619	-1.68
			StranskyNatGen	MS1_UP
203417_at	MFAP2	microfibrillar-associated protein 2	SanchezCarbayoJCO	MS2_UP	1501	1.7
			StranskyNatGen	MS2_UP
208414_s_at	HOXB3	homeobox B3	Kim Molecular Cancer 2010	MS1_UP	1517	-1.7
			StranskyNatGen	MS1_UP
203434_s_at	MME	membrane metallo-endopeptidase	Lindgren Cancer Research 2010	MS2_UP	1519	1.7
			SanchezCarbayoJCO	MS2_UP
207808_s_at	PROS1	protein S (alpha)	Kim Molecular Cancer 2010	MS2_UP	1528	1.69
			SanchezCarbayoJCO	MS2_UP
204879_at	PDPN	podoplanin	SanchezCarbayoJCO	MS2_UP	1548, 2255	1.56
			StranskyNatGen	MS2_UP
206385_s_at	ANK3	ankyrin 3, node of Ranvier (ankyrin G)	SanchezCarbayoJCO	MS1_UP	1550, 4243, 4346, 5279	-1.14
			StranskyNatGen	MS1_UP
202341_s_at	TRIM2	tripartite motif-containing 2	SanchezCarbayoJCO	MS1_UP	1559, 3608, 4988	-1.24
			StranskyNatGen	MS1_UP
204898_at	SAP30	Sin3A-associated protein, 30kDa	Kim Molecular Cancer 2010	MS2_UP	1578	1.67
			StranskyNatGen	MS2_UP
206100_at	CPM	carboxypeptidase M	Lindgren Cancer Research 2010	MS2_UP	1581	1.67
			SanchezCarbayoJCO	MS2_UP
1565906_at	NADSYN1	NAD synthetase 1	Kim Molecular Cancer 2010	MS1_UP	1583, 1814	-1.62
			SanchezCarbayoJCO	MS1_UP
213844_at	HOXA5	homeobox A5	SanchezCarbayoJCO	MS1_UP	1592	-1.67
			StranskyNatGen	MS1_UP
201476_s_at	RRM1	ribonucleotide reductase M1	SanchezCarbayoJCO	MS2_UP	1598, 6848	1.17
			StranskyNatGen	MS2_UP
201571_s_at	DCTD	dCMP deaminase	DyrskjotNatGen	MS1_UP	1604	1.66
			SanchezCarbayoJCO	MS1_UP
1554569_a_at	CELF2	CUGBP, Elav-like family member 2	DyrskjotNatGen	MS2_UP	1631, 2178, 3437	1.42
			SanchezCarbayoJCO	MS2_UP
213716_s_at	SECTM1	secreted and transmembrane 1	SanchezCarbayoJCO	MS2_UP	1634	1.65
			StranskyNatGen	MS2_UP
223234_at	MAD2L2	MAD2 mitotic arrest deficient-like 2 (yeast)	Kim Molecular Cancer 2010	MS2_UP	1635	1.65
			Lindgren Cancer Research 2010	MS2_UP
1558340_at	DIXDC1	DIX domain containing 1	Kim Molecular Cancer 2010	MS2_UP	1654	1.64
			SanchezCarbayoJCO	MS2_UP
1554394_at	NRP1	NEL-like 1 (chicken)	Lindgren Cancer Research 2010	MS2_UP	1657, 2337	1.53
			SanchezCarbayoJCO	MS2_UP
209765_at	ADAM19	ADAM metallopeptidase domain 19	SanchezCarbayoJCO	MS2_UP	1658	1.64
			StranskyNatGen	MS2_UP
209155_s_at	NT5C2	5'-nucleotidase, cytosolic II	SanchezCarbayoJCO	MS1_UP	1662, 4192	-1.33
			StranskyNatGen	MS1_UP
207749_s_at	PPP2R3A	protein phosphatase 2, regulatory subunit B'', alpha	Kim Molecular Cancer 2010	MS1_UP	1695, 5177, 6385	1.07
			SanchezCarbayoJCO	MS2_UP
221523_s_at	RRAGD	Ras-related GTP binding D	SanchezCarbayoJCO	MS2_UP	1705, 3260	1.41
			StranskyNatGen	MS2_UP
1554464_a_at	CRTAP	cartilage associated protein	Kim Molecular Cancer 2010	MS2_UP	1715, 5528	1.22
			Lindgren Cancer Research 2010	MS1_UP
201089_at	ATP6V1B2	ATPase, H+ transporting, lysosomal 56/58kDa, V1 subunit B2	DyrskjotNatGen	MS2_UP	1725	1.61
			StranskyNatGen	MS2_UP
205190_at	PLS1	plastin 1	Kim Molecular Cancer 2010	MS2_UP	1728	-1.61
			SanchezCarbayoJCO	MS1_UP
209610_s_at	SLC1A4	solute carrier family 1 (glutamate/neutral amino acid transporter), member 4	SanchezCarbayoJCO	MS2_UP	1730, 2237, 4397	1.35
			StranskyNatGen	MS2_UP
212611_at	DTX4	deltex homolog 4 (Drosophila)	SanchezCarbayoJCO	MS1_UP	1742	-1.61
			StranskyNatGen	MS1_UP
1554499_s_at	PPA2	pyrophosphatase (inorganic) 2	Kim Molecular Cancer 2010	MS2_UP	1745, 3879	-0.264
			Lindgren Cancer Research 2010	MS1_UP
218782_s_at	ATAD2	ATPase family, AAA domain containing 2	Kim Molecular Cancer 2010	MS2_UP	1757, 4758	1.27
			Lindgren Cancer Research 2010	MS2_UP
1555997_s_at	IGFBP5	insulin-like growth factor binding protein 5	Lindgren Cancer Research 2010	MS1_UP	1795	1.58
			SanchezCarbayoJCO	MS2_UP
202313_at	PPP2R2A	protein phosphatase 2, regulatory subunit B, alpha	Lindgren Cancer Research 2010	MS1_UP	1801	-1.58
			StranskyNatGen	MS1_UP
204825_at	MELK	maternal embryonic leucine zipper kinase	Kim Molecular Cancer 2010	MS2_UP	1818	1.58
			StranskyNatGen	MS2_UP
203576_at	BCAT2	branched chain amino-acid transaminase 2, mitochondrial	SanchezCarbayoJCO	MS1_UP	1821	-1.58
			StranskyNatGen	MS1_UP
209167_at	GPM6B	glycoprotein M6B	SanchezCarbayoJCO	MS2_UP	1830, 4026, 5416, 5904	1.06
			StranskyNatGen	MS2_UP
203699_s_at	DIO2	deiodinase, iodothyronine, type II	SanchezCarbayoJCO	MS2_UP	1832, 2213, 2289	1.48
			StranskyNatGen	MS2_UP
210052_s_at	TPX2	TPX2, microtubule-associated, homolog (Xenopus laevis)	Lindgren Cancer Research 2010	MS2_UP	1848	1.57
			StranskyNatGen	MS2_UP
209514_s_at	RAB27A	RAB27A, member RAS oncogene family	DyrskjotNatGen	MS2_UP	1849, 2014, 2104, 3730, 4438	1.33
			SanchezCarbayoJCO	MS2_UP
226076_s_at	MBD6	methyl-CpG binding domain protein 6	Kim Molecular Cancer 2010	MS1_UP	1903, 2065	-1.52
			Lindgren Cancer Research 2010	MS1_UP
208022_s_at	CDC14B	CDC14 cell division cycle 14 homolog B (S. cerevisiae)	Kim Molecular Cancer 2010	MS1_UP	1912, 3290, 3664	-1.28
			SanchezCarbayoJCO	MS2_UP
204256_at	ELOVL6	ELOVL family member 6, elongation of long chain fatty acids (FEN1/Elo2, SUR4/Elo3-like, yeast)	SanchezCarbayoJCO	MS1_UP	1913, 3088	-1.39
			StranskyNatGen	MS1_UP
210875_s_at	ZEB1	zinc finger E-box binding homeobox 1	SanchezCarbayoJCO	MS2_UP	1927, 4907, 5100	1.11
			StranskyNatGen	MS2_UP
204162_at	NDC80	NDC80 homolog, kinetochore complex component (S. cerevisiae)	Kim Molecular Cancer 2010	MS2_UP	1928	1.54
			StranskyNatGen	MS2_UP
215684_s_at	ASCC2	activating signal cointegrator 1 complex subunit 2	SanchezCarbayoJCO	MS1_UP	1933	-1.54
			StranskyNatGen	MS1_UP
208687_x_at	HSPA8	heat shock 70kDa protein 8	Kim Molecular Cancer 2010	MS2_UP	1949, 3033, 3909, 6140	1.15
			SanchezCarbayoJCO	MS1_UP
201650_at	KRT19	keratin 19	SanchezCarbayoJCO	MS1_UP	1952	-1.53
			StranskyNatGen	MS1_UP
209973_at	LST1	nuclear factor of kappa light polypeptide gene enhancer in B-cells inhibitor-like 1	DyrskjotNatGen	MS2_UP	1954, 2222, 2765, 2846	1.39
			SanchezCarbayoJCO	MS2_UP
207968_s_at	MEF2C	myocyte enhancer factor 2C	DyrskjotNatGen	MS2_UP	1965, 5287	1.19
			SanchezCarbayoJCO	MS2_UP
202002_at	ACAA2	acetyl-CoA acyltransferase 2	Kim Molecular Cancer 2010	MS2_UP	1980	1.52
			StranskyNatGen	MS2_UP
1554616_at	CAP2	serpin peptidase inhibitor, clade B (ovalbumin), member 8	SanchezCarbayoJCO	MS2_UP	1985	1.52
			StranskyNatGen	MS2_UP
1555420_a_at	KLF7	Kruppel-like factor 7 (ubiquitous)	SanchezCarbayoJCO	MS2_UP	1986	1.52
			StranskyNatGen	MS2_UP
206662_at	GLRX	glutaredoxin (thioltransferase)	Kim Molecular Cancer 2010	MS2_UP	1995, 6536	1.11
			SanchezCarbayoJCO	MS2_UP
1555154_a_at	QKI	quaking homolog, KH domain RNA binding (mouse)	SanchezCarbayoJCO	MS2_UP	1996, 2814, 6113	1.19
			StranskyNatGen	MS2_UP
218872_at	TESC	tescalcin	Lindgren Cancer Research 2010	MS1_UP	2010	-1.51
			SanchezCarbayoJCO	MS1_UP
203779_s_at	MPZL2	myelin protein zero-like 2	SanchezCarbayoJCO	MS1_UP	2025, 2682	-1.41
			StranskyNatGen	MS1_UP
209642_at	BUB1	budding uninhibited by benzimidazoles 1 homolog (yeast)	Lindgren Cancer Research 2010	MS2_UP	2044	1.5
			StranskyNatGen	MS2_UP
1562677_at	HMMR	hyaluronan-mediated motility receptor (RHAMM)	Kim Molecular Cancer 2010	MS2_UP	2057, 2202	1.47
			SanchezCarbayoJCO	MS2_UP
203554_x_at	PTTG1	pituitary tumor-transforming 1	Kim Molecular Cancer 2010	MS2_UP	2074	1.49
			StranskyNatGen	MS2_UP
207346_at	STX2	syntaxin 2	SanchezCarbayoJCO	MS2_UP	2134	1.48
			StranskyNatGen	MS2_UP
205105_at	MAN2A1	mannosidase, alpha, class 2A, member 1	Lindgren Cancer Research 2010	MS1_UP	2142, 6864	1.07
			SanchezCarbayoJCO	MS1_UP
203636_at	MID1	midline 1 (Opitz/BBB syndrome)	SanchezCarbayoJCO	MS1_UP	2165, 2480	-1.41
			StranskyNatGen	MS1_UP
204782_at	MLF1*	myeloid leukemia factor 1	Kim Molecular Cancer 2010	MS2_UP	2207, 3304	1.32
			SanchezCarbayoJCO	MS2_UP
204127_at	RFC3	replication factor C (activator 1) 3, 38kDa	Lindgren Cancer Research 2010	MS2_UP	2218, 6840	1.06
			StranskyNatGen	MS2_UP
1565795_at	DUOX1	dual oxidase 1	Kim Molecular Cancer 2010	MS1_UP	2230	-1.44
			SanchezCarbayoJCO	MS1_UP
203886_s_at	FBLN2	fibulin 2	DyrskjotNatGen	MS2_UP	2236	1.44
			SanchezCarbayoJCO	MS2_UP
204725_s_at	NCK1	NCK adaptor protein 1	Kim Molecular Cancer 2010	MS2_UP	2244, 3767	1.27
			SanchezCarbayoJCO	MS2_UP
206550_s_at	NUP155	nucleoporin 155kDa	Lindgren Cancer Research 2010	MS2_UP	2269	1.43
			StranskyNatGen	MS2_UP
205538_at	CORO2A	coronin, actin binding protein, 2A	DyrskjotNatGen	MS1_UP	2270	-1.43
			StranskyNatGen	MS1_UP
213422_s_at	MXRA8	matrix-remodelling associated 8	SanchezCarbayoJCO	MS2_UP	2275	1.43
			StranskyNatGen	MS2_UP
201940_at	CPD	carboxypeptidase D	Kim Molecular Cancer 2010	MS2_UP	2298, 5491, 5628	1.02
			Lindgren Cancer Research 2010	MS2_UP
213358_at	KIAA0802	KIAA0802	SanchezCarbayoJCO	MS1_UP	2311	-1.42
			StranskyNatGen	MS1_UP
1570507_at	SRSF2IP	serine/arginine-rich splicing factor 2, interacting protein	SanchezCarbayoJCO	MS2_UP	2321, 5583	-1.12
			StranskyNatGen	MS1_UP
205206_at	KAL1	Kallmann syndrome 1 sequence	SanchezCarbayoJCO	MS2_UP	2323	1.41
			StranskyNatGen	MS2_UP
1555587_at	PDZRN3	PDZ domain containing ring finger 3	SanchezCarbayoJCO	MS2_UP	2324	1.41
			StranskyNatGen	MS2_UP
206599_at	SLC16A5	solute carrier family 16, member 5 (monocarboxylic acid transporter 6)	SanchezCarbayoJCO	MS1_UP	2344, 2679, 5131	-1.2
			StranskyNatGen	MS1_UP
212458_at	SPRED2	sprouty-related, EVH1 domain containing 2	SanchezCarbayoJCO	MS1_UP	2359	-1.4
			StranskyNatGen	MS1_UP
212570_at	ENDOD1	endonuclease domain containing 1	Kim Molecular Cancer 2010	MS2_UP	2379	1.4
			SanchezCarbayoJCO	MS2_UP
1555578_at	PTPRM	protein tyrosine phosphatase, receptor type, M	SanchezCarbayoJCO	MS1_UP	2400, 2587	-1.36
			StranskyNatGen	MS1_UP
204257_at	FADS3	fatty acid desaturase 3	SanchezCarbayoJCO	MS2_UP	2432, 4798	1.15
			StranskyNatGen	MS2_UP
204163_at	EMILIN1	elastin microfibril interfacer 1	SanchezCarbayoJCO	MS2_UP	2437	1.38
			StranskyNatGen	MS2_UP
200810_s_at	CIRBP	cold inducible RNA binding protein	SanchezCarbayoJCO	MS1_UP	2446, 5970	-1.07
			StranskyNatGen	MS1_UP
207662_at	TBX1	T-box 1	Kim Molecular Cancer 2010	MS1_UP	2455	-1.37
			StranskyNatGen	MS1_UP
204967_at	SHROOM2	shroom family member 2	SanchezCarbayoJCO	MS1_UP	2481	-1.36
			StranskyNatGen	MS1_UP
207574_s_at	GADD45B	growth arrest and DNA-damage-inducible, beta	SanchezCarbayoJCO	MS2_UP	2492	1.36
			StranskyNatGen	MS2_UP
225687_at	FAM83D	family with sequence similarity 83, member D	Kim Molecular Cancer 2010	MS2_UP	2519	1.36
			Lindgren Cancer Research 2010	MS2_UP
206364_at	KIF14	kinesin family member 14	DyrskjotNatGen	MS2_UP	2521, 2819	1.32
			StranskyNatGen	MS2_UP
203753_at	TCF4	transcription factor 4	DyrskjotNatGen	MS2_UP	2564, 4422, 5009, 5122, 5661, 6291	0.942
			SanchezCarbayoJCO	MS2_UP
1555027_at	P4HA2	prolyl 4-hydroxylase, alpha polypeptide II	Kim Molecular Cancer 2010	MS2_UP	2591	1.34
			StranskyNatGen	MS2_UP
204445_s_at	ALOX5	arachidonate 5-lipoxygenase	SanchezCarbayoJCO	MS1_UP	2647, 5729	-1.06
			StranskyNatGen	MS1_UP
1555270_a_at	WFS1	Wolfram syndrome 1 (wolframin)	Lindgren Cancer Research 2010	MS1_UP	2669	-1.32
			StranskyNatGen	MS1_UP
224650_at	MAL2	mal, T-cell differentiation protein 2	Kim Molecular Cancer 2010	MS2_UP	2673	-1.32
			Lindgren Cancer Research 2010	MS2_UP
203388_at	ARRB2	arrestin, beta 2	SanchezCarbayoJCO	MS2_UP	2677	1.32
			StranskyNatGen	MS2_UP
213078_x_at	LPCAT4	lysophosphatidylcholine acyltransferase 4	SanchezCarbayoJCO	MS1_UP	2681, 3524	-1.23
			StranskyNatGen	MS1_UP
201462_at	SCRN1	secernin 1	SanchezCarbayoJCO	MS2_UP	2684	1.32
			StranskyNatGen	MS2_UP
1557349_at	RERE	arginine-glutamic acid dipeptide (RE) repeats	Lindgren Cancer Research 2010	MS1_UP	2687	-1.32
			SanchezCarbayoJCO	MS1_UP
1554198_at	SH3YL1	SH3 domain containing, Ysc84-like 1 (S. cerevisiae)	SanchezCarbayoJCO	MS1_UP	2689	-1.32
			StranskyNatGen	MS1_UP
1554725_at	RABGAP1L	RAB GTPase activating protein 1-like	SanchezCarbayoJCO	MS2_UP	2711, 3554, 5244	-0.528
			StranskyNatGen	MS1_UP
214023_x_at	TUBB2B	tubulin, beta 2B	Kim Molecular Cancer 2010	MS2_UP	2727	1.31
			StranskyNatGen	MS2_UP
204405_x_at	DIMT1L	DIM1 dimethyladenosine transferase 1-like (S. cerevisiae)	SanchezCarbayoJCO	MS1_UP	2730	1.31
			StranskyNatGen	MS1_UP
201013_s_at	PAICS	phosphoribosylaminoimidazole carboxylase, phosphoribosylaminoimidazole succinocarboxamide synthetase	Kim Molecular Cancer 2010	MS2_UP	2748	1.3
			Lindgren Cancer Research 2010	MS2_UP
202679_at	NPC1	Niemann-Pick disease, type C1	SanchezCarbayoJCO	MS2_UP	2750	1.3
			StranskyNatGen	MS2_UP
204767_s_at	FEN1	flap structure-specific endonuclease 1	Kim Molecular Cancer 2010	MS2_UP	2769, 4782	1.12
			StranskyNatGen	MS2_UP
212970_at	APBB2	amyloid beta (A4) precursor protein-binding, family B, member 2	SanchezCarbayoJCO	MS2_UP	2770, 3262, 4245	1.17
			StranskyNatGen	MS2_UP
201544_x_at	PABPN1	poly(A) binding protein, nuclear 1	Kim Molecular Cancer 2010	MS1_UP	2779	-1.3
			SanchezCarbayoJCO	MS2_UP
210919_at	PHLPP1	PH domain and leucine rich repeat protein phosphatase 1	SanchezCarbayoJCO	MS1_UP	2782	-1.29
			StranskyNatGen	MS1_UP
219396_s_at	NEIL1	nei endonuclease VIII-like 1 (E. coli)	Kim Molecular Cancer 2010	MS1_UP	2789	-1.29
			SanchezCarbayoJCO	MS1_UP
1568765_at	SERPINE1	serpin peptidase inhibitor, clade E (nexin, plasminogen activator inhibitor type 1), member 1	SanchezCarbayoJCO	MS2_UP	2799	1.29
			StranskyNatGen	MS2_UP
200889_s_at	SSR1	signal sequence receptor, alpha	Kim Molecular Cancer 2010	MS2_UP	2813, 4096	1.16
			SanchezCarbayoJCO	MS2_UP
213170_at	GPX7	glutathione peroxidase 7	Kim Molecular Cancer 2010	MS2_UP	2851	1.28
			StranskyNatGen	MS2_UP
204312_x_at	CREB1*	cAMP responsive element binding protein 1	Kim Molecular Cancer 2010	MS2_UP	2857, 5539, 5678, 7235	0.882
			SanchezCarbayoJCO	MS2_UP
1553530_a_at	ITGB1	integrin, beta 1 (fibronectin receptor, beta polypeptide, antigen CD29 includes MDF2, MSK12)	Kim Molecular Cancer 2010	MS2_UP	2869, 3180	1.24
			SanchezCarbayoJCO	MS2_UP
201897_s_at	CKS1B	CDC28 protein kinase regulatory subunit 1B	Kim Molecular Cancer 2010	MS2_UP	2874	1.27
			StranskyNatGen	MS2_UP
204792_s_at	IFT140	intraflagellar transport 140 homolog (Chlamydomonas)	Kim Molecular Cancer 2010	MS1_UP	2877	-1.27
			SanchezCarbayoJCO	MS1_UP
209365_s_at	ECM1	extracellular matrix protein 1	DyrskjotNatGen	MS2_UP	2920	1.26
			SanchezCarbayoJCO	MS2_UP
209006_s_at	C1orf63	chromosome 1 open reading frame 63	Lindgren Cancer Research 2010	MS1_UP	2926, 6081	-1.01
			StranskyNatGen	MS1_UP
209263_x_at	TSPAN4	tetraspanin 4	SanchezCarbayoJCO	MS2_UP	2933	1.26
			StranskyNatGen	MS2_UP
205807_s_at	TUFT1	tuftelin 1	Lindgren Cancer Research 2010	MS2_UP	2952	-1.25
			SanchezCarbayoJCO	MS1_UP
208116_s_at	MAN1A1	mannosidase, alpha, class 1A, member 1	Kim Molecular Cancer 2010	MS2_UP	2979	1.25
			SanchezCarbayoJCO	MS2_UP
[truncated: 1,749 more rows]
